# Supplementary material for: Profiling of transcriptional regulators associated with starch biosynthesis in sorghum (Sorghum bicolor L.)
Source: Front Plant Sci. 2022 Aug 30;13:999747. doi: 10.3389/fpls.2022.999747 (PMC9468648; doi:10.3389/fpls.2022.999747)
Supplement: Supplementary file 1 [file Data_Sheet_1.xlsx]

## Sheet: Table S1
Table S1. Starch biosynthesis related gene in Arabidopsis thaliana and Zea mays L.
Genes	Arabidopsis					Maize
	Gene Name	Accession No.	Mutant	Reference		Gene Name	Accession No.	Mutant	Reference
ADP-glucose pyrophosphorylase	ArathAPS1	At5g48300		Lin et al., 1988b		ZmAGPS1a-1	NM_001111568	brittle 2	Bae et al., 1990
	ArathAPS2	At1g05610		Crevillén et al., 2003		ZmAGPS1a-2	DQ118038		Rösti et al.,2007
	ArathAPL1	At5g19220		Lin et al., 1988a		ZmAGPS1b	AF334960		Hannah et al., 2001
	ArathAPL2	At1g27680		Ventriglia et al., 2008		ZmAGPS2	NM_001111708		Hannah et al., 2001
	ArathAPL3	At4g39210		Ventriglia et al., 2008		ZmAGPL1	NM_001127632	shrunken 2	Bhave et al., 1990
	ArathAPL4	At2g21590		Ventriglia et al., 2008		ZmAGPL2	NM_001112247		Giroux et al., 1995
						ZmAGPL3	NM_001112588		Gardiner et al., 2004
						ZmAGPL4	EF694839		Soderlund et al., 2009
Starch synthesis enzymes	ArathGBSS	At1g32900		Szydlowski et al., 2011		ZmGBSSI	NM_001111531	waxy	Shure et al., 1983
	ArathSSI	At5g24300	ss1	Delvallé et al., 2005		ZmGBSSIIa	EF471312
	ArathSSII	At3g01180	ss2	Zang et al., 2008		ZmGBSSIIb	EF472248
	ArathSSIII	At1g11720	ss3	Zang et al., 2005		ZmSSI	NM_001111422		Knight et al., 1998
	ArathSSIV	At4g18240	ss4	Roldán et al., 2007		ZmSSIIa	AF019296	sugary2	Harn et al., 1998
						ZmSSIIb-1	NM_001111410	gss1	Harn et al., 1998
						ZmSSIIb-2	NM_001112544		Schnable et al., 2009
						ZmSSIIc	NM_001114648		Soderlund et al., 2009
						ZmSSIIIa	NM_001111411	dull1	Gao et al., 1998
						ZmSSIIIb-1	NM_001112545		Verza et al.,2005
						ZmSSIIIb-2	NM_001112546		Vega-Arreguin et al., 2009
						ZmSSIV	NM_001130118		Gardiner et al., 2004
						ZmSSIV	KP192927		Liu et al., 2015
Starch Branching enzyme	ArathBE1	At3g20440	be1a	Dumez et al., 2006		ZmBEI	NM_001111900	sbe1	Fisher et al., 1995
	ArathBE2	At5g03650	be2	Dumez et al., 2006		ZmBEIIa	ZMU65948		Gao et al., 1997
	ArathBE3	At2g36390	be3	Dumez et al., 2006		ZmBEIIb	NM_001111846	ae1	Fisher et al.,1993
						ZmBEIII	NM_001114649		Schnable et al., 2009
Starch Debranching Enzymes	ArathISA1	At2g39930	isa1	Delatte et al., 2005		ZmISA1	EU970890	sugary1	James et al., 1995
	ArathISA2	At1g03310	isa2	Zeeman et al., 1998b		ZmISA2	NM_001112196	sugary4	Dinges et al., 2003
	ArathISA3	At4g09020	isa3	Delatte et al., 2005		ZmISA3	NM_001111728		Dinges et al., 2003
						ZmPUL	NM_001111450	zpu1	Beatty et al., 1999
Starch phosphorylase						ZmPHOL	EU857640	shrunken4	Yu et al., 2001
						ZmPHOH	NM_001158153		Schnable et al., 2009

## Sheet: Table S2
Table S2. Primer sequence information used in the experiments
Primer Classification	Primer Name	Primer Sequence
Primers for gene cloning of screening transcription factor	SORBI_3002G192600F	5'-AGCAAGAGAACCATGGAAGAGC-3'
	SORBI_3002G192600R	5'-TTAGTACTTCCATATGTCATCCCTCTC-3'
	SORBI_3003G105600F	5'-AGTGCACCACAACAACTCGTCC-3'
	SORBI_3003G105600R	5'-CATCACATACCAACTAGCACTACCG-3'
	SORBI_3005G056300F	5'-CACATCCATGAATTTCTCTAAGCC-3'
	SORBI_3005G056300R	5'-AATTACTTCCCTGCCTCATTCG-3'
	SORBI_3009G086800F	5'-AGAACTATGGCGGACCAGCAA-3'
	SORBI_3009G086800R	5'-CTTATTTCACAAAACGCAATGGA-3'
Real-time PCR primer for screening transcription factor	SORBI_3002G192600QF	5'-GGATGAGTGGGTGGTCTGTCG-3'
	SORBI_3002G192600QR	5'-CATGTGGCGAAGTCTCGTAGGA-3'
	SORBI_3005G056300QF	5'-AGTGGCAATCACAAAGGAAAAG-3'
	SORBI_3005G056300QR	5'-TGCAACAGACAACCCAGGAG-3'
	SORBI_3003G105600QF	5'-CAGCAATCCGATAATCGCGTC-3'
	SORBI_3003G105600QR	5'-AGCGGCATTAGCCTGGTCATC-3'
	SORBI_3009G086800QF	5'-TATGGCGGACCAGCAACAGC-3'
	SORBI_3009G086800QR	5'-CGATGGCACAGATGAAGTCCC-3'
	SORBI_3003G412200QF	5'-CAGCCCTACTGGACAACAAGC-3'
	SORBI_3003G412200QR	5'-GCTACATTGCGTTGTGGAGAC-3'
	SORBI_3004G171500QF	5'-GTGACTGGAATAGGCGGTGAGA-3'
	SORBI_3004G171500QR	5'-TGCAGTGGCGTAGCTTGAGAC-3'
	SORBI_3002G054800QF	5'-GTGGAGGTGGACCACGGAAC-3'
	SORBI_3002G054800QR	5'-GCACCAGATTCTTGCTACCTCCT-3'
	SORBI_3002G055000QF	5'-TGTTTGGTAAGGCGTGGTATCC-3'
	SORBI_3002G055000QR	5'-ATGGGTTTTATCGTGACGCTATG-3'
	SORBI_3005G001500QF	5'-GGTTTATTCCCCAATGTGCTCC-3'
	SORBI_3005G001500QR	5'-ATTGTCCCACTCTCTCCCGC-3'
	SORBI_3008G071900QF	5'-ATGCAAACATCAGGCAGAACAC-3'
	SORBI_3008G071900QR	5'-GGAAGAGCAAAGAGGGGATACC-3'
	SORBI_3005G019800QF	5'-ATTCCCACAACTCCTTCCATTC-3'
	SORBI_3005G019800QR	5'-CTTGCTGAGGACCCATAGGAAC-3'
	SORBI_3003G350900QF	5'-CTTTTGCTGAGTCATTGGTGTG-3'
	SORBI_3003G350900QR	5'-GCGAAGAAAAATGATCAACAAG-3'
	SbEIF4αQF	5'-CAACTTTGTCACCCGCGATGA-3'
	SbEIF4αQR	5'-TCCAGAAACCTTAGCAGCCCA-3'
Primers for sub-celluar location	SORBI_3005G056300-eGFPF	5'-ATTTGGAGAGGACAGGGTACCATGAATTTCTCTAAGCCCACAG-3'
	SORBI_3005G056300-eGFPR	5'-GGTACTAGTGTCGACTCTAGACTTCCCTGCCTCATTCGTAT-3'
	SORBI_3002G192600-eGFPF	5'-ATTTGGAGAGGACAGGGTACCATGGAAGAGCAGCAACAACAG-3'
	SORBI_3002G192600-eGFPR	5'-GGTACTAGTGTCGACTCTAGAGTACTTCCATATGTCATCCCTC-3'
	SORBI_3003G105600-eGFPF	5'-ATTTGGAGAGGACAGGGTACCATGGCAGAGCACCACCAGCC-3'
	SORBI_3003G105600-eGFPR	5'-GGTACTAGTGTCGACTCTAGAATACTTATACTTCCATATGCCA-3'
	SORBI_3009G086800-eGFPF	5'-ATTTGGAGAGGACAGGGTACCATGGCGGACCAGCAACAGCC-3'
	SORBI_3009G086800-eGFPR	5'-GGTACTAGTGTCGACTCTAGAGTACTTGTACTTCCATATGCC-3'
Primers for plant expression vector (pBI221) construction	SORBI_3002G192600-221F	5'-CAGGTCGACTCTAGAGGATCCATGGAAGAGCAGCAACAACA-3'
	SORBI_3002G192600-221R	5'-CGATCGGGGAAATTCGAGCTCTTAGTACTTCCATATGTCATC-3'
	SORBI_3003G105600-221F	5'-CAGGTCGACTCTAGAGGATCCATGGCAGAGCACCACCAGCC-3'
	SORBI_3003G105600-221R	5'-CGATCGGGGAAATTCGAGCTCTCAATACTTATACTTCCATATG-3'
	SORBI_3005G056300-221F	5'-CAGGTCGACTCTAGAGGATCCATGAATTTCTCTAAGCCCACA-3'
	SORBI_3005G056300-221R	5'-CGATCGGGGAAATTCGAGCTCTTACTTCCCTGCCTCATTCGT-3'
	SORBI_3009G086800-221F	5'-CAGGTCGACTCTAGAGGATCCATGGCGGACCAGCAACAGCC-3'
	SORBI_3009G086800-221R	5'-CGATCGGGGAAATTCGAGCTCTCAGTACTTGTACTTCCATATG-3'
Primers for plantprokaryotic expression vector (pET32a) construction	SORBI_3003G105600-32aF	5'-GCCATGGCTGATATCGGATCCATGGCAGAGCACCACCAGCC-3'
	SORBI_3003G105600-32aR	5'-CTCGAGTGCGGCCGCAAGCTTTCAATACTTATACTTCCATATG-3'
	SORBI_3005G056300-32aF	5'-GCCATGGCTGATATCGGATCCATGAATTTCTCTAAGCCCACAG-3'
	SORBI_3005G056300-32aR	5'-CTCGAGTGCGGCCGCAAGCTTTTACTTCCCTGCCTCATTCG-3'
	SORBI_3009G086800-32aF	5'-GCCATGGCTGATATCGGATCCATGGCGGACCAGCAACAGCC-3'
	SORBI_3009G086800-32aR	5'-CTCGAGTGCGGCCGCAAGCTTTCAGTACTTGTACTTCCATATG-3'
Primers for promter (SbGBSSI and SbBt1) cloning	pSbGBSSIF	5'-CATTAGCGTCATTGTTCAGTGGG-3'
	pSbGBSSIR	5'-AGCTGCGACGTGGCTAGAGTC-3'
	pSbBt1F	5'-ACAGAGGTCCCCTGGATGCTA-3'
	pSbBt1R	5'-TCCTGGTCACCATCGTCGTC-3'
Primers for plant expression vector (pGreenII0800) construction	pSbGBSSI-pGF	5'-GTCGACGGTATCGATAAGCTTTCTTGTACAACCAACGATCGTG-3'
	pSbGBSSI-pGR	5'-CGCTCTAGAACTAGTGGATCCGCTGATGCCTGCAGTTGGAA-3'
	pSbBt1-pGF	5'-GTCGACGGTATCGATAAGCTTTGCTATTAAGCCTTCCACAGC-3'
	pSbBt1-pGR	5'-CGCTCTAGAACTAGTGGATCCGGGTCAATTCAGAGCAAGTCC-3'

## Sheet: Table S3
Table S3. Sorghum tissues in RNA-sequencing of BTx623
Organ group	Tissue designation	Tissue description and Growth stage	Details of tissue collection	Picture shown in Supplementary Figure 2
Root	Root	Root of Five-leaf stage	This tissue was collected from field-grown plant. The same parts of three independent plants were mixed as a sample.	Yes
Leaf	L_FLS	Leaf of Five-leaf stage		Yes
	L_JS	Leaf of Jointing stage		Yes
	L_HS	Leaf of Heading stage		Yes
	L_15DAP	Leaf of 15th day after pollination		Yes
Leaf Vein	LV_HS	Leaf Vein of Heading stage		Yes
	LV_15DAP	Leaf Vein of 15th day after pollination		Yes
Leaf Sheath	LS_HS	Leaf Sheath of Heading stage		Yes
	LS_15DAP	Leaf Sheath of 15th day after pollination		Yes
Stem	S_JS	Stem of Jointing stage		Yes
	S_HS	Stem of Heading stage		Yes
	S_15DAP	Stem of 15th day after pollination		Yes
Inflorescence	PInf	Primary Inflorescence		Yes
	Inf_HS	Heading stage Inflorescence		Yes
Seed	Se_5DAP	Whole seed 5th day after pollination		Yes
	Se_10DAP	Whole seed 10th day after pollination		Yes
	Se_15DAP	Whole seed 15th day after pollination		Yes
	Se_20DAP	Whole seed 20th day after pollination		Yes
	Se_25DAP	Whole seed 25th day after pollination		Yes
Endosperm	En_15DAP	Endosperm 15th day after pollination		Yes

## Sheet: Table S4
Table S4. Quality detection of sequencing results of samples
sample	library	raw_reads	clean_reads	clean_bases	error_rate	Q20	Q30	GC_pct
Root	FRAS202153190-1r	45544656	44480222	6.67G	0.03	97.67	93.67	54.37
L_FLS	FRAS202153191-1r	45527332	44503196	6.68G	0.03	97.9	94.18	53.98
L_HS	FRAS202153197-1r	46182778	44682594	6.7G	0.03	97.94	94.23	52.65
L_JS	FRAS202153192-1r	44746806	43628202	6.54G	0.03	97.78	93.9	54.64
L_15DAP	FRAS202153203-1r	45455582	44436722	6.67G	0.03	97.51	93.24	54.01
LS_HS	FRAS202153195-1b	46708740	45779348	6.87G	0.02	98.35	94.98	53.29
LS_15DAP	FRAS202153204-1r	45446154	43624438	6.54G	0.02	98	94.28	51.47
LV_HS	FRAS202153196-1r	45997524	44988370	6.75G	0.03	97.68	93.65	52.78
LV_15DAP	FRAS202153206-1r	44391636	43374018	6.51G	0.03	97.64	93.59	52.79
S_JS	FRAS202153193-1r	44888706	43852320	6.58G	0.03	97.59	93.35	54.74
S_HS	FRAS202153198-1r	45441814	43720430	6.56G	0.03	97.95	94.22	52.99
S_15DAP	FRAS202153205-1r	45948858	44942714	6.74G	0.03	97.52	93.3	52.92
PInf	FRAS202153194-1r	46157998	44947966	6.74G	0.03	97.82	93.96	51.52
Inf_HS	FRAS202153199-1r	47497014	46285852	6.94G	0.03	97.78	93.72	53.33
Se_5DAP	FRAS202153200-1r	45620886	44415084	6.66G	0.03	97.58	93.41	52.88
Se_10DAP	FRAS202153201-1r	45946112	44733592	6.71G	0.03	97.95	94.23	53.84
Se_15DAP	FRAS202153202-1r	45891406	44793352	6.72G	0.03	97.82	93.98	53.86
Se_20DAP	FRAS202153208-1r	46029960	44829464	6.72G	0.03	97.95	94.22	54.07
Se_25DAP	FRAS202153209-1r	45623384	44046058	6.61G	0.03	97.51	93.33	54.52
En_15DAP	FRAS202153207-1r	44000746	42855010	6.43G	0.03	97.71	93.75	53.84

## Sheet: Table S5
Table S5. The matching analysis of reads among different tissues
sample	total_reads	total_map	unique_map	multi_map	read1_map	read2_map	positive_map	negative_map	splice_map	unsplice_map	proper_map	exon	intron	intergenic
Root	44480222	43447720(97.68%)	42328085(95.16%)	1119635(2.52%)	21247885(47.77%)	21080200(47.39%)	21164503(47.58%)	21163582(47.58%)	16419207(36.91%)	25908878(58.25%)	41470564(93.23%)	6199975405(95.2578%)	145833695(2.2406%)	162814383(2.5015%)
L_FLS	44503196	43547209(97.85%)	42620930(95.77%)	926279(2.08%)	21358719(47.99%)	21262211(47.78%)	21297801(47.86%)	21323129(47.91%)	15513559(34.86%)	27107371(60.91%)	41834468(94.0%)	6047970518(92.7076%)	255307097(3.9135%)	220428914(3.3789%)
L_HS	44682594	43614539(97.61%)	42546610(95.22%)	1067929(2.39%)	21307617(47.69%)	21238993(47.53%)	21261494(47.58%)	21285116(47.64%)	16017958(35.85%)	26528652(59.37%)	41735870(93.41%)	5977672243(91.4932%)	287205941(4.3959%)	268580839(4.1109%)
L_JS	43628202	42609175(97.66%)	41830278(95.88%)	778897(1.79%)	20979036(48.09%)	20851242(47.79%)	20906423(47.92%)	20923855(47.96%)	14769460(33.85%)	27060818(62.03%)	41053392(94.1%)	5953253967(93.2626%)	228412131(3.5783%)	201663579(3.1592%)
L_15DAP	44436722	43398376(97.66%)	42424164(95.47%)	974212(2.19%)	21339597(48.02%)	21084567(47.45%)	21200662(47.71%)	21223502(47.76%)	14677337(33.03%)	27746827(62.44%)	41581648(93.57%)	6031961253(92.7752%)	234662187(3.6092%)	235075661(3.6156%)
LS_HS	45779348	44905194(98.09%)	43952582(96.01%)	952612(2.08%)	22034727(48.13%)	21917855(47.88%)	21963253(47.98%)	21989329(48.03%)	14299814(31.24%)	29652768(64.77%)	43196494(94.36%)	6134426339(91.1833%)	285679052(4.2464%)	307467729(4.5703%)
LS_15DAP	43624438	42762900(98.03%)	41762985(95.73%)	999915(2.29%)	20922558(47.96%)	20840427(47.77%)	20869901(47.84%)	20893084(47.89%)	14233472(32.63%)	27529513(63.11%)	40965704(93.91%)	5949904043(92.8831%)	221096386(3.4515%)	234800434(3.6654%)
LV_HS	44988370	43869580(97.51%)	42835143(95.21%)	1034437(2.3%)	21497578(47.78%)	21337565(47.43%)	21402868(47.57%)	21432275(47.64%)	16071141(35.72%)	26764002(59.49%)	41974108(93.3%)	6071580909(92.3828%)	238820615(3.6338%)	261803012(3.9835%)
LV_15DAP	43374018	42385053(97.72%)	41482415(95.64%)	902638(2.08%)	20822824(48.01%)	20659591(47.63%)	20729513(47.79%)	20752902(47.85%)	13694709(31.57%)	27787706(64.07%)	40654280(93.73%)	5834660678(91.8889%)	257032889(4.048%)	257995753(4.0631%)
S_JS	43852320	42824768(97.66%)	41906481(95.56%)	918287(2.09%)	21041962(47.98%)	20864519(47.58%)	20947423(47.77%)	20959058(47.79%)	13753942(31.36%)	28152539(64.2%)	41116190(93.76%)	5917236993(92.227%)	208219426(3.2453%)	290492838(4.5277%)
S_HS	43720430	42851281(98.01%)	41907883(95.85%)	943398(2.16%)	20991292(48.01%)	20916591(47.84%)	20941689(47.9%)	20966194(47.96%)	14318108(32.75%)	27589775(63.1%)	41096004(94.0%)	5801346182(90.3827%)	295620514(4.6056%)	321684283(5.0117%)
S_15DAP	44942714	43911227(97.7%)	42964166(95.6%)	947061(2.11%)	21608051(48.08%)	21356115(47.52%)	21467782(47.77%)	21496384(47.83%)	15703031(34.94%)	27261135(60.66%)	42103464(93.68%)	6048314518(91.9392%)	234392999(3.563%)	295890748(4.4978%)
PInf	44947966	43960739(97.8%)	42822607(95.27%)	1138132(2.53%)	21463947(47.75%)	21358660(47.52%)	21402720(47.62%)	21419887(47.65%)	16581613(36.89%)	26240994(58.38%)	41994588(93.43%)	5961293649(90.5139%)	307731652(4.6725%)	317026956(4.8136%)
Inf_HS	46285852	45272651(97.81%)	44024514(95.11%)	1248137(2.7%)	22068618(47.68%)	21955896(47.44%)	22002374(47.54%)	22022140(47.58%)	15410042(33.29%)	28614472(61.82%)	43166228(93.26%)	6227397104(91.8381%)	213591942(3.1499%)	339852468(5.012%)
Se_5DAP	44415084	43269136(97.42%)	42358093(95.37%)	911043(2.05%)	21273399(47.9%)	21084694(47.47%)	21168664(47.66%)	21189429(47.71%)	14177198(31.92%)	28180895(63.45%)	41496036(93.43%)	5912558585(91.2255%)	275790950(4.2552%)	292909010(4.5193%)
Se_10DAP	44733592	43700268(97.69%)	42586296(95.2%)	1113972(2.49%)	21341703(47.71%)	21244593(47.49%)	21283122(47.58%)	21303174(47.62%)	17388139(38.87%)	25198157(56.33%)	41833392(93.52%)	6176114242(94.3412%)	149291175(2.2804%)	221170664(3.3784%)
Se_15DAP	44793352	43240011(96.53%)	40782803(91.05%)	2457208(5.49%)	20453474(45.66%)	20329329(45.38%)	20283964(45.28%)	20498839(45.76%)	13213693(29.5%)	27569110(61.55%)	39749178(88.74%)	6128684845(94.6147%)	145525875(2.2466%)	203308388(3.1387%)
Se_20DAP	44829464	43255024(96.49%)	40536431(90.42%)	2718593(6.06%)	20320792(45.33%)	20215639(45.09%)	20140743(44.93%)	20395688(45.5%)	13417440(29.93%)	27118991(60.49%)	39435674(87.97%)	6175679950(95.3121%)	107016036(1.6516%)	196731991(3.0363%)
Se_25DAP	44046058	42010820(95.38%)	39113898(88.8%)	2896922(6.58%)	19661421(44.64%)	19452477(44.16%)	19420268(44.09%)	19693630(44.71%)	11500449(26.11%)	27613449(62.69%)	37852100(85.94%)	5964063193(94.7885%)	132249251(2.1019%)	195660317(3.1097%)
En_15DAP	42855010	40583167(94.7%)	36412222(84.97%)	4170945(9.73%)	18266181(42.62%)	18146041(42.34%)	17992810(41.99%)	18419412(42.98%)	9802542(22.87%)	26609680(62.09%)	35065082(81.82%)	5847157059(96.1951%)	81997930(1.349%)	149275281(2.4558%)

## Sheet: Table S6
Table S6. FPKM values of all genes among the sorghum tissues based on RNA-sequencing
gene_id	Root	L_FLS	L_JS	S_JS	PInf	LS_HS	LV_HS	L_HS	S_HS	Inf_HS	Se_5DAP	Se_10DAP	Se_15DAP	L_15DAP	LS_15DAP	S_15DAP	LV_15DAP	En_15DAP	Se_20DAP	Se_25DAP	gene_name	gene_chr	gene_start	gene_end	gene_strand	gene_length	gene_biotype	gene_description	tf_family
SORBI_3K044505	0	0	0	0	0	0	0	0	0	0	0	0	0.0648785	0	0	0	0	0	0.558763	0	-	super_20	463424	465219	+	1712	protein_coding	hypothetical protein	-
SORBI_3K044420	0	0	0	0	0	0	0	0	0	1.08019	0	0	0	0	0	0	0	0	0	0	-	super_862	1218	5487	+	672	protein_coding	hypothetical protein	-
SORBI_3K044419	0	0	0	0	0	0	0	0	0	0	0	0	0	0	0	0	0	0	0	0	-	super_814	3653	5536	-	1824	protein_coding	hypothetical protein	-
SORBI_3K044418	0	0	0	0	0	0	0	0	0	0	0	0	0	0.0359989	0	0	0	0	0	0	-	super_527	7205	8497	-	1293	protein_coding	hypothetical protein	-
SORBI_3K044417	0	0	0	0	0	0	0	0	0	0	0	0	0	0	0	0.0241882	0	0	0	0	-	super_49	124535	126367	+	1749	protein_coding	hypothetical protein	-
SORBI_3K044416	0	0	0	0	0	0	0	0	0	0	0	0	0	0	0	0	0	0	0	0	-	super_368	2443	4340	+	1794	protein_coding	hypothetical protein	-
SORBI_3K044415	0	0	0	0	0	0	0	0	0	0	0.0737819	0.633785	0.820152	0	0	0	0	0	0.252268	1.92851	-	super_314	4875	5451	+	474	protein_coding	hypothetical protein	-
SORBI_3K044414	0.258435	0	0.591151	0.0919309	0.221876	0.0633729	0.0407968	0.0450307	0	0.0220441	1.28191	0	0.229369	0	0	0	0	0	0.0308661	0.539341	-	super_3113	14	2296	-	1937	protein_coding	hypothetical protein	B3
SORBI_3K044413	0.27822	0.383396	0.220296	0.321649	0.813053	0.341124	0.312931	0.345408	0.823302	0.44497	0.524808	0.339896	0.277796	0.271635	0.559626	0.670111	0.436094	0.19747	0.373828	0.544343	-	super_3056	21	2419	+	2399	protein_coding	hypothetical protein	-
SORBI_3K044412	0	0	0	0	0.0915777	0	0	0	0	0	0	0	0	0	0	0	0	0	0	0	-	super_2983	234	955	-	722	protein_coding	hypothetical protein	-
SORBI_3K044411	0	0	0.0994148	0	0	0	0	0.0492238	0	0	0	0.0484383	0	0.105071	0	0	0	0	0	0.147391	-	super_2942	281	1166	+	886	protein_coding	hypothetical protein	-
SORBI_3K044410	0	0	0	0	0	0	0	0	0	0.14393	0	0	0	0	0	0	0	0	0	0	-	super_2779	454	2716	-	1780	protein_coding	hypothetical protein	-
SORBI_3K044409	0	0	0	0	0	0	0	0	0	0	0	0	0	0	0	0	0	0	0	0	-	super_267	8799	10727	-	1836	protein_coding	hypothetical protein	-
SORBI_3K044408	0.535608	0	0	0.175872	0.0244886	0.0303095	0	0	0.0332509	0.0948875	0.155434	0.0317899	0.0822756	0	0	0	0	0	0	0	-	super_2276	652	2119	-	1350	protein_coding	hypothetical protein	-
SORBI_3K044407	0	0.0179211	0	0	0.0109505	0.0135534	0	0.0144459	0.0148687	0.0141435	0	0.0142154	0.036791	0	0	0.014013	0.0150667	0.0392292	0	0.0216277	-	super_2229	40	3058	-	3019	protein_coding	hypothetical protein	TBC
SORBI_3K044406	0.0379147	0	0	0	0	0	0	0	0	0	0	0	0	0	0	0	0	0	0	0	-	super_2035	9	3519	-	1467	protein_coding	hypothetical protein	-
SORBI_3K044405	0	0	0	0	0	0	0	0	0	0	0	0	0	0	0	0	0	0	0	0	-	super_20	188989	191000	-	1926	protein_coding	hypothetical protein	hATC
SORBI_3K044404	8.65213	14.6682	39.1474	21.6322	31.1494	33.4616	29.6777	27.718	27.5317	39.2834	32.3302	21.5535	25.9168	17.5842	25.1934	22.5628	30.3243	23.1602	12.489	23.5058	-	super_1713	3028	3789	-	225	protein_coding	hypothetical protein	-
SORBI_3K044403	0	0	0	0	0	0	0	0	0	0	0	0	0	0	0	0	0	0	0	0	-	super_16	127202	128581	-	1380	protein_coding	hypothetical protein	-
SORBI_3K044402	0.128257	0	0	0	0	0	0	0	0	0	0	0	0	0	0	0	0	0	0	0	-	super_154	1902	7240	-	1301	protein_coding	hypothetical protein	-
SORBI_3K044401	0	0	0.147912	0	0.0277578	0	0	0	0.0753798	0	0	0.252237	0.0466298	0.0781638	0.0417496	0.0355207	0.114575	0.0994398	0.250997	0.109646	-	super_1265	3699	4889	+	1191	protein_coding	hypothetical protein	-
SORBI_3K044400	1.48439	0	0	0.745453	0	0.12847	0.0620278	0.0684651	0	0.067032	0.109804	0.0673725	0	0	0.312237	0.398479	0.0714073	0	0.0938581	0	-	super_1068	1	637	+	637	protein_coding	hypothetical protein	-
SORBI_3K044300	0.689953	1.88434	4.49653	4.21954	1.15141	8.58961	1.50808	0.603414	0.599658	0.142603	0.901012	1.28995	0.582916	1.44348	1.70807	0.544962	2.06165	0.621546	0.37082	0.685338	-	super_99	49196	52385	-	2096	protein_coding	hypothetical protein	-
SORBI_3K044200	0.341494	4.11074	0.878787	0.501093	1.16711	0.502444	0.879385	1.50618	0.964607	0.557091	1.26148	2.00913	1.87535	0.821619	0.190805	0.454545	0.139636	3.81748	2.66131	1.00221	-	super_99	48032	49334	+	1303	protein_coding	hypothetical protein	-
SORBI_3K043800	0.104159	0	0	0.0555774	0	0	0.18498	0	0	0	0	0	0	0	0	0	0	0	0	0	-	super_896	5277	6567	-	1068	protein_coding	hypothetical protein	p450
SORBI_3K043500	0	0	0	0	0	0	0	0	0	0	0.122282	18.1069	46.28	0	0	0	0	191.591	72.2608	59.3582	-	super_88	64035	64892	-	858	protein_coding	hypothetical protein	Myb_DNA-binding
SORBI_3K043400	52.3258	9.77589	16.8545	23.9818	17.0194	13.4049	12.8975	15.8379	7.36621	27.2689	16.2225	14.0597	14.4762	9.15489	18.0278	23.5836	12.6381	26.5913	28.7604	14.8536	-	super_88	3307	7917	+	1688	protein_coding	DnaJ protein P58IPK homolog [Source:Projected from Arabidopsis thaliana (AT5G03160) UniProtKB/Swiss-Prot;Acc:Q9LYW9]	DnaJ
SORBI_3K042700	0	0	0	0	0	0	0	0	0	0	0	0	0	0	0	0	0	0	0	0	-	super_836	1660	2403	+	744	protein_coding	hypothetical protein	SRF-TF
SORBI_3K042600	0	0	0	0	0	0	0	0	0	0	0	0	0	0	0	0	0	0	0	0	-	super_826	310	1254	+	945	protein_coding	hypothetical protein	-
SORBI_3K042000	4.81485	22.3615	11.3581	7.25759	7.19277	18.6668	17.7513	17.4651	20.5475	8.48942	6.84539	4.58597	6.7191	14.8978	11.0355	14.4857	11.5673	9.49166	5.71307	8.03386	-	super_73	16072	31920	+	3893	protein_coding	hypothetical protein	-
SORBI_3K041900	73.9131	6.86101	3.01952	53.2688	17.4604	31.6805	12.675	8.20465	16.5017	14.4354	14.143	20.896	21.9791	5.05941	36.8632	20.2093	9.15307	17.3622	13.6638	11.9742	-	super_73	7456	14272	+	3588	protein_coding	hypothetical protein	-
SORBI_3K040800	0.0522752	0.101699	0.0827834	0	0.217497	0	0	0	0	0.0802619	0.032869	0.0403349	0	0	0	0	0	0	0	0	-	super_640	6780	9026	+	1064	protein_coding	hypothetical protein	-
SORBI_3K033000	25.3233	8.79739	2.14833	7.80163	6.40585	1.94054	7.87022	6.0868	2.43299	3.70292	4.02801	11.3397	11.6641	8.82996	5.65962	6.47762	7.02636	32.5771	15.8785	8.582	-	super_541	124	2100	-	738	protein_coding	hypothetical protein	-
SORBI_3K032900	0.382838	0	0.0866092	0.116729	0.162535	0	0.194256	0.12865	0.0441383	0.125957	0.034388	0.548586	0.109215	0.137305	0.293356	0.083196	0.0894522	0	0.235153	0	-	super_525	17	1664	-	1017	protein_coding	hypothetical protein	GTP_EFTU
SORBI_3K031800	3.14464	18.5126	20.2826	4.43952	6.36659	5.0605	7.77203	9.37484	5.68378	8.67566	8.85643	8.92194	7.22819	6.5516	2.84052	4.2355	4.42006	10.0438	7.49986	6.49864	-	super_466	1	3912	-	1698	protein_coding	hypothetical protein	-
SORBI_3K031500	0.415598	0.134755	0.274226	6.43092	8.27518	1.19747	1.50076	0.84183	7.18331	4.65279	1.63322	0.881842	0.553286	0.811521	1.5171	3.2664	1.16124	0.36872	0.521187	1.17903	-	super_444	170	1952	+	1606	protein_coding	hypothetical protein	-
SORBI_3K031300	0	0	0	0	0.034545	0	0.041287	0.0455718	0	0	0	0	0	0	0.155874	0	0	0	0	0.0682278	-	super_41	159357	160313	+	957	protein_coding	hypothetical protein	-
SORBI_3K031200	0	0	0	0	0	0	0	0	0	0	0	0	0	0	0	0	0	0	0	0	-	super_400	7117	11467	-	528	protein_coding	hypothetical protein	-
SORBI_3K031100	0	0	0	0	0	0	0	0	0	0	0	0	0	0	0	0	0	0	0	0	-	super_400	5416	6065	-	604	protein_coding	hypothetical protein	-
SORBI_3K030700	0	0	0	0	0.0338032	0	0	0	0	0.0436599	0	0	0	0	0.152527	0	0	0	0	0	-	super_3299	24	1001	-	978	protein_coding	hypothetical protein	-
SORBI_3K030200	0	0	0	0	0	0	0	0	0	0	0	0	0	0	0	0	0	0	0	0	-	super_3270	592	1337	-	624	protein_coding	hypothetical protein	-
SORBI_3K030100	0	0	0	0	0.248568	0.358928	0.14854	0	0.281257	0	0	0	0	0	0	0	0	0	0.0749218	0	-	super_3268	152	1565	-	798	protein_coding	hypothetical protein	-
SORBI_3K030000	0	0	0.206039	0	0	0	0	0.102017	0	0	0	0	0	0.0544404	0	0	0.0532005	0	0	0	-	super_3247	63	1318	+	855	protein_coding	hypothetical protein	Cytochrom_B561
SORBI_3K029900	0	3.25396	1.16724	0	0	0	2.57773	4.93472	0	0	0.10695	0	0	16.1798	0.0506868	0	6.2596	0	0	0	-	super_3219	3	983	-	981	protein_coding	hypothetical protein	-
SORBI_3K028900	0	0	0	0	0	0	0	0	0	0.179498	0.0259441	0	0	0	0	0	0	0	0	0	-	super_31	56726	60769	-	4044	protein_coding	hypothetical protein	-
SORBI_3K028600	14.6183	10.1271	10.7279	8.14252	13.7324	16.7343	14.2343	14.146	15.4808	17.7914	10.0434	11.6644	12.8872	11.756	17.2758	13.8305	11.1967	14.5764	8.20163	11.4683	-	super_3040	574	2458	+	780	protein_coding	hypothetical protein	-
SORBI_3K028300	0	0	0	0	0	0	0	0	0	0	0	0	0	0	0	0	0	0	0	0	-	super_297	558	2069	+	1512	protein_coding	hypothetical protein	p450
SORBI_3K028200	0.227605	5.25818	4.5505	3.46121	14.6274	9.35562	4.60801	4.26084	6.75052	0.655233	0.679774	0.0878083	0.0852215	2.45232	5.46835	11.3391	6.56122	0	0	0.233789	-	super_2967	539	2595	-	1955	protein_coding	hypothetical protein	p450
SORBI_3K028000	0	0.030846	0	0	0.0376962	0	0	0.0248645	0	0.048688	0	0	0	0	0	0	0	0	0	0	-	super_2910	279	3580	-	1754	protein_coding	hypothetical protein	-
SORBI_3K027900	0	0	0.0950178	0	0	0.04414	0.0426232	0	0	0	0	0	0	0	0.160918	0.228183	0.196274	0	0	0	-	super_2853	28	994	+	927	protein_coding	hypothetical protein	Pkinase_Tyr
SORBI_3K027700	0	0	0	0	0	0	0	0	0	0	0.126712	361.523	600.634	0	0	0	0	118.433	665.245	309.2	-	super_2843	2351	2626	-	276	protein_coding	hypothetical protein	-
SORBI_3K026900	33.4227	0	0	0	0	0	0	0	0	0	0	0.221361	0.0358066	0	0	0	0	0	0.192739	0	-	super_2674	1128	2880	+	1551	protein_coding	hypothetical protein	-
SORBI_3K026800	0.444967	0.577109	0	0	0	0.763798	0.526823	0.465197	0	0.113865	0.186521	0.114443	0	0.248248	0	0.225628	0.485189	0.315821	0	0	-	super_2635	42	416	-	375	protein_coding	hypothetical protein	GTP_EFTU
SORBI_3K026400	0	0	0	0	0	0	0	0	0	0	0	0	0	0	0	0	0	0	0	0	-	super_2600	18	2362	+	1929	protein_coding	hypothetical protein	-
SORBI_3K026200	0	0	0	0	0	0	0	0	0	0	0	0	0	0	0.263089	0.223837	0.240669	0	0	0	-	super_2540	648	836	-	189	protein_coding	hypothetical protein	-
SORBI_3K025900	0	0	0	0	0	0	0	0	0	0	0	0	0	0	0	0	0	0	0	0	-	super_2454	403	1848	-	1446	protein_coding	hypothetical protein	-
SORBI_3K025800	2.07928	2.17427	0.576234	1.22042	2.10098	1.83556	2.80644	2.28251	3.98544	1.3568	1.86303	0.962609	1.50518	2.13157	3.76414	3.87468	3.61341	0.44274	1.67629	2.13579	-	super_2410	27	1096	+	1070	protein_coding	hypothetical protein	-
SORBI_3K024800	0	0.0423348	0	0.09289	0.0776046	0	0	0	0.0351242	0.0334111	0	0	0	0	0	0	0	0	0	0	-	super_229	546	1823	-	1278	protein_coding	hypothetical protein	DUF295
SORBI_3K024600	0	0	0	0	0	0	0	0	0	0	0	0	0	0	0	0	0	0	0	0	-	super_2273	101	892	-	792	protein_coding	hypothetical protein	HLH
SORBI_3K024500	0	0	0	0	0	0	0	0	0	0	0	0	0	0	0	0	0	0	0	0	-	super_2250	1656	2909	+	1158	protein_coding	hypothetical protein	HLH
SORBI_3K024300	0	0	0	0	0	0	0	0	0	0	0	0	0	0	0	0	0	0	0	0	-	super_2174	2977	3231	+	255	protein_coding	hypothetical protein	-
SORBI_3K024100	0	0	0	0	0	0	0	0	0	0	0	0	0	0	0	0	0	0	0	0	-	super_2071	1098	2857	-	264	protein_coding	hypothetical protein	-
SORBI_3K024000	0	0.0251296	0.122733	0	0	0	0.238575	0.344361	0.166795	0.356985	0.0812183	0.0199333	0.0257947	0.151336	0.230951	0.157195	0.021127	0.110017	0.0555389	0.030327	-	super_2002	558	3506	+	2153	protein_coding	hypothetical protein	GTP_EFTU
SORBI_3K020500	0	0	0	0	0	0	0	0.0177719	0	0	0	0	0.0226308	0.0189676	0.0202623	0	0	0	0	0	-	super_199	9643	13059	-	2454	protein_coding	hypothetical protein	-
SORBI_3K020400	1.85767	1.16924	0.173048	0.8163	0.45465	0.0803886	0.310504	0.342729	0.0881899	0.167777	0.480959	0.843149	0.545541	0.091447	0.586135	0.415571	0.536186	0.698033	1.52699	0.769674	-	super_199	7739	8247	-	509	protein_coding	hypothetical protein	-
SORBI_3K017300	0	0	0	0	0	0	0	0	0	0	0	6.68623	6.03653	0	0	0	0	0.858209	5.41554	2.83887	-	super_1828	1988	2263	+	276	protein_coding	hypothetical protein	-
SORBI_3K016900	0.637322	0.66221	1.00927	0.556469	1.7649	1.20409	0.679107	0.840444	1.13391	1.67906	0.637521	1.20702	0.4628	0.945476	0.906423	0.782205	2.33355	0.678522	0.747345	0.935201	-	super_176	6101	10775	+	3840	protein_coding	hypothetical protein	-
SORBI_3K016700	0.0833896	0	0.132056	0	0	0	0	0	0	0	0	0	0	0.0697849	0	0	0	0	0	0	-	super_1741	12	678	+	667	protein_coding	hypothetical protein	-
SORBI_3K016500	0	0	0.42758	0	0	0	0	0	0	0	0	0	0	0.150636	0	0	0	0	0	0	-	super_1717	2776	3636	-	618	protein_coding	hypothetical protein	-
SORBI_3K015800	0	0	0	0	0	0	0	0	0	0	0	0	0	0	0	0	0	0	0	0	-	super_1650	2028	2398	-	240	protein_coding	hypothetical protein	-
SORBI_3K015700	0	0	0	0	0	0	0	0	0	0	0	0	0	0	0	0	0	0	0	0	-	super_164	5308	6463	+	462	protein_coding	hypothetical protein	-
SORBI_3K014200	0	0	0	0	0	0	0	0	0	0	0	0	0	0	0	0	0	0	0	0	-	super_1445	3898	4128	-	231	protein_coding	hypothetical protein	-
SORBI_3K014100	0	0	0	0	0	0	0	0	0	0	0	0	0	0	0	0	0	0	0	0	-	super_1432	200	775	-	576	protein_coding	hypothetical protein	-
SORBI_3K013200	0.256613	2.49614	0.457171	0.376542	0.419441	0.471947	0.455729	0.326966	1.21671	0.246248	0.262194	0.321748	0.41636	0.724773	0.344109	1.51264	0.419714	0.683004	0.206877	0.376551	-	super_139	14861	17921	-	1734	protein_coding	hypothetical protein	-
SORBI_3K013100	0.414308	0.90677	2.6244	2.21068	0.492507	1.06676	0.662207	0.162429	0.501549	0.0795146	0.781511	0.719268	0.310257	14.9954	0.185191	0.393903	0.423524	11.2478	0.668018	1.33749	-	super_139	9141	10848	+	537	protein_coding	hypothetical protein	Usp
SORBI_3K013000	2.20718	2.64794	85.0523	2.82651	0.0874591	0.920109	0.888491	0.346129	0.593765	0.169442	16.3761	1.07858	0.661143	1.78552	0.59195	0.615551	25.2101	0.783286	0.237252	36.9654	-	super_139	3738	6478	-	756	protein_coding	hypothetical protein	-
SORBI_3K012900	0	0	0	0	0	0	0	0	0	0	0	0	0	0	0	0	0	0	0	0	-	super_1334	1676	2025	-	240	protein_coding	hypothetical protein	-
SORBI_3K010500	0	0	0	0	0	0	0	0	0	0	0	0	0	0	0	0	0	0	0	0	-	super_1287	1589	1930	-	342	protein_coding	hypothetical protein	-
SORBI_3K010300	0	0	0.0686706	0	0	0	0	0	0	0	0	0	0	0.0120963	0	0	0	0	0	0	-	super_1257	2	4414	-	3848	protein_coding	hypothetical protein	GATase_2
SORBI_3K010100	0	0	0	0.187442	0.243597	0	0	0	0.0157504	0	0	0	0	0.0163321	0.139576	0.0148439	0.0638406	0.0415554	0	0.0229102	-	super_120	30725	33661	-	2850	protein_coding	hypothetical protein	-
SORBI_3K010000	0	0	0	0	0	0	0	0	0	0	0	0	0	0	0	0	0	0	0	0	-	super_120	24639	29957	+	2182	protein_coding	hypothetical protein	RRM_1
SORBI_3K009900	0	0	0	0	0	0	0	0	0	0	0	0	0	0	0	0	0	0	0	0	-	super_120	20758	22309	-	336	protein_coding	Autophagy-related protein [Source:Projected from Arabidopsis thaliana (AT3G15580) UniProtKB/TrEMBL;Acc:A0A178VBL7]	-
SORBI_3K009800	0.695595	0.039036	0.423673	12.1197	0.755329	1.23993	0.123533	0	0.0647744	0.225923	0.126164	0	0.0267129	0.0111945	0.93277	0	0.371943	0	0.0287579	0.141329	-	super_120	1106	6324	-	4158	protein_coding	hypothetical protein	-
SORBI_3K008450	0.0517885	0.201504	0	0	0.246254	0.076197	0.0367893	0.0812146	0.125387	0.318058	0.0651259	0.119878	0.155129	0.0433394	0.370382	0	0	0	0	0.0607952	-	super_176	4919	5992	+	1074	protein_coding	hypothetical protein	-
SORBI_3K004500	0	0	0	2.16828	0	4.85782	0	0	0	0.389948	0.319384	0	0	0.425082	1.58935	0	0	0	0	0	-	super_1165	3309	3527	-	219	protein_coding	hypothetical protein	-
SORBI_3K004400	0	0	0	0	0	0	0	0	0	0	0	0	0	0	0	0	0	0	0	0	-	super_1165	500	1047	+	348	protein_coding	hypothetical protein	-
SORBI_3K004201	0	0	0	0	0	0	0	0	0	0	0	0.00560448	0.0072525	0	0	0	0	0	0.00390386	0	-	super_112	17564	32878	-	15315	protein_coding	hypothetical protein	-
SORBI_3K004100	34.5646	10.1552	13.5166	29.2455	21.32	16.0869	15.4589	16.5102	8.88095	14.9461	13.6608	16.41	17.5729	17.4439	18.4454	14.1911	16.1525	16.8224	17.3638	13.9945	-	super_112	5886	16466	+	1577	protein_coding	hypothetical protein	-
SORBI_3K000500	0	0	0.262147	0	0.0491958	0	0	0	0	0.190622	0.41634	0.255454	0	0	0	0	0	0	0.0889696	0	-	super_1058	168	963	+	672	protein_coding	hypothetical protein	-
SORBI_3K000400	0	0.0412692	0	0	0	0	0	0	0	0	0	0	0	0	0	0	0	0	0	0	-	super_1023	2290	3713	-	1311	protein_coding	hypothetical protein	-
SORBI_3K000200	0	0	0	0	0	0	0	0	0	0	0	0	0.193843	0	0	0	0	0	0.0521707	0.51278	-	super_101	20601	21777	+	1146	protein_coding	hypothetical protein	-
SORBI_3010G280100	24.6391	35.4365	20.8614	18.6141	19.4297	78.1266	72.0915	66.4704	54.4374	18.322	27.6099	23.6855	15.7109	43.6204	73.8951	54.6442	46.085	14.8041	18.7929	13.6506	-	10	61223540	61226724	+	1368	protein_coding	hypothetical protein	-
SORBI_3010G280000	0	0	0	0	0	0	0	0	0	0	0	0	0	0	0	0	0	0	0	0	-	10	61221939	61222829	-	891	protein_coding	hypothetical protein	-
SORBI_3010G279900	18.5556	10.8029	9.53548	15.3596	25.5	17.018	12.8105	10.069	11.9877	16.8628	17.4428	18.5129	20.9813	8.35549	9.73603	12.6647	8.45413	20.8345	17.6341	14.6961	-	10	61211445	61219938	-	3621	protein_coding	hypothetical protein	PHD
SORBI_3010G279800	3.29362	2.69902	0.788239	3.78608	4.45662	3.83312	3.46066	3.10567	3.75212	2.56912	3.07642	1.90394	1.068	2.7031	3.74917	3.80199	2.92735	0.338251	0.876551	1.23079	-	10	61201829	61210752	+	5252	protein_coding	hypothetical protein	PIP5K
SORBI_3010G279700	38.4971	30.941	25.3254	34.7768	32.8952	30.1519	36.9038	39.3338	39.0239	36.9855	43.7316	34.787	43.987	35.6674	38.1246	36.0321	27.2878	34.534	35.4887	40.4398	-	10	61194106	61197836	-	2212	protein_coding	hypothetical protein	-
SORBI_3010G279600	0	0	0	0	0	0	0	0	0	36.2921	0	0	0	0	0	0	0	0	0	0	-	10	61192817	61193729	+	913	protein_coding	hypothetical protein	-
SORBI_3010G279450	9.85144	20.5855	12.6108	10.9422	16.5947	13.9994	9.92294	10.2057	16.8465	14.0385	11.3333	8.94342	9.0509	9.94134	8.60379	15.837	8.77132	8.80383	5.8256	10.2205	-	10	61168144	61190084	+	6363	protein_coding	hypothetical protein	JmjC
SORBI_3010G279300	0.562639	2.05235	0.572785	0.428878	4.3952	1.83302	2.58368	2.04826	3.35692	1.63516	1.11185	0.852744	0.521654	1.34528	0.431131	0.703048	0.985978	0.213932	0.323993	0.401011	-	10	61162736	61165589	-	2768	protein_coding	hypothetical protein	PIP5K
SORBI_3010G279200	16.2228	16.2068	15.6722	11.096	7.33416	4.97649	9.34398	11.1486	5.40888	7.88592	10.0428	11.3574	9.06838	10.9028	5.20756	5.52635	8.81044	15.3376	14.0716	8.38234	-	10	61156697	61161836	-	888	protein_coding	hypothetical protein	-
SORBI_3010G279100	2.20757	22.2164	7.80669	2.03701	3.63053	5.11625	6.70909	7.80882	7.72926	3.7972	2.57781	3.72684	3.11572	4.77828	4.15478	4.10301	3.027	2.61535	3.1223	3.03965	-	10	61153092	61156757	+	3351	protein_coding	hypothetical protein	-
SORBI_3010G279000	204.313	18.3691	53.2761	175.191	38.1765	54.2846	42.8936	53.6288	27.9514	44.1917	41.8324	48.1814	39.3347	48.8705	76.0753	62.2206	74.5563	44.349	34.2009	31.6224	-	10	61149465	61152390	+	1402	protein_coding	hypothetical protein	-
SORBI_3010G278900	0.0420415	0.0817898	0.0665771	0	0	0	0.119461	0.131859	0	0.0645493	0.0264343	0.0648772	0	0.668469	0.225505	0	0.206288	0	0	0	-	10	61143779	61145206	-	1323	protein_coding	hypothetical protein	-
SORBI_3010G278800	50.7418	33.5039	33.8293	24.936	40.1135	26.6383	28.327	27.648	29.7768	26.4416	26.1175	34.0644	29.0715	32.2008	23.3883	31.9144	27.995	24.7086	28.3204	28.0495	-	10	61110306	61114701	-	2109	protein_coding	hypothetical protein	-
SORBI_3010G278700	10.6726	19.9396	12.3509	24.7228	11.3909	24.3657	23.0181	24.2603	18.5932	24.0085	14.0342	9.93726	9.63171	4.07926	6.51363	11.3959	4.74167	6.88309	10.4518	11.2036	-	10	61099811	61104119	-	2168	protein_coding	hypothetical protein	-
SORBI_3010G278600	43.6226	18.0871	25.2806	34.5906	31.8088	41.9597	40.9634	34.728	29.1801	32.7584	27.314	36.5624	45.7985	34.3046	46.7755	35.5954	37.842	38.9894	42.7582	42.2784	-	10	61094578	61099346	-	2749	protein_coding	hypothetical protein	-
SORBI_3010G278500	5.74227	7.43472	16.3369	3.59225	1.98899	8.23017	9.60715	8.80318	11.4898	26.9056	3.59811	4.49177	6.40572	8.45095	8.76229	5.39169	6.36389	7.4205	5.49135	13.0634	-	10	61086807	61090967	-	2809	protein_coding	hypothetical protein	-
SORBI_3010G278400	5.23769	3.53352	2.03347	3.17338	4.33831	3.05765	2.86856	2.70258	2.61805	2.45145	3.60137	5.2798	4.87543	3.66208	3.44381	2.40312	2.99835	9.60558	6.28387	3.82799	-	10	61083257	61087639	+	3292	protein_coding	hypothetical protein	-
SORBI_3010G278300	14.3461	10.6298	8.35033	9.27509	8.39728	6.11292	7.99534	7.28534	7.16106	8.97538	6.91678	14.9274	13.7252	5.67566	5.36412	8.58827	5.59101	15.6026	9.34242	7.19323	-	10	61077204	61083645	-	3059	protein_coding	hypothetical protein	-
SORBI_3010G278200	9.17887	19.7679	34.1052	27.4169	10.4514	19.2678	11.5524	14.525	14.2295	13.764	14.3124	9.6084	14.7636	19.308	34.7173	17.7207	21.8865	16.756	7.28149	11.1805	-	10	61068845	61073516	-	4672	protein_coding	hypothetical protein	-
SORBI_3010G278100	3.89031	3.73307	2.8306	2.74903	1.87483	1.70168	4.89228	1.85496	4.15793	1.6547	5.02442	3.16396	3.77939	4.44348	4.98178	4.11856	4.77221	2.46269	5.87704	3.88802	-	10	61065749	61067628	+	1058	protein_coding	hypothetical protein	-
SORBI_3010G278000	21.7324	8.93608	45.6131	9.09066	4.85359	2.79885	4.90435	6.47563	4.62816	17.0256	5.27448	3.13603	6.1892	6.16582	5.37555	1.7786	5.34242	5.96709	4.6282	8.80173	-	10	61061322	61064970	+	2997	protein_coding	hypothetical protein	-
SORBI_3010G277900	6.42146	12.6784	21.3966	5.57902	9.97462	6.26938	6.34222	8.70373	7.41723	6.35909	7.09959	5.48887	3.95664	7.97084	6.42355	6.64536	7.65266	1.77903	5.13198	5.04417	-	10	61052932	61056748	+	2330	protein_coding	hypothetical protein	-
SORBI_3010G277800	56.7439	10.3474	70.2479	79.0313	5.21017	16.2937	10.9915	15.2386	16.1629	5.29252	12.0237	5.0065	6.72787	10.1551	28.0272	10.9144	14.2352	1.59416	4.39269	10.2171	-	10	61046769	61049577	+	1783	protein_coding	hypothetical protein	-
SORBI_3010G277700	0.158496	1.76198	0.161354	0.169142	0.565236	0.408095	1.20634	1.53571	0.465972	0.547539	0.491168	0.471704	0.486068	0.568449	0.253022	0.292769	0.259235	1.22941	0.425924	0.491732	-	10	61041125	61046037	+	4913	protein_coding	hypothetical protein	IPPT
SORBI_3010G277600	2.80716	174.599	213.742	5.4689	7.58585	17.4573	51.4765	51.7767	25.2104	11.0507	10.8571	11.5854	5.47538	26.6331	7.35352	6.80259	16.7104	2.08509	7.57871	4.21499	-	10	61036977	61040301	-	1704	protein_coding	hypothetical protein	-
SORBI_3010G277550	0.140103	0.953974	1.99681	1.34562	0.749461	0.515337	0.995257	1.2084	0.339209	0.322665	0.880922	0.540508	0.139889	0.351737	0.250498	0.639373	0.687453	0.596639	0.451795	0.164469	-	10	61020953	61021349	-	397	protein_coding	hypothetical protein	-
SORBI_3010G277500	3.73261	11.4637	22.9977	11.1108	15.0507	12.0747	12.9962	14.1732	10.9731	12.8908	14.7951	9.54634	6.21153	8.47966	10.9716	7.80541	6.13758	3.36987	6.53726	7.51325	-	10	61020368	61027587	-	5588	protein_coding	hypothetical protein	-
SORBI_3010G277400	5.41322	0	0.535776	0.21663	22.1201	0.0995566	0	0	0	2.28561	6.25422	0.0522096	0.202686	0.0566259	0.0604912	0.0514661	0.0553363	0	0.145469	3.17732	-	10	61019253	61020351	+	822	protein_coding	hypothetical protein	-
SORBI_3010G277300	187.807	24.8074	4.96963	14.1686	70.7189	24.5695	30.181	39.3924	11.6204	28.4735	39.8386	63.5363	51.9064	29.0426	35.8743	18.9547	23.1206	36.7967	48.5841	44.0405	-	10	61014032	61018074	+	3917	protein_coding	hypothetical protein	FAD_binding_4
SORBI_3010G277200	11.678	8.35259	1.69976	2.8636	9.30159	5.55888	7.5333	7.03586	0.883567	5.20764	4.88618	9.35844	13.9537	4.23967	2.43725	1.63277	2.844	20.4321	12.6913	4.30925	-	10	61006321	61010262	-	2591	protein_coding	hypothetical protein	zf-CCHC
SORBI_3010G277100	30.1553	26.1396	35.8713	28.0518	12.5855	21.9769	33.1485	35.6694	18.9622	26.4441	13.9183	21.6029	19.5968	34.5959	27.9434	23.703	28.151	29.6082	24.1469	19.4065	-	10	61003949	61006320	-	2372	protein_coding	hypothetical protein	-
SORBI_3010G277000	15.2906	10.7143	1.46261	4.30756	9.25098	3.67404	6.14788	8.87802	3.39564	7.56299	7.78603	10.188	8.43629	5.86841	3.45559	5.15155	5.67881	10.7799	9.26597	6.38484	-	10	60997806	61003241	-	1626	protein_coding	hypothetical protein	RNase_PH
SORBI_3010G276900	3.61022	5.33902	4.74106	3.47683	12.0724	11.2713	8.4653	6.83527	7.31958	8.72013	9.46752	8.17561	8.55753	6.58283	13.0148	7.45643	7.009	9.18714	7.47739	7.16683	-	10	60991920	60995339	-	1895	protein_coding	hypothetical protein	-
SORBI_3010G276850	0	0	0	0	0	0	0	0	0.124691	0	0	0	0	0	0	0	0	0	0	0.0906861	-	10	60990641	60991685	+	720	protein_coding	hypothetical protein	-
SORBI_3010G276800	9.24135	7.12905	9.281	6.87316	6.84952	38.2038	15.8643	7.22679	14.2692	60.4592	11.7687	11.4907	6.91121	4.88387	36.7413	8.44602	8.37484	3.96703	6.93632	6.64817	-	10	60984333	60988840	-	4508	protein_coding	hypothetical protein	NB-ARC
SORBI_3010G276700	0.827418	0.089428	0.0873536	15.5014	2.0109	0.0811592	0	0	0.118714	1.07278	0.57806	0.0851232	0.0734361	0.0307746	0.131501	0.0839111	0.0751842	0.0783027	0.17788	0.237433	-	10	60979154	60983631	-	3025	protein_coding	hypothetical protein	Glycos_transf_1
SORBI_3010G276600	4.01537	7.21802	3.66265	6.47902	124.315	9.05083	2.74973	2.51876	4.43313	46.719	42.8902	6.49383	5.56483	2.11025	2.2543	3.34728	1.02453	0.752389	3.90182	2.3757	-	10	60972238	60979018	+	3463	protein_coding	hypothetical protein	Piwi
SORBI_3010G276500	0.1457	0.0354315	0	0	0.10825	0	0	0.0571215	0	5.90017	0.114514	0.843149	0.981973	0.0304823	0	0.0277048	0	1.39607	0.665612	0.171039	-	10	60964703	60967450	+	1527	protein_coding	hypothetical protein	-
SORBI_3010G276400	0.356696	57.5967	57.5787	7.4862	4.69251	11.7208	17.298	25.3954	8.4826	12.2676	6.57886	5.17418	3.13414	6.70636	3.61396	5.53458	2.21695	2.27853	4.24316	2.14948	-	10	60960085	60963984	-	2339	protein_coding	Phytoene synthase 1 (EC 2.5.1.32) [Source: Projected from Oryza sativa (Os06g0729000)]	-
SORBI_3010G276301	0	0	0	0.0232954	0	0	0	0	0	0	0	0	0	0	0	0	0	0	0	0	-	10	60931802	60934349	-	2548	protein_coding	hypothetical protein	-
SORBI_3010G276200	0	0	0	0	0	0	0.0134211	0	0	48.936	0.118793	0.597679	0.396147	0	0	0	0	0	0.467091	0.465752	-	10	60927427	60931303	-	2944	protein_coding	hypothetical protein	-
SORBI_3010G276100	0	0	0.162332	0.0218786	0	0	0.0582554	0	0	157.608	0.257815	0	0	0.0343137	0	0	0.0335322	0	0	0.0481342	-	10	60923801	60926597	-	2713	protein_coding	hypothetical protein	Sugar_tr
SORBI_3010G276000	0.672049	9.47894	3.72491	1.79297	0.231259	3.59088	8.78177	10.2894	2.95452	1.07258	1.93489	1.21448	0.317853	20.6314	5.20163	4.07582	15.2007	0.489548	0.209114	0.207612	-	10	60919727	60922871	+	3145	protein_coding	hypothetical protein	-
SORBI_3010G275800	61.2015	12.2355	15.8769	25.5491	137.039	11.2617	5.49743	7.09086	3.3145	35.5406	34.4663	58.8476	87.055	4.34668	2.03733	2.88486	1.25126	81.8245	47.5479	32.1602	-	10	60885882	60900982	-	6907	protein_coding	hypothetical protein	DUF605
SORBI_3010G275700	3.53816	4.54877	49.7614	4.9772	2.28682	0.364037	0.0878819	0.203705	0.0599048	3.82737	1.15123	0.524999	0.605264	4.41033	0.0774169	0.0752761	1.63897	0.553178	4.17556	1.10372	-	10	60871874	60877556	-	4496	protein_coding	hypothetical protein	Myb_DNA-binding
SORBI_3010G275600	0	0.048426	0	0.0796912	0	0	0	0	0	0	0	0	0	0	0	0	0	0	0	0	-	10	60868413	60874107	+	4469	protein_coding	hypothetical protein	NB-ARC
SORBI_3010G275550	0	0	0	0	0	0	0	0	0	0.0733666	0	0	0	0	0	0	0	0	0	0	-	10	60863808	60864488	-	582	protein_coding	hypothetical protein	-
SORBI_3010G275500	57.1962	14.6865	25.7125	42.5326	23.3953	25.8602	27.2179	26.8147	19.0431	26.0681	18.1189	20.114	24.6967	18.7745	23.5923	23.5709	18.4034	22.4281	16.9338	23.0831	-	10	60853303	60862347	+	4837	protein_coding	hypothetical protein	-
SORBI_3010G275400	10.2161	9.31009	27.4131	21.777	9.10824	23.3057	16.1089	14.4026	15.761	17.963	15.1342	11.6845	12.2097	18.2214	28.4828	17.8953	22.5112	11.4258	16.4166	13.719	-	10	60846431	60848586	+	2156	protein_coding	hypothetical protein	-
SORBI_3010G275300	0.154122	0	0	0	0.407137	0	0	0	0	0	0.0323023	0.0528526	0.0341971	0	0	0	0	0	0.036815	0.0402057	-	10	60839942	60843562	+	3248	protein_coding	hypothetical protein	-
SORBI_3010G275200	904.952	780.015	290.764	387.556	677.188	816.449	957.108	1103.18	1581.88	634.062	699.201	578.114	462.601	957.568	847.918	1208.7	873.916	274.504	472.086	377.644	-	10	60834934	60836913	+	837	protein_coding	hypothetical protein	HMG_box
SORBI_3010G275150	2.18817	3.56666	1.31116	2.01958	2.91754	3.74155	4.53723	4.77625	3.69896	2.67864	4.53658	6.00052	4.63538	4.33049	3.56869	5.26284	5.17496	6.4222	7.2152	5.34571	-	10	60831090	60832970	-	1881	protein_coding	hypothetical protein	-
SORBI_3010G275100	2.29919	0.380679	0.154937	5.27267	0.174457	1.90734	0.0695017	0.0383573	0.908038	1.12663	28.6978	102.705	7.47319	0.040938	0.0437324	0.111623	0.0400057	0.41665	4.99545	3.79015	-	10	60828109	60830781	+	1137	protein_coding	hypothetical protein	DUF833
SORBI_3010G275001	19.1081	3.67521	0.0490432	2.04906	0	1.82262	4.57596	0.874188	0.549861	0.0713241	6.38698	2.86746	3.9271	2.77309	5.8694	0.400439	4.78672	0	0.0998679	1.52692	-	10	60821902	60823697	+	1796	protein_coding	hypothetical protein	-
SORBI_3010G274900	7.0924	2.08973	4.10115	0.72233	0.524755	3.20414	7.79781	8.93013	3.8951	3.2081	1.07323	2.22529	0.70522	12.0922	3.34123	1.925	21.3714	0	0.664307	1.07096	-	10	60801652	60805541	-	1890	protein_coding	hypothetical protein	Pkinase
SORBI_3010G274800	4.18049	6.24848	0.968816	3.31875	9.89362	7.7635	3.71214	2.37849	6.974	6.47731	5.73794	4.81874	4.7086	2.55985	6.10723	6.59201	1.75108	2.82241	4.57586	4.45866	-	10	60796738	60799723	-	2182	protein_coding	Hexosyltransferase (Fragment) [Source:Projected from Arabidopsis thaliana (AT4G38270) UniProtKB/TrEMBL;Acc:W8Q6G8]	Glyco_transf_8
SORBI_3010G274700	0.349817	0.483551	0.145782	0.334016	1.43357	1.02938	0.457765	0.534145	1.56018	0.890453	1.5281	0.42618	0.3309	1.55617	0.477322	0.322085	1.0088	0.235219	0.514557	0.280974	-	10	60792606	60795777	+	3021	protein_coding	hypothetical protein	Pkinase
SORBI_3010G274600	5.98589	6.19528	0.455006	2.45297	5.25139	2.67736	4.23522	3.88624	1.75845	1.6543	2.92066	7.05726	5.23564	4.70875	3.36058	3.80619	4.36654	3.87469	6.58873	2.92319	-	10	60785778	60791171	+	2323	protein_coding	hypothetical protein	-
SORBI_3010G274500	126.567	74.4931	33.4407	105.544	64.2391	94.4861	83.818	96.2194	186.278	109.202	84.5253	133.922	121.014	91.1917	230.319	187.806	88.5501	108.852	141.292	190.443	-	10	60781016	60785777	+	2497	protein_coding	Catalase isozyme B (EC 1.11.1.6) (CAT-B) [Source: Projected from Oryza sativa (Os06g0727200)]	Catalase
SORBI_3010G274400	1.25839	0	0	0	0	0	0	0	0	0	0	0	0	0	0	0	0	0	0	0	-	10	60762763	60764751	-	1989	protein_coding	hypothetical protein	FAD_binding_4
SORBI_3010G274300	0	0	0	0	0	0	0	0	0	0.0753075	0.0616801	17.4844	22.0381	0	0	0	0	4.3864	17.0822	8.86709	-	10	60741844	60742410	-	567	protein_coding	hypothetical protein	-
SORBI_3010G274200	0	0	0	0	0	0	0	0	0	0	0.0706517	1.73399	1.00975	0	0	0	0	0	0.966264	1.45098	-	10	60734049	60734543	-	495	protein_coding	hypothetical protein	-
SORBI_3010G274100	0.945933	0.0368054	0.0299597	0.343219	2.19273	0.180929	0.21503	0.311516	0.137414	28.292	0.523399	0.175169	0.170008	0.379972	0.744166	0.158285	0.58792	0.0805666	0.345711	0.266506	-	10	60713126	60717604	+	2940	protein_coding	hypothetical protein	U-box
SORBI_3010G274000	12.6694	0	0.0705217	0	14.7961	0.114662	0	0	0	2.11958	5.6141	2.49114	0.867056	0	0.0398109	0.254034	0	0.379289	0.526552	0.784155	-	10	60702993	60706899	-	2498	protein_coding	hypothetical protein	Cyclin_C
SORBI_3010G273900	5.25762	2.91829	3.26925	6.38738	7.5035	6.46818	7.1849	4.57667	9.43321	6.66999	4.23033	2.47528	3.15866	3.91513	8.60374	9.65846	9.06085	3.51029	3.49626	2.96395	-	10	60695280	60700347	-	3745	protein_coding	hypothetical protein	-
SORBI_3010G273800	11.3708	11.1273	11.1729	22.3684	43.1484	10.4713	7.28923	7.01448	10.0613	59.1691	34.7745	274.263	267.476	14.2391	9.5406	9.70101	10.9011	516.408	217.268	173.865	-	10	60687868	60695066	-	4060	protein_coding	Branching enzyme-I precursor (Starch-branching enzyme I) (1,4-alpha- glucan branching enzyme I) [Source: Projected from Oryza sativa (Os06g0726400)]	-
SORBI_3010G273700	0.693593	44.9439	10.3501	1.50883	0	11.3039	68.5438	21.2518	4.09057	1.31068	0.369015	0	0	199.759	77.2448	9.51613	135.129	0	0	0.187896	-	10	60681548	60684969	-	2085	protein_coding	hypothetical protein	NAM
SORBI_3010G273600	0.0465836	8.9267	2.06556	0	0	0	7.21403	16.9116	0	0.107285	0.0878709	0	0	23.0783	0.333158	0	15.8098	0	0	0	-	10	60674925	60676118	+	1194	protein_coding	hypothetical protein	-
SORBI_3010G273500	0	0	0	0.0999271	0.13914	0	0	0	0	0.107827	0.176629	0.144499	0	0	0	0.0356104	0	0	0	0.274806	-	10	60654468	60655909	+	1188	protein_coding	hypothetical protein	-
SORBI_3010G273400	0.128343	0	0	0.034241	0.10489	0	0	0	0.0258948	0.0615797	0.0201746	0.0618926	0.0160185	0	0	0	0.0131198	0	0.0172448	0.075332	-	10	60650466	60654467	+	3467	protein_coding	hypothetical protein	NB-ARC
SORBI_3010G273300	3.57563	4.55697	3.48656	3.72746	10.8821	4.26227	4.82137	6.12648	2.79218	7.72655	5.8704	2.7589	3.99992	4.94557	5.09077	3.76466	4.33204	1.79764	2.22424	3.59506	-	10	60643042	60647037	+	3360	protein_coding	hypothetical protein	-
SORBI_3010G273200	0.207696	0	0.0657816	0.0443291	0.0493795	0	0	0	0	1.62634	0.0522369	0.128204	0	0	0	0.0631892	0	0.0884487	0.0446509	0	-	10	60640105	60641443	+	1339	protein_coding	hypothetical protein	-
SORBI_3010G273100	0	0	0	0.0244871	0	0	0	0	0	0.0176152	0	0	0	0	0	0	0	0	0	0	-	10	60637611	60640034	+	2424	protein_coding	hypothetical protein	-
SORBI_3010G273000	1.74497	8.91124	3.92296	4.15663	6.9638	5.38693	4.9694	5.54621	9.0406	7.4993	4.77077	3.26981	3.01792	5.77594	4.44311	6.5887	5.16023	0.497617	1.79195	2.98121	-	10	60630113	60634059	+	3570	protein_coding	hypothetical protein	-
SORBI_3010G272900	1.52196	7.26769	4.16306	4.28195	4.93426	5.69999	4.8161	5.96685	7.81643	3.39895	3.30587	2.45541	3.31558	5.44201	4.94764	4.31471	4.75232	0	1.63598	3.41088	-	10	60619608	60621169	+	402	protein_coding	hypothetical protein	-
SORBI_3010G272800	5.84741	640.475	496.302	7.46188	7.62107	20.8865	87.4812	119.637	21.3783	22.2421	16.8883	23.5781	16.2317	267.724	37.5212	46.0829	128.955	11.8133	12.836	12.7983	-	10	60614796	60619286	-	3158	protein_coding	hypothetical protein	AAA
SORBI_3010G272700	0.168111	0.0233609	0.152127	0.025629	0.0999209	0.0353349	0.119422	0.0376617	0.0775279	0.294987	0.890926	0.592971	0.407648	0.442152	0.214697	0.0547994	0.333882	0.255684	0.10326	0.140963	-	10	60612166	60614481	+	2316	protein_coding	hypothetical protein	Exo70
SORBI_3010G272600	0	0	0	0	0	0	0	0	0	0	0	0.0586288	0	0	0	0	0	0	0	0	-	10	60608811	60609817	-	732	protein_coding	hypothetical protein	-
SORBI_3010G272501	0.857504	0.454974	0.802425	0.0415954	0	1.83513	4.18099	3.69803	0.220197	0.478759	4.70549	1.17291	2.17941	9.00269	12.4048	5.69208	9.59455	0.414971	0.670358	1.92176	-	10	60600931	60603375	+	1427	protein_coding	hypothetical protein	Exo70
SORBI_3010G272400	0	0	0	0	0	0.0322441	0	0	0.0353733	0	0.0551184	0	0	0	0.0391834	0	0	0	0	0	-	10	60599002	60600337	+	1269	protein_coding	hypothetical protein	Exo70
SORBI_3010G272300	1.09469	0.15212	0.288927	0.0834443	0	0	0.222184	0.0613106	0	0.0200091	0.163883	0.160886	0.0520488	1.78857	0.32621	0	1.06576	0	0.0560334	0	-	10	60589828	60592572	-	2134	protein_coding	hypothetical protein	Pkinase
SORBI_3010G272200	0.179567	3.8864	10.8058	15.4739	0.0533649	3.17038	4.91106	2.99196	10.6153	0.654792	0.197585	0.138551	2.5101	5.29706	11.0765	1.98039	7.81971	0.286762	1.83368	5.95498	-	10	60585393	60586678	+	1239	protein_coding	hypothetical protein	Exo70
SORBI_3010G272101	12.4015	6.40964	18.7829	18.0306	0.662798	15.9843	10.8981	8.66416	9.87223	1.24518	6.31037	1.61653	4.68986	20.5585	29.4234	6.91378	25.5343	0	2.32467	5.83124	-	10	60580138	60581783	+	1646	protein_coding	hypothetical protein	Exo70
SORBI_3010G272000	1.08655	1.92929	1.85722	5.72401	0.112761	1.76359	1.38444	0.879007	0.431488	0.0926808	0.607276	0.199611	1.20543	3.73816	3.00656	0.747719	4.96472	0	0.222465	1.37674	-	10	60574623	60577847	-	3225	protein_coding	hypothetical protein	Exo70
SORBI_3010G271901	0	0.21781	0.0709191	0	0	0	0	0.105344	0	0	0.0281583	0.138217	0.134145	0.524679	0.240212	0.0340621	0.476106	0	0	0.105143	-	10	60572054	60573552	+	1242	protein_coding	hypothetical protein	Exo70
SORBI_3010G271800	0	0.0388957	0.696547	0	0	0	0.113621	0	0	0.0613938	0.201136	0.21597	0.199626	0	0	0	0	0	0	0.140821	-	10	60568843	60570233	+	1391	protein_coding	hypothetical protein	Exo70
SORBI_3010G271700	2.76355	0.170138	0	0.447975	0.873271	0.360282	0.124251	0.0822873	0	0.671373	1.38571	0.620802	0.768423	0.117098	1.62619	0	0.0572157	0	0.564034	3.2031	-	10	60566616	60568409	+	1590	protein_coding	hypothetical protein	Exo70
SORBI_3010G271600	0	0	0	0	0	0	0	0	0	3.42764	0	0.0267058	0	0	0	0	0	0	0	0	-	10	60560336	60561942	-	1607	protein_coding	hypothetical protein	Exo70
SORBI_3010G271501	0	0	0	0.0718894	0.0133466	0.0165191	0	0	0.126855	0	0	0	0.0224207	0	0	0	0	0	0	0	-	10	60555028	60557504	-	2477	protein_coding	hypothetical protein	Exo70
SORBI_3010G271400	1.33796	0	0	0.271967	0	0.140611	0	0	2.10817	0.0489111	0	0	1.08146	0	0	0	0	0	0.205456	1.34627	-	10	60552010	60552882	+	873	protein_coding	hypothetical protein	-
SORBI_3010G271300	1.30954	0	0	0.294209	0	0	0	0	0	0.0793668	0	0	0	0	0	0	0	0	0	0.121364	-	10	60545707	60547320	+	1614	protein_coding	hypothetical protein	-
SORBI_3010G271200	4.39859	0	0	0.403787	0.44979	0	0	0	0	0.617253	0	0	0.094449	0	0	0	0	0	0	0.333133	-	10	60529076	60530251	+	1176	protein_coding	hypothetical protein	-
SORBI_3010G271100	6.63777	2.68015	6.32459	15.4146	4.36714	5.91706	1.66074	1.22206	3.87455	1.69857	3.82362	0.869707	3.18182	2.16604	1.46795	1.21719	1.99153	1.30374	1.09194	3.34883	-	10	60517191	60521187	+	3997	protein_coding	hypothetical protein	-
SORBI_3010G271000	2.44853	0.0294043	0	1.74199	4.09651	0	0	0	0	1.39237	16.555	9.04974	4.98013	0	0	0	0	0	6.62862	2.02269	-	10	60503934	60506087	+	1840	protein_coding	hypothetical protein	-
SORBI_3010G270900	0.059679	3.59919	0.047254	2.32459	0	0.658548	2.69205	1.6144	0	5.24579	0.0375243	0.18419	0.029794	3.17136	0.106703	0	0.46365	0	0	0.035029	-	10	60496188	60498333	-	1864	protein_coding	hypothetical protein	Lipase_GDSL
SORBI_3010G270800	0	0	0	0	0	0.224412	0	0	0	3.17448	0.873782	2.69371	7.44542	0	0	0	0	0	5.72008	6.2469	-	10	60491026	60492971	-	1641	protein_coding	hypothetical protein	Lipase_GDSL
SORBI_3010G270700	107.891	0	0.0344607	0	0	0	0.108209	0	0	0	0	0	0	0	0	0	0.017796	0	0.0467822	0.0255454	-	10	60480062	60488608	-	2556	protein_coding	hypothetical protein	Lipase_GDSL
SORBI_3010G270500	0.852582	0.00987298	0.112513	0	0	0.843742	0.634494	0.0955013	1.26966	0.140253	0.0510549	0.0313258	0.0912088	0.0849389	1.06162	0.301077	0.348619	0	0.0545507	0.131065	-	10	60470745	60476949	-	5480	protein_coding	hypothetical protein	Lipase_GDSL
SORBI_3010G270300	0.69817	15.3612	15.9526	2.23519	3.87309	62.9786	109.797	117.464	73.0346	31.0355	18.8973	10.03	6.90466	52.8343	13.3746	11.4044	25.1494	14.2289	12.9724	20.2166	-	10	60467129	60469704	-	1673	protein_coding	hypothetical protein	Rhodanese
SORBI_3010G270200	2.05182	0	0	0	0	0	0	0.0434818	0	19.4978	0.034868	0	0	0.139222	0	0	0	0	0	0.0650987	-	10	60458789	60461306	-	1003	protein_coding	hypothetical protein	Rhodanese
SORBI_3010G270100	0.352674	0.145363	0.0473302	0.395499	1.82973	0.237459	0.195329	0.224975	0.0964829	2.11547	0.364572	0.249058	0.238736	0.100046	0.122907	0.150034	0.15154	0.0763672	0.122081	0.140342	-	10	60442151	60453778	-	9305	protein_coding	hypothetical protein	-
SORBI_3010G269950	0	0	0	0.0294867	0	0	0	0	0	0	0	0.213196	1.18631	0	0	0	0	0.117668	1.27713	3.34093	-	10	60424260	60426340	-	2013	protein_coding	hypothetical protein	Exo70
SORBI_3010G269800	1.43529	1.05043	0.68188	0.393864	7.94193	0.321791	0.441824	0.557345	0.115835	2.62345	1.28064	2.23599	2.29978	0.549087	0.494916	0.400282	0.424794	1.58628	1.08731	1.24362	-	10	60409710	60422553	-	8138	protein_coding	Ataxia telangiectasia-mutated and RAD3-related [Source:Projected from Arabidopsis thaliana (AT5G40820) TAIR;Acc:AT5G40820]	PI3_PI4_kinase
SORBI_3010G269700	15.2824	0.345712	0.0562821	8.26822	206.321	1.07197	0.0252471	0.195071	0.40156	9.79493	33.2072	21.7461	21.0079	0	0.285952	0.0540641	0	0.227028	13.7531	9.97142	-	10	60405194	60407174	+	1565	protein_coding	hypothetical protein	HLH
SORBI_3010G269600	18.7267	19.3742	38.2553	14.6707	22.5294	16.2317	18.9164	24.8263	19.5978	14.8056	17.7983	18.9455	22.6071	25.5455	19.4992	18.1818	23.7539	34.8422	29.8259	30.222	-	10	60376184	60381115	+	3083	protein_coding	hypothetical protein	RRM_1
SORBI_3010G269500	2.72106	5.9483	3.56774	6.08867	7.14754	4.0681	3.84517	4.15245	4.06147	4.46984	7.00924	11.0169	13.6722	4.50529	5.83293	4.82915	3.73271	25.1693	15.3793	10.682	-	10	60373046	60376010	-	1901	protein_coding	hypothetical protein	-
SORBI_3010G269400	4.58729	26.7003	104.071	11.6	5.21603	8.89517	8.69576	8.60125	6.4989	12.9763	13.9044	9.3681	5.20261	29.7723	14.5316	11.4533	21.1835	1.11479	10.2371	8.04834	-	10	60367187	60370956	-	2231	protein_coding	hypothetical protein	-
SORBI_3010G269300	8.86511	6.69224	2.33077	6.20962	12.3083	9.19076	8.09686	7.03164	4.0607	9.48583	13.1067	12.8617	14.0463	5.49965	7.19083	6.66469	4.67461	17.273	14.0179	8.19691	-	10	60360888	60364326	-	1625	protein_coding	hypothetical protein	-
SORBI_3010G269200	0.621679	1.5874	1.47674	1.09881	2.62121	1.87224	1.7113	1.38621	1.81875	0.969423	1.41698	2.12858	2.98727	1.07303	0.868386	1.09346	0.794385	5.50177	5.49219	3.03322	-	10	60357116	60360297	+	2863	protein_coding	hypothetical protein	-
SORBI_3010G269100	32.3281	15.8576	18.6402	26.3611	22.6966	17.5217	20.6882	21.7953	20.9391	18.7937	17.5992	16.7359	16.3325	21.8974	18.0073	20.7218	24.3363	22.8864	16.4245	20.4348	-	10	60350750	60355553	+	2013	protein_coding	hypothetical protein	FYVE
SORBI_3010G269000	1.07164	0	0.0413917	0	0	0	0	0	0	0.140458	0.164345	0	0.0521955	0.0437467	0	0.397605	0.171002	0	0.0561913	0	-	10	60342748	60346389	-	2128	protein_coding	hypothetical protein	bZIP_1
SORBI_3010G268900	0	0	0	0	0	0	0	0	0	0	0	0	0	0	0	0	0	0	0	0	-	10	60338739	60339677	+	804	protein_coding	hypothetical protein	Cu_bind_like
SORBI_3010G268800	0.704061	0	0	1.5027	0	1.12222	0.13893	0.092009	0	1.26116	0.737819	0.181081	0.312439	0	0.524513	0	0.511803	1.58244	0.630671	0.642838	-	10	60329436	60331636	-	1422	protein_coding	hypothetical protein	-
SORBI_3010G268700	0.376453	0	0	0	0.111877	0	0	0	0	0	0	0	0	0	0	0	0	0	0	0	-	10	60323587	60324852	+	1182	protein_coding	hypothetical protein	-
SORBI_3010G268600	0.102433	0	0	0	0	0	0	0	0	0	0	0	0	0	0	0	0	0	0	0	-	10	60321724	60322276	-	543	protein_coding	hypothetical protein	-
SORBI_3010G268500	0	0	0	0	0.0570977	0	0.0170603	0.0188308	0	0	0.0453013	1.09329	0.623462	0	0.0214697	0	0	0	0.0774451	0	-	10	60310429	60313483	-	2316	protein_coding	hypothetical protein	-
SORBI_3010G268400	16.795	20.9871	58.2003	12.0657	0.0150339	9.95498	30.5277	38.0392	8.73686	5.33985	16.9058	6.63554	7.34924	64.4751	54.2914	9.33061	83.5884	0.107715	1.38662	6.50268	-	10	60307573	60310425	+	2199	protein_coding	hypothetical protein	-
SORBI_3010G268300	16.1894	37.6978	41.8832	29.2317	15.3177	49.2245	31.3386	35.4428	41.439	35.5486	30.3253	23.6775	23.0467	39.7799	73.4632	38.6612	47.9043	17.4445	23.1646	21.472	-	10	60294432	60299347	-	3123	protein_coding	hypothetical protein	PP2C
SORBI_3010G268200	0.206385	58.4537	62.0983	7.92891	10.1612	56.7332	70.9842	75.0336	48.2477	43.4915	68.8205	31.4773	30.8419	71.1008	180.691	142.247	169.625	1.83106	33.9055	40.0163	-	10	60289825	60293153	+	1617	protein_coding	hypothetical protein	-
SORBI_3010G268100	2.93846	12.1989	2.61752	2.32387	3.30596	4.90241	5.88948	5.01952	4.2983	2.67878	3.89318	3.2997	3.61508	5.18159	5.74638	4.23052	3.94788	4.4133	3.89183	3.2339	-	10	60275497	60278707	-	2120	protein_coding	hypothetical protein	S4
SORBI_3010G268001	0	0	0	0	0.413244	0.511472	0	0	0	1.06748	1.45719	0.357636	0.4628	0	1.03591	0	0	0.49347	0	1.63235	-	10	60274514	60274786	+	240	protein_coding	hypothetical protein	-
SORBI_3010G267900	36.1458	44.7077	15.0503	26.4362	29.7258	30.3731	34.7526	28.5862	27.914	21.5291	27.6254	23.9225	20.6899	33.1171	27.0208	37.8021	22.8069	21.2317	28.8052	24.8739	-	10	60272534	60273532	+	357	protein_coding	hypothetical protein	-
SORBI_3010G267700	1.45435	16.8662	12.9231	26.2121	5.90692	7.32288	13.7063	8.26124	37.1812	4.91253	0.772202	0.187026	0.322696	6.74803	6.35632	35.2256	7.10974	0	0.22581	0.815701	-	10	60242646	60247066	-	3442	protein_coding	Serine/threonine protein kinase domain containing protein [Source: Projected from Oryza sativa (Os06g0717200)]	Pkinase
SORBI_3010G267651	0	0	0	0	0	0	0	0	0	0.51445	0	0	0	0	0	0	0	0	0	0	-	10	60458160	60460283	+	747	protein_coding	hypothetical protein	-
SORBI_3010G267650	0.330455	1.53954	2.97461	1.26212	1.86076	0.997995	1.17374	1.8274	1.23521	1.04145	1.3451	0.738085	0.712	1.38271	0.917356	1.00538	1.67836	0.444401	0.616945	1.00044	-	10	60234714	60238848	-	3198	protein_coding	hypothetical protein	-
SORBI_3010G267600	108.881	167.851	1486.33	175.662	19.9967	49.9084	18.8926	37.5958	14.3184	26.2273	27.9213	8.86723	17.2987	50.1494	99.1993	14.6035	41.5398	3.32677	10.9723	34.7256	-	10	60231072	60234505	-	1602	protein_coding	hypothetical protein	-
SORBI_3010G267500	7.98479	10.4065	24.5905	17.5687	10.171	7.71745	7.40614	7.92024	7.8377	8.73124	8.50641	8.83571	8.82821	12.4298	11.0497	7.14961	13.6013	8.1001	9.49009	8.30654	-	10	60224593	60228876	-	4284	protein_coding	hypothetical protein	bZIP_2
SORBI_3010G267450	0	0	0	0	0	0	0	0	0	0	0	0	0	0	0	0	0	0	0	0	-	10	60226153	60226977	-	825	protein_coding	hypothetical protein	-
SORBI_3010G267400	228.92	91.4927	428.017	162.338	107.721	67.017	97.2616	106.645	23.2579	43.1112	60.7572	47.6546	52.581	159.995	113.404	51.9564	181.114	72.0759	89.234	41.2132	-	10	60217781	60223250	-	3007	protein_coding	hypothetical protein	HATPase_c
SORBI_3010G267300	0.6634	0	0.0552929	0.037261	0	0.077058	0	0	0	0.0268044	0	0.0808217	0.0348625	0	0	0	0	0	0	0	-	10	60214973	60217659	+	1593	protein_coding	hypothetical protein	Thaumatin
SORBI_3010G267200	3.8245	0.0292929	0.0238445	0.0160684	0	0.0110768	0.0213924	0	0.0121518	0.0231182	0.0189348	0.0232357	0.0451024	0.0630029	0.0942248	0	0.0738816	0	0.0323701	0	-	10	60211594	60215501	+	3694	protein_coding	hypothetical protein	-
SORBI_3010G267100	3.83766	0	0.239895	0	0	0.148589	0.0538062	0.277155	0.0815046	0.135677	0	0.0779234	0.0504186	0.105644	3.38564	0.0960172	0.309713	0	0.108557	0.148193	-	10	60201097	60203514	-	2203	protein_coding	hypothetical protein	-
SORBI_3010G267000	18.4859	185.688	2202.64	30.1715	9.7272	148.712	110.038	305.542	8.99529	30.6784	48.1001	4.65661	2.06292	176.222	91.2818	23.4064	149.309	3.24156	5.37679	1.34035	-	10	60199286	60200308	+	1023	protein_coding	hypothetical protein	DnaJ
SORBI_3010G266900	20.645	7.78089	89.5702	8.44167	1.74996	11.9126	9.99132	13.7262	3.79321	8.37376	11.8322	7.56783	10.413	18.6127	23.1495	6.05709	15.5489	3.17231	6.06265	17.5936	-	10	60190022	60196661	+	3136	protein_coding	hypothetical protein	-
SORBI_3010G266800	39.8173	11.3637	79.6023	21.367	6.98224	7.32891	10.4658	13.0023	3.53557	23.9156	11.5487	8.36292	7.29032	10.8898	15.4045	5.18325	10.0845	6.77154	4.49977	4.41896	-	10	60175414	60179285	-	1714	protein_coding	hypothetical protein	DUF803
SORBI_3010G266700	5.63898	3.55291	11.1624	1.98312	1.10452	4.24263	6.05421	5.27568	11.067	8.60874	11.6038	7.71307	3.77492	4.77263	3.37984	4.289	4.29711	1.09155	7.02573	4.8143	-	10	60173415	60175153	+	868	protein_coding	hypothetical protein	-
SORBI_3010G266600	0	0.118823	0.193444	0	0.0968069	0	0.231401	0.574686	0	2.62573	2.71383	0.37701	0.0813119	0.20445	0	0	0	0	0.0437684	0.143398	-	10	60168852	60171033	+	1366	protein_coding	hypothetical protein	-
SORBI_3010G266500	16.1983	11.6558	6.19039	12.4603	15.8996	13.9275	10.4723	10.1168	10.3304	16.2599	17.9763	21.4286	21.8369	10.4339	11.6715	11.8151	9.42324	30.7371	22.3826	18.7154	-	10	60161396	60167011	-	2177	protein_coding	hypothetical protein	-
SORBI_3010G266400	0	0.237298	0.289742	0	0	0	0	0	0	0.0468195	0	0.141172	0.182684	0.102076	0	0.0463872	0	0.259721	0	0.143189	-	10	60159629	60160540	+	912	protein_coding	hypothetical protein	-
SORBI_3010G266300	291.365	101.758	226.912	211.286	71.8115	100.194	125.208	192.573	65.7351	98.7953	107.581	232.594	257.222	168.731	160.532	101.28	189.477	487.163	396.34	159.505	-	10	60153893	60157793	+	1208	protein_coding	hypothetical protein	-
SORBI_3010G266200	24.847	37.9488	65.236	35.3777	12.6393	33.6829	31.068	26.1469	33.6928	30.9495	16.7696	17.6389	27.4429	27.9334	29.4034	31.605	31.6914	47.498	32.8692	31.5384	-	10	60149345	60152424	+	1708	protein_coding	hypothetical protein	-
SORBI_3010G266100	0.0224187	0.0436146	0.0710049	0	0	0.0329849	0.0159257	0.035157	0	27.4508	0	0	0.0223845	0.0187612	0	0.0852583	0	0	0.0963927	0.0526352	-	10	60145657	60148593	-	2481	protein_coding	hypothetical protein	-
SORBI_3010G266000	0.11102	33.4595	5.97759	0.730605	2.73847	5.34953	11.8956	9.69161	8.51182	4.36085	4.85149	3.66916	3.10381	22.3597	9.39558	9.59818	12.2871	1.26076	3.24198	1.45532	-	10	60143949	60146954	+	3006	protein_coding	hypothetical protein	-
SORBI_3010G265900	45.8455	2.39561	0.360006	12.0088	28.7807	11.0099	5.92137	2.88174	4.37267	13.9326	21.6316	23.3584	19.71	3.17074	7.21469	4.92792	4.36893	31.7865	25.7803	17.5689	-	10	60136399	60140204	-	1468	protein_coding	Novel plant SNARE 11 [Source:Projected from Arabidopsis thaliana (AT2G35190) UniProtKB/Swiss-Prot;Acc:Q944A9]	-
SORBI_3010G265800	19.583	25.5178	43.6245	44.9383	3.98402	26.1247	16.32	15.0664	18.647	10.1098	18.792	23.0401	18.5558	17.026	47.5619	20.2329	19.0888	6.43657	16.1054	23.8527	-	10	60129842	60133133	-	2116	protein_coding	hypothetical protein	Pkinase
SORBI_3010G265700	1.72549	2.0725	0.867272	1.48112	1.45366	1.42942	1.43359	1.26472	1.07772	2.21157	2.31138	2.40804	1.88017	1.49421	1.52243	1.95149	2.10438	2.6038	3.09663	1.73495	-	10	60121829	60129325	-	7414	protein_coding	hypothetical protein	-
SORBI_3010G265600	3.11613	10.962	25.0116	3.37099	5.15049	131.766	173.057	34.4413	88.3993	24.2498	13.3395	49.306	5.19984	124.708	234.728	306.786	257.594	0.636247	16.7479	17.3382	-	10	60120186	60121598	+	1303	protein_coding	hypothetical protein	-
SORBI_3010G265500	0.498522	110.148	291.199	1.36802	1.5662	23.4714	61.62	53.3845	31.0945	9.56772	8.4185	13.9574	2.91546	54.056	38.3911	51.0804	40.9436	1.51643	5.51179	10.116	-	10	60117489	60118269	-	781	protein_coding	hypothetical protein	-
SORBI_3010G265400	0.0882871	0	0.279624	0	0	0.259795	0.878038	0.276903	0.0712519	0.135554	0.0555121	0	0	1.10825	0.71034	0.537208	1.58842	0	0.0949009	0	-	10	60115041	60115675	-	630	protein_coding	hypothetical protein	Ras
SORBI_3010G265300	17.2638	34.5172	21.2746	11.5681	14.5381	15.3129	20.6224	18.2828	20.5625	12.4708	11.7676	12.558	13.2596	24.4492	25.4003	20.8355	22.8064	24.1995	15.6357	18.671	-	10	60109726	60114901	+	1801	protein_coding	hypothetical protein	AAA
SORBI_3010G265100	0	0	0	0	0	0	0	0	0	0	0	0	0	0	0	0	0	0	0	0	-	10	60450696	60451098	+	403	protein_coding	hypothetical protein	-
SORBI_3010G264900	0.943292	0.990647	0.52878	1.45207	3.58232	2.64679	1.44099	1.02109	1.67751	2.05711	1.00777	1.1465	2.60052	1.0339	2.1791	1.84129	1.2015	1.01316	2.50349	2.27348	-	10	60426933	60433771	+	6663	protein_coding	hypothetical protein	-
SORBI_3010G264700	2.04272	0.484395	1.35188	0.433815	2.34975	5.1736	1.21286	2.41449	0.902202	1.77101	1.15659	0.219561	0.233387	1.2502	5.92361	1.39909	1.77026	0	0.305875	0.835114	-	10	60090578	60096139	-	5473	protein_coding	hypothetical protein	-
SORBI_3010G264601	0	0	0	0.139172	0	0.0479693	0	0	0	0.100116	0	0	0	0.109136	0.116586	0	0.0533253	0	0	0	-	10	60089469	60090444	-	853	protein_coding	hypothetical protein	-
SORBI_3010G264500	2.92073	22.2345	24.1319	18.9725	0.754784	27.7456	48.1718	43.7118	57.4944	36.4602	10.1405	28.023	26.5001	39.0013	39.9607	73.1165	59.2986	31.0954	47.639	42.4858	-	10	60072648	60073085	-	438	protein_coding	hypothetical protein	Auxin_inducible
SORBI_3010G264450	0	0	0	0	0	0	0	0	0	0	0	0	0	0	0	0	0.152896	1.39333	0.502417	0.768165	-	10	60067120	60067714	+	595	protein_coding	hypothetical protein	-
SORBI_3010G264400	39.3718	34.1871	52.9643	27.1382	17.4537	46.3139	53.9706	48.9638	50.8085	42.9045	26.2829	25.731	35.2132	57.6852	52.7637	44.7252	66.6406	45.1493	28.2229	33.1317	-	10	60055582	60061857	+	2290	protein_coding	hypothetical protein	Pkinase
SORBI_3010G264300	170.946	43.7531	44.6328	90.9686	56.0679	33.005	36.8149	36.4864	25.6706	101.781	67.5944	112.949	71.2722	38.4117	57.1798	39.1552	39.7007	93.0806	113.331	62.9982	-	10	60035291	60038625	-	967	protein_coding	NADH dehydrogenase [ubiquinone] 1 beta subcomplex subunit 9 [Source:Projected from Arabidopsis thaliana (AT4G34700) UniProtKB/Swiss-Prot;Acc:Q945M1]	-
SORBI_3010G264200	12.6486	25.1446	28.9086	19.4221	10.6204	15.5829	17.1662	17.7351	19.1902	19.9292	18.997	23.8448	26.1135	14.5602	11.3076	17.3296	12.6703	66.273	31.0219	27.6219	-	10	60030270	60035130	-	2014	protein_coding	hypothetical protein	-
SORBI_3010G264150	0	0	0	0	0	0	0	0	0	0	0	0	0	0	0	0	0	0	0	0	-	10	60019499	60020705	+	1207	protein_coding	hypothetical protein	-
SORBI_3010G264100	7.39295	3.54918	6.30775	5.09897	2.90449	13.6765	9.80001	8.21838	14.7899	4.2716	3.34568	1.83999	2.4114	4.60194	8.64002	13.2648	4.24493	0.721418	1.11124	2.47816	-	10	60014456	60027759	-	12805	protein_coding	hypothetical protein	-
SORBI_3010G264000	20.28	17.5221	5.47853	23.0425	21.502	14.3925	16.6097	19.2455	12.6362	16.4616	12.2076	27.2915	24.6562	19.2925	29.301	21.8671	17.8044	23.4326	29.7495	21.6013	-	10	60004231	60006095	-	1865	protein_coding	hypothetical protein	-
SORBI_3010G263950	0	0.107685	0.0751335	0.0843854	0.0187999	0.0349029	0	0	0.0255267	0.0607042	0.00994387	0.0244051	0.0789537	0.0264695	0	0.0360863	0	0.101023	0.203995	0.129957	-	10	59999861	60003377	-	3517	protein_coding	hypothetical protein	-
SORBI_3010G263900	13.5342	17.3225	6.95628	28.4114	16.0005	15.8081	21.6323	19.6651	20.6478	10.1166	9.55495	16.0535	13.1283	22.6523	28.7358	33.1172	24.0782	12.0076	18.1532	14.4595	-	10	59997461	59999334	+	1874	protein_coding	hypothetical protein	-
SORBI_3010G263800	16.8423	22.2052	10.1846	14.2021	21.3269	32.0175	26.9593	24.989	45.6338	22.8528	24.8432	25.622	34.7776	22.3274	25.6731	29.0591	22.548	68.8768	44.045	32.3667	-	10	59993061	59997379	-	1747	protein_coding	hypothetical protein	-
SORBI_3010G263700	0	0.0904244	0.0490705	0	0.0368352	0	0.0440242	0.170076	0	0.11894	0.253283	1.14762	1.94918	0.492693	0.0277013	0.14141	0.126703	1.84742	2.09839	0.763885	-	10	59990785	59992579	-	1795	protein_coding	hypothetical protein	-
SORBI_3010G263600	0.367063	0.0630092	0.0683863	0.0921688	0.179671	0.0158842	0.552182	0.981953	0.209109	0.0331517	0.488748	0.283221	0.43118	1.48168	0.135119	0.246342	0.882889	0.183902	0.232095	0.0760412	-	10	59986190	59988765	+	2576	protein_coding	hypothetical protein	-
SORBI_3010G263500	0.0304939	0.0593245	0.144871	0	0.235622	0.044866	0.108311	0.286923	0	0.257507	0.115041	0.164701	0.5785	0.178633	0	0.0231936	0.0498755	0.324651	0.19667	0.107391	-	10	59983115	59984938	+	1824	protein_coding	hypothetical protein	-
SORBI_3010G263400	0.22039	0.0535948	0	0.0881972	0.31111	0.0405327	0.195699	0.0648027	0.0222331	1.7342	2.7888	1.67924	1.01775	0.0461085	0.0492559	0.0628606	0.157704	0.0586592	0.740312	0.808494	-	10	59977878	59979896	+	2019	protein_coding	hypothetical protein	-
SORBI_3010G263300	0	0	0	0	0	0	0	0	0	0.11005	0	0	0.0954227	0	0	0	0	0	0.102728	0	-	10	59971592	59972755	-	1164	protein_coding	hypothetical protein	-
SORBI_3010G263200	0	0	0	0	0	0	0	0	0	0.0358818	0.0587775	0.0721282	0.186676	0	0	0	0	0	0.150725	0.0548689	-	10	59962584	59969274	-	1190	protein_coding	hypothetical protein	-
SORBI_3010G263151	0.147928	0	0	0.157864	0.0879243	0.326472	0	0	0.477539	0.340686	0	0.114139	0.221553	0	0.595099	1.06888	0.181462	0	0	0.0868271	-	10	59961488	59962239	+	752	protein_coding	hypothetical protein	-
SORBI_3010G263101	0	0.0760955	0	0	0	0	0	0	0	0.120111	0.0491879	0	0	0	0	0	0	0	0	0.091834	-	10	59957814	59958524	+	711	protein_coding	hypothetical protein	-
SORBI_3010G263051	0	0.117873	0	0	0	0	0	0	0	0.0930269	0	0.0934996	0	0	0	0	0	0	0	0	-	10	59957057	59957633	+	459	protein_coding	hypothetical protein	-
SORBI_3010G263001	8.45437	7.53127	12.9656	11.4915	23.4855	12.1771	13.592	13.1883	10.2705	22.1353	19.0811	7.07261	5.33146	8.86246	6.04641	11.2363	12.3723	3.22137	6.40923	7.52187	-	10	59947741	59952960	+	625	protein_coding	hypothetical protein	-
SORBI_3010G262950	0	0	0	0	0.0176789	0	0	0	0	0	0.0561058	0.114749	0.0890952	0	0	0	0	0.126666	0.031972	0.209499	-	10	59945635	59947504	-	1870	protein_coding	hypothetical protein	-
SORBI_3010G262900	10.9197	16.2267	18.3227	11.306	51.7022	31.0729	24.2286	19.201	21.7881	26.2902	33.8331	54.6403	57.3919	19.7152	20.7286	24.4925	21.1662	125.952	105.939	63.0575	-	10	59940876	59944257	-	1197	protein_coding	hypothetical protein	-
SORBI_3010G262800	5.64969	7.19986	1.70895	4.18654	3.14673	2.0641	3.60755	2.9765	2.88943	1.89082	1.85999	4.88821	5.90728	4.78109	4.4151	3.6405	3.66508	5.27149	7.69692	6.06589	-	10	59936201	59940581	-	4381	protein_coding	hypothetical protein	-
SORBI_3010G262700	0	0	0	0	0	0	0	0	0	0	0	0	0	0	0	0	0	0	0	0	-	10	59933852	59934735	+	884	protein_coding	hypothetical protein	-
SORBI_3010G262650	0.47949	0.621884	0	0.170565	0.854988	0.11758	0.340618	0.208871	0	0.163599	0.267989	0.205538	0.0531954	0.490433	0.476282	0.283655	0.130708	1.13441	1.08809	0.938132	-	10	59932603	59933723	-	1044	protein_coding	hypothetical protein	-
SORBI_3010G262600	0	0	0	0	0	0	0	0	0	0	0	0	0	0	0	0	0	0	0	0	-	10	59929479	59929973	+	495	protein_coding	hypothetical protein	-
SORBI_3010G262550	0	0	0	0	0	0	0	0	0	0	0	0	0	0	0	0	0	0	0	0	-	10	59928026	59928339	-	273	protein_coding	hypothetical protein	-
SORBI_3010G262500	107.832	141.213	136.262	90.2651	58.5345	61.8902	102.366	124.956	60.6115	95.843	75.3146	122.16	69.3795	104.37	97.4737	72.3855	90.4153	48.6038	72.1081	56.6034	-	10	59901656	59905772	-	1713	protein_coding	hypothetical protein	-
SORBI_3010G262466	280.931	166.598	187.486	186.765	131.052	60.8568	139.974	179.664	101.251	125.034	70.5725	248.902	161.461	180.968	94.6908	129.192	101.104	146.049	158.272	97.4042	-	10	59895315	59897394	-	669	protein_coding	hypothetical protein	-
SORBI_3010G262433	417.194	406.182	378.31	365.056	179.658	201.71	268.615	330.072	213.57	263.014	258.722	409.883	248.597	278.586	344.164	215.419	296.739	272.444	311.963	181.215	-	10	59893889	59895004	-	739	protein_coding	hypothetical protein	-
SORBI_3010G262400	0	0	0.679043	0.196112	0	0.0450636	0	0.0480311	0	0.0470257	0	0.0945293	0	0	0	0	0	0	0	0	-	10	59891081	59891988	+	908	protein_coding	hypothetical protein	-
SORBI_3010G262300	40.4074	12.7422	116.509	14.682	5.62321	6.50096	5.7852	9.3746	5.03424	48.9513	10.2848	7.00565	11.7992	7.27924	7.06357	5.13988	8.24708	24.2769	18.0667	28.6399	-	10	59880031	59884762	-	1605	protein_coding	hypothetical protein	-
SORBI_3010G262200	36.9954	2.55777	5.26292	36.83	0.716326	33.5026	11.7004	5.29761	58.9477	12.2519	7.55482	2.56427	4.26639	3.72861	54.6211	55.7495	12.7231	0	2.66944	7.88844	-	10	59870379	59872083	-	1523	protein_coding	hypothetical protein	zf-B_box
SORBI_3010G262100	4.54425	3.6836	1.3749	5.0466	8.24567	4.38939	4.64535	4.38874	6.5298	4.3536	4.10008	3.50628	7.00887	4.4676	6.45699	4.69277	3.71626	5.62468	5.93706	5.87668	-	10	59857228	59860319	-	3011	protein_coding	hypothetical protein	-
SORBI_3010G262000	11.4275	23.1237	8.48979	14.3405	8.51121	10.2749	15.1332	17.727	15.257	6.57955	5.25587	5.03457	7.07847	21.6646	19.2337	13.8156	18.8349	8.93691	10.8808	8.90185	-	10	59851073	59853622	-	1577	protein_coding	hypothetical protein	Dus
SORBI_3010G261900	0.38871	0	0	0.188554	0	0	0	0	0.0285188	45.8733	0.0555473	0	0	0.0739303	0	0	0	0	0	0	-	10	59847394	59851087	+	3148	protein_coding	hypothetical protein	-
SORBI_3010G261800	0	0.415893	0.738629	1.53473	1.68648	0.571877	0.0552225	0.152384	1.59981	317.634	2.0529	13.7056	15.9118	0.227691	0.173738	0.561704	0.381438	38.3189	24.1072	20.624	-	10	59837462	59842467	-	1431	protein_coding	Floral homeotic protein APETALA 3 [Source:Projected from Arabidopsis thaliana (AT3G54340) UniProtKB/Swiss-Prot;Acc:P35632]	SRF-TF
SORBI_3010G261700	0.335951	0.0204243	0.0665017	12.2119	10.271	2.28608	0.149157	0.098782	0.186401	5.85121	0.594099	0.307818	2.89316	0.0527141	0.469269	1.24568	0.0171712	0.0447085	2.05386	4.80647	-	10	59801733	59804530	+	2649	protein_coding	hypothetical protein	-
SORBI_3010G261600	28.5041	18.9554	25.6418	21.4434	15.3702	15.9461	20.8029	17.744	20.3276	27.0906	15.9598	18.3975	17.7473	17.7951	16.4906	21.1196	18.7016	24.0466	15.0517	18.6263	-	10	59774435	59780254	-	2566	protein_coding	hypothetical protein	-
SORBI_3010G261500	68.409	11.8598	89.6316	98.345	13.2289	13.8062	14.4503	17.1346	30.8245	17.658	6.86341	6.02536	3.3993	8.72525	8.78821	14.4847	17.8535	1.2686	4.64303	7.84327	-	10	59769659	59774729	+	2614	protein_coding	Lysophospholipid acyltransferase LPEAT2 [Source:Projected from Arabidopsis thaliana (AT2G45670) UniProtKB/Swiss-Prot;Acc:Q8S8S2]	Acyltransferase
SORBI_3010G261400	0.833822	1.52674	4.73807	1.51794	1.00578	1.33506	1.51566	0.769175	1.56358	2.63576	0.956041	1.09751	0.954985	1.78552	0.723494	1.24976	1.82507	0.835505	1.02809	0.834888	-	10	59760365	59762632	+	2268	protein_coding	hypothetical protein	-
SORBI_3010G261300	2.6558	1.96688	0.609354	3.40584	3.82077	1.54857	1.81158	1.37841	2.96538	1.47699	2.48584	2.98062	4.14336	2.43088	2.94754	3.40875	2.7704	4.03237	3.76308	3.5251	-	10	59751381	59758752	-	7372	protein_coding	hypothetical protein	-
SORBI_3010G261200	45.3532	0	0.0817083	10.1864	3.37342	0.227743	0	0.0809133	0.166563	1.50517	2.0763	3.90148	0.618212	0	0.046126	0	0	2.08741	1.99662	1.02968	-	10	59750058	59751724	+	1078	protein_coding	hypothetical protein	-
SORBI_3010G261100	33.7791	0.354946	1.73356	47.897	13.3849	71.7883	1.66638	4.57786	26.1255	27.9727	38.6108	35.9178	24.3588	2.26843	31.6424	7.6522	4.22039	0.110996	20.9565	6.91492	-	10	59745307	59746373	-	1067	protein_coding	hypothetical protein	-
SORBI_3010G261000	35.9846	0.177681	0.867798	40.0585	32.5167	99.5061	1.62199	0.572903	8.10797	40.1753	64.0303	46.5103	43.1339	0.0764311	40.1709	9.65586	1.41912	3.50048	41.2328	21.6575	-	10	59740434	59741042	-	609	protein_coding	hypothetical protein	-
SORBI_3010G260900	0.165538	0.107349	0.34953	0	0.22958	0	0.82316	1.34125	0.0445324	2.0333	0.20817	0.0851514	0.771334	1.06207	0.887925	0.293786	0.947635	1.17493	0.77107	0.647758	-	10	59738054	59739321	+	1008	protein_coding	hypothetical protein	-
SORBI_3010G260800	6.88345	0.126633	0.360779	2.86538	9.83662	1.38867	0.786072	0.752815	0.499055	6.25874	3.25374	2.09685	1.15362	0.340451	0.85831	0.631236	0.971478	0.519746	1.20695	4.06894	-	10	59730292	59735479	-	3418	protein_coding	hypothetical protein	Cyclin_C
SORBI_3010G260700	2.85235	8.05518	7.62548	0.163652	0.227871	0	3.26813	8.22464	0.309406	0.776994	0.0192846	0.0236649	0.137807	4.55584	0.041128	0.209951	1.88116	0	0.131872	0.180022	-	10	59725977	59729603	+	3627	protein_coding	KAR-UP F-box 1 [Source:Projected from Arabidopsis thaliana (AT1G31350) TAIR;Acc:AT1G31350]	-
SORBI_3010G260600	1.67059	0	0	0.0524352	0.0146023	0.0361464	0.0523565	0.211897	0	0.0377203	0.139025	0.151648	0.17171	0.513986	0.0878512	0.0373721	0.241094	0	0.0528159	0.11536	-	10	59709324	59713263	+	2264	protein_coding	hypothetical protein	Pkinase
SORBI_3010G260500	26.7759	21.1917	31.9946	25.2298	20.617	27.8456	31.8817	29.2975	40.9597	24.7133	24.6989	32.0464	34.5125	30.683	30.9278	35.0614	35.9313	60.253	52.3632	39.8622	-	10	59706329	59709209	+	1828	protein_coding	hypothetical protein	-
SORBI_3010G260400	2.52727	4.51035	1.09151	1.85002	2.48288	2.22797	3.35323	2.98063	2.12391	3.01445	2.39017	4.60911	4.35863	2.77916	2.57675	2.04933	3.21121	9.51732	8.30695	2.89324	-	10	59702634	59706098	-	2663	protein_coding	hypothetical protein	-
SORBI_3010G260300	13.5224	4.80184	18.0085	11.9791	3.69911	7.61066	7.26812	7.02599	8.91462	5.20297	9.23998	7.21557	6.00258	13.0887	9.21944	8.79809	14.7225	4.19753	6.11185	11.1501	-	10	59696142	59700239	+	3414	protein_coding	hypothetical protein	-
SORBI_3010G260200	2.92975	2.24533	1.54652	3.1739	7.54592	10.7764	4.91925	3.79388	5.15879	5.79321	10.1317	11.6453	9.44068	2.006	2.34134	5.4021	0.798645	11.4369	14.5532	8.85872	-	10	59690318	59691570	-	1253	protein_coding	hypothetical protein	-
SORBI_3010G260100	111.972	49.4178	14.3335	57.4872	24.2523	24.164	42.8821	33.8825	34.4618	16.4746	27.0326	66.8526	56.0462	37.4449	48.4187	34.5881	41.8452	178.893	151.744	44.729	-	10	59685549	59688889	-	762	protein_coding	hypothetical protein	-
SORBI_3010G260000	1.08086	5.90875	2.36208	0.945831	4.86963	3.03743	2.87162	3.08489	3.55899	2.02461	3.41163	2.85219	1.3598	2.56883	1.50737	1.89083	1.76784	0.966611	1.41743	2.03013	-	10	59675474	59684491	+	2573	protein_coding	hypothetical protein	PPR
SORBI_3010G259900	100.251	21.1454	8.07735	35.5103	19.381	30.5097	32.7395	20.9015	33.7155	11.3741	24.9313	35.3732	25.7066	23.883	31.3216	37.6405	30.0429	51.7174	58.8085	21.6696	-	10	59669184	59672829	-	916	protein_coding	hypothetical protein	-
SORBI_3010G259800	2.65282	0.114688	0	0.157278	0.437991	0	0.0628167	0.0693358	0	0.113141	0.315068	0.204688	0.323739	0.0740008	0.105403	0.0672578	0	0.188288	0.190104	0.726642	-	10	59663387	59665273	+	1887	protein_coding	hypothetical protein	-
SORBI_3010G259700	0.518912	0.157737	0.154079	0.0346103	0.424088	1.33609	0.506856	0.432308	0.497309	0.672235	0.428236	0.225217	0.647651	0.271408	2.63841	1.6034	1.27309	1.51926	1.53391	0.837591	-	10	59660313	59662027	-	1715	protein_coding	hypothetical protein	-
SORBI_3010G259600	35.9573	3.74874	9.14027	4.74394	0.362238	5.07681	1.75721	2.75475	9.6345	16.9256	6.14246	3.27785	2.66673	2.52008	19.9023	9.54354	9.70417	0.114502	1.38727	0.778562	-	10	59653093	59656195	+	3103	protein_coding	hypothetical protein	-
SORBI_3010G259500	5.90337	0.388807	0.292144	0.196871	0	0	0.0436835	0.048217	0.421839	1.15659	0.193326	0.0711713	0.245599	0.154383	0.329843	0.233859	0.377168	0	0	0.072188	-	10	59644294	59646102	-	1809	protein_coding	hypothetical protein	-
SORBI_3010G259400	0	0	0	0	0	0	0	0	0	0	0	0	0	0	0	0	0	0	0	0.099382	-	10	59637185	59637841	+	657	protein_coding	hypothetical protein	-
SORBI_3010G259300	30.0103	21.5585	30.7817	31.3953	0.409829	15.9178	6.83408	14.5203	60.9203	0.630156	3.79868	6.0549	3.96686	11.4306	17.3182	5.04465	11.385	0	0.105881	0.963607	-	10	59634426	59636119	+	1694	protein_coding	hypothetical protein	-
SORBI_3010G259266	0.250544	0	0	0	0	0	0	0	0	0	0	0	0	0	0	0	0	0	0	0	-	10	59631819	59632220	-	222	protein_coding	hypothetical protein	-
SORBI_3010G259233	0.212293	0	0.168095	0.623019	0	0.0780874	0	0	0.256996	0	0	0	0	0	0	0	0	0	0	0	-	10	59624461	59625508	+	1048	protein_coding	hypothetical protein	-
SORBI_3010G259200	1.17028	0	0	1.69987	0.173896	0.0956582	0	0	0	0.174691	0.224838	0	0	0	0.0290612	0	0	0	0	0	-	10	59619225	59620935	-	1711	protein_coding	hypothetical protein	-
SORBI_3010G259100	0.577995	7.67662	31.7192	0.877777	1.05706	1.19384	1.54762	2.26602	0.592057	0.853304	1.2021	0.994862	0.643703	4.24165	0.993681	0.57489	1.29078	0.473353	1.09921	1.17435	-	10	59616184	59619167	-	2502	protein_coding	hypothetical protein	-
SORBI_3010G259001	5.85483	0	3.09058	1.04135	0.144998	0	1.21308	0.573845	0.59064	0.187278	0.613554	0	0.243579	0.612454	0	0.556647	0	0	0	2.57739	-	10	59614732	59614965	-	228	protein_coding	hypothetical protein	-
SORBI_3010G258900	0.111353	0	0	0	0	0	0	0	0	0.0427421	14.8782	25.303	10.2289	0	0	0	0	5.92757	12.2687	1.11111	-	10	59605883	59606881	-	999	protein_coding	hypothetical protein	-
SORBI_3010G258800	65.4656	61.1565	119.037	85.8302	29.5318	39.7151	42.6423	47.9874	29.7154	54.3496	54.7718	57.4228	50.7454	50.7699	47.6268	34.574	52.462	69.7732	47.5627	52.7776	-	10	59597310	59600431	+	1565	protein_coding	F-box protein SKIP31 [Source:Projected from Arabidopsis thaliana (AT5G45360) UniProtKB/Swiss-Prot;Acc:Q9FHK0]	-
SORBI_3010G258700	3.70806	2.35838	0.4517	11.1611	1.29978	0.384697	1.45214	3.61572	1.45792	1.27733	2.80976	3.22789	1.89867	2.1483	2.29494	2.74803	3.22682	3.84654	0.868709	1.84163	-	10	59594673	59595842	+	1170	protein_coding	hypothetical protein	-
SORBI_3010G258600	2.28075	2.68373	0.69906	2.55171	2.23021	1.19073	1.95991	2.39406	1.2766	1.52498	3.05316	2.92353	2.49765	1.63159	1.57853	1.53888	1.50418	3.05482	1.89802	2.02964	-	10	59592488	59593999	+	1512	protein_coding	Pentatricopeptide repeat-containing protein At2g36730 [Source:Projected from Arabidopsis thaliana (AT2G36730) UniProtKB/Swiss-Prot;Acc:Q9ZQA1]	-
SORBI_3010G258500	89.2237	18.875	22.4501	158.994	6.87259	24.0846	8.4342	20.3385	57.2415	14.1141	15.808	23.6031	10.771	8.08215	21.9014	18.4485	6.64816	6.83901	7.40499	12.0915	-	10	59584770	59591049	-	2511	protein_coding	hypothetical protein	-
SORBI_3010G258400	0	0.0780721	0	0	0	0	0	0.0629325	0	0	0.0504655	0	0	0	0	0	0	0	0	0	-	10	59576884	59577756	+	693	protein_coding	hypothetical protein	-
SORBI_3010G258300	35.5404	157.842	100.026	109.118	2.34549	91.8859	92.0461	132.736	154.097	24.0244	18.2636	6.41721	8.10472	105.153	110.344	148.458	72.6109	1.75495	5.39619	6.91935	-	10	59571819	59575164	-	2227	protein_coding	hypothetical protein	DUF6
SORBI_3010G258200	0	0	0	0	0	0	0	0	0	0	0	0	0	0	0	0	0	0	0	0	-	10	59569105	59569257	+	153	protein_coding	hypothetical protein	-
SORBI_3010G258100	39.2572	56.1007	33.7775	39.8284	30.5031	38.1276	31.0816	23.8373	36.0687	28.6964	41.5983	51.409	38.8264	41.5401	29.7119	53.4131	42.4167	37.9235	59.7666	41.1272	-	10	59567484	59570328	+	2845	protein_coding	hypothetical protein	-
SORBI_3010G258000	482.467	102.414	190.113	346.113	134.033	216.5	190.943	226.086	109.75	285.564	266.066	340.806	322.159	248.599	238.419	188.491	232.715	425.144	563.879	277.721	-	10	59562891	59565130	+	663	protein_coding	hypothetical protein	Pro_isomerase
SORBI_3010G257900	0	0	0	0	0	0	0.162935	0	0	91.8696	0.865301	0.840629	0.0572536	0	0	0	0	0.122096	0.0616367	0	-	10	59559402	59561045	+	970	protein_coding	hypothetical protein	Pro_isomerase
SORBI_3010G257800	0	0	0	0	0	0	0	0	0	71.0563	0	0.0411865	0	0	0	0	0	0	0	0	-	10	59556025	59557988	+	1042	protein_coding	hypothetical protein	Pro_isomerase
SORBI_3010G257700	0.0873855	1.31753	3.45961	0.279764	0.701185	0.192857	0.806995	0.445373	0.246835	152.584	0.824178	0.337127	0.872522	0.219387	0.117181	0.63142	0.678902	0.930345	0.187864	0.666789	-	10	59553126	59555274	+	1273	protein_coding	hypothetical protein	Pro_isomerase
SORBI_3010G257600	52.9029	64.396	76.2451	40.9178	30.4633	32.9199	31.0991	51.0712	55.9346	32.9374	32.4092	44.7887	63.7744	33.3868	20.3061	35.808	28.181	102.104	81.1776	46.0363	-	10	59550227	59552733	+	573	protein_coding	hypothetical protein	-
SORBI_3010G257500	2.9044	4.70865	0.741843	2.86619	14.0703	5.92745	4.81417	3.62415	8.16616	8.82277	9.17024	6.09648	10.3214	2.45669	1.95433	4.917	2.37521	11.7036	7.45247	12.5749	-	10	59542554	59549519	+	1781	protein_coding	hypothetical protein	-
SORBI_3010G257400	8.29613	11.4489	4.91859	7.45775	8.13736	9.31999	10.7997	9.26079	11.016	9.44343	11.3577	13.7799	20.8107	7.01105	8.43953	10.7861	6.04926	41.8561	30.5747	20.3414	-	10	59540546	59542423	-	1361	protein_coding	hypothetical protein	-
SORBI_3010G257300	1.17081	1.82318	2.07691	0.949149	1.17078	1.01287	1.40285	1.35931	0.920564	2.00207	1.06791	1.02745	0.993417	1.32041	1.25781	0.997529	1.11774	0.492177	0.675169	0.89662	-	10	59527063	59540146	-	11069	protein_coding	hypothetical protein	Abhydrolase_3
SORBI_3010G257200	0	0	0	0	0	0	0	0	0	0	0	0	0	0	0	0	0	0	0	0	-	10	59531155	59531827	+	538	protein_coding	hypothetical protein	-
SORBI_3010G257100	84.8144	31.4192	69.4476	43.0075	29.1769	43.9076	91.7657	99.5207	9.90848	42.585	33.3404	34.8059	36.3512	63.6943	209.015	53.5207	185.6	45.1712	30.6257	47.3344	-	10	59522251	59527741	+	2614	protein_coding	hypothetical protein	Pkinase
SORBI_3010G257000	5.04959	6.15817	6.80305	10.496	16.373	10.7562	6.21051	7.12097	14.4155	8.70766	10.7335	3.83804	4.06361	2.58592	3.63833	6.56361	4.12953	0.160478	3.07849	11.1035	-	10	59494002	59503568	-	1476	protein_coding	hypothetical protein	Response_reg
SORBI_3010G256932	3.87006	8.49204	2.35169	3.26558	7.81019	5.9589	7.57627	8.4684	15.7982	3.83465	3.81982	2.63887	1.88715	7.98371	3.54021	10.6105	7.87549	1.91639	1.40278	2.27156	-	10	59489908	59492671	-	1236	protein_coding	hypothetical protein	MatE
SORBI_3010G256866	2.93406	6.67764	2.04531	2.09741	5.77416	5.05017	5.81406	7.61728	11.0352	3.38405	3.59259	1.6248	1.40172	6.6965	2.97439	7.68797	5.01706	0.209245	0.57343	0.906403	-	10	59476398	59480359	+	3962	protein_coding	hypothetical protein	-
SORBI_3010G256800	5.02787	9.56316	3.05691	4.40744	8.21819	7.19941	9.27999	12.6014	17.7526	4.85925	6.20982	2.63248	2.6894	10.1809	2.96978	10.4482	9.76546	1.05146	1.78542	1.58097	-	10	59475314	59476671	-	1239	protein_coding	hypothetical protein	-
SORBI_3010G256700	2.33445	15.5335	13.823	1.96772	4.87648	10.2917	15.6821	18.5299	16.6558	6.15556	7.59442	3.60246	2.61803	13.1938	10.6465	11.3097	9.68386	0.252138	2.63662	2.46243	-	10	59469735	59474747	-	3288	protein_coding	hypothetical protein	MatE
SORBI_3010G256600	93.5279	1.17909	1.87593	131.355	7.18828	10.9641	2.28968	1.94408	46.2004	6.74646	12.5583	2.69954	3.41083	1.75212	9.4325	4.84026	1.93751	1.81843	2.75396	10.0253	-	10	59466358	59468456	+	2019	protein_coding	hypothetical protein	-
SORBI_3010G256500	16.3638	0.431263	0.191482	3.9141	0.359343	0.385457	0.17179	0.379237	1.56134	0.123766	0.963014	18.255	0.080487	0	0.324286	0.245247	0.0988836	0	1.38638	0.331201	-	10	59459000	59460379	+	1380	protein_coding	hypothetical protein	DUF295
SORBI_3010G256466	0.448555	0.436322	0	0.718025	0.0444349	0	0.0531071	0	0	5.85394	0.752099	0.403782	0.298581	0	0	0.284309	0.122275	0	0.241079	0.614325	-	10	59455056	59456306	+	744	protein_coding	hypothetical protein	-
SORBI_3010G256433	2.02626	4.9275	3.2088	6.27083	4.09481	2.98126	7.34097	9.0561	4.74234	10.2665	5.66951	6.95729	5.3614	5.25662	8.06087	5.77939	8.53389	6.25602	10.9992	5.70877	-	10	59451629	59454636	+	549	protein_coding	hypothetical protein	-
SORBI_3010G256400	11.1743	0.0609507	0.0661521	1.71628	0.608306	0	0	0.0163771	0.0168564	0.144309	1.79919	1.32149	1.00103	0.0873949	0	0	0.0341618	0.622629	0.202061	0.441341	-	10	59445734	59448545	-	2663	protein_coding	hypothetical protein	-
SORBI_3010G256300	0	0	0	0	0.0552835	0	0	0	0	0.142807	0	0.358832	0	0	0	0	0	0	0	0	-	10	59441716	59442313	-	598	protein_coding	hypothetical protein	-
SORBI_3010G256200	7.46133	1.9955	0.707377	4.78455	8.03381	4.73439	3.04388	2.50362	3.89872	5.94387	9.96542	17.9605	20.8301	3.15664	5.28001	5.98967	3.34181	28.569	17.5522	11.6915	-	10	59436871	59440540	-	3362	protein_coding	hypothetical protein	CUE
SORBI_3010G256100	0	0	0	0	0.0335971	0	0	0	0	1.08484	0	0.0436141	1.80605	0	0	0	0	0	25.5191	57.3977	-	10	59435479	59436462	+	984	protein_coding	hypothetical protein	-
SORBI_3010G256000	0.625516	1.4603	0	0.160207	1.21947	0.736262	2.02624	1.7853	0.585592	0.941191	0.928198	0.675695	0.39972	0.816606	0.805244	1.12281	0.961702	0.479485	0.43032	0.822417	-	10	59432239	59434461	-	2223	protein_coding	hypothetical protein	-
SORBI_3010G255900	4.57923	5.3778	4.95238	2.56259	4.64692	5.54608	9.16386	9.67701	5.67869	30.9099	4.49447	4.65357	4.07041	12.0105	4.94243	5.43681	11.8283	5.82652	5.16238	6.49007	-	10	59429547	59431651	-	996	protein_coding	hypothetical protein	-
SORBI_3010G255800	0.588136	1.28041	0.70962	0.777077	2.18067	1.75126	2.0492	1.09799	2.89313	2.58002	1.62008	1.31817	2.06932	0.937493	1.47719	2.36449	1.14518	1.61011	1.47512	2.03838	-	10	59424506	59427930	-	1986	protein_coding	hypothetical protein	-
SORBI_3010G255700	13.8679	14.331	20.8279	5.7288	8.63271	16.1038	15.1267	15.1532	17.7148	14.63	12.1888	13.0935	12.9237	11.281	13.5707	18.8275	8.41439	21.845	14.6183	11.4133	-	10	59419411	59423054	-	1865	protein_coding	hypothetical protein	-
SORBI_3010G255600	0.597156	122.564	34.3815	1.18349	3.82821	21.463	73.9026	80.4686	37.4531	19.9089	10.4596	8.91895	3.27935	8.81671	4.61394	1.49236	3.69752	0	4.21814	1.55223	-	10	59417648	59419347	+	1304	protein_coding	hypothetical protein	-
SORBI_3010G255500	1.40615	1.41846	0.412367	1.11155	2.6621	7.08782	3.81058	1.51091	3.32042	3.59826	4.12598	0.924227	0.572	1.56898	5.16792	12.1608	8.17734	0	0.223924	1.03932	-	10	59415061	59417357	+	1068	protein_coding	hypothetical protein	-
SORBI_3010G255400	0.266812	0.240997	0.211263	0.579635	3.66447	0.455655	0.41292	0.194264	0.699823	1.49963	1.96522	2.47043	3.76774	0.239232	0.613348	0.210185	0.233783	3.89568	3.46209	2.87486	-	10	59373143	59382962	-	5837	protein_coding	hypothetical protein	zf-TAZ
SORBI_3010G255300	0.151739	18.3517	122.818	1.96116	2.31487	5.95348	15.51	15.8506	7.79667	3.63702	1.54774	1.97735	2.81131	9.07227	1.62782	1.46189	2.68865	1.50778	3.47961	4.90843	-	10	59366953	59372327	-	3299	protein_coding	hypothetical protein	NmrA
SORBI_3010G255200	0.376544	0	0	0	0	0.0395723	0.15285	0	0	0.0825906	0.135291	0	0	0.090032	0.0480888	0	0.263945	0	0	0.126294	-	10	59363071	59364104	-	1034	protein_coding	hypothetical protein	-
SORBI_3010G255100	15.1552	107.755	101.954	20.1234	14.6867	25.5772	68.0097	100.946	36.6148	22.5548	19.8137	32.7928	20.9373	68.944	20.6865	21.5948	36.7854	18.7347	26.1857	17.8364	-	10	59356247	59360431	-	2870	protein_coding	hypothetical protein	-
SORBI_3010G255000	15.6057	0	0	2.17225	21.8885	0.424277	0.0120499	0	0.0410692	9.05034	28.7865	9.04397	6.70701	0	0.0303286	0.0645093	0	3.21455	4.4125	6.0734	-	10	59352516	59355794	+	3279	protein_coding	hypothetical protein	-
SORBI_3010G254900	8.34313	10.0092	6.34187	10.8623	15.1082	12.9096	11.3201	9.22399	11.0651	13.9627	13.3945	17.0378	16.7163	7.75	13.8232	10.9993	10.6438	30.1412	14.1099	15.1156	-	10	59343881	59348367	+	2000	protein_coding	hypothetical protein	zf-CCCH
SORBI_3010G254801	0.144202	2.9657	0.554588	0.010992	0.312229	0.356136	0.658528	0.541115	0.282632	0.245126	0.25258	0.127159	0.0411378	0.146535	0.0276243	0.00783429	0.0252703	0	0.0664307	0.0725489	-	10	59338060	59343744	-	5400	protein_coding	hypothetical protein	-
SORBI_3010G254700	0	0	0	0	0	0	0	0	0	0	0	0	0	0	0	0	0	0	0	0	-	10	59338866	59342131	+	1689	protein_coding	hypothetical protein	-
SORBI_3010G254500	0.872795	0	0	0.169349	1.27334	0.175112	0	0	0	5.90847	0.798233	1.22443	0.158448	0	0.212798	0.0603497	0	0.168948	0.255867	0.745153	-	10	59324042	59326430	-	701	protein_coding	hypothetical protein	-
SORBI_3010G254401	1.83988	1.44552	0.672378	0.528622	1.34594	0.208233	1.05566	1.05424	0.799544	1.62975	1.51281	2.51164	2.7556	2.90176	0.379571	1.02264	0.983804	3.61627	2.05377	2.32599	-	10	59314161	59315373	-	786	protein_coding	hypothetical protein	-
SORBI_3010G254300	4.61306	0.205523	2.70462	0.450953	3.26514	0.116575	0.112569	0.179474	0.184727	0.391985	1.66062	0.760783	0.351605	0.235753	0.0314807	0.0535678	0.460768	0.0749812	0.227113	0.0413384	-	10	59308285	59312489	+	3159	protein_coding	hypothetical protein	Myb_DNA-binding
SORBI_3010G254200	13.1129	6.82293	4.17099	3.5623	9.02461	8.01984	11.6564	9.51982	10.9465	3.76282	3.00221	0.902014	1.23757	2.20415	1.38506	6.06349	1.83144	0.0899718	1.74109	0.644838	-	10	59294356	59299852	-	3949	protein_coding	hypothetical protein	SBP
SORBI_3010G254100	0.15249	0.0741658	0	0.0406831	0.0453181	0	0.0270814	0	0	125.054	0.119851	0	0.0380645	0.0638061	0	0.086988	0	0	0	0	-	10	59292400	59294322	-	1459	protein_coding	hypothetical protein	Pkinase
SORBI_3010G254000	0	0	0	0	0	0	0	0	0	0.0387296	0	0	0	0	0	0	0	0	0	0	-	10	59281171	59290737	-	2205	protein_coding	hypothetical protein	-
SORBI_3010G253901	0	0	0	0.0804291	1.65746	0	0.160617	0	0	0.231433	0.0473883	0.465217	0.451513	0	0	0	0	0	0.162026	0.265423	-	10	59279382	59284759	+	738	protein_coding	hypothetical protein	-
SORBI_3010G253800	9.42211	11.9738	13.116	8.06829	7.54227	8.97173	11.3083	13.7331	10.9769	5.86241	8.86259	7.15272	7.32135	12.7176	9.30623	9.01586	10.8745	8.65595	9.14783	5.66417	-	10	59275189	59277847	+	1464	protein_coding	hypothetical protein	-
SORBI_3010G253700	0.251678	0.163209	0	0.179055	1.19673	0.370297	0.089393	0.361791	0.270822	0.805041	0.659363	0.712035	0.544471	0.59675	0.487488	0.7338	0.445946	1.33974	1.12722	1.28027	-	10	59272070	59273968	+	1326	protein_coding	hypothetical protein	-
SORBI_3010G253600	0	0	0	0	0	0	0	0	0	0.0585725	0	0	0	0	0	0	0	0	0	0	-	10	59264080	59269370	+	1458	protein_coding	hypothetical protein	-
SORBI_3010G253500	0	0	0	0	0	3.21497	0	0	0	0.00802619	0	0	0	0	4.92565	36.1264	1.21411	0	0	0	-	10	59240849	59256917	-	5320	protein_coding	hypothetical protein	-
SORBI_3010G253400	13.45	7.59855	6.04572	3.44733	6.21394	15.5548	9.84663	6.72375	14.6469	31.1566	10.3404	15.0003	11.0251	8.74898	9.34618	12.6871	8.54973	15.7577	18.2456	10.0664	-	10	59229924	59232193	-	947	protein_coding	hypothetical protein	-
SORBI_3010G253300	13.392	5.92204	21.8076	17.4131	8.46257	9.65745	3.83663	8.20709	45.9624	9.53684	3.90554	3.8953	2.35762	3.70131	12.9488	15.0578	7.22682	1.16313	2.25399	3.49586	-	10	59219948	59227992	+	6313	protein_coding	hypothetical protein	Auxin_resp
SORBI_3010G253250	0.243151	0	0.192528	0	0	0	0	0	0	0	0	0	0	0	0	0.0462352	0	0	0	0.0713596	-	10	59207765	59209743	+	915	protein_coding	hypothetical protein	-
SORBI_3010G253200	19.4578	0.145797	0.021578	6.55803	9.20031	1.68402	0.77436	0.587622	0.967713	12.155	8.48184	7.48565	6.19032	0.490324	0.219262	0.35237	0.445727	8.23982	5.6536	4.65472	-	10	59191922	59200323	+	4082	protein_coding	hypothetical protein	GHMP_kinases
SORBI_3010G253100	3.9914	10.1737	4.62355	2.56358	4.34936	5.00257	7.16724	5.73769	6.02492	6.24177	6.46006	11.5774	12.0666	4.9794	6.70693	5.95927	5.10778	22.7423	21.6507	13.6662	-	10	59187424	59189492	+	1505	protein_coding	hypothetical protein	Rhomboid
SORBI_3010G253000	0.278104	2.29942	1.15607	1.66941	1.48768	4.98685	3.90178	2.80754	8.19218	3.25583	4.06556	4.26481	1.52724	4.01464	6.24655	5.73764	5.00351	0	2.61571	2.53014	-	10	59183067	59186140	-	1600	protein_coding	hypothetical protein	-
SORBI_3010G252900	0.834977	0.313807	0.150259	0.344273	14.46	0.558414	0.242651	0.297593	0.153151	2.59314	1.38411	0.99567	0.909495	0.20645	1.11968	0.837154	0.496611	0	1.36669	2.56186	-	10	59178130	59182614	+	2931	protein_coding	hypothetical protein	MBD
SORBI_3010G252800	0.154502	0	0.122335	0	0	0.0568302	0.219509	0.0605726	0	0.830265	0	0	0	0	0	0.0587572	0.126351	0	0	0.272058	-	10	59175467	59176186	+	720	protein_coding	hypothetical protein	GST_C
SORBI_3010G252700	6.7085	5.136	0	2.00686	8.856	2.78017	3.17275	4.09751	2.02845	2.92899	3.01292	5.46918	4.15256	2.05797	2.69957	2.99822	2.21813	3.4267	2.85721	2.37741	-	10	59165928	59172810	+	3076	protein_coding	hypothetical protein	Cullin
SORBI_3010G252600	0.191184	0.0531342	0.0216257	0	0.836026	0.0502305	0	0	0.011021	112.341	1.18493	0.958847	0.409055	0	0.0610407	0	0.0335034	0.0290775	0.176148	0.240464	-	10	59153204	59161871	-	4073	protein_coding	hypothetical protein	-
SORBI_3010G252550	0	0	0	0	0.301914	0	0	0	0	1.55979	0.0798461	0	0.126795	0	0	0	0	0	0	0.0745365	-	10	59151131	59152891	-	876	protein_coding	hypothetical protein	-
SORBI_3010G252500	10.0499	1.05343	0	0.138684	0	2.645	0.52313	0.713284	8.32049	10.0097	0.871591	0	0	1.52255	11.0755	2.53699	0.106277	0	0.139691	0	-	10	59141850	59143133	-	1284	protein_coding	hypothetical protein	Auxin_inducible
SORBI_3010G252401	61.2083	0	0	1.62621	0.754784	2.24207	0.0902094	0.199143	2.56214	4.28943	7.82492	28.7088	2.15551	0	2.04344	0.482936	0	0	14.1961	1.34166	-	10	59139791	59140228	+	438	protein_coding	hypothetical protein	Auxin_inducible
SORBI_3010G252301	0	0	0	0	0	0	0	0	0	0	0	0	0	0	0	0	0	0	0	0	-	10	59126171	59127417	+	621	protein_coding	hypothetical protein	-
SORBI_3010G252200	2.3333	0.460067	0	0.908521	4.61035	1.1366	0.873558	0.890046	1.17057	3.29201	2.87473	3.84398	2.45568	0.158322	1.32484	1.72674	0.747793	1.2085	2.44031	2.62805	-	10	59123073	59126604	-	1764	protein_coding	hypothetical protein	-
SORBI_3010G252100	0.377945	0.0612729	0	0.0336108	0.748801	0	0.223736	0.0246955	0.0254183	1.18475	0.495082	1.23937	1.35224	0	0.0844685	0	0.0772703	0.536502	1.52347	3.06874	-	10	59120197	59122722	-	1766	protein_coding	hypothetical protein	-
SORBI_3010G252000	0.340536	0.736108	0.119839	0.444166	2.20397	1.05774	0.779482	0.919714	1.03824	1.56855	3.61621	1.57652	0.491135	1.51989	0.744166	0.690697	1.48527	0	0.89478	1.15486	-	10	59118692	59120161	+	1470	protein_coding	hypothetical protein	-
SORBI_3010G251900	0.0550565	0.0267775	0	0.0146886	1.47259	0.0607539	0	0.0323773	0.0111083	0.295863	0.865444	0.116822	0.206147	0	0	0.0523449	0	0	0.3107	0.484736	-	10	59113958	59117998	-	4041	protein_coding	hypothetical protein	Agenet
SORBI_3010G251800	0	0	0	0	0.320577	0	0	0	0	0.15527	0.127173	0	0.201949	0	0	0	0	0	0	0	-	10	59113489	59114313	+	825	protein_coding	hypothetical protein	-
SORBI_3010G251700	0	0.170444	9.15699	0	0	0	0	0.431804	0	0.0192166	0	0	0	1.613	0	0	0	0	0	0	-	10	59102008	59104437	-	2222	protein_coding	hypothetical protein	-
SORBI_3010G251600	576.641	183.585	45.5388	219.579	154.863	84.8974	115.417	119.919	67.73	98.0633	123.76	273.38	232.647	170.481	95.7944	123.807	174.272	379.791	331.557	143.025	-	10	59099207	59100732	-	735	protein_coding	hypothetical protein	-
SORBI_3010G251501	0	0	0	0	0	0	0	0	0	0.428161	0.0637604	0	0	0	0	0	0	0	0.109002	0.0595205	-	10	59096781	59098200	+	1097	protein_coding	hypothetical protein	-
SORBI_3010G251400	6.13661	3.10207	9.40152	8.14822	3.89984	2.89732	3.14674	4.04784	2.50651	7.24227	8.81121	5.46733	5.29588	2.87083	1.56317	3.40088	3.83366	12.5347	7.76881	10.4392	-	10	59084506	59091185	-	6680	protein_coding	hypothetical protein	-
SORBI_3010G251300	8.09433	14.9888	159.595	8.4942	3.33513	3.10831	10.7343	56.9548	36.1346	11.6742	7.11071	4.35178	4.15151	44.4524	16.4513	17.3935	60.0478	1.20913	3.3313	4.98264	-	10	59060126	59069078	-	5779	protein_coding	hypothetical protein	Beta-lactamase
SORBI_3010G251200	44.8985	18.6421	38.5714	10.0453	24.0299	14.3146	23.0111	25.9656	11.714	15.7177	20.4243	41.6623	33.831	22.1965	22.0972	13.3405	18.0358	57.9667	31.8835	34.237	-	10	59042340	59060009	-	2464	protein_coding	UDP-sugar pyrophosphorylase [Source:Projected from Arabidopsis thaliana (AT5G52560) UniProtKB/Swiss-Prot;Acc:Q9C5I1]	-
SORBI_3010G251100	318.224	155.944	124.497	200.704	199.113	365.394	265.897	181.025	291.383	125.17	112.964	216.794	199.805	224.469	634.801	525.111	253.273	251.267	220.249	244.916	-	10	59035964	59040060	-	2056	protein_coding	hypothetical protein	DEAD
SORBI_3010G251000	32.1144	20.0743	28.3313	40.5395	17.8125	31.0852	28.1355	24.1136	36.3483	25.2939	18.4578	21.2405	15.1206	23.3554	38.3781	46.4461	29.7627	17.5456	22.3281	19.3032	-	10	59020575	59027965	+	4536	protein_coding	hypothetical protein	UQ_con
SORBI_3010G250900	15.9044	13.3558	58.0371	125.706	14.7108	13.8145	14.0803	8.26706	20.8519	108.366	27.7253	55.3833	85.527	11.054	8.83979	43.6077	18.1702	79.1455	83.8787	214.43	-	10	58983188	58990737	-	3735	protein_coding	hypothetical protein	E1-E2_ATPase
SORBI_3010G250800	17.1845	5.72039	1.53355	5.1108	18.8792	9.58504	6.09123	6.69577	7.51697	7.74509	9.76443	7.11875	7.66499	8.10402	10.1053	8.53067	6.55155	4.61135	4.93972	5.74604	-	10	58976016	58980799	-	3159	protein_coding	hypothetical protein	-
SORBI_3010G250700	0.0406288	0.237125	0	0.0433577	0.338082	0.0298888	0	0.063714	0.0327894	0.0935705	0.12773	0.313486	0.283968	0.0340004	0	0.185413	0	1.12464	0.262035	0.190779	-	10	58971767	58975660	-	1369	protein_coding	hypothetical protein	-
SORBI_3010G250600	17.9736	15.8295	13.1545	7.62047	3.06053	22.2278	41.3061	42.5838	6.19424	3.58003	21.1363	55.7724	10.8162	60.8154	32.657	31.1469	44.8111	5.89578	21.0431	25.0911	-	10	58967131	58968275	-	1145	protein_coding	hypothetical protein	-
SORBI_3010G250500	0.690466	1.86565	0.0607459	0.573099	1.43638	1.21342	1.33522	2.37612	0.8049	0.647852	1.08536	0.887923	1.11072	0.834627	1.47457	1.60468	1.38028	0.816778	0.412328	0.990668	-	10	58958505	58959954	+	1450	protein_coding	hypothetical protein	-
SORBI_3010G250400	29.5849	0.681739	5.19516	7.25648	40.3451	2.24883	1.46183	1.00554	1.09514	16.4501	10.623	13.6688	12.7003	0.187184	0.746523	1.07748	0.195116	7.6521	7.37327	11.956	-	10	58950659	58957087	+	3730	protein_coding	hypothetical protein	Peptidase_S8
SORBI_3010G250300	2.76769	0	0.11534	0	0.0432906	0	0	0	0	2.19927	0.183183	0.936628	0.921156	0.0203171	0.0434079	0	0.0595632	1.18898	0.548031	3.64803	-	10	58944614	58948185	+	2291	protein_coding	hypothetical protein	-
SORBI_3010G250200	8.88443	2.20586	10.3307	14.7522	7.18244	4.53626	1.88676	3.77542	8.09776	5.03187	3.96506	2.66055	3.0862	1.57278	1.84676	7.61989	1.58777	2.74502	2.53776	5.5065	-	10	58938352	58944377	+	3581	protein_coding	Aminodeoxychorismate synthase, chloroplastic [Source:Projected from Arabidopsis thaliana (AT2G28880) UniProtKB/Swiss-Prot;Acc:Q8LPN3]	GATase
SORBI_3010G250100	8.56469	4.8893	2.46126	8.6106	19.5959	9.07392	7.14123	10.7605	12.5966	6.57499	11.0407	20.5651	24.6643	6.72462	7.86357	8.35037	8.70787	40.4164	25.344	26.203	-	10	58934310	58937530	+	1682	protein_coding	hypothetical protein	-
SORBI_3010G250000	22.2999	9.94727	5.03518	9.69791	10.4835	5.02582	7.03549	8.43945	5.92967	7.25675	7.74017	15.2006	16.9247	9.29492	16.3441	9.49374	10.7347	21.5915	17.4121	15.5102	-	10	58928662	58931250	-	2589	protein_coding	hypothetical protein	Ribosomal_L2_C
SORBI_3010G249900	0.379324	1.33027	0.22131	1.03331	3.86249	1.67431	1.63805	1.39321	2.39267	1.73955	2.03358	1.10141	1.36548	0.910548	2.44514	1.89052	1.23267	0.828945	1.31979	1.17182	-	10	58923047	58928618	+	5572	protein_coding	hypothetical protein	-
SORBI_3010G249800	0.0750619	0.584118	0	0	0.0892296	0.0276098	0.213289	0.235424	0.0605785	0.115248	0.0235982	0	0.0374737	0.502527	0	0	0	0	0.201713	0.044058	-	10	58919549	58921194	-	1482	protein_coding	hypothetical protein	UDPGT
SORBI_3010G249700	0.243951	2.74211	11.7185	2.42981	4.34994	1.675	1.03978	0.212535	2.55944	1.62307	1.82362	0.773832	0.649544	0.930023	0.993507	0.412331	0.28817	0	1.01977	0.127279	-	10	58909557	58911684	-	2052	protein_coding	hypothetical protein	-
SORBI_3010G249600	2.0849	31.4174	2.63014	1.28216	2.68845	8.44871	16.2164	13.5215	14.7157	5.88676	7.55444	11.5607	4.51627	5.14555	2.14817	2.31146	2.62978	2.85924	8.20465	4.77053	-	10	58905821	58908080	-	1574	protein_coding	hypothetical protein	MIF
SORBI_3010G249500	8.33383	5.06659	10.6051	48.2397	15.3909	10.551	11.761	10.6624	10.5091	18.8791	6.31612	3.32996	9.08265	9.58952	19.4405	12.069	10.0253	3.76292	11.6376	17.0987	-	10	58902075	58907045	+	2990	protein_coding	hypothetical protein	Pkinase
SORBI_3010G249400	0	0.906965	5.1679	0.03827	0	0	0.280225	1.65901	0.0578835	0.192711	0.0225484	0.0553402	0.0716132	1.32047	0.38471	0	0.293272	0.076359	0.0770955	0	-	10	58896933	58898483	+	1551	protein_coding	hypothetical protein	-
SORBI_3010G249300	8.09159	6.36517	4.0113	6.75788	7.27687	8.2819	9.77171	5.35153	9.65348	5.64463	6.61405	3.8003	3.86399	9.15621	14.0271	7.97403	7.94071	1.64802	3.85726	2.72575	-	10	58891476	58894709	-	1581	protein_coding	Probable inactive purple acid phosphatase 28 [Source:Projected from Arabidopsis thaliana (AT5G57140) UniProtKB/Swiss-Prot;Acc:Q9LU72]	Metallophos
SORBI_3010G249200	43.7393	34.9488	36.3571	23.6416	34.3257	28.7643	31.643	31.4379	23.7623	27.4729	30.1211	43.5007	48.3045	29.7106	30.596	27.6154	28.1435	95.6534	53.936	55.9028	-	10	58885974	58890374	-	1175	protein_coding	hypothetical protein	CCT
SORBI_3010G249100	22.6877	21.3494	38.7687	30.5037	18.2154	19.4281	15.1772	17.1215	19.3414	9.36253	12.7993	14.2016	15.6916	19.9994	27.0565	20.9735	22.8624	21.6721	26.5562	26.186	-	10	58876038	58882148	-	2481	protein_coding	hypothetical protein	-
SORBI_3010G249000	0.369668	0.55321	0.855598	0.121384	0.94649	0.993658	2.63613	2.40804	0.734375	0.807708	1.33203	0.427847	0.298123	3.47433	2.83446	1.24363	3.54636	0.0302742	0.519626	0.350505	-	10	58868877	58872972	-	3912	protein_coding	hypothetical protein	NB-ARC
SORBI_3010G248900	1.33674	1.15806	0.281147	2.56328	1.06764	0.9296	1.42438	1.67865	1.40751	2.5254	1.38551	0.934715	1.16786	1.15361	2.02592	2.24791	1.62269	1.66776	1.29095	0.809126	-	10	58861988	58867857	-	5326	protein_coding	hypothetical protein	NB-ARC
SORBI_3010G248800	12.2674	3.90473	4.32271	1.13093	26.5316	3.52006	5.01881	4.07921	5.15753	5.47301	6.23934	10.1096	5.451	2.87557	3.2154	12.0907	3.41411	7.38496	8.69889	7.61512	-	10	58858142	58861480	+	1732	protein_coding	hypothetical protein	-
SORBI_3010G248700	0.823217	8.99411	27.5278	2.71192	3.2549	9.11917	15.6877	22.8632	16.8982	7.54703	7.70417	3.28638	3.02577	14.1776	13.4069	13.4302	15.1719	0.45727	3.07787	2.99719	-	10	58850824	58855716	-	4662	protein_coding	hypothetical protein	NB-ARC
SORBI_3010G248600	0.0351586	0.991791	7.90618	0.1876	0.104487	2.89683	3.39671	2.72921	2.04297	1.21458	2.76332	1.41065	0.842519	5.38433	3.30025	5.00067	8.39573	0	1.05819	1.11437	-	10	58849013	58850823	-	1582	protein_coding	hypothetical protein	-
SORBI_3010G248500	2.05351	2.05458	1.11496	1.62793	5.84703	3.78389	4.54301	4.32442	4.68774	2.23706	4.95568	1.85608	1.17165	3.02782	7.01099	4.9832	3.74256	0.333144	1.28236	2.29585	-	10	58843914	58847055	-	2844	protein_coding	hypothetical protein	NB-ARC
SORBI_3010G248400	0.237517	0.0543622	0.154878	0.05964	0.166087	0.0308348	0.0496253	0.0876408	0.0225515	0.139435	0.237192	0.0646817	0.0418508	0.0935374	0.0749417	0.0637606	0.0799812	0	0	0.082007	-	10	58838481	58842677	-	3981	protein_coding	hypothetical protein	NB-ARC
SORBI_3010G248301	4.08546	28.3608	43.4777	4.61283	20.6695	71.4753	36.5897	49.1881	36.9102	17.2874	20.9888	4.19588	9.38363	33.5942	25.8404	38.9538	21.0043	15.5278	15.0631	28.0393	-	10	58830678	58837386	+	3989	protein_coding	hypothetical protein	-
SORBI_3010G248200	0.678045	23.9706	56.0702	0.203509	0.390418	65.4529	89.6201	86.6596	14.0908	12.3625	0.0133229	0	0.12694	42.2554	65.4839	61.6124	28.141	1.35352	1.8221	5.74587	-	10	58827900	58830677	+	2625	protein_coding	hypothetical protein	-
SORBI_3010G248150	0	0	0.605074	0	0	0.963716	0.271425	0.89878	0	0	0	0	0.654006	0.0913573	0.243983	0.0415164	0.0892767	2.67317	0.0586728	0.448536	-	10	58824370	58825475	+	1019	protein_coding	hypothetical protein	-
SORBI_3010G248100	3.01733	0.517947	0.91349	12.2407	8.10994	12.6491	2.72657	1.14815	7.10842	10.1681	25.1518	25.2499	21.5764	1.02116	8.94513	7.81304	1.81438	31.3679	16.3838	20.1846	-	10	58816982	58819488	+	2507	protein_coding	hypothetical protein	Exo70
SORBI_3010G248000	51.5261	17.2602	187.691	36.3545	6.05078	23.8059	23.4727	25.3736	20.5625	47.6766	40.0147	45.9441	19.0799	17.0861	19.3709	19.9414	42.1843	12.473	18.7065	23.7676	-	10	58800207	58801356	-	978	protein_coding	hypothetical protein	-
SORBI_3010G247900	16.8737	2.53296	17.4844	22.0087	1.23819	2.29875	1.70181	2.12344	1.84935	43.7389	13.3603	4.42022	4.056	3.22513	2.79347	1.82213	5.7071	3.10498	3.91866	3.79048	-	10	58796217	58796773	-	534	protein_coding	hypothetical protein	-
SORBI_3010G247800	10.1895	15.6144	12.0576	12.3731	14.0555	13.8896	12.8534	12.6893	13.8619	13.3009	11.0176	7.02385	6.86369	14.319	16.343	17.0246	13.4032	3.35018	4.65093	6.51951	-	10	58771249	58782848	+	5939	protein_coding	E3 ubiquitin-protein ligase BRE1-like 1 [Source:Projected from Arabidopsis thaliana (AT2G44950) UniProtKB/Swiss-Prot;Acc:Q8RXD6]	-
SORBI_3010G247750	0	0	0	0	0	0	0	0	0	0	0	0	0	0	0	0	0	0	0	0	-	10	58771792	58773024	-	1233	protein_coding	hypothetical protein	-
SORBI_3010G247700	0	0	0	0	0	0	0.0959022	0	0	0	0	0.17361	0	0	0	0	0	0	0	0	-	10	58767418	58768653	+	1236	protein_coding	hypothetical protein	RRM_1
SORBI_3010G247600	0.124223	0.181253	82.5734	3.24788	0.0738348	0.0456927	0.0441225	0.146105	0.175444	21.3854	0.605333	1.82113	4.89933	0.181924	0	0.118105	0.0761917	1.85155	7.01027	32.3736	-	10	58763664	58766316	-	1791	protein_coding	hypothetical protein	PP2C
SORBI_3010G247500	0	0.434411	0.771517	0	0.0241311	0.119468	0.951742	1.43252	0	0.0311674	0	0	0	0.747463	2.86728	1.42047	0.763641	0	0	0.14298	-	10	58751560	58753232	-	1370	protein_coding	hypothetical protein	Homeobox
SORBI_3010G247400	31.1611	24.2001	1.98979	20.6497	15.7829	14.6663	17.4351	15.3037	19.267	7.87752	11.719	21.1996	17.5223	17.0694	18.4218	25.9947	17.1602	30.5892	25.4367	15.291	-	10	58744884	58748971	-	1328	protein_coding	hypothetical protein	-
SORBI_3010G247300	0.0517885	0	1.14818	0.331602	0	0	0.0735786	0.203037	0	0	1.62815	1.35862	0.879062	0.216697	0.0925955	0	1.05881	0.110273	0	0.303976	-	10	58739506	58740592	-	1074	protein_coding	hypothetical protein	AAA
SORBI_3010G247200	22.0047	3.16836	123.952	79.3634	1.75864	10.298	5.06923	2.53446	1.62538	11.0709	41.6326	27.4918	10.5511	5.43078	10.0248	1.51293	5.34776	4.3413	13.5237	33.9167	-	10	58733000	58735236	+	2237	protein_coding	hypothetical protein	AAA
SORBI_3010G247100	0	0	0	0	0	0	0	0	0	0	0	0	0	0	0	0	0	0	0	0	-	10	58712018	58714104	-	450	protein_coding	hypothetical protein	-
SORBI_3010G247000	0	0.0763102	0.0828223	0	0.699426	0	0	0.0410082	0	0.602248	0.279518	0	0.10444	0	0	0	0	0.0556807	0	0.122791	-	10	58709632	58711758	+	2127	protein_coding	hypothetical protein	-
SORBI_3010G246900	0.988948	0.495564	1.28136	1.15132	3.27746	1.23459	1.57536	1.55087	1.28184	3.95705	5.20067	1.89609	1.7355	1.27903	0.669771	0.888956	1.39694	1.34003	1.73951	2.95512	-	10	58700687	58703977	+	1856	protein_coding	hypothetical protein	-
SORBI_3010G246800	0.0762975	0	0	0	0.0453492	0	0	0	0	1.46431	0.0479734	0	0.228543	0	0	0	0	0	0.0820132	0	-	10	58698237	58698965	-	729	protein_coding	hypothetical protein	-
SORBI_3010G246700	48.9943	3.5315	0.446548	97.5737	141.31	1336.52	17.7026	0.082913	15.3327	78.0386	410.252	125.268	43.4293	0.0884915	157.333	1.82304	4.38146	0.150105	16.8224	26.399	-	10	58679152	58680848	-	1578	protein_coding	hypothetical protein	-
SORBI_3010G246650	0	0	0	0	0	0	0	0	0	0	0	0	0	0	0	0	0	0	0	0	-	10	58670196	58671399	+	1108	protein_coding	hypothetical protein	-
SORBI_3010G246600	0.852427	28.1575	20.2486	3.60082	0.0633325	59.8873	2.97725	1.92161	5.47493	6.0259	0.312654	1.86354	1.48947	12.8701	8.2873	7.42907	4.29885	19.8901	1.29807	4.16948	-	10	58623190	58624755	-	1566	protein_coding	Xyloglucan endotransglucosylase/hydrolase [Source:Projected from Arabidopsis thaliana (AT2G18800) UniProtKB/TrEMBL;Acc:A0A178VQ29]	-
SORBI_3010G246500	0.133784	0.455475	0.476689	0.249848	8.82648	2.38667	0	0	0.0269926	3.23519	6.49822	2.63227	4.30797	0	0	0.0254391	0	0	2.04924	2.3165	-	10	58620021	58622697	+	1663	protein_coding	hypothetical protein	-
SORBI_3010G246400	452.446	5.60273	5.92202	478.844	64.8417	279.974	2.16795	0.303331	68.9981	10.8233	529.994	335.735	239.226	0.251797	92.4924	32.726	4.28852	328.939	46.9892	275.204	-	10	58611150	58612443	+	1294	protein_coding	hypothetical protein	-
SORBI_3010G246300	2.69964	0.0200459	0.293714	4.90424	6.7246	2.50146	0.102476	0	0.0498948	3.38557	2.91546	1.36747	4.83548	0	1.1975	0.0783719	0	7.37189	3.1677	4.54808	-	10	58599534	58602232	-	2699	protein_coding	ATL43 [Source:Projected from Arabidopsis thaliana (AT5G05810) UniProtKB/TrEMBL;Acc:A0A178ULT1]	-
SORBI_3010G246200	11.0529	5.28901	9.52805	11.0343	3.86754	8.19667	3.83086	2.09674	5.3593	3.96885	6.64143	7.15272	9.52301	4.47563	5.17956	4.0678	4.59238	11.9572	12.9348	26.1071	-	10	58587672	58591266	-	1248	protein_coding	hypothetical protein	ABC_tran
SORBI_3010G246132	0.213789	0.277278	0.733543	0.570372	0	0.131063	0.379677	0.111755	0.258807	79.3262	0.134424	0.0549856	0.213463	0.119274	0.222977	0.108405	0.320532	0	0.191504	0.0418283	-	10	58585340	58586900	+	1561	protein_coding	hypothetical protein	-
SORBI_3010G246066	0	0	0	0.335033	0	0	0	0	0	0	0.0328999	0	0.0522446	0	0.187107	0	0	0	0	0	-	10	58580781	58581843	+	1063	protein_coding	hypothetical protein	-
SORBI_3010G246000	32.615	36.4367	64.7398	52.4237	2.34822	21.7208	5.82254	14.223	20.0702	3.33682	14.7533	21.1887	7.45544	10.5746	44.7486	21.1939	14.3962	7.4537	5.43979	11.2073	-	10	58568569	58576821	-	7166	protein_coding	hypothetical protein	-
SORBI_3010G245900	0.578781	0.168899	0.824905	1.7912	1.27284	8.77114	0.698958	0.272293	1.8217	0.39989	2.32908	10.316	3.4096	0.43592	3.51844	0.66033	1.70397	0.739435	1.8042	1.35888	-	10	58565236	58566196	+	961	protein_coding	hypothetical protein	-
SORBI_3010G245800	11.3872	2.5038	8.99424	29.9471	10.6429	44.8902	5.94265	2.54478	9.14482	7.17384	21.3389	126.417	32.545	1.49848	89.4178	9.66124	18.1671	13.1658	24.3902	45.5219	-	10	58564023	58568053	+	1988	protein_coding	hypothetical protein	-
SORBI_3010G245701	0	0	0	0	0	0	0.0489612	0	0	0	0	0	0	0	0	0	0	0	0	0	-	10	58551225	58552031	+	807	protein_coding	hypothetical protein	-
SORBI_3010G245601	0	0	0	0	0	0	0	0	0	0	0	0	0	0	0	0	0	0	0	0	-	10	58550372	58551325	-	864	protein_coding	hypothetical protein	-
SORBI_3010G245500	0	0	0.200185	3.46247	0	0.464975	3.59197	0.991187	5.203	1.16453	0.0529888	0	0	4.40782	30.9644	20.4795	20.779	0	0	0.494652	-	10	58538761	58540482	+	1320	protein_coding	hypothetical protein	-
SORBI_3010G245400	3.4763	0	0	0	0	0	0	0	0	0	0	0	0	0	0	0	0	0	0	0	-	10	58532162	58533861	+	1344	protein_coding	hypothetical protein	-
SORBI_3010G245300	0	0	0	0	0	0	0	0	0	0	0	0	0	0	0	0	0	0	0	0	-	10	58527310	58528695	-	954	protein_coding	hypothetical protein	-
SORBI_3010G245200	0.0518368	455.118	1245.87	2.93188	4.46751	22.2321	59.9856	101.938	38.5298	13.7689	21.6745	20.1583	12.8877	185.232	20.112	27.1258	78.3825	0	27.9157	9.43203	-	10	58523600	58525015	-	1073	protein_coding	hypothetical protein	-
SORBI_3010G245100	5.43092	108.432	117.199	1.12967	2.92708	56.7973	92.1013	158.426	17.0677	11.3417	29.1559	11.9853	5.62943	91.1095	31.332	32.4159	68.4273	3.773	5.83776	5.07872	-	10	58518406	58521179	-	2417	protein_coding	hypothetical protein	Pkinase
SORBI_3010G245000	4.98718	6.13133	5.31999	3.47418	7.59587	5.01918	5.53557	4.94236	5.72987	6.59367	6.27155	7.45557	8.12638	3.73879	3.18901	4.8996	3.82358	12.6102	7.33385	7.60273	-	10	58512766	58516205	-	1606	protein_coding	hypothetical protein	DTW
SORBI_3010G244900	1.94205	2.79965	2.45593	2.11722	4.95769	2.08649	2.67977	2.59636	2.49194	3.82911	4.1816	4.02104	4.54779	2.19813	3.21	2.06159	2.12522	4.55168	3.16885	3.24748	-	10	58507618	58512060	-	3981	protein_coding	hypothetical protein	-
SORBI_3010G244800	0.158314	0.461988	0.0835688	1.12631	0.533219	0.388214	0.0374874	0.124134	0.0851777	0.364605	1.02861	0.32574	1.10651	0.220809	0.235881	0.160551	0.776809	0.337095	0.51052	0.309744	-	10	58506522	58507596	+	1054	protein_coding	hypothetical protein	-
SORBI_3010G244701	1.82551	4.71675	0.63238	1.09582	3.01774	2.18228	2.91779	2.99694	3.45297	2.62765	2.08042	2.33289	2.16448	2.10056	2.44794	3.12407	2.5659	0.850287	1.59434	1.87511	-	10	58505260	58506250	+	975	protein_coding	hypothetical protein	-
SORBI_3010G244600	0.041648	17.7241	9.66226	0.222226	0.53222	2.32853	5.14791	8.1477	3.71411	3.7248	3.12933	1.89597	1.62179	4.89688	1.00527	1.63139	1.66892	2.39437	2.14886	1.05116	-	10	58500655	58503624	+	2671	protein_coding	hypothetical protein	-
SORBI_3010G244500	5.66374	3.40798	8.99789	1.27857	0.151055	5.07466	5.674	4.22743	3.06192	0.641048	0.273937	0.0140066	0.0181253	5.02836	1.83381	0.856045	3.14724	0.038653	0	0	-	10	58496713	58500282	-	3064	protein_coding	hypothetical protein	-
SORBI_3010G244400	0.665321	1.52734	0	0.454405	0.632719	0.724382	1.13431	0.918153	0.429557	0.306455	0.468532	0.903501	0.451729	0.62359	1.11819	0.647735	0.544096	0.113333	0.543524	0.593582	-	10	58494610	58496699	+	2090	protein_coding	Pentatricopeptide repeat-containing protein At5g44230 [Source:Projected from Arabidopsis thaliana (AT5G44230) UniProtKB/Swiss-Prot;Acc:Q9FFG8]	-
SORBI_3010G244300	0	0.0644862	0.104984	0.070747	0	0	0	0	0	0.356252	0	0	0	0	0	0	0	0	0	0	-	10	58493141	58494083	-	839	protein_coding	hypothetical protein	-
SORBI_3010G244200	0	0.0694531	0.33921	0	0	0.052526	0	0.0559849	0	0.054813	0.0448942	0	0	0	0	0	0	0	0	0	-	10	58492239	58493140	-	779	protein_coding	hypothetical protein	-
SORBI_3010G244150	0	0	0	0	0	0	0	0	0	0	0	0	0	0	0	0	0	0	0	0	-	10	58490754	58491907	+	408	protein_coding	hypothetical protein	-
SORBI_3010G244100	0.170991	16.3951	24.6025	27.5277	0.159708	0.0539101	0.0520576	0.153227	0.019714	0.843861	0.122873	0.0188477	0	0.122652	0	0.0743174	0.0599295	0	0	0	-	10	58485077	58487702	-	2277	protein_coding	hypothetical protein	Lipase_GDSL
SORBI_3010G244000	2.23419	2.50177	2.22158	1.13668	3.9375	1.01291	1.60557	1.32405	1.32087	2.37329	2.31953	3.2072	2.23078	1.10877	0.55739	0.731103	0.934799	3.319	3.01591	2.86671	-	10	58481908	58486099	+	2141	protein_coding	hypothetical protein	-
SORBI_3010G243900	7.57401	16.8434	21.4174	8.69005	6.9243	11.47	11.4861	11.4182	12.1914	16.3769	11.5611	15.2719	15.2168	12.6627	14.2528	10.7577	11.1971	20.2615	12.9903	12.6737	-	10	58474320	58480965	-	6646	protein_coding	hypothetical protein	-
SORBI_3010G243800	0	0	0	0	0.440127	0.0371417	0	0	0	0.0129196	0.0211635	0	0	0	0.376126	0.0256007	0.0275258	0	0	0.0197561	-	10	58462771	58466075	-	3305	protein_coding	hypothetical protein	-
SORBI_3010G243700	4.63507	14.4752	8.69226	9.24194	9.27987	13.1009	12.824	12.6246	17.7192	11.4239	11.2741	3.38813	9.25601	9.79927	7.74208	6.77254	9.47635	9.8694	13.3735	7.87537	-	10	58460151	58461094	+	456	protein_coding	hypothetical protein	-
SORBI_3010G243600	5.0437	15.5361	7.98724	7.02711	9.4099	10.719	12.8388	10.2165	14.9252	8.81951	9.16159	4.75647	4.05679	7.03474	9.76941	9.48403	8.13486	2.68488	8.13232	7.23661	-	10	58450666	58458395	+	397	protein_coding	hypothetical protein	-
SORBI_3010G243400	11.1682	9.56139	22.3326	11.3899	9.90806	12.2632	11.8157	15.5008	15.1997	11.1781	8.87864	9.90485	13.4949	13.9655	16.9681	15.9568	15.1921	19.6412	15.6319	14.7251	-	10	58426619	58430208	+	3033	protein_coding	hypothetical protein	-
SORBI_3010G243300	0.788277	0.153356	2.09718	1.27866	0.168671	0.0695881	0	0.0741705	0.254471	0.653562	0.0991287	0.0973159	0.062966	0.105548	0.14094	0.0239825	0	0	0.135573	0	-	10	58421249	58424607	+	1764	protein_coding	hypothetical protein	-
SORBI_3010G243200	26.4363	23.6784	38.4968	19.902	14.4295	15.3321	17.2457	17.6245	22.3387	14.1159	16.4783	25.5478	26.4613	29.4612	22.9899	24.313	26.6765	33.1612	27.0451	25.964	-	10	58416758	58419820	+	1700	protein_coding	hypothetical protein	-
SORBI_3010G243100	1.20577	0	0	2.82256	8.62323	6.92455	1.3539	0.182988	3.39019	11.1078	13.8178	4.83184	4.93222	0.1953	1.39088	0.798769	0.827027	9.19304	3.80467	2.32867	-	10	58411830	58416468	-	1430	protein_coding	Replication protein A2c, Reguration of meiotic crossove [Source: Projected from Oryza sativa (Os06g0693300)]	-
SORBI_3010G243000	0.268844	0.46491	0.520353	1.30699	0.514891	2.46122	1.33686	3.41965	2.82061	2.61425	0.694944	0.29963	0.477216	1.12492	1.46875	0.159042	0.488576	0.190816	1.47703	1.82346	-	10	58405877	58408490	+	1862	protein_coding	hypothetical protein	Pkinase_Tyr
SORBI_3010G242900	10.9956	3.58479	3.75289	13.138	8.82145	14.1613	9.03084	7.67683	15.333	5.56579	2.85388	0.82129	1.12295	7.08408	17.5501	15.7642	9.13999	0	1.70544	2.61695	-	10	58396493	58403156	-	5539	protein_coding	hypothetical protein	NB-ARC
SORBI_3010G242800	0.522171	0	0.0153132	0.0103193	0	0	0.0206076	0	0	0	0	0	0	0	0	0	0	0	0	0	-	10	58392113	58398000	-	5752	protein_coding	hypothetical protein	NB-ARC
SORBI_3010G242700	0	0	0	0	0	0	0	0	0	0.450415	0	0	0	0	0	0	0	0	0.126134	0.137751	-	10	58388495	58389400	+	474	protein_coding	hypothetical protein	CUE
SORBI_3010G242600	0.146757	0	0	0	0.0290761	0.179937	0.695017	0.153429	0.789598	9.27594	0.553656	0.717159	1.61186	0.286566	1.57437	1.78597	1.96028	3.43737	2.15593	0.574266	-	10	58384624	58385918	+	1137	protein_coding	hypothetical protein	DUF295
SORBI_3010G242500	0	0	0.0275858	0	0	0	0	0.0136587	0.0140585	0	0	0	0	0	0	0	0	0	0	0	-	10	58377637	58382697	+	3193	protein_coding	hypothetical protein	-
SORBI_3010G242400	1.19301	17.304	32.7052	0	0.204849	2.32088	13.9929	13.6158	3.63731	2.58476	1.83364	1.02279	0.900012	45.8588	15.8557	5.86788	36.3588	0.169351	0.655441	1.21376	-	10	58357402	58362154	+	2098	protein_coding	hypothetical protein	Pkinase
SORBI_3010G242300	2.83152	3.2812	4.93241	0.578064	1.58785	2.21887	5.74572	7.77066	2.42427	1.24752	1.95066	0.873904	0.491687	12.3011	7.80305	2.5282	13.5513	0.262136	0.436696	0.231232	-	10	58346786	58356659	+	4518	protein_coding	hypothetical protein	Pkinase
SORBI_3010G242200	3.52541	0.117575	0.15951	2.12833	6.46583	0.237119	0.357766	0.268529	2.11356	2.76827	6.13066	3.93257	3.96255	0.35403	0.0360187	2.16046	0.197696	8.32161	3.63793	3.12163	-	10	58341359	58345359	-	2761	protein_coding	hypothetical protein	-
SORBI_3010G242100	0.789789	0.249681	0.125071	0.927119	1.38482	0.71174	0.196366	0.232227	0.90829	2.60713	2.04845	0.975024	0.966016	0.181758	0.211816	0.315374	0.242207	0.210211	0.318358	0.741714	-	10	58339539	58342447	+	2817	protein_coding	hypothetical protein	p450
SORBI_3010G242000	0.845068	1.0213	0.0811064	1.39373	4.45969	1.28104	1.12787	0.542141	1.88069	6.40883	3.92878	2.213	1.76427	0.578617	0.732579	0.837533	0.565439	0.599798	1.04601	1.65339	-	10	58336385	58338809	-	2172	protein_coding	hypothetical protein	LRRNT_2
SORBI_3010G241900	2.5267	0	0	0	0	0	0	0.0131204	0	0.0128458	0.0105212	0.012911	0.0334152	0.0140032	0	0	0	0	0	0.0196432	-	10	58330630	58333953	-	3324	protein_coding	hypothetical protein	Pkinase
SORBI_3010G241800	16.8036	0	0.148661	0	0.0836951	0.0690595	0.0333432	0.184018	0.0378807	0	0.0885382	0	0	0	0	0	0	0	0	0.110201	-	10	58327365	58328549	+	1185	protein_coding	hypothetical protein	-
SORBI_3010G241700	3.34613	0.0166065	0.0540709	0.0910938	0.0101472	0	0	0	0	0.026212	0.0107344	0.0526904	0	0	0	0	0	0	0.018351	0	-	10	58320539	58323796	+	3258	protein_coding	hypothetical protein	-
SORBI_3010G241600	5.37676	4.42891	0.434792	4.98098	10.7025	2.18812	2.01541	2.29633	3.63763	5.62065	7.36568	11.881	11.5367	1.79982	0.981794	3.70671	1.59044	18.9999	13.2315	9.74978	-	10	58316738	58319870	+	2431	protein_coding	hypothetical protein	-
SORBI_3010G241500	14.2493	6.86189	18.5031	1.38543	1.90585	1.5534	4.95563	10.3634	6.63989	2.95389	2.46854	3.07752	3.62327	8.58676	3.07628	5.96032	12.7275	2.93085	1.47956	2.4421	-	10	58312085	58315836	+	3556	protein_coding	hypothetical protein	Pkinase
SORBI_3010G241450	0.497355	0.107509	0.0437564	0.0589734	0.70619	0	0.0196283	0.0649959	0.111497	1.0818	0.521201	0.255835	0.358653	0	0	0	0.0225964	0.58834	0.683117	0.291925	-	10	58309929	58312084	-	2013	protein_coding	hypothetical protein	-
SORBI_3010G241400	0.122405	0.476267	1.04674	0.287378	0	0.252134	0.121735	0.441497	1.30398	0.0375875	0.0153929	0	0.073331	0.163896	0.459595	0.521366	0.160164	0	0.10526	0.0574771	-	10	58302195	58304466	+	2272	protein_coding	hypothetical protein	-
SORBI_3010G241300	0.81946	92.0664	156.941	77.12	0	37.7905	39.9119	78.4298	114.826	8.92519	0.0322031	0	0	31.5882	66.39	155.119	73.5909	0	0	0	-	10	58299114	58300199	-	1086	protein_coding	hypothetical protein	-
SORBI_3010G241200	32.7535	5.588	131.946	66.0337	2.19691	32.4983	3.24255	14.9972	115.977	2.20505	11.3822	14.7235	7.78127	3.93167	10.7887	28.5873	13.6022	4.02994	6.74944	6.19483	-	10	58282076	58289235	-	2498	protein_coding	IAA-amino acid hydrolase [Source:Projected from Arabidopsis thaliana (AT1G44350) UniProtKB/TrEMBL;Acc:Q0WNN8]	Peptidase_M20
SORBI_3010G241100	86.8435	0	0.211904	11.2335	123.092	1.80471	0.0316854	0	0.143989	8.49193	41.0024	11.5637	18.1706	0	0.199374	0	0	6.45825	19.2739	20.7873	-	10	58276023	58277269	+	1247	protein_coding	hypothetical protein	Thaumatin
SORBI_3010G241000	2.11516	3239.61	3525.12	84.646	43.4896	280.834	1201.85	1403.45	477.369	172.271	232.519	265.205	142.477	862.356	109.567	40.8751	384.361	0	239.108	73.0649	-	10	58267930	58269475	-	1420	protein_coding	hypothetical protein	-
SORBI_3010G240900	11.1579	5.76853	42.9948	17.0362	7.25005	15.3623	12.139	12.7818	18.8038	16.4842	9.75486	11.8838	9.87806	12.1364	11.985	13.211	17.859	12.5076	7.1298	12.8674	-	10	58263110	58265088	+	1979	protein_coding	hypothetical protein	AP2
SORBI_3010G240800	3.22768	6.12783	4.30432	3.097	7.40453	5.44668	3.73093	4.40674	7.17488	5.28172	6.52454	4.50026	5.32886	6.14855	3.20186	4.78073	4.56138	5.63679	2.76949	4.22109	-	10	58247872	58258128	-	3929	protein_coding	DNA repair protein REV1 [Source:Projected from Arabidopsis thaliana (AT5G44750) UniProtKB/Swiss-Prot;Acc:A3EWL3]	IMS
SORBI_3010G240700	0.142435	0.983708	0.315785	0.182402	0.871993	0.398176	0.546385	0.603089	0.482797	0.349905	0.47466	0.351683	0.227548	0.679424	0.420201	0.411676	0.314503	0.121314	0.398074	0.685545	-	10	58243600	58247504	+	3905	protein_coding	hypothetical protein	-
SORBI_3010G240600	0	0.672099	0.364727	0.614459	0.205339	0	0	1.7156	0	0	0	0	0	1.25281	0	0	0	0	0	0.94629	-	10	58240285	58241062	+	483	protein_coding	hypothetical protein	-
SORBI_3010G240500	5.03405	10.3925	15.0419	10.7279	7.69529	9.08277	11.5812	11.914	10.8215	6.68913	7.11455	11.0112	11.6975	12.0457	4.5829	7.32993	8.92607	14.2919	8.58836	7.98781	-	10	58226427	58238798	-	3613	protein_coding	Probable cadmium/zinc-transporting ATPase HMA1, chloroplastic [Source:Projected from Arabidopsis thaliana (AT4G37270) UniProtKB/Swiss-Prot;Acc:Q9M3H5]	E1-E2_ATPase
SORBI_3010G240400	0	254.114	14.775	0	0	0.105594	63.9835	151.264	0	13.7189	0.902519	0	0	3519.22	51.2636	0	3254.25	0	0	0.0842503	-	10	58224304	58225339	-	775	protein_coding	hypothetical protein	-
SORBI_3010G240300	0	0.112133	0	0	0	0	0.0614171	0.203373	0	315.82	0	0	0	8.63402	0	0	18.2889	0	0	0	-	10	58220394	58223887	-	1930	protein_coding	hypothetical protein	Glyco_hydro_1
SORBI_3010G240200	0.115756	0	0	0	0.0344012	0	0	0	0	0	0	0	0	0.0484355	0	0	0	0	0	0	-	10	58217073	58218119	+	961	protein_coding	hypothetical protein	-
SORBI_3010G240100	0	0.110897	0	0.0608319	0.0847029	0.0524184	0.0101234	0.011174	0	0.076581	0.0537626	0.0219914	0.241894	0.0119258	0.0509596	0	0.0233085	0.0910322	0.107229	0.217479	-	10	58197289	58203871	-	3903	protein_coding	hypothetical protein	-
SORBI_3010G240001	0.704061	1.65508	0.557478	0.970494	3.05138	1.597	1.85472	1.65616	2.15447	1.39629	1.97366	0.588515	0.908026	1.17839	0.734318	1.96353	1.39146	0	0.599137	1.72189	-	10	58195914	58200373	+	1896	protein_coding	hypothetical protein	-
SORBI_3010G239900	4.4569	6.82524	19.8386	11.6657	14.3192	9.30453	8.23606	6.46982	9.33257	15.7435	13.1408	13.6161	14.6432	7.96356	6.35345	11.1088	5.49187	15.6457	16.3145	11.7013	-	10	58183612	58187447	+	1847	protein_coding	hypothetical protein	2OG-FeII_Oxy
SORBI_3010G239800	22.4536	14.9991	17.4022	18.7259	19.431	20.4221	16.0394	14.5047	16.8282	17.9675	20.5712	21.5161	21.7445	14.6008	14.5233	19.401	15.476	22.1728	20.4225	17.8368	-	10	58174502	58178673	-	2222	protein_coding	decapping 2 [Source:Projected from Arabidopsis thaliana (AT5G13570) TAIR;Acc:AT5G13570]	NUDIX
SORBI_3010G239700	0.584116	1.64143	1.74724	0.346305	0.154304	1.52785	2.9507	3.66404	1.12615	0.697539	0.285657	0.275425	0.194409	6.13741	4.78671	1.94989	5.12187	0	0.0697638	0.0380945	-	10	58168736	58173007	-	1714	protein_coding	hypothetical protein	Pkinase
SORBI_3010G239600	47.149	81.0133	199.951	109.273	129.091	293.424	218.761	167.359	326.712	84.9234	65.4789	62.8408	133.163	188.381	336.677	344.414	157.124	200.822	142.446	132.271	-	10	58158917	58166804	+	3414	protein_coding	hypothetical protein	RRN3
SORBI_3010G239500	150.447	76.8038	229.838	299.222	145.076	74.0451	73.0555	145.273	99.2071	131.434	81.623	128.352	114.415	161.916	228.304	105.836	211.375	100.75	179.086	137.163	-	10	58143791	58146445	-	1728	protein_coding	hypothetical protein	ubiquitin
SORBI_3010G239400	0	0	0	0	0	0	0	0	0	101.032	0.0221907	0.517392	0.24667	0	0	0	0	0	0.0758726	0.538593	-	10	58137843	58139795	+	1576	protein_coding	hypothetical protein	Peptidase_C1
SORBI_3010G239300	0.702579	0	0	0	0.0927987	0	0	0	0	0.0299645	0.0245422	1.32513	0.155891	0	0	0	0	0	0.125869	0	-	10	58115872	58117973	+	1425	protein_coding	hypothetical protein	Peptidase_C1
SORBI_3010G239166	0	0	0	0	0	0	0	0	0	0	0	0	0	0	0	0	0	0	0	0	-	10	58106524	58107930	+	1071	protein_coding	hypothetical protein	Peptidase_C1
SORBI_3010G239033	0	0	0	0	0	0	0	0	0	0.220668	0	0	0	0	0	0	0	0	0	0	-	10	58101055	58101670	-	387	protein_coding	hypothetical protein	-
SORBI_3010G238900	0.0257982	0	0.0817083	0.0825928	0	0.189786	0	0.0202283	0.145742	0	0.14599	0.0199055	0	0.0215893	0	0.0981103	0	0	0.0277308	0.0302848	-	10	58087656	58090215	+	2156	protein_coding	hypothetical protein	Peptidase_C1
SORBI_3010G238800	230.898	47.0619	162.795	366.606	49.3945	110.494	41.2583	50.7667	181.87	81.1623	90.5406	90.7439	69.5019	51.9419	96.5658	38.1495	55.6293	89.8135	62.2543	81.393	-	10	58082264	58086285	+	2036	protein_coding	hypothetical protein	-
SORBI_3010G238700	40.2592	20.991	29.2916	35.4356	33.4633	40.4565	35.2246	37.4873	35.738	26.3938	30.3074	30.116	35.7371	18.6492	50.331	39.7418	25.0614	74.3195	42.6854	33.6131	-	10	58075623	58081038	+	2129	protein_coding	hypothetical protein	-
SORBI_3010G238600	15.373	10.4451	31.8684	21.5992	0.11479	7.55842	1.83839	13.7197	20.2311	0.682004	11.6332	1.0431	2.46827	8.56585	22.9627	53.4397	35.4731	0	0.539749	2.35784	-	10	58064926	58066365	-	1440	protein_coding	hypothetical protein	-
SORBI_3010G238500	0	0	0	0.0608787	0	0	0	0.447305	0	0.0875884	0.0717387	0	0.2848	0	0	0	0.139958	0	0	0	-	10	58060694	58061775	-	975	protein_coding	hypothetical protein	-
SORBI_3010G238400	0	0	0.822601	0.0852826	0	0	0	1.19056	0.0967428	0.0613496	0.150744	0	0.11969	0.0668772	0.142884	0.54705	1.33976	0.170162	0.558361	0.14072	-	10	58057901	58059292	+	1392	protein_coding	hypothetical protein	UDPGT
SORBI_3010G238300	0	0	0	0	0	0	0	0	0	0	0	0	0	0	0	0	0	0.264064	0	0	-	10	58052632	58053647	-	897	protein_coding	hypothetical protein	-
SORBI_3010G238100	8.99134	3.48319	3.10438	39.9151	11.3565	9.78719	2.28381	4.38582	27.4859	14.9287	11.7178	10.1442	9.86495	0.765568	1.91605	4.95018	2.88565	4.50802	9.58062	7.94697	-	10	58028803	58031101	+	2128	protein_coding	hypothetical protein	-
SORBI_3010G238000	0	0.142005	0.693555	0.311584	0.780934	0.429583	1.24446	0.228936	1.88509	1.12072	0.55075	1.23905	1.16611	0.488677	0.391526	0.77726	0.238774	2.48678	0	0.514126	-	10	58019436	58020246	-	381	protein_coding	hypothetical protein	-
SORBI_3010G237900	8.31234	12.5777	9.4257	10.8054	16.3061	10.695	10.2303	8.55615	12.3678	11.1081	15.6151	12.8538	11.681	6.69858	6.51363	10.6413	6.96564	14.8587	11.2515	10.9626	-	10	58017656	58025166	+	1626	protein_coding	hypothetical protein	RRM_1
SORBI_3010G237800	14.9623	6.36749	2.06039	5.51045	31.7546	11.0669	9.79128	7.77879	8.30178	12.6725	20.2217	23.2777	25.454	9.11876	5.56121	8.7208	9.94185	41.5554	38.1539	18.6145	-	10	58011351	58014479	+	1368	protein_coding	hypothetical protein	-
SORBI_3010G237650	17.4385	9.99666	8.99467	12.9539	17.7153	25.8112	15.748	9.13057	17.4158	13.8394	19.0152	13.2501	12.177	9.20439	11.7686	11.212	10.2065	12.6603	12.0474	11.6851	-	10	58002386	58009970	-	2928	protein_coding	hypothetical protein	-
SORBI_3010G237500	0.131181	0	0.10387	0.209988	0.0779706	0.144756	0	0	0	0.050353	18.6823	2.63166	1.30981	0	0	0	0.107279	0	0.211513	0	-	10	58000786	58002306	+	848	protein_coding	hypothetical protein	Ras
SORBI_3010G237400	0	0	0	0	0	0	0	0	0	4.50054	2.40665	0	0	0	0	0	0	0	0	0	-	10	57997758	58000225	-	1148	protein_coding	hypothetical protein	-
SORBI_3010G237300	0	0	0	0	0	0	0	0	0	0.059971	1.86652	0	0	0	0	0	0	0	0	0	-	10	57994220	57994931	+	712	protein_coding	hypothetical protein	-
SORBI_3010G237200	0.559754	0	0	0.278763	5.02381	0.0137262	0	0.0292601	0	0.157562	0.0938547	0.273536	0.54027	0	0	0	0	0	0.340956	0.569488	-	10	57987171	57991318	-	2981	protein_coding	hypothetical protein	-
SORBI_3010G237100	0.990015	0	0	0	0.267472	0	0	0	0	0	1.24498	40.0691	21.2079	0	0	0	0	128.015	60.6583	61.9131	-	10	57985565	57986599	+	618	protein_coding	hypothetical protein	-
SORBI_3010G237000	256.128	208.47	271.02	448.807	129.348	226.55	162.053	135.716	360.679	212.9	236.126	410.481	291.953	144.522	116.573	261.819	172.721	322.17	347.751	249.076	-	10	57983185	57984902	-	572	protein_coding	hypothetical protein	-
SORBI_3010G236950	0	0	0	0	0	0	0	0.0937898	0	0	0	0	0	0	0	0	0	0	0	0	-	10	57962621	57964015	+	1395	protein_coding	hypothetical protein	-
SORBI_3010G236900	81.1418	72.8373	12.903	124.893	1.40083	278.251	134.703	64.0456	318.677	102.975	40.4344	59.5425	20.7756	39.728	161.753	113.497	34.1424	0.286762	37.4215	19.604	-	10	57958040	57958865	-	826	protein_coding	hypothetical protein	-
SORBI_3010G236800	0.312728	0.564941	0.318367	0.381408	0.305369	5.6529	1.25358	0.455389	1.82079	0.342967	0.393266	0.396416	0.133822	0.392561	2.59602	1.13833	0.584565	0	0.0720332	0.052445	-	10	57951878	57958039	+	2490	protein_coding	hypothetical protein	Pkinase
SORBI_3010G236700	0	0	0.190077	1.15281	0.542194	5.19198	8.27068	0.20705	4.88215	0.0921436	0.0603757	0.0555671	0	2.029	2.94008	0.492982	3.25885	0	0.129019	0	-	10	57946889	57950002	+	2317	protein_coding	hypothetical protein	Pkinase
SORBI_3010G236600	5.61575	3.05756	1.21408	2.80216	8.22502	6.97943	3.44468	1.83346	4.96529	2.91333	4.42279	2.73588	2.52611	2.11721	3.06704	5.69997	2.4295	2.53027	2.22504	2.15997	-	10	57933481	57944787	+	2902	protein_coding	Mitochondrial intermediate peptidase, mitochondrial [Source:Projected from Arabidopsis thaliana (AT5G51540) UniProtKB/Swiss-Prot;Acc:F4KDA5]	Peptidase_M3
SORBI_3010G236500	84.9697	6.50398	39.0745	67.1236	19.4489	48.3178	17.6542	10.0215	20.0089	20.3503	49.2221	43.1902	46.6739	20.9459	75.9081	29.5236	26.8564	39.9396	55.0809	45.3585	-	10	57929306	57932100	+	940	protein_coding	hypothetical protein	-
SORBI_3010G236400	12.6607	13.2441	17.7819	11.9587	16.4149	13.1933	11.9811	15.185	12.2357	11.9007	11.5194	12.3294	16.772	15.8262	16.9471	12.6725	14.3133	30.0075	20.9635	21.2132	-	10	57922238	57927595	+	2447	protein_coding	hypothetical protein	UCH
SORBI_3010G236300	8.74845	9.54431	11.8205	14.8392	1.46693	38.0098	23.918	13.3417	60.1754	11.7531	15.8966	8.70092	12.9023	8.73167	49.5265	38.8866	19.9208	8.88674	10.0724	11.8245	-	10	57881858	57885395	+	2772	protein_coding	hypothetical protein	Auxin_resp
SORBI_3010G236200	10.4609	5.68595	3.23877	6.88685	40.6899	12.0263	8.7073	7.42221	11.2863	12.9636	13.6241	20.2266	20.7794	6.29101	6.04098	10.1743	5.60529	23.1275	14.661	11.6475	-	10	57846887	57859463	-	4025	protein_coding	hypothetical protein	SMC_N
SORBI_3010G236100	4.18541	0.529446	0.668748	1.33195	0.0390445	0.310663	0.666639	0.448852	0.204487	1.52009	3.2099	2.8746	1.88337	1.02093	2.25674	0.521052	3.39978	0.439602	2.16878	4.74805	-	10	57839267	57846837	+	5927	protein_coding	Synaptotagmin-3 [Source:Projected from Arabidopsis thaliana (AT5G04220) UniProtKB/Swiss-Prot;Acc:Q7XA06]	C2
SORBI_3010G236000	0	0	0	0	0	0	0	0	0	0.149298	0.0203803	0.125047	0	0	0	0	0	0	0.0348413	0	-	10	57814234	57820135	-	1716	protein_coding	hypothetical protein	-
SORBI_3010G235900	0	0	0	0	0.147212	0	0	0	0	0.0271624	0	0	0	0	0	0	0	0	0	0	-	10	57808860	57810668	-	1572	protein_coding	hypothetical protein	-
SORBI_3010G235800	0.862806	1.54192	0.444856	1.04923	1.85453	1.75657	1.23296	1.21932	2.29139	1.13988	1.74737	2.05137	2.53438	0.973917	1.59647	2.08321	1.20608	4.22974	2.50193	2.50859	-	10	57797654	57804016	-	5544	protein_coding	hypothetical protein	-
SORBI_3010G235700	1.132	2.67841	1.11434	1.37128	3.16412	2.74586	2.04296	1.05552	3.1111	3.45259	3.52034	3.82422	3.97122	1.51059	3.55561	2.72261	1.77642	4.75555	3.84772	2.80139	-	10	57792211	57794295	-	1818	protein_coding	hypothetical protein	-
SORBI_3010G235600	0.742403	3.72633	1.50486	5.4508	1.90626	5.54891	5.10509	3.02701	7.30969	5.33457	7.84223	9.4173	7.1162	4.07562	8.04395	8.10868	8.18416	11.7611	10.2785	11.7829	-	10	57788653	57790758	-	1873	protein_coding	hypothetical protein	-
SORBI_3010G235550	0	0	0	0	0	0	0	0	0	0.0390662	0.0319969	0	0	0	0	0.0774111	0	0	0.109401	0.0597383	-	10	57786334	57788173	-	1093	protein_coding	hypothetical protein	-
SORBI_3010G235500	0.653568	1.86339	0.249826	0.649364	2.77282	1.26003	0.528317	0.229724	1.94615	1.73012	1.91301	3.99949	3.98293	0.45264	0.604422	0.959923	0.38704	4.1749	3.77912	3.22766	-	10	57781486	57784169	-	2468	protein_coding	hypothetical protein	F-box
SORBI_3010G235400	0	0	0	0	0.0568685	0	0	0	0	0.318286	0.32085	1.69795	0.796101	0	0	0	0	1.22236	0.171409	0.0374392	-	10	57777432	57779394	-	1744	protein_coding	hypothetical protein	F-box
SORBI_3010G235300	0	0	0.108542	0	0.0407388	0.126056	0	0	0	5.89319	0.107741	0.237983	2.94276	0	0	0	0	0	3.1312	0.402304	-	10	57774186	57775808	+	1623	protein_coding	hypothetical protein	-
SORBI_3010G235200	8.93907	16.5381	7.63312	10.1006	6.82374	18.4388	17.3486	13.4227	16.3146	13.5454	13.0229	12.8028	13.2131	13.0301	24.3135	16.8199	13.5934	20.0913	17.459	14.5403	-	10	57766917	57768820	+	1904	protein_coding	hypothetical protein	-
SORBI_3010G235100	0.250544	1.90907	1.91769	0.356497	1.47262	1.51547	2.38296	2.31376	2.90945	1.50666	1.51408	0.751787	0.847772	1.6657	2.01583	1.73625	1.99202	0.681671	0.733131	1.32353	-	10	57761853	57765848	-	3996	protein_coding	hypothetical protein	-
SORBI_3010G235000	10.1289	2.49182	35.8108	12.2547	8.37135	11.3287	6.49116	14.3912	5.60811	13.4646	8.63978	4.71042	1.97958	4.20537	3.67642	3.35187	2.63271	0.271683	2.61643	4.40132	-	10	57751593	57760184	-	5667	protein_coding	hypothetical protein	Pyr_redox_2
SORBI_3010G234900	1.85144	0.0454019	0.0492764	1.42788	0.434629	0.0915643	0	0.0243985	0.0251125	0.788296	0.860864	0.288109	0.264087	0.01302	0	0.0236672	0	0.0331281	0.13379	0.146112	-	10	57749380	57752954	-	3575	protein_coding	hypothetical protein	-
SORBI_3010G234800	10.6744	0.0308109	0.100321	0.574638	20.1257	0.932068	0.157507	0.0993445	0.230067	2.72342	6.15406	6.89203	2.1506	0.132536	0.368115	0.289101	0.0777104	0.134889	1.25976	0.892401	-	10	57746643	57748398	+	1756	protein_coding	hypothetical protein	-
SORBI_3010G234700	35.958	0	0.516103	2.89828	0	0.799175	0.463028	0	0.0876732	0	4.03005	65.3803	2.49478	0	0.0971168	0	0	2.77577	2.91932	2.67807	-	10	57743080	57743591	+	512	protein_coding	hypothetical protein	-
SORBI_3010G234600	358.466	1.99045	5.30257	71.2677	2.21134	138.765	25.5042	4.81339	42.4866	4.49843	89.0105	316.131	44.0202	11.2085	64.4414	32.8254	12.0942	23.1716	117.376	35.2675	-	10	57739069	57739666	-	598	protein_coding	hypothetical protein	-
SORBI_3010G234500	54.0758	0	0	0	0	0	0	0	0	0	0	0	0	0	0	0	0	0	0	0	-	10	57725721	57727469	-	1476	protein_coding	hypothetical protein	-
SORBI_3010G234400	8.68342	0	0	0	0	0	0	0	0	0	0.024594	0	0	0	0	0	0	0	0	0.045917	-	10	57710676	57712367	-	1422	protein_coding	hypothetical protein	-
SORBI_3010G234300	1.97124	5.64878	1.34991	0.511696	1.07665	2.07724	3.7468	2.96597	3.18176	0.572597	1.84243	1.19212	1.54267	1.51588	0.904935	1.41828	1.65564	1.9285	2.46252	7.5676	-	10	57709308	57710859	+	1044	protein_coding	hypothetical protein	-
SORBI_3010G234200	0.156931	0.0218073	0	0	0	0.0164925	0	0	0	0	0.0704809	0.017298	0	0	0.0400837	0	0	0	0	0.0526352	-	10	57686680	57689171	+	2481	protein_coding	hypothetical protein	Pkinase
SORBI_3010G234100	0.293078	0.233251	0.0253156	0.483361	0.117188	0.239125	0.246049	0.25905	0.236528	0.102269	0.221134	0.0370039	0.0159617	0.129321	0.390626	0.129696	0.187384	0	0.0630067	0.075065	-	10	57672483	57683165	-	10438	protein_coding	hypothetical protein	-
SORBI_3010G234000	59.5349	99.5245	17.8338	404.029	23.0805	332.773	113.169	29.371	59.9347	4.24358	156.945	13.8551	100.273	178.658	140.608	159.036	90.1025	110.757	13.323	41.111	-	10	57660661	57662280	+	1620	protein_coding	hypothetical protein	-
SORBI_3010G233900	2.49826	0.283267	0.0970863	8.99592	6.10358	10.1026	3.51675	1.41809	2.63469	8.51869	7.99869	3.77247	3.18311	0.346309	1.93195	1.3173	0.288286	1.99074	3.14672	4.39012	-	10	57654771	57660102	+	3629	protein_coding	hypothetical protein	Glyco_hydro_1
SORBI_3010G233800	4.5508	135.352	38.6358	3.33881	7.60745	6.99787	25.4132	39.6971	9.61536	8.273	12.2205	25.1646	16.787	24.4105	1.61037	2.01911	7.08142	50.1321	24.1189	11.8716	-	10	57650497	57653749	-	1760	protein_coding	SVR8 [Source:Projected from Arabidopsis thaliana (AT5G54600) UniProtKB/TrEMBL;Acc:A0A178U954]	KOW
SORBI_3010G233700	0	0.354674	0.26246	1.83942	0.078807	1.19486	0.447391	0.805709	0.61528	3.3335	3.81406	6.87991	6.7848	0.0832179	0.85935	0.126058	0.298183	1.83507	4.48941	2.60709	-	10	57643953	57647356	-	1678	protein_coding	hypothetical protein	Lipase_GDSL
SORBI_3010G233600	1.19525	0.838192	0	0.118654	0.495645	0.061346	1.34273	1.89618	0.0672994	0.405441	3.0411	2.25198	0.582837	2.34943	0.47214	0.10571	2.88695	0.414308	0.687214	0.228415	-	10	57642386	57644386	+	2001	protein_coding	hypothetical protein	-
SORBI_3010G233500	0.0875919	0	0	0	0	0	0	0	0	0	3.22189	9.7322	11.7194	0	0	0	0	0.279763	9.98029	5.14126	-	10	57616669	57617938	+	1270	protein_coding	hypothetical protein	Peptidase_C1
SORBI_3010G233450	1.08486	0.896983	2.11313	0.7641	1.31542	1.47646	1.56444	1.17388	1.64601	0.44973	1.00273	0.611057	0.801573	2.07902	1.17351	1.27897	1.80988	0.577496	0.501437	0.967885	-	10	57605608	57610926	-	5127	protein_coding	hypothetical protein	-
SORBI_3010G233400	12.104	8.34764	17.0889	7.21028	6.85172	11.4956	8.30269	8.386	7.85616	4.74437	13.5703	11.2912	5.91489	10.7188	5.00959	4.62751	10.9723	7.63643	6.95285	11.6529	-	10	57603554	57613155	-	1737	protein_coding	hypothetical protein	Epimerase
SORBI_3010G233300	0.0428182	0	0	0	0	0	0	0	0	0	0.0807681	0	0.171012	0	0.0382785	0	0	0	0	0	-	10	57600714	57602115	+	1299	protein_coding	hypothetical protein	-
SORBI_3010G233200	2.77821	9.92733	30.9318	41.9006	57.6941	21.3348	11.2775	7.84665	18.1431	14.4072	13.9213	17.9802	13.8699	3.32136	10.2641	11.2339	4.63674	12.4348	62.4997	29.2525	-	10	57594914	57597482	-	1962	protein_coding	HSA32 [Source:Projected from Arabidopsis thaliana (AT4G21320) UniProtKB/TrEMBL;Acc:A0A178UV51]	ComA
SORBI_3010G233100	10.718	10.8647	1.42932	6.14035	5.56581	2.90491	5.61018	7.8732	6.10049	2.16528	2.27003	0.783462	1.91504	10.7633	7.86705	7.98049	14.4855	0	1.09146	5.29769	-	10	57590975	57594201	+	493	protein_coding	hypothetical protein	-
SORBI_3010G233000	23.0284	21.7405	11.6547	20.051	40.5786	21.1575	20.3341	18.7745	23.5939	18.6419	25.5044	26.8227	31.6962	21.9109	12.1884	23.758	20.2193	42.8236	33.029	31.0545	-	10	57582952	57589737	-	1640	protein_coding	hypothetical protein	-
SORBI_3010G232900	10.7644	5.61981	4.91979	7.93943	11.2574	8.78098	11.7122	9.48743	10.7768	8.30556	9.01303	11.5439	7.64607	8.91705	13.0826	9.72128	8.37967	7.13731	7.58696	8.79757	-	10	57576175	57579836	-	2041	protein_coding	hypothetical protein	-
SORBI_3010G232800	0	0	0	0.172549	0	0	0	0	0	0	0	0	0	0	0	0	0	0	0.115867	0	-	10	57574333	57575449	-	1032	protein_coding	hypothetical protein	-
SORBI_3010G232750	2.30686	3.21192	1.09833	3.78119	1.77441	0.765337	1.92792	1.97431	2.04427	1.12275	0.872182	0.77945	0.451635	2.4983	1.25354	2.25918	3.18122	0.481565	0.615866	1.91156	-	10	57566103	57569791	+	3689	protein_coding	hypothetical protein	-
SORBI_3010G232700	0.480318	3.08364	0.130395	0.512579	1.60689	0.878324	1.85226	1.46343	1.80529	1.32744	1.14763	1.11182	1.658	1.26329	1.88933	1.73271	1.79567	0.964294	1.01785	0.918272	-	10	57561961	57566013	-	4053	protein_coding	hypothetical protein	PPR
SORBI_3010G232600	14.7911	17.6849	26.6766	30.8293	10.8825	23.8593	27.7275	23.5981	17.6363	30.3193	14.8545	7.92545	11.4867	27.958	38.7047	26.7972	28.5183	14.7631	11.7312	11.1838	-	10	57558742	57561646	+	2166	protein_coding	hypothetical protein	-
SORBI_3010G232500	214.765	0.0930687	0	120.721	0.227474	3.56623	0.249214	0.0750211	7.33559	17.6527	7.68034	2.04246	0.509505	0	1.62515	6.45251	0.0782451	0.814905	0.685638	1.0483	-	10	57553551	57557300	+	1744	protein_coding	hypothetical protein	-
SORBI_3010G232400	4.35727	14.599	7.11925	7.36608	10.7705	11.5701	13.1476	12.614	16.857	7.74132	6.9232	4.82421	4.99976	9.42275	6.30667	11.51	7.00227	4.24132	5.14462	5.6022	-	10	57542711	57546731	-	4021	protein_coding	hypothetical protein	-
SORBI_3010G232300	0	0	0	0	0	0	0	0	0	0.223948	0.947684	0.637742	0.242727	0	0.0434649	0	0	0.103525	0.209048	0.228301	-	10	57538197	57539340	-	1144	protein_coding	hypothetical protein	ubiquitin
SORBI_3010G232200	8.38961	18.1523	14.7221	22.7215	34.2725	22.8025	18.282	17.8147	24.9605	20.5054	19.3041	8.4153	9.46354	14.5161	13.7232	19.9022	16.9856	2.94513	9.50557	14.6931	-	10	57531766	57535282	-	2453	protein_coding	hypothetical protein	-
SORBI_3010G232100	307.53	382.107	499.973	451.633	203.127	314.959	262.666	380.642	147.619	182.067	200.636	453.83	225.222	553.167	643.42	337.312	844.861	126.386	256.543	225.102	-	10	57527650	57531059	+	3410	protein_coding	hypothetical protein	ubiquitin
SORBI_3010G232000	0.236433	0	0.0468021	8.01095	0	0.0434833	0	0	1.78887	3.35787	0.520315	0.364857	0.0590181	0.049465	0.132104	0.0449577	0	0	0.190609	0	-	10	57514057	57517882	-	1882	protein_coding	hypothetical protein	-
SORBI_3010G231900	3.01105	6.5901	86.2272	2.18683	0.671134	16.244	5.28803	4.98426	0.236256	5.55413	10.597	10.7129	6.13819	38.5671	9.12226	4.99392	21.512	10.0623	3.41643	16.5935	-	10	57512083	57513537	-	1330	protein_coding	hypothetical protein	Cu_bind_like
SORBI_3010G231800	3.38156	8.05321	17.1731	8.33731	7.48518	22.2174	13.8332	12.5259	25.4087	10.4734	10.3378	10.7966	9.6635	9.07511	6.04608	14.7226	13.8271	12.1661	11.03	10.1295	-	10	57509743	57511659	+	477	protein_coding	hypothetical protein	-
SORBI_3010G231700	30.1685	10.7771	6.75727	12.3027	13.1704	7.9853	8.98718	9.68509	6.52487	25.5736	15.6271	30.5555	27.2074	11.1511	6.82615	9.05319	12.1828	43.3563	39.1074	20.3879	-	10	57505579	57509406	-	743	protein_coding	hypothetical protein	-
SORBI_3010G231600	0.0430835	0	0.102341	9.26443	12.3173	0.190168	0	0	0.191238	7.42526	30.9633	3.9725	2.04335	0	0.0962893	0.049154	0	0	1.59773	3.69207	-	10	57446702	57450172	+	2582	protein_coding	Cytochrome P450 like protein [Source:Projected from Arabidopsis thaliana (AT1G11600) UniProtKB/TrEMBL;Acc:Q9SAB7]	p450
SORBI_3010G231500	12.6046	41.1635	27.5402	16.4968	7.05011	9.885	31.9515	31.6894	10.2805	7.28011	4.85056	2.07586	2.84952	38.0383	36.3693	27.1897	23.8494	0.189898	1.37406	1.6402	-	10	57437664	57443428	+	3742	protein_coding	hypothetical protein	ANF_receptor
SORBI_3010G231400	0	0	0	0	0	0	0.022591	0.0124678	0	0	0	0	0	0.252826	0.0142149	0	0.0910249	0	0	0	-	10	57431709	57435206	-	3498	protein_coding	hypothetical protein	-
SORBI_3010G231350	0	0	0	0	0	0	0	0	0	0	0	0	0	0	0	0	0	0	0	0	-	10	57430983	57431344	-	253	protein_coding	hypothetical protein	-
SORBI_3010G231300	0.357475	13.909	16.0454	1.03716	2.93479	10.6671	14.7445	7.67309	14.5692	2.31549	1.2292	1.97386	2.29774	11.6577	28.562	10.0176	6.73298	1.59369	1.9573	1.9802	-	10	57417517	57425072	+	4979	protein_coding	hypothetical protein	ANF_receptor
SORBI_3010G231200	0.341232	12.9451	22.1555	8.29456	0.878884	0.641519	0.942679	0.862137	0.152995	0.436599	0.286074	1.08242	0.113571	3.45847	0.271159	0.230703	0.806168	0	0.32604	0.31156	-	10	57415414	57417437	-	1467	protein_coding	hypothetical protein	-
SORBI_3010G231100	2.72724	28.4071	23.3919	12.4754	3.5399	5.10794	5.15233	14.3101	3.60489	7.6843	4.27309	0.830345	1.47193	15.0632	13.8905	4.65323	13.5386	3.57841	1.42616	1.19409	-	10	57403228	57408966	+	3773	protein_coding	hypothetical protein	ANF_receptor
SORBI_3010G231050	0	0	0	0	0.206407	0	0	0	0	0.133297	0	0	0	0	0	0	0	0	0	0	-	10	57390093	57392240	-	961	protein_coding	hypothetical protein	-
SORBI_3010G231000	0	0.659804	0.153452	0	0	0	5.96576	11.2196	0	3.96742	4.22433	1.09658	0.903025	71.8201	2.13679	0	137.754	0	0	0.644598	-	10	57371901	57373891	+	1722	protein_coding	hypothetical protein	-
SORBI_3010G230900	0	0.203877	0.0829784	0	0	0	1.39584	4.62212	0	4.52537	2.93223	0.525588	0.183115	15.8078	0.79633	0	27.3176	0	0.225295	0.799644	-	10	57360537	57363171	-	2123	protein_coding	hypothetical protein	p450
SORBI_3010G230800	0	0.854077	0.241816	0	0	0	5.88472	14.8168	0	5.68543	0.648085	0.235642	0.0381167	81.1769	2.96909	0	162.559	0	0	0	-	10	57346474	57348032	+	1457	protein_coding	hypothetical protein	-
SORBI_3010G230700	110.071	30.4832	13.1832	42.5977	31.9106	27.0709	33.5779	35.6355	19.8366	17.6777	28.9753	52.5512	35.418	35.2228	54.7819	30.2854	41.3901	70.2425	70.4347	43.1318	-	10	57336026	57340015	+	3942	protein_coding	hypothetical protein	-
SORBI_3010G230600	17.2739	9.87382	13.4425	9.62883	12.5135	8.34076	8.79912	8.47111	8.08028	20.5826	9.25636	8.22906	6.49995	9.9849	8.59686	9.87271	11.1491	3.91827	7.35913	8.17627	-	10	57307086	57313310	+	2811	protein_coding	Heat shock 70 kDa protein 16 [Source:Projected from Arabidopsis thaliana (AT1G11660) UniProtKB/Swiss-Prot;Acc:Q9SAB1]	HSP70
SORBI_3010G230500	3.45138	6.62088	6.07534	4.62234	1.86343	3.23701	3.40904	3.50407	3.51785	1.63619	2.21335	1.77182	2.40267	6.19086	8.76466	4.49721	7.71414	2.43014	2.80832	3.14767	-	10	57301267	57306043	-	4045	protein_coding	hypothetical protein	-
SORBI_3010G230400	1.09061	0	0.215886	2.4732	6.96843	0.802309	0.0968424	0.213786	0.110021	1.56983	5.05731	9.57202	6.26142	0.228169	0.243744	0	0.222973	7.83747	10.2577	1.76038	-	10	57300116	57300535	+	408	protein_coding	hypothetical protein	-
SORBI_3010G230300	23.551	0.939472	0.901993	22.675	4.25388	0.56476	0.492577	0.407773	0.159888	1.38782	5.16959	4.8534	10.8303	0.932589	0.265666	0.339044	0.384792	23.5706	13.2832	8.86673	-	10	57294510	57299067	+	2246	protein_coding	hypothetical protein	Galactosyl_T
SORBI_3010G230200	0	0	0	0	0	0	0	0	0	218.338	0.0367166	0	0	0	0	0	0	0	0	0	-	10	57289305	57291533	-	1905	protein_coding	hypothetical protein	Myb_DNA-binding
SORBI_3010G230100	0	0	0	0.599563	0.333935	0	0.399108	0	0	0.64696	0	0	0	0	0	0	0	0	0	0	-	10	57283280	57283756	-	198	protein_coding	hypothetical protein	-
SORBI_3010G230000	172.477	0.282058	1.75328	64.8141	33.2632	7.73753	0.0936296	0.28937	0.191468	3.48071	17.2543	12.3257	9.23846	0.0882399	1.81457	0.0601495	0.0215576	0.729681	2.77686	10.3666	-	10	57273792	57277651	-	2110	protein_coding	hypothetical protein	-
SORBI_3010G229801	0	0	0	0	0	0	0	0	0	13.5066	0	0	0	0	0	0	0	0	0	0.00586754	-	10	57235030	57272795	-	11128	protein_coding	hypothetical protein	Beach
SORBI_3010G229600	4.16338	1.86565	6.37091	4.09357	5.28286	1.75509	3.09049	2.93438	0.981586	2.54975	0.705923	0.938456	0.373666	1.87909	1.84007	0.853931	1.41547	0	0.754259	0.43932	-	10	57229968	57231256	-	1189	protein_coding	hypothetical protein	-
SORBI_3010G229500	0.387602	0	0.306904	0	0	0	0	0.0759795	0	0	0.0609279	0	0	0	0	0	0	0	0	0	-	10	57227226	57227799	-	574	protein_coding	hypothetical protein	-
SORBI_3010G229450	0	691.196	1541.66	0	0	9.53465	355.564	429.196	0.938112	1.02621	0.036544	0	0	951.504	42.034	1.72404	598.976	0	0	0	-	10	57224274	57225230	+	957	protein_coding	hypothetical protein	-
SORBI_3010G229400	15.9129	16.4735	13.1004	7.81636	5.49151	4.6771	9.49496	12.3607	5.80612	6.3364	6.2067	7.08578	8.96521	15.1058	9.2235	10.3501	13.272	7.5208	7.57336	8.2054	-	10	57212967	57218092	-	2992	protein_coding	Solanesyl diphosphate synthase 3, chloroplastic/mitochondrial [Source:Projected from Arabidopsis thaliana (AT2G34630) UniProtKB/Swiss-Prot;Acc:Q5HZ00]	-
SORBI_3010G229300	0.69817	0	0	0.0709584	2.19343	0.122289	0.472345	0.0521366	0.0268312	0	0	0	0	0	0	0.050574	0.326263	0	0.0357368	0.234169	-	10	57211052	57212863	+	1673	protein_coding	hypothetical protein	-
SORBI_3010G229200	0	0	0	0	0	0	0	0	0	0	0	0	0	0	0	0	0	0	0	0	-	10	57210389	57210613	+	189	protein_coding	hypothetical protein	-
SORBI_3010G229100	0	0	0	0	0	0	0	0	0	0	0	0	0	0	0	0	0	0	0	0	-	10	57209254	57209502	+	249	protein_coding	hypothetical protein	-
SORBI_3010G229075	0	0	0.205558	0	0	0	0	0	0	0	0	0	0	0.108627	0	0	0	0	0	0	-	10	57205402	57206820	+	857	protein_coding	hypothetical protein	-
SORBI_3010G229050	0	0	0.20156	0	0	0	0	0	0.15408	0	0	0	0	0	0.113784	0	0	0	0	0	-	10	57201099	57204585	+	874	protein_coding	hypothetical protein	-
SORBI_3010G229025	0	0	0	0	0	0	0.0575134	0	0	0	0	0	0	0	0	0	0	0	0	0	-	10	57187524	57190356	+	687	protein_coding	hypothetical protein	-
SORBI_3010G229000	10.364	4.49536	5.39864	82.0897	45.5747	102.61	57.3768	8.88398	72.1294	36.6114	32.7145	10.9155	7.90902	7.84929	57.3592	111.164	32.3444	2.05734	4.87942	9.10606	-	10	57181057	57189509	-	6102	protein_coding	hypothetical protein	Auxin_resp
SORBI_3010G228800	0.0336179	0	0	0.340821	0	0	0.0238814	0	0.0271313	0	0.0211379	0	0	0	0.0300537	0.0383546	0.0412389	0	0	0	-	10	57173128	57177227	+	3309	protein_coding	hypothetical protein	Pkinase
SORBI_3010G228700	9.20429	12.9777	8.68669	9.62407	11.729	8.95985	7.97499	9.53164	9.21034	8.19014	10.1279	13.2712	14.1799	13.7908	15.1062	12.0746	11.3288	17.5199	10.9432	13.8064	-	10	57165982	57172412	+	2393	protein_coding	30-kDa cleavage and polyadenylation specificity factor 30 [Source:Projected from Arabidopsis thaliana (AT1G30460) UniProtKB/Swiss-Prot;Acc:A9LNK9]	YTH
SORBI_3010G228600	5.04658	5.17286	3.86699	5.21181	5.93459	8.58275	8.32637	4.42505	9.67843	9.24806	6.68744	10.3837	7.96468	5.99428	8.78049	9.57541	6.87844	18.3715	12.1908	7.96268	-	10	57162804	57163828	-	1025	protein_coding	hypothetical protein	LSM
SORBI_3010G228500	8.68647	7.17211	4.67593	6.06391	8.38223	7.49528	7.45722	8.3792	5.50025	6.41149	6.97833	8.19251	8.81892	8.3755	8.46379	10.5502	8.44448	12.8302	8.58063	6.76115	-	10	57154105	57162096	+	6480	protein_coding	hypothetical protein	-
SORBI_3010G228400	6.90061	9.47354	6.66521	9.68822	4.81422	14.8154	11.8205	11.6082	22.1975	8.62253	8.5239	10.6111	6.89008	9.58371	14.7006	43.1427	8.82513	7.86773	8.41708	7.8709	-	10	57149491	57154027	+	2273	protein_coding	hypothetical protein	-
SORBI_3010G228300	0	0	0	0	0	0	0	0	0	0.925731	0	0	0	0	0	0.573241	0	0	0.162026	0	-	10	57140176	57141795	+	369	protein_coding	hypothetical protein	-
SORBI_3010G228200	0	0	0	0	0	0	0	0	0	1.95357	0	0	0	0	0	0.276504	0	0	0	0	-	10	57139058	57139516	-	459	protein_coding	hypothetical protein	-
SORBI_3010G228100	9.17432	0	0	41.5097	9.86586	17.7831	0	0	0.161397	4.01086	7.40319	1.02228	1.4976	0	3.91086	0	0	0.585511	2.5796	6.25062	-	10	57117625	57119973	-	2225	protein_coding	hypothetical protein	-
SORBI_3010G228000	22.4443	14.2222	18.3776	6.46993	2.45694	19.586	8.76588	9.85567	6.62272	2.09207	9.43384	3.78013	5.6866	17.6808	56.3345	17.4205	29.4479	3.16212	1.84316	4.49312	-	10	57104706	57109021	-	3633	protein_coding	hypothetical protein	Pkinase
SORBI_3010G227950	0.144983	0.0897459	0.396576	0.0703278	2.14652	0.0193923	0.0561778	0.0930119	0.276565	0.24284	0.0580114	0.0101697	0.0526408	0.17648	0.0824802	0.250623	0.506603	0	0.0141677	0.634373	-	10	57093557	57097896	+	4220	protein_coding	hypothetical protein	-
SORBI_3010G227900	0.203833	0.123921	3.3893	0.326285	0.348314	0.0374877	0	0.119869	0	0.273839	0.0480613	0.176934	0.381604	0.106611	0	0.0193794	0	0.813785	0.273878	0.299102	-	10	57077749	57081087	+	2183	protein_coding	hypothetical protein	-
SORBI_3010G227800	4.043	2.18851	19.3415	115.717	5.49987	1.0329	1.5622	2.61302	13.0379	9.58398	2.40383	1.77513	2.55047	1.86866	1.31568	18.6822	1.64626	2.23322	3.4367	3.13761	-	10	57071825	57077620	-	3288	protein_coding	Integral membrane protein, Metal ion transpor [Source: Projected from Oryza sativa (Os06g0676000)]	-
SORBI_3010G227600	0.267622	0.47726	1.20079	0.761594	0.132556	0.196878	0.0316854	0.209842	0.0719947	0.239692	1.51445	0.516235	0.356286	0.11198	0.0797495	0.441032	0.0729534	0	0.191781	0.261804	-	10	57054760	57056006	+	1247	protein_coding	hypothetical protein	-
SORBI_3010G227400	60.3277	13.3063	27.9186	48.4361	0.112405	33.2351	9.10545	16.4596	34.578	16.5022	133.747	218.019	477.039	14.0853	19.5364	35.0172	15.4142	1312.43	350.052	383.969	-	10	57047917	57050871	-	2647	protein_coding	hypothetical protein	Glyco_hydro_31
SORBI_3010G227300	1.00089	0	0	0	0.0212465	5.49603	0	0	0	4.41812	0.719231	0.110325	0.0356915	0	44.6108	0.108754	0	0	0.0768478	0.293739	-	10	57032262	57036574	+	1556	protein_coding	hypothetical protein	NAM
SORBI_3010G227200	5.8275	0	0	0.246293	7.09889	0.679133	0.0409872	0	0	2.10396	7.4734	1.11297	1.49786	0.0724272	0.283694	0	0.165148	0	0.620203	1.21918	-	10	56988383	56990310	-	1928	protein_coding	hypothetical protein	-
SORBI_3010G227150	0	0	0	0	0	0	0	0	0	0	0	0	0	0	0	0	0	0	0	0	-	10	56984182	56984748	+	433	protein_coding	hypothetical protein	-
SORBI_3010G227100	1.06469	5.01756	17.9651	4.1726	5.11714	5.71228	7.35465	8.75124	10.5925	6.18647	6.37125	4.81569	5.27867	4.90044	6.51497	11.9097	8.69197	4.45589	2.50595	4.09434	-	10	56956881	56961208	+	3030	protein_coding	hypothetical protein	BTB
SORBI_3010G227000	0.995026	0.880888	0.247868	0.691998	4.86424	1.44754	1.08806	0.569808	2.00307	2.79799	3.51483	2.47577	1.69678	0.421024	0.899526	1.36057	0.393149	2.04728	1.62238	1.58806	-	10	56950833	56955807	+	4975	protein_coding	hypothetical protein	PPR
SORBI_3010G226901	5.49234	1.86565	0	10.6061	5.07811	4.55355	3.59197	2.9052	1.54789	1.7401	3.48082	4.40598	2.78551	3.21011	9.04069	7.59239	5.41845	1.94913	2.76447	2.86557	-	10	56943880	56945581	+	1276	protein_coding	hypothetical protein	-
SORBI_3010G226800	0	0	0	0	0	0	0	0	0	0	0	0	0	0	0	0	0.259182	0	0	0	-	10	56939774	56940124	-	351	protein_coding	hypothetical protein	-
SORBI_3010G226700	0	0	0	0	0	0	0.554161	0	0.125915	0.119774	0.1962	0	0	0.391696	1.67373	0.29667	2.99841	0	0	0	-	10	56933015	56933727	-	713	protein_coding	hypothetical protein	-
SORBI_3010G226600	0	0	0	0	0.370415	0	0	0	0	0	0	0	0	0	0	0	0	0	0	0	-	10	56929551	56929943	-	357	protein_coding	hypothetical protein	-
SORBI_3010G226500	0	0.047922	0	0	0	0	0	0	0	0.0378205	0	0	0	0	0.0440423	0	0	0	0	0	-	10	56921537	56922665	-	1129	protein_coding	hypothetical protein	-
SORBI_3010G226400	0.0969004	0.377031	0.230178	0	0	0	0	0	0	0	0	0	0.0967527	0	0	0	0.0396224	1.13481	0	0.511887	-	10	56913843	56914990	-	1148	protein_coding	hypothetical protein	-
SORBI_3010G226300	0	0	0	0	0	0	0	0	0	0	0	0	0	0	0	0	0	0	0	0	-	10	56908806	56909846	-	1041	protein_coding	hypothetical protein	Str_synth
SORBI_3010G226201	0.319049	0.310348	0	0	0	0	0.453289	0	0.0858292	0.408216	0.534954	0.984695	2.12375	0	0	0.242668	0	3.39674	1.14317	0.374535	-	10	56905388	56906081	-	523	protein_coding	hypothetical protein	-
SORBI_3010G226100	0	0	0.197788	0	0	0.0918812	0.0591492	0.0652878	0.0335993	0.0319606	0.0261771	0.032123	0.0831378	0.139361	0.111655	0	0	0	0	0	-	10	56902186	56903521	-	1336	protein_coding	hypothetical protein	-
SORBI_3010G226000	8.54779	12.38	24.7031	7.54348	9.00602	10.1852	10.9103	11.7594	11.59	11.3284	7.92669	8.0551	9.83987	16.3071	9.88633	11.7471	15.6544	14.9048	7.32093	8.64126	-	10	56893511	56901602	+	3234	protein_coding	hypothetical protein	-
SORBI_3010G225950	0	0	0	0	0	0	0	0	0	0	0.0956189	0.410682	1.17677	0	0	0	0	0.647616	0.694729	0.624823	-	10	56879720	56887316	+	1463	protein_coding	hypothetical protein	-
SORBI_3010G225900	1.05558	0.473903	10.5441	0.346608	0	0.29867	0.230725	0.382005	0.655309	0.12467	0.153165	0.0626515	0.243224	0.951316	1.08884	0.123519	1.99211	0	0.0872812	0	-	10	56873572	56874256	-	685	protein_coding	hypothetical protein	-
SORBI_3010G225801	0	0	0	0	0	0	0	0	0	0	0	0	0	0	0	0	0	0	0	0	-	10	56871714	56873102	-	558	protein_coding	hypothetical protein	-
SORBI_3010G225701	3.78461	4.2871	15.201	0.138079	0	0.398588	7.06592	12.5168	0.411164	0.633227	0.147456	0.0748758	0.07267	14.3335	5.92088	0.658135	13.3391	0.0172191	0.0782333	0.0759453	-	10	56864120	56873267	-	6878	protein_coding	hypothetical protein	-
SORBI_3010G225600	0.018893	0.496198	2.06441	0	0	0	1.39579	4.08865	0.0457425	0.0145039	0	0	0	3.46253	0.0168899	0	1.97767	0	0	0	-	10	56857609	56862185	-	2944	protein_coding	hypothetical protein	-
SORBI_3010G225500	5.51198	5.52413	3.17411	0.534745	0.198556	0.245752	2.96634	5.36968	0.404402	0	1.47032	0	0	34.1062	14.6334	0.635213	26.363	0	0	0	-	10	56854477	56854809	-	333	protein_coding	hypothetical protein	-
SORBI_3010G225400	3.32585	0.924327	0.551764	0	0.0188266	0.0699051	4.7702	6.50707	0.178941	0.607907	3.12682	0.0244398	0.0316264	6.60028	3.05818	1.15641	10.5686	0	0	0	-	10	56847812	56849567	-	1756	protein_coding	hypothetical protein	-
SORBI_3010G225300	15.637	21.6019	50.8163	35.6031	19.2545	18.1732	30.3212	35.5048	16.7716	44.3807	22.9948	33.2876	44.856	56.5634	39.0232	26.3051	64.7307	55.4205	64.1676	39.5232	-	10	56833243	56836208	-	1092	protein_coding	hypothetical protein	ubiquitin
SORBI_3010G225276	0	0	0	0	0	0	0	0	0	0	0	0	0	0	0	0	0	0	0	0	-	10	56827066	56827724	-	513	protein_coding	hypothetical protein	-
SORBI_3010G225251	0	0	0	0	0	0	0	0	0	0	0	0	0	0	0	0	0	0	0	0	-	10	56824161	56824787	-	488	protein_coding	hypothetical protein	-
SORBI_3010G225226	0.104466	1.23392	1.37074	0.844085	2.84736	1.38332	3.06383	2.45736	4.38408	2.74962	0.882056	0.863623	1.25168	2.46033	0.453611	2.19074	1.81848	0.826202	1.39563	1.80448	-	10	56815198	56819662	+	3727	protein_coding	hypothetical protein	-
SORBI_3010G225201	22.99	12.504	13.3101	18.4665	13.4442	29.7336	18.9656	20.1585	20.15	43.838	17.1754	24.7007	18.0184	15.2052	13.4807	27.4514	17.6892	26.8448	21.1249	21.1843	-	10	56811327	56811776	-	450	protein_coding	hypothetical protein	-
SORBI_3010G225175	0	0	0	0	0	0	0	0	0	0	0	0	0.0800231	0	0	0	0	0	0	0.0940836	-	10	56806956	56808773	+	694	protein_coding	hypothetical protein	-
SORBI_3010G225150	0	0	0	0	0	0	0	0	0	0	0	0	0	0	0	0	0	0	0	0	-	10	56804903	56805639	-	599	protein_coding	hypothetical protein	-
SORBI_3010G225125	0	0	0	0	0	0	0	0	0	0	0	0	0	0	0	0	0	0	0	0	-	10	56792719	56793317	-	297	protein_coding	hypothetical protein	-
SORBI_3010G225100	4.74136	0.0539421	0.373227	11.244	3.66687	6.2315	4.15602	0.315243	5.62787	2.42658	3.65242	3.12352	3.41909	0.406064	6.01098	13.3706	5.10192	0.236157	5.24557	5.51712	-	10	56749603	56753614	+	4012	protein_coding	hypothetical protein	-
SORBI_3010G225001	0.551482	0.536441	0	0.756672	0	0.289786	0.223862	0.123547	0.445072	1.27009	0.544899	1.76285	1.80925	0.527439	0.281721	0.119845	0.515427	11.0716	3.72614	1.66472	-	10	56696807	56697512	+	706	protein_coding	hypothetical protein	-
SORBI_3010G224900	253.951	80.2666	71.6889	224.712	186.63	226.328	127.104	101.608	195.763	135.999	201.232	298.798	186.484	152.226	377.463	245.621	192.268	202.391	208.718	148.244	-	10	56690924	56694454	-	1886	protein_coding	hypothetical protein	Tubulin
SORBI_3010G224800	90.4244	0.114566	0.0466287	0.911246	37.7148	0.303255	0.0209167	0	0.237632	2.21521	11.997	6.99747	1.79338	0	1.42143	0.111978	0.144478	0.31348	1.10776	0.8987	-	10	56687722	56689902	+	1889	protein_coding	Patellin-4 [Source:Projected from Arabidopsis thaliana (AT1G30690) UniProtKB/Swiss-Prot;Acc:Q94C59]	-
SORBI_3010G224700	11.7133	56.7358	2.49492	3.54532	24.3977	28.0428	17.4688	21.645	40.7702	10.1753	12.7056	14.2966	12.5332	16.0935	8.31281	16.6199	14.9428	10.8661	8.94605	10.0112	-	10	56679793	56687091	+	3248	protein_coding	hypothetical protein	-
SORBI_3010G224600	1.29351	0.150988	0.0819363	0	0	1.0277	0.257285	1.54164	0.0835138	0.397203	0.162663	0	0	1.64537	0.416292	0	3.63892	0	0	0	-	10	56656330	56657404	+	1075	protein_coding	hypothetical protein	Auxin_inducible
SORBI_3010G224501	48.4107	0.770711	1.50567	10.2733	4.35614	4.45899	2.81422	0.838697	4.66791	2.49384	21.4718	6.29684	13.9631	1.95602	2.0187	2.77213	1.03673	2.86803	4.89713	22.7878	-	10	56635200	56636603	-	1404	protein_coding	hypothetical protein	Auxin_inducible
SORBI_3010G224400	0	0	0	0.16135	0.0449331	0	0.953221	0	0.152527	1.45088	1.02197	15.4283	9.62398	0	0	0	0.154558	14.8896	5.8914	0.554655	-	10	56622387	56631581	+	2943	protein_coding	hypothetical protein	K_trans
SORBI_3010G224300	7.98298	11.6858	18.3658	6.57669	12.6118	11.0185	13.6693	12.9675	19.7896	8.42409	9.00884	19.6424	18.5639	13.8399	13.1341	15.7037	14.1414	27.352	22.6125	27.5645	-	10	56603672	56609258	+	2139	protein_coding	hypothetical protein	Pro_isomerase
SORBI_3010G224200	3.81536	3.45036	2.17136	0.76343	0.0177168	2.3463	3.98081	4.32383	1.82826	1.62468	1.34943	0.482981	0.833338	7.03436	5.48934	1.02022	7.38607	0	4.48567	7.59314	-	10	56596202	56600159	+	1866	protein_coding	hypothetical protein	Myb_DNA-binding
SORBI_3010G224100	6.3306	3.03864	5.55982	1.03255	8.31418	1.72863	1.59068	1.47397	1.96332	3.52291	4.18906	6.46304	5.35487	1.17986	2.02652	0.88311	1.46949	8.77062	4.7842	3.18032	-	10	56582807	56585572	-	2012	protein_coding	hypothetical protein	-
SORBI_3010G224000	7.21277	18.535	31.1695	6.72071	5.42817	13.8064	19.9088	24.3525	14.1472	17.6996	10.5143	7.64187	7.64964	25.6156	13.1848	20.7841	21.2466	6.57111	6.80807	7.22447	-	10	56572251	56582791	+	3100	protein_coding	molybdenum cofactor sulfurase (LOS5) (ABA3) [Source:Projected from Arabidopsis thaliana (AT1G16540) TAIR;Acc:AT1G16540]	MOSC
SORBI_3010G223900	6.85772	12.4248	6.21752	9.10602	10.9369	21.3735	12.3648	9.15344	13.8151	17.3811	9.92399	8.09856	7.84038	9.06836	13.3611	10.9496	9.31135	11.2024	12.9704	8.29618	-	10	56567398	56571947	+	2125	protein_coding	hypothetical protein	OTU
SORBI_3010G223800	0	0	0.0964396	0	0	0	0.0144203	0.0159169	0	0	0.0127637	0.313258	0.243224	0	0	0	0	0.129671	0.240023	0.0476599	-	10	56553838	56558914	+	2740	protein_coding	hypothetical protein	Peptidase_C48
SORBI_3010G223700	6.14218	11.8166	36.6916	10.5968	9.18772	12.1749	13.6231	11.2375	11.5939	9.14238	11.2213	12.48	10.3576	13.3357	13.7579	13.4702	12.8925	16.8567	16.8726	17.0646	-	10	56547441	56551984	-	1630	protein_coding	hypothetical protein	Myb_DNA-binding
SORBI_3010G223600	25.7478	33.0517	87.766	47.5534	13.5981	30.0836	15.799	19.8607	16.598	16.4617	23.9207	29.108	26.007	37.8409	43.0251	22.7214	37.5984	28.9823	46.1635	41.689	-	10	56543118	56545908	+	2791	protein_coding	hypothetical protein	ubiquitin
SORBI_3010G223500	0.475973	0.185197	0.969112	1.71249	2.05309	0.310135	0.463707	0.37321	1.09752	0.835195	0.401886	1.69986	2.72928	0.341417	0.717287	0.713706	0.622798	3.18524	1.53489	2.65007	-	10	56538257	56542346	-	4090	protein_coding	hypothetical protein	DnaJ
SORBI_3010G223400	33.4081	10.7169	26.6876	30.7127	18.4343	15.5261	19.9245	22.1939	6.11393	23.9766	14.3398	13.9798	13.5878	19.0026	15.8083	9.85416	18.9904	16.1308	10.3757	11.5402	-	10	56532298	56537491	-	2812	protein_coding	Conserved oligomeric Golgi complex component-related / COG complex component-like protein [Source:Projected from Arabidopsis thaliana (AT5G51430) UniProtKB/TrEMBL;Acc:Q9FGN0]	-
SORBI_3010G223300	32.7081	12.8977	25.2689	27.2695	13.585	18.3597	19.9071	27.138	14.4817	18.9412	17.3881	12.1147	14.0895	26.7542	31.5755	23.3661	32.5301	12.9375	10.987	9.83243	-	10	56524446	56528192	-	1959	protein_coding	hypothetical protein	CDP-OH_P_transf
SORBI_3010G223200	9.19889	761.86	952.925	16.1529	12.6855	29.4683	95.0733	154.598	39.3814	27.5425	17.5809	15.8447	11.7143	280.207	63.8356	61.7417	113.943	2.59588	11.1644	12.0626	-	10	56519098	56523596	-	3513	protein_coding	hypothetical protein	AAA
SORBI_3010G223100	12.2815	5.43337	18.2708	16.3073	10.5426	8.80905	6.67756	6.16683	10.455	11.2958	7.64051	6.74269	7.18077	5.38596	6.65095	7.94008	6.16144	5.05414	4.12547	7.18095	-	10	56509548	56518664	-	4710	protein_coding	Nucleotidyltransferase family protein [Source:Projected from Arabidopsis thaliana (AT4G00060) UniProtKB/TrEMBL;Acc:F4JH01]	NTP_transf_2
SORBI_3010G222900	0.498326	0.0466092	0.045528	0.35794	3.18406	1.20554	0.156576	0.0300567	1.56229	1.37574	1.13281	2.5732	2.52611	0.00801973	0.702507	1.67646	0.0783709	1.83648	1.35975	2.55371	-	10	56499804	56506625	-	5804	protein_coding	Protein PRD1 [Source:Projected from Arabidopsis thaliana (AT4G14180) UniProtKB/Swiss-Prot;Acc:O23277]	-
SORBI_3010G222800	2.45035	1.49761	2.95322	2.05955	16.0851	0.638094	0.292679	0.561093	0.787521	8.83952	10.6758	7.83034	9.05032	0.199615	0.116313	0.247399	0.0886676	15.237	9.34691	5.88028	-	10	56494125	56498766	-	2565	protein_coding	hypothetical protein	-
SORBI_3010G222732	0	0	0	0	0.104322	0	0	0	0	0.0134741	0.0220717	0.0135425	0	0	0	0	0	0	0.0188664	0.020604	-	10	56483960	56487342	-	3169	protein_coding	hypothetical protein	-
SORBI_3010G222666	0	0	0	0	0	0	0	0	0	0	0	0	0	0	0	0	0	0	0	0	-	10	56482195	56483434	-	1119	protein_coding	hypothetical protein	-
SORBI_3010G222600	0	0	0	0.122469	0.159159	0	0	0	0	0	0	0	0	0	0	0	0	0	0	0	-	10	56474460	56475995	-	1454	protein_coding	hypothetical protein	BTB
SORBI_3010G222501	0	0	0	0.709796	0.247082	0	0	0	0.402589	0.0638256	0.104552	0	0	0	0	0.126473	0.0679917	0	0.0893686	0	-	10	56471184	56472365	-	669	protein_coding	hypothetical protein	BTB
SORBI_3010G222400	11.9208	0.940938	0.540654	14.361	44.0005	4.87665	4.16338	1.58387	9.39103	2.8175	1.69944	1.88788	1.33514	1.83329	9.76672	4.73904	3.14101	0.0605795	3.63924	3.47344	-	10	56466475	56468578	-	1955	protein_coding	hypothetical protein	BTB
SORBI_3010G222300	0.379018	0	0	0.202237	0.225278	0	0.100967	0	0.0764713	0	0	0.0731112	0	0.0396478	0.0423542	0.0360351	0.0387449	0	0	0	-	10	56464481	56465654	-	1174	protein_coding	hypothetical protein	BTB
SORBI_3010G222200	0	0	0	0	0	0	0	0	0	0.0501166	0	0	0	0	0	0	0	0	0	0	-	10	56458540	56459494	-	852	protein_coding	hypothetical protein	BTB
SORBI_3010G222100	2.53233	0.175948	0.525147	4.72923	17.9543	3.68149	1.30635	1.56011	1.55711	2.38376	3.67734	0.930435	0.571916	1.53894	4.66245	4.92987	2.02162	0	1.55545	0.778573	-	10	56449305	56451149	-	1845	protein_coding	hypothetical protein	BTB
SORBI_3010G222050	0	0	0	0	0	0	0	0	0	0.138186	0	0.138888	0	0.150636	0	0	0	0	0	0	-	10	56447290	56457753	+	309	protein_coding	hypothetical protein	-
SORBI_3010G222000	0	0	0	0	0	0	0	0	0	0	0	0	0	0	0	0	0	0	0	0	-	10	56444548	56445812	-	1265	protein_coding	hypothetical protein	BTB
SORBI_3010G221900	0	0	0	0	0	0	0	0	0	0	0	0	0	0	0	0	0	0	0	0	-	10	56438878	56439819	-	942	protein_coding	hypothetical protein	BTB
SORBI_3010G221800	31.7947	2.01533	5.67861	40.7617	60.9091	13.737	8.0948	3.89469	9.06777	21.6352	21.9623	119.383	40.9757	6.22399	13.5351	11.3743	6.75563	30.8242	57.8746	127.688	-	10	56433551	56437233	-	2094	protein_coding	hypothetical protein	-
SORBI_3010G221700	0	0	0	0	0	0	0	0.119814	0	0	0	0	0	0	0	0	0	0	0	0	-	10	56429222	56429585	+	364	protein_coding	hypothetical protein	-
SORBI_3010G221600	11.0003	32.4198	9.80607	4.3536	4.9362	10.5309	17.2589	16.1368	12.1996	9.00405	6.84794	23.0461	17.3118	14.0828	7.88026	10.2231	10.6641	38.1591	22.7091	14.1534	-	10	56425400	56428107	+	1527	protein_coding	HISTIDINE TRIAD NUCLEOTIDE-BINDING 2 [Source:Projected from Arabidopsis thaliana (AT1G31160) UniProtKB/TrEMBL;Acc:Q8GYJ9]	HIT
SORBI_3010G221500	0.0251451	0	0.11946	0	0.298911	0.0739924	0.0178624	0	0	0.038607	2.26089	0.795465	0.426814	0.0841709	0	0	0.082254	0	0.86492	1.06265	-	10	56416017	56418738	+	2212	protein_coding	hypothetical protein	SRF-TF
SORBI_3010G221400	2.9165	2.06783	3.01748	1.18962	1.56399	0.677036	2.36647	3.15073	1.04611	1.03489	3.92026	5.17076	3.80508	2.49492	0.95021	0.561966	2.18369	6.40327	4.50044	1.67381	-	10	56411273	56415563	+	4291	protein_coding	hypothetical protein	-
SORBI_3010G221300	80.9646	0.188188	0.919112	6.81312	20.9856	47.3935	3.50452	0.606779	5.62084	3.56447	9.00164	9.40427	0.676091	0.404752	22.4838	4.34088	0.791069	0.41194	4.47107	2.83887	-	10	56388828	56389402	+	575	protein_coding	hypothetical protein	-
SORBI_3010G221200	0	0	0	0	0	0	0.0433242	0	0	0	0.0383472	0	0	0	0	0	0	0	0	0	-	10	56379636	56381764	-	1824	protein_coding	hypothetical protein	-
SORBI_3010G221100	0.258501	0.209543	0.0682274	1.4253	0.0768231	1.90168	0.520293	0.0675635	6.78024	1.25684	0	0.0332427	0.0860357	0	0.731799	1.278	1.05701	0	0.138933	0.101153	-	10	56374421	56375711	+	1291	protein_coding	hypothetical protein	-
SORBI_3010G221032	12.4126	118.83	58.4722	173.375	11.5802	104.519	69.5919	41.9183	44.3181	5.42788	26.3529	6.36471	9.13835	57.723	210.589	157.419	79.8583	0.501834	7.5579	8.25397	-	10	56362136	56363551	+	1416	protein_coding	hypothetical protein	-
SORBI_3010G220966	0.177136	0.0861528	0	1.03969	0.0526426	0.130311	0.0629167	0	0	0	0	0	0	0	0.39589	0.471554	0	0	0	0	-	10	56361292	56361919	-	628	protein_coding	hypothetical protein	-
SORBI_3010G220900	10.7187	9.62585	5.81701	9.96061	11.334	6.60059	7.4432	6.97229	9.07169	7.25781	9.85695	18.2135	18.7592	9.05398	6.20875	8.87019	8.47023	26.0715	24.4027	13.8081	-	10	56337043	56342041	-	2771	protein_coding	hypothetical protein	-
SORBI_3010G220800	0.394474	0	0.104115	0.175404	25.4981	0	0	0	0	4.01253	8.5778	0.862384	0.886213	0	0.0587752	0	0	0.209987	0.77738	1.08052	-	10	56310472	56315161	-	1692	protein_coding	hypothetical protein	-
SORBI_3010G220700	0	4.31791	2.87959	0.285369	0	0.039344	0.132972	1.13224	0.0431622	0.123171	0	0	0	0.648966	0.143434	0.0813561	0.262422	0	0	0	-	10	56289963	56292569	+	2080	protein_coding	hypothetical protein	-
SORBI_3010G220600	31.6765	1.53658	11.1912	49.1711	4.54631	3.41287	2.84673	4.58939	29.8587	9.7015	9.55604	13.0224	7.77006	3.56231	18.9382	26.0913	17.0795	7.29362	4.95102	9.31098	-	10	56275646	56282221	-	3345	protein_coding	Similar to heavy metal ATPase [Source: Projected from Oryza sativa (Os06g0665800)]	E1-E2_ATPase
SORBI_3010G220500	23.9554	25.5242	176.063	63.8601	44.4503	28.5701	32.5245	37.4423	27.6041	45.9146	68.8479	189.61	131.823	13.0373	17.643	43.1016	24.858	139.579	128.375	127.124	-	10	56265555	56270403	-	1753	protein_coding	Allantoate deiminase [Source:Projected from Arabidopsis thaliana (AT4G20070) UniProtKB/Swiss-Prot;Acc:O49434]	Peptidase_M20
SORBI_3010G220400	0.588235	0	0	0	0.407903	0	0	0	0.448359	0.200702	0.10274	0.0504304	0	0	0	0.372842	0	0.139169	0	0	-	10	56254112	56255950	-	1702	protein_coding	hypothetical protein	-
SORBI_3010G220300	0.34452	0	0	0.490214	0.0455052	0	0	0	0	0	0	0	0	0	0	0	0	0	0	0.0449374	-	10	56235843	56237762	-	1453	protein_coding	hypothetical protein	-
SORBI_3010G220200	55.96	6.8363	9.19008	21.2534	12.4421	12.2947	8.21822	9.49955	9.12371	8.36051	10.2951	43.6287	9.19957	6.62247	11.6898	11.5795	5.57795	6.21853	14.6836	10.9266	-	10	56231903	56235097	-	2952	protein_coding	hypothetical protein	-
SORBI_3010G220100	34.7541	13.855	20.9772	70.6555	23.6765	29.9679	21.164	22.4669	31.3818	26.0971	22.5389	19.2327	16.1891	19.4093	24.5542	27.7159	19.6856	24.5661	24.3182	21.0958	-	10	56227872	56232285	+	2343	protein_coding	hypothetical protein	-
SORBI_3010G220000	2.60868	2.17503	12.7868	12.3618	0.775266	0.982392	3.02239	3.263	4.61168	0.88212	0.273376	0.263584	0.341092	1.79325	2.35987	7.48785	3.17466	0	0.801174	0.765591	-	10	56220697	56223569	+	1791	protein_coding	hypothetical protein	Myb_DNA-binding
SORBI_3010G219900	0.194933	2.49662	1.59493	1.10947	1.1007	1.36233	2.19253	2.59839	2.07138	0.872942	0.714977	0.451223	0.616346	1.65849	1.36508	0.963728	1.22218	0.691781	1.39691	0.724641	-	10	56202530	56205395	-	1712	protein_coding	hypothetical protein	-
SORBI_3010G219800	12.1482	8.08624	22.5368	90.292	1.40014	6.63106	12.8755	14.3644	61.7003	9.08688	1.7015	0.570815	0.602596	11.4045	31.693	40.8096	60.2294	0.165814	1.29746	1.59978	-	10	56197329	56202320	+	2857	protein_coding	hypothetical protein	-
SORBI_3010G219700	1.31266	15.9232	22.1325	11.7834	3.5645	3.46504	11.5189	27.7496	7.99729	5.74989	2.96159	5.20318	1.82465	11.6959	8.76667	7.69363	8.58791	2.13738	2.79433	1.87331	-	10	56187502	56190622	-	2161	protein_coding	hypothetical protein	-
SORBI_3010G219600	5.65051	3.98594	23.3609	14.7529	13.9596	6.28284	4.28975	9.60518	21.7742	2.91395	0.5153	0.682268	1.22743	11.2982	5.43703	9.97346	16.0323	0.137766	2.85144	4.68375	-	10	56183058	56187947	+	2579	protein_coding	hypothetical protein	Pkinase_Tyr
SORBI_3010G219500	0.148984	104.198	12.8977	0.211988	0.915041	7.41635	19.65	30.2949	11.5027	7.66301	1.84231	2.14581	0.446272	13.5068	0.71034	0.944312	2.96474	0	0.320291	0.874473	-	10	56174464	56175971	-	1120	protein_coding	Peptidyl-prolyl cis-trans isomerase FKBP13, chloroplastic [Source:Projected from Arabidopsis thaliana (AT5G45680) UniProtKB/Swiss-Prot;Acc:Q9SCY2]	FKBP_C
SORBI_3010G219400	2.01626	5.07224	5.6519	2.02802	3.51258	3.6144	3.52313	5.4697	3.79683	2.98895	4.24043	2.7538	3.79496	4.55768	2.44475	3.03187	3.98007	4.49058	4.95739	2.8022	-	10	56169332	56173729	-	2400	protein_coding	hypothetical protein	-
SORBI_3010G219300	0.603263	0	0.191066	0.128756	0	0	0	0	0.0973724	0.185247	3.48967	145.785	196.364	0	0	0	0	31.3423	224.106	83.7066	-	10	56166553	56167156	-	461	protein_coding	hypothetical protein	-
SORBI_3010G219200	5.25717	4.19331	4.66216	2.1319	0.499955	0.386746	0.59753	0.906871	0.763701	0.645737	2.90887	1.54142	1.15481	1.49582	1.40994	1.19958	1.2038	0	1.01718	0.740575	-	10	56158845	56159373	+	529	protein_coding	hypothetical protein	-
SORBI_3010G219100	29.1389	14.1299	26.0677	22.7133	12.7535	13.4481	10.7498	13.926	13.1683	9.02318	16.7963	24.4217	17.993	18.3914	12.5988	12.8058	17.1932	16.1723	17.6321	17.2897	-	10	56157386	56162416	-	1926	protein_coding	Probable serine/threonine-protein kinase PBL17 [Source:Projected from Arabidopsis thaliana (AT2G07180) UniProtKB/Swiss-Prot;Acc:Q8H1E3]	Pkinase
SORBI_3010G219000	7.02172	6.5882	3.63358	3.95318	6.91753	4.53512	4.96842	4.79041	4.35054	4.62647	6.41396	5.71649	6.21054	4.1642	3.95418	4.33144	4.02415	9.24153	7.33973	4.9003	-	10	56150924	56154794	-	2012	protein_coding	hypothetical protein	-
SORBI_3010G218900	0	0	0.0961589	0.0647999	0	0	0.0862701	0.190446	0	0	0.305438	0.234259	0.0606289	0.20326	0	0	0.148973	0	0.195811	0	-	10	56148744	56149659	+	916	protein_coding	hypothetical protein	Skp1
SORBI_3010G218800	0.862339	0	0.341401	1.19634	0	0.222034	0	0	0	0.0993008	0.48799	0.798443	0.430512	0	0.192728	0	0	0	0.046347	0.404924	-	10	56141769	56146351	+	1290	protein_coding	hypothetical protein	Lipase_GDSL
SORBI_3010G218700	0.418202	0.976312	7.81475	0.847953	0.198854	0.58454	1.90131	3.37749	0.202505	0.192629	0.131476	0.225875	0.0835128	1.22491	0.112159	0.127234	1.02601	0	0	0.245466	-	10	56134743	56136072	-	1330	protein_coding	hypothetical protein	-
SORBI_3010G218600	5.65902	40.8761	60.3614	0.775805	0.313481	0.943772	38.1953	55.1356	1.67959	3.34854	0.627392	1.12185	0.426981	17.8695	0.20389	0.119261	11.0044	0	0.33709	0.686072	-	10	56126622	56133704	-	3902	protein_coding	hypothetical protein	Pkinase
SORBI_3010G218500	20.7529	29.3857	511.582	37.274	3.70761	10.4133	15.4667	5.4868	11.3109	7.16772	4.04787	3.36296	16.7886	51.1644	8.29326	13.093	20.8302	74.4995	27.1215	64.7072	-	10	56122217	56126053	-	2782	protein_coding	hypothetical protein	bZIP_1
SORBI_3010G218400	42.7667	31.8149	35.8843	21.9589	21.8635	33.62	37.4725	31.8502	33.8485	57.5793	20.5731	44.0532	47.4827	22.3857	44.4664	49.5798	23.4132	77.5939	49.3565	32.4159	-	10	56112585	56120718	-	4379	protein_coding	hypothetical protein	ATP-synt_ab
SORBI_3010G218300	41.0967	2.81544	3.14774	4.67039	8.22862	3.87372	4.02549	4.03311	2.25147	5.71556	9.02271	4.29163	3.98676	6.65367	6.20378	3.44807	5.504	3.45274	1.98667	1.76028	-	10	56105454	56111163	-	3190	protein_coding	hypothetical protein	-
SORBI_3010G218200	0.131865	5.36165	26.8129	0.337734	2.91564	1.18349	3.57835	5.31453	1.63889	5.64871	0.978371	0.610474	0.210663	20.7021	0.683732	0.220653	3.77436	0	0.340185	0.185758	-	10	56100666	56104151	-	2109	protein_coding	Cryptochrome DASH, chloroplastic/mitochondrial [Source:Projected from Arabidopsis thaliana (AT5G24850) UniProtKB/Swiss-Prot;Acc:Q84KJ5]	-
SORBI_3010G218100	2.04202	12.0126	29.4118	3.42442	9.95543	16.8106	14.0398	12.5995	16.3428	5.13213	12.9313	15.6434	27.1127	8.11716	7.36729	7.95071	4.75143	78.5756	69.0902	35.8717	-	10	56098010	56100677	+	2288	protein_coding	hypothetical protein	-
SORBI_3010G218000	2.17638	3.87455	8.48626	6.2227	4.58855	4.89382	4.52146	4.31454	4.24197	9.22079	4.93154	3.13674	2.70607	3.84881	4.77231	4.98167	3.39176	2.49194	3.13394	3.92873	-	10	56090147	56094718	-	2709	protein_coding	hypothetical protein	TBC
SORBI_3010G217900	21.9741	17.647	36.8584	24.6131	3.61524	18.3897	17.4581	19.0218	16.06	8.42111	10.9428	22.2449	19.2024	27.8338	49.3152	24.4151	36.2857	38.3297	35.6382	28.1895	-	10	56087900	56089481	+	1582	protein_coding	hypothetical protein	-
SORBI_3010G217800	57.9527	6.07085	30.6276	5.05008	2.40507	3.6831	4.48221	2.63502	3.04424	1.52686	4.74351	35.3491	6.9848	4.8211	4.35313	3.70366	5.32825	14.7493	20.6418	13.4453	-	10	56086537	56087522	-	811	protein_coding	hypothetical protein	-
SORBI_3010G217700	0.437899	0.0523104	0.437975	0.229556	0.10959	0.0734711	0.0218297	0.00602379	0.0248004	8.99989	0.0676266	0.118553	0.138073	0.0578617	0	0	0.0251306	0	0.181675	0.0541111	-	10	56077360	56086409	+	7240	protein_coding	hypothetical protein	-
SORBI_3010G217600	2.68361	1.69594	4.30392	6.20199	3.60668	3.2694	2.39207	1.997	2.42791	4.13347	3.38549	1.75411	2.62832	3.11836	3.56043	2.79521	2.54411	2.51133	2.38856	2.36776	-	10	56062028	56075161	+	3254	protein_coding	hypothetical protein	ELM2
SORBI_3010G217532	0.49581	0.131533	30.1219	2.35695	0.428649	0.232111	0.0320192	0	0.0363766	2.00694	1.64377	2.3997	5.76063	1.43336	0.926781	0.308547	2.10108	1.34365	2.18026	8.36017	-	10	56046745	56047978	+	1234	protein_coding	hypothetical protein	-
SORBI_3010G217466	0.0733784	0	0	0	0.130843	0	0	0	0	0	0.369104	0	0	0	0	0	0	0	0	0	-	10	56037103	56040185	-	1516	protein_coding	hypothetical protein	-
SORBI_3010G217400	27.4724	5.75038	5.17055	8.11991	7.5489	6.69794	9.8907	4.48867	3.21545	14.1337	24.3642	12.4964	11.2451	4.16475	7.98512	4.49636	8.0457	18.0697	7.01928	8.66197	-	10	56029460	56037659	+	3867	protein_coding	hypothetical protein	Pkinase_Tyr
SORBI_3010G217200	11.7999	7.99541	9.87557	14.6553	23.5783	10.1027	9.13462	10.1749	8.7227	13.1105	11.2982	7.69095	8.6602	7.90545	5.95063	8.75764	9.71862	11.8827	8.76307	10.8527	-	10	56020583	56024739	+	3309	protein_coding	hypothetical protein	UQ_con
SORBI_3010G217100	10.4649	2.1506	5.49581	6.23453	14.0569	2.30662	1.98939	1.91217	4.98523	4.28948	5.34994	5.23143	3.23771	1.90627	3.07854	3.06766	1.77519	2.05424	4.81066	4.9234	-	10	56014126	56019000	+	4151	protein_coding	hypothetical protein	UQ_con
SORBI_3010G217001	0.0634941	0	0	0	0	0	0	0	0.0512428	0	0	0	0	0	0	0	0	0	0.0682507	0	-	10	56014061	56015610	-	876	protein_coding	hypothetical protein	-
SORBI_3010G216901	0	0	0	0	0	0	0	0	0	0	0	0	0	0	0	0	0	0	0	0	-	10	56009773	56010443	-	636	protein_coding	hypothetical protein	-
SORBI_3010G216800	0	0.0639149	1.45675	0.0350601	0.234326	0.0483376	0	0.206083	0	0.353096	7.56053	29.0503	31.1632	0	0	0	0	97.6564	45.1674	11.9943	-	10	56005200	56006892	-	1693	protein_coding	hypothetical protein	-
SORBI_3010G216700	26.8241	0	0	0	0.088822	0	0	0	0	1.86996	1.10875	1.07233	0.940024	0	0	0	0	0.827312	1.23687	1.99987	-	10	55998521	56003550	+	3722	protein_coding	WAV6 [Source:Projected from Arabidopsis thaliana (AT5G57090) UniProtKB/TrEMBL;Acc:A0A384LBE9]	-
SORBI_3010G216600	3.73551	0	0	0.470836	0.0524477	0.0865527	0.0835784	0.0230631	0.11869	1.64836	2.03437	0.975886	0.20558	0	0	0.0223718	0	0	0.632338	0.863221	-	10	55972093	55973983	-	1891	protein_coding	hypothetical protein	-
SORBI_3010G216500	0	0	0	0.221811	0	0	0	0	0	0.0638256	0.0784139	0	0.0415068	0	0	0	0	0	0	0.0487997	-	10	55966647	55968029	-	1338	protein_coding	hypothetical protein	DUF295
SORBI_3010G216400	3.16487	0.0655011	0.319909	18.6118	0.960568	0.643984	0.813195	0.79199	2.39116	14.1125	1.35487	0.883265	0.874054	0.450814	1.02337	0.256085	0.66082	0.573525	1.73717	0.158097	-	10	55963248	55965140	-	826	protein_coding	hypothetical protein	-
SORBI_3010G216300	22.9377	38.5741	6.02267	18.8132	22.7226	19.672	30.675	31.8394	20.9097	10.7357	13.0026	33.2571	28.124	34.6115	34.9908	25.7025	27.0521	52.1307	34.5354	26.6478	-	10	55958756	55961276	+	1404	protein_coding	hypothetical protein	-
SORBI_3010G216200	66.5251	73.3567	69.9428	47.8178	25.3801	33.3679	50.187	56.1858	27.6579	61.4111	42.4626	55.9962	90.4862	99.9945	68.1552	44.0476	79.2079	197.843	136.024	53.7842	-	10	55953564	55956097	+	607	protein_coding	Glutaredoxin-C4 [Source:Projected from Arabidopsis thaliana (AT5G20500) UniProtKB/Swiss-Prot;Acc:Q8LFQ6]	-
SORBI_3010G216100	0.156855	0	0	0.70304	0.391568	0	0	0	0	13.9441	0	0.0484109	0	0	0	0	0	0	0.539538	0.184134	-	10	55946809	55949026	+	1773	protein_coding	Protein trichome birefringence-like 5 [Source:Projected from Arabidopsis thaliana (AT5G20590) UniProtKB/Swiss-Prot;Acc:F4K5K4]	-
SORBI_3010G216000	44.0116	2.62441	7.0699	29.0453	11.1208	12.8203	11.125	7.12515	7.91527	16.8328	8.27208	10.5714	8.16939	3.12566	13.0654	13.0411	5.87177	7.14826	5.45069	15.0829	-	10	55930935	55942426	-	6329	protein_coding	hypothetical protein	-
SORBI_3010G215900	2.08453	2.02768	0.28567	3.33681	3.77653	3.84848	1.13908	0.927251	3.12199	2.26191	3.2263	3.17039	3.46225	1.00641	2.15022	3.23196	1.39328	1.7925	2.28378	2.42353	-	10	55928034	55930808	-	2775	protein_coding	hypothetical protein	-
SORBI_3010G215800	7.93231	0.552457	0.209861	7.25291	8.70936	10.8771	0.470698	0.326572	1.20701	5.30472	12.2011	2.70235	2.94882	0.285173	0.795445	1.62712	0.464464	4.71635	6.49157	4.267	-	10	55922108	55925724	-	2938	protein_coding	hypothetical protein	-
SORBI_3010G215700	0	0	0	0	0.738223	0	0	0	0	0.103639	0.152793	0.312497	0.431348	0	0	0	0	0.287458	0.116092	0.126784	-	10	55903425	55906907	+	2060	protein_coding	hypothetical protein	SBP
SORBI_3010G215600	14.3812	26.9525	21.8771	9.57095	9.68874	4.32907	10.3725	19.7273	11.5809	4.37261	1.82036	7.97624	14.4692	12.43	6.25943	17.329	8.78847	18.1251	14.393	13.262	-	10	55841949	55848293	+	3535	protein_coding	hypothetical protein	UbiA
SORBI_3010G215500	0.632774	17.0652	1.40289	1.1142	1.58904	4.72486	11.7546	10.2829	10.9668	3.42469	2.53641	2.51444	2.25872	5.14977	5.17603	4.47597	3.36362	1.44841	1.68344	1.65278	-	10	55836741	55840286	+	3516	protein_coding	hypothetical protein	PPR
SORBI_3010G215400	1.01129	0.393483	0.320297	0.242823	4.77861	0.111594	0.161639	0.337004	0.204039	8.86982	1.73273	1.09241	1.08548	0.232733	0.113009	0.326904	0.0827027	0.161499	1.30446	0.831015	-	10	55828346	55836139	+	2200	protein_coding	hypothetical protein	-
SORBI_3010G215300	27.2155	0.224033	0.364727	0	53.5022	1.07307	0.16361	0.0902945	0.154895	6.33565	11.6817	10.6624	3.64108	0.0642464	0.617687	0.262765	0.18835	0.163468	2.31063	3.46973	-	10	55818499	55820486	-	1449	protein_coding	hypothetical protein	Pkinase
SORBI_3010G215201	0.0455038	0.0147543	0	0.0971203	0.261447	0.0334751	0	0	0.0367238	0.128086	0.085834	0	0.0302896	0.0380801	0.0406794	0	0	0	0.0489127	0	-	10	55802348	55808868	-	3667	protein_coding	hypothetical protein	-
SORBI_3010G215100	1.54846	0	0.0490432	0.330494	0.791515	0.341741	0	0.024283	0.19995	0.855889	0.272615	1.69658	2.53561	0.0259168	0.110743	0.0706656	0.0253265	0.659426	3.02933	4.03543	-	10	55799766	55802961	+	1796	protein_coding	AP2-like ethylene-responsive transcription factor AIL5 [Source:Projected from Arabidopsis thaliana (AT5G57390) UniProtKB/Swiss-Prot;Acc:Q6PQQ3]	AP2
SORBI_3010G215000	0	0	0	0	0	0	0	0	0	127.685	0	0	0	0	0	0	0	0	0	0	-	10	55791442	55792682	-	1241	protein_coding	hypothetical protein	-
SORBI_3010G214950	3.52349	7.46683	2.39135	5.50594	0.523568	2.40693	1.16211	0.888032	0.812465	2.0287	1.81984	1.16515	3.89506	2.4221	3.03743	0.382852	2.98441	2.14358	0.405798	3.24993	-	10	55780234	55780675	+	442	protein_coding	hypothetical protein	-
SORBI_3010G214900	56.9229	65.8801	46.9889	84.0744	4.42604	24.0802	24.2263	24.6987	10.047	21.6215	19.8058	35.0204	34.2111	38.6518	47.3754	21.2134	33.7553	66.8769	24.799	52.2888	-	10	55777184	55784716	-	2435	protein_coding	4-coumarate:coenzyme A ligase, Lignin biosynthesis, Defense against woundin [Source: Projected from Oryza sativa (Os06g0656500)]	AMP-binding
SORBI_3010G214800	0.444572	0.336348	0.0782252	39.3251	30.6227	6.35933	0	0.503516	0.558118	13.5758	6.4603	30.6817	24.7101	0.0413379	5.29916	1.20228	0.161586	8.51959	28.7257	16.0046	-	10	55772570	55777022	+	1126	protein_coding	hypothetical protein	-
SORBI_3010G214700	0.568676	1.59567	3.49832	0.0933648	0.910015	1.1746	0.870096	0.531648	0.123563	0.906711	0.357565	0.523164	1.13562	0.713848	0.586596	0.299447	0.286191	0	0.752341	0.333788	-	10	55759115	55762856	+	2543	protein_coding	hypothetical protein	-
SORBI_3010G214600	51.2329	32.3957	218.535	47.9244	0.203757	234.726	152.275	65.3176	79.4993	2.03957	1.04541	0.0529014	0	39.5753	52.7884	50.8705	35.0295	0	0	0	-	10	55745496	55749099	-	3245	protein_coding	hypothetical protein	Voltage_CLC
SORBI_3010G214500	2.30334	8.65716	15.4321	4.79973	8.13325	10.1367	9.85614	10.6012	13.2103	10.5885	6.71001	5.58406	5.6475	5.55456	6.2505	7.51562	6.78786	3.3954	3.3842	5.55183	-	10	55739274	55743777	+	4081	protein_coding	hypothetical protein	-
SORBI_3010G214400	2.06003	7.36029	11.3552	3.21304	5.95731	7.51908	8.24567	9.16354	12.0534	9.91452	5.23094	5.28812	4.46978	5.17184	4.85197	6.3277	4.47089	2.02449	2.25694	4.79009	-	10	55737595	55739273	+	1404	protein_coding	hypothetical protein	-
SORBI_3010G214300	0	0	0.19444	0.13103	0	0	0	0	0.049546	0	0	0	0	0	0.0548828	0	0	0	0	0	-	10	55733861	55734766	+	906	protein_coding	hypothetical protein	-
SORBI_3010G214200	20.0461	19.3621	97.9181	14.6132	10.7681	53.3108	74.8783	54.4231	66.8393	17.8456	28.8775	26.2871	6.34295	35.8747	28.6059	52.0762	34.5574	2.60512	6.9297	4.41922	-	10	55719173	55720354	-	1182	protein_coding	F-box protein AFR [Source:Projected from Arabidopsis thaliana (AT2G24540) UniProtKB/Swiss-Prot;Acc:Q8LAW2]	-
SORBI_3010G214150	0	0	0	0	0	0	0	0	0	0	0.0525114	0.0644389	0	0.0698897	0.373302	0	0	1.60044	0.359085	0	-	10	55717741	55718406	+	666	protein_coding	hypothetical protein	-
SORBI_3010G214100	1.33373	19.0144	13.0027	5.44863	3.75311	12.9851	13.9009	11.716	12.698	2.43174	4.33718	3.3767	2.28886	9.53951	5.10465	4.32721	4.07316	0	1.07524	1.71247	-	10	55704057	55708160	-	2669	protein_coding	hypothetical protein	2-Hacid_dh_C
SORBI_3010G214000	31.5499	203.833	877.438	79.2802	3.21046	27.4076	109.247	91.3512	25.7305	16.8628	8.86507	1.06863	2.62745	341.612	20.4541	22.7327	122.8	0.353883	3.33477	4.77999	-	10	55690072	55692293	-	2008	protein_coding	hypothetical protein	CCT
SORBI_3010G213900	0.8108	0	0.102719	0	0	0	0.0691167	0	0.0261742	0	0	0	0	0.0271408	0	0	0.0265227	0	0	0	-	10	55680090	55682020	+	1715	protein_coding	hypothetical protein	Pkinase_Tyr
SORBI_3010G213800	0.212024	0.309362	0.839405	1.73469	0.168028	1.35179	0.502055	0.748114	1.9678	0.434047	4.66598	0.408986	0.246984	0.680159	1.61113	1.29012	1.61832	0.300973	0.075969	0.0414828	-	10	55674876	55676449	-	1574	protein_coding	hypothetical protein	-
SORBI_3010G213700	0.113051	0.659804	0.268541	0.482575	0.167986	1.20591	2.08802	1.06371	0.95799	0.0867873	1.99031	0.654212	0.282195	0.378427	4.54791	2.36462	3.79054	0	0.303799	0.132711	-	10	55672502	55673485	+	984	protein_coding	hypothetical protein	-
SORBI_3010G213600	10.5386	0.223662	0.0364124	0.171764	0.364443	0.293196	0.304899	0.144232	0.0742268	0.982609	0.318064	0.544068	0.405596	0.256561	0.315185	0.122421	0.225646	0.685432	0.280113	0.449869	-	10	55655839	55666232	+	7257	protein_coding	Histidine kinase 5 [Source:Projected from Arabidopsis thaliana (AT5G10720) UniProtKB/Swiss-Prot;Acc:Q3S4A7]	HATPase_c
SORBI_3010G213500	11.0837	11.3296	26.7746	11.0571	8.47747	9.28065	13.3348	14.798	10.0297	14.0556	9.00438	5.85374	10.2732	14.935	16.2	11.6177	16.3203	15.0772	7.82877	14.4363	-	10	55635934	55642561	-	3849	protein_coding	hypothetical protein	UCH
SORBI_3010G213400	75.3394	29.0127	81.2349	71.1407	23.3709	42.3576	37.893	48.3995	19.9217	38.0123	37.287	73.3905	75.2828	46.8399	51.4735	41.0609	58.1481	153.453	134.805	49.8278	-	10	55632324	55634334	-	1904	protein_coding	hypothetical protein	-
SORBI_3010G213301	0	0	0	0	0	2.05089	0	0	0	0	0	0	0	0	0	0	0	0	0	0	-	10	55627247	55628064	-	818	protein_coding	hypothetical protein	-
SORBI_3010G213200	6.29251	2.22775	2.95777	4.8406	7.54627	3.54953	3.52233	3.81814	3.56202	3.34562	3.38332	5.9961	5.66128	3.7494	6.06267	4.36328	4.50955	7.83555	7.02681	4.92022	-	10	55613550	55618552	-	5003	protein_coding	hypothetical protein	-
SORBI_3010G213100	0.0422892	0.0822717	0.0334847	0.0789768	0.465008	0.342213	0.262861	0.157505	0.127985	1.01453	0.279196	0.122362	0.116118	0.0619323	0.0756112	0.112578	0.0605218	0.0225115	0.1591	0.186164	-	10	55603649	55610141	+	5261	protein_coding	hypothetical protein	-
SORBI_3010G213000	0.892384	0.116603	0	1.00918	6.08783	0.499714	0.123001	0.0835484	0.161238	0.674846	0.812343	0.143876	0.518656	0.0222924	0.107163	0.476136	0.0217847	0	0.257705	0.781777	-	10	55596807	55601708	+	4176	protein_coding	hypothetical protein	-
SORBI_3010G212900	0	0	0	0	0	0	0.133036	0	0	0	0	0	0	0.104482	0	0	0.255255	0	0	0	-	10	55589126	55590016	+	891	protein_coding	hypothetical protein	-
SORBI_3010G212800	15.8198	0	0	0.306951	0.0213701	0.0264498	0	0	0	0.138007	0.271281	0.305158	0.0358992	0	0	0	0	0	0.270532	1.81489	-	10	55583396	55585072	-	1547	protein_coding	hypothetical protein	-
SORBI_3010G212700	9.24939	0.0346044	0	2.4297	4.51437	0.654266	0	0	0.100486	3.57762	13.5215	13.1755	10.8337	0	0.0477043	0.040587	0.0581854	14.8088	15.6591	9.98098	-	10	55577962	55582897	+	3127	protein_coding	hypothetical protein	Tetraspannin
SORBI_3010G212600	0	0.120858	0.131171	0.162056	4.31604	0.223428	3.08915	0.11907	0	13.7668	2.86447	1.90668	6.97474	0.0693172	0.0123415	0	0.327403	1.7931	7.44934	3.79221	-	10	55569946	55577961	+	4029	protein_coding	hypothetical protein	-
SORBI_3010G212500	31.9748	0	0	0	0	0	0	0	0	0.0277991	0	0.167642	0	0	0	0	0	0	0.233545	0	-	10	55547056	55548674	+	1536	protein_coding	hypothetical protein	-
SORBI_3010G212350	0.894075	0.0915464	0.670672	1.25543	0.727198	0	0	0	0.113931	0.361247	0.177526	0	0.0469848	0	0	0.250538	0	0.100197	0.101163	0.331442	-	10	55544172	55546379	+	1182	protein_coding	hypothetical protein	-
SORBI_3010G212200	45.0562	25.1848	12.536	17.7213	10.2416	13.3765	18.5191	25.8313	12.7052	17.5001	18.7868	21.1022	13.5794	21.4428	24.5293	17.497	23.5342	13.814	16.5064	22.9175	-	10	55527108	55529067	+	1869	protein_coding	hypothetical protein	Epimerase
SORBI_3010G212100	0.0362351	25.5892	280.771	1.81744	0	0.479818	0.900918	38.7538	1.25747	1.05705	0	0.0279585	0	10.5526	0.259147	0	6.10437	0	0	0	-	10	55503549	55505211	-	1535	protein_coding	hypothetical protein	Epimerase
SORBI_3010G212000	14.505	0.106086	21.4735	5.43133	0	0.855797	0.232422	0.570095	3.02192	0.251173	3.72584	10.6029	26.0257	1.18648	2.89243	0.774212	0.862162	57.8231	11.9575	11.0957	-	10	55491039	55493825	-	1530	protein_coding	hypothetical protein	-
SORBI_3010G211900	1.2084	0	0.0546751	0	0.0205211	0.177793	0	0	0	0.0530097	0.607842	0.399593	0.827353	0.0866788	0.123461	0.0262602	0.11294	0	0.70513	1.94545	-	10	55488173	55490167	+	1611	protein_coding	hypothetical protein	-
SORBI_3010G211800	39.9338	0.104515	1.19106	19.397	29.1107	18.2457	0.368912	0.673982	2.48579	15.7545	12.8923	8.56668	9.33349	0.14986	17.4337	1.87962	0.175736	2.47847	8.50809	11.6251	-	10	55478177	55481282	+	3106	protein_coding	hypothetical protein	Pkinase_Tyr
SORBI_3010G211700	45.6031	0	2.13101	12.4458	31.7265	11.5494	0.955928	0.820661	2.05136	16.7583	6.39284	8.07565	9.70388	0.5005	13.5003	1.9333	0	5.09389	8.19669	9.30264	-	10	55476094	55477854	+	372	protein_coding	hypothetical protein	-
SORBI_3010G211600	0.251678	0.108806	0.575696	0	0.0332424	0	0.178786	0.0877069	0.0225685	0.214677	0.685737	1.18673	0.307137	0.23402	0	0.0425391	1.37214	0.357264	1.44284	1.08331	-	10	55462045	55464033	+	1989	protein_coding	hypothetical protein	-
SORBI_3010G211500	5.21446	57.3351	6.30028	9.95461	16.3461	10.8404	16.2163	15.87	19.405	7.96165	9.62961	7.67427	9.35242	29.4148	12.1202	20.33	20.9743	7.8544	5.25217	6.64276	-	10	55450139	55459589	+	2880	protein_coding	hypothetical protein	-
SORBI_3010G211400	0.554131	0	0	0	0.16468	0	0.0492051	0	0	0.159524	0.0435524	0.10689	0.0691607	0.521692	0	0	0	0	0	0	-	10	55446653	55447585	+	803	protein_coding	hypothetical protein	-
SORBI_3010G211300	29.6229	12.1965	9.12811	14.8392	12.0441	17.6174	16.1677	16.3313	21.8449	19.4565	20.3446	24.6906	26.6704	12.4323	12.5106	15.2091	16.3042	41.5654	26.8278	16.1491	-	10	55436839	55440828	-	1872	protein_coding	hypothetical protein	PP2C
SORBI_3010G211200	0.711784	0	0.0805133	3.22827	7.8116	0.112206	0.0361167	0	0.0205158	0.644003	0.0479515	0.0784576	2.33515	0.106368	0	0	0.0415781	0	0.983708	3.64071	-	10	55431939	55434730	-	2188	protein_coding	hypothetical protein	-
SORBI_3010G211100	0	0.0638771	0	0	0	0	0	0	0	5.14207	0	0.608023	1.37693	0.164864	0	0	0	0.559305	4.72936	21.3535	-	10	55430708	55431651	+	847	protein_coding	hypothetical protein	-
SORBI_3010G211000	0	0.0559648	0	0	0	0	0	0.112781	0.0232163	0.022084	0	0.0110981	0.0574461	0.0722211	0	0	0.0117627	0	0.030922	0.0337698	-	10	55422806	55428254	-	3867	protein_coding	hypothetical protein	Epimerase
SORBI_3010G210900	0	0	0	0	0	0	0	0	0	0	0	0	0	0	0	0	0	0	0	0	-	10	55423745	55425300	-	1556	protein_coding	hypothetical protein	-
SORBI_3010G210800	0	51.533	52.9698	0	0.0174549	1.20982	12.1205	21.2535	1.18502	3.2915	1.71724	1.40486	1.90594	20.8894	5.04064	1.7199	13.377	0.687836	2.20968	4.17137	-	10	55419800	55421793	+	1894	protein_coding	hypothetical protein	UDPGT
SORBI_3010G210700	3.43588	51.6268	53.8987	6.90194	4.2766	20.3994	39.3394	82.7238	24.2386	9.46461	9.53105	3.77389	2.62343	79.8327	18.4296	15.2188	64.4612	0.344282	5.17058	5.12482	-	10	55415865	55417827	-	1376	protein_coding	hypothetical protein	Epimerase
SORBI_3010G210600	12.0858	370.258	990.369	38.7853	3.3729	17.0809	26.5565	121.564	10.523	4.09036	25.1944	5.3144	2.50864	63.7296	6.89317	4.38208	22.8141	2.49041	0.605326	2.13579	-	10	55412773	55414336	-	1284	protein_coding	hypothetical protein	DnaJ
SORBI_3010G210500	9.54218	17.6683	39.4346	13.6668	9.12931	9.39046	10.9705	13.7498	10.3693	16.0645	8.44711	8.84806	9.44405	12.6085	7.03392	9.04038	10.1994	10.7828	8.05266	8.74517	-	10	55405378	55409126	-	1329	protein_coding	hypothetical protein	-
SORBI_3010G210400	0	0.360393	0.660062	0.444805	0.137633	0.136279	0.098697	0.254193	0.336385	0.426638	0.407674	0.607475	3.05194	0.116269	0	0.246575	0.227243	0.887507	24.7414	99.871	-	10	55403817	55405017	-	1201	protein_coding	hypothetical protein	-
SORBI_3010G210300	3.81975	1.43408	0.353741	0.405247	8.39102	1.2489	1.98352	3.83578	3.28102	6.89363	9.34007	7.99725	4.05926	4.99113	4.69281	2.42957	4.80439	0.713451	2.5932	6.39829	-	10	55401208	55404401	+	2490	protein_coding	hypothetical protein	-
SORBI_3010G210200	9.34325	9.19511	10.906	5.78119	4.95372	11.1975	11.9034	20.31	8.54938	4.25983	10.8393	6.39683	4.44551	42.0497	50.6649	16.0813	38.1505	0.980714	1.76817	5.2781	-	10	55395207	55398534	+	2536	protein_coding	hypothetical protein	-
SORBI_3010G210100	1.72887	0	0.213894	0.634214	7.32159	0	0.0191898	0	0	0.248855	0.0169852	0	0.080917	0	0	0	0.110458	0	0.116149	0.824499	-	10	55370341	55372973	-	2059	protein_coding	hypothetical protein	Acetyltransf_1
SORBI_3010G210050	0	0	0	0	0	0	0	0	0	0	0	0.201959	0	0	0	0	0	0	0	0	-	10	55369582	55370189	+	425	protein_coding	hypothetical protein	-
SORBI_3010G210000	60.9483	39.6063	67.7937	55.9049	50.626	54.4948	42.2149	42.6177	36.1361	42.6507	62.4482	62.4904	51.8632	52.8624	59.4758	51.7117	52.9033	59.8241	67.0821	39.6827	-	10	55364854	55367081	+	877	protein_coding	Similar to Ubiquitin-NEDD8-like protein RUB2 [Source: Projected from Oryza sativa (Os06g0650100)]	ubiquitin
SORBI_3010G209900	8.21672	6.19941	8.29935	4.74966	5.41601	3.13858	8.73672	14.269	3.59194	3.67958	5.84533	4.16564	4.78578	9.05806	7.32202	6.08938	7.45185	3.7571	4.16135	2.38051	-	10	55359086	55363561	-	2112	protein_coding	hypothetical protein	-
SORBI_3010G209800	2.35812	0.0249327	0.284134	1.44973	13.4828	0.603396	0.145665	0.18088	2.9581	1.61352	1.48271	0.870192	0.895743	0	0	0.0584864	0.0628845	0	1.37759	2.16644	-	10	55349810	55353436	-	2170	protein_coding	hypothetical protein	-
SORBI_3010G209700	8.8915	7.39166	3.90784	3.63664	13.2937	9.50906	10.0727	9.85882	10.337	12.9	9.92532	14.1442	16.1524	9.21097	6.58315	7.09058	7.52769	34.529	22.1467	21.2435	-	10	55342909	55347788	+	1420	protein_coding	hypothetical protein	-
SORBI_3010G209600	1.29893	2.30023	2.39104	4.28885	0.560891	1.4946	1.44324	1.21871	2.70586	7.75577	0.439775	0.37691	0.299296	1.16134	3.46379	1.5115	2.00649	0	0.274474	0.534342	-	10	55329808	55334817	+	5010	protein_coding	hypothetical protein	-
SORBI_3010G209501	0.423226	1.73341	0	4.06488	1.0327	4.17863	0.253179	0.261988	5.75265	0.410406	0.16807	0.12031	1.40119	0.130487	2.05108	19.1619	0.30968	0	2.37043	6.90333	-	10	55313400	55323792	+	2497	protein_coding	hypothetical protein	-
SORBI_3010G209400	12.9606	10.8492	11.5052	15.6622	16.0361	12.5291	12.5784	14.213	15.3066	9.15086	9.92822	9.69032	10.8447	13.6569	13.7079	14.148	12.7637	11.6606	6.96574	8.65729	-	10	55293227	55304915	+	3047	protein_coding	hypothetical protein	WD40
SORBI_3010G209300	0	0	0	0	0	0	0	0	0	0	0.785586	7.04082	6.21522	0	0	0	0	11.3065	8.77748	3.50959	-	10	55289386	55292520	+	2493	protein_coding	hypothetical protein	-
SORBI_3010G209200	97.1474	14.7799	10.9421	8.4376	0.0408647	13.6055	2.75947	5.60652	16.757	0.237512	4.62555	0.981399	0.137296	2.38774	32.637	2.14402	2.72694	0	0	0.242129	-	10	55268926	55270786	-	1618	protein_coding	hypothetical protein	WRKY
SORBI_3010G209100	66.47	67.2732	26.9568	32.6136	0.108988	67.0647	16.5862	38.1487	55.5929	1.19652	13.2588	1.72137	1.00697	13.299	97.18	15.109	13.8959	0	0.164252	0.609889	-	10	55261687	55263735	+	1820	protein_coding	hypothetical protein	WRKY
SORBI_3010G209000	12.3754	13.4259	30.5483	14.5829	10.8948	8.51865	11.3253	12.6082	9.65538	8.08907	11.439	12.1953	12.4662	13.9846	11.5049	8.82836	13.711	18.3463	13.0666	13.207	-	10	55222167	55229328	+	2027	protein_coding	hypothetical protein	NIF
SORBI_3010G208900	2.98125	3.01367	11.988	7.26753	1.633	4.90239	4.73393	3.82724	11.6762	4.21833	1.30481	2.23264	0.437751	4.89191	9.79844	13.8053	6.76441	0.186704	0.628351	1.61262	-	10	55217567	55219858	-	1903	protein_coding	hypothetical protein	-
SORBI_3010G208800	0	2.57247	1.62619	0	0	0.0413938	0.87937	1.90817	0.170291	0.0863922	0	0	0	0.011772	0.0251511	0	0.0460156	0	0	0	-	10	55207913	55212457	-	3954	protein_coding	hypothetical protein	Pkinase_Tyr
SORBI_3010G208750	0	0.107992	0	0	0	0	0.0788657	0.174101	0.0895981	0	0	0	0	0	0	0	0	0.236393	0.119337	0	-	10	55203981	55205673	+	501	protein_coding	hypothetical protein	-
SORBI_3010G208700	0.113454	15.6987	0.67375	1.15021	0.0674341	0.166926	7.95876	6.5385	0.480705	0.239517	1.17705	0.0218849	0	22.0983	2.81455	0.819784	12.5024	0	0.0304883	0.133185	-	10	55186846	55193934	-	1961	protein_coding	hypothetical protein	Peptidase_S28
SORBI_3010G208600	0	0	0	0	0	0	0	0	0	0	0.0377674	0	0	0	0	0	0	0	0	0	-	10	55169919	55181744	-	1852	protein_coding	hypothetical protein	Peptidase_S28
SORBI_3010G208500	1.84214	0.144508	0.282313	15.188	9.13023	2.57922	0.82316	0.792103	2.61371	3.17052	4.52103	0.917015	1.00867	0.273511	1.48746	0.926555	0.947635	0	0.574881	1.49981	-	10	55165583	55167454	-	1872	protein_coding	hypothetical protein	-
SORBI_3010G208400	22.6631	18.563	45.1159	55.5102	1.59942	3.41436	33.9348	28.7651	9.08532	11.0112	15.1967	1.39054	0.0492996	30.5972	12.602	5.2013	33.2114	0	0.132684	0.289809	-	10	55151625	55159501	-	2253	protein_coding	hypothetical protein	Peptidase_S28
SORBI_3010G208300	0.339566	0.198183	1.29057	0.507322	0.0403658	0	0.168853	0.133127	0	0.182476	0.0640524	0	0	0.454667	0.0910692	0	0.444312	0	0	0	-	10	55149008	55151215	+	1638	protein_coding	hypothetical protein	-
SORBI_3010G208200	0	0	0	0	0	0	0	0	0	0	0.312255	0.766362	0.826429	0	0	0	0	0	0.177939	0.194327	-	10	55136488	55137042	+	336	protein_coding	hypothetical protein	Response_reg
SORBI_3010G208100	0	0	0	0	0	0	0	0	0	0	0.17175	0.500558	0.102276	0	0	0	0	0.436217	0.036702	0	-	10	55121187	55130513	+	1629	protein_coding	hypothetical protein	Response_reg
SORBI_3010G208000	2.13652	454.653	70.9389	4.02805	6.26481	24.2049	109.631	176.794	30.922	26.5162	22.121	38.4653	16.0706	94.3446	11.842	7.20434	35.4107	32.7548	20.2099	7.02266	-	10	55103386	55105276	+	781	protein_coding	50S ribosomal protein L35, chloroplastic [Source:Projected from Arabidopsis thaliana (AT2G24090) UniProtKB/Swiss-Prot;Acc:Q8VZ55]	-
SORBI_3010G207900	0	0	0	0	0	0	0	0	0	0.333789	1.21973	8.2581	10.4861	0	0	0	0	32.1186	7.83746	4.51522	-	10	55095605	55100397	-	1663	protein_coding	hypothetical protein	UbiA
SORBI_3010G207800	0	0	0	0	0	0	0	0	0	118.379	0	0.0243912	0	0	0	0	0	0	0	0	-	10	55087922	55092555	-	3519	protein_coding	hypothetical protein	E1-E2_ATPase
SORBI_3010G207700	13.7048	6.00944	1.0836	7.96986	8.22712	2.83332	1.6388	1.8242	10.8553	3.58705	5.67921	1.81018	1.40548	2.56865	0.856403	1.96284	0.111917	0.749312	1.8283	5.1409	-	10	55080325	55084048	+	2845	protein_coding	hypothetical protein	Pkinase_Tyr
SORBI_3010G207600	23.5084	4.41236	105.698	30.5043	5.17826	14.116	3.93838	6.91586	20.4832	7.35147	12.6535	7.61105	6.54211	9.61058	8.91488	14.1839	9.03841	6.28576	9.32609	14.8338	-	10	55049781	55055477	-	1545	protein_coding	hypothetical protein	-
SORBI_3010G207500	23.5319	543.166	221.785	65.1402	18.2534	77.1492	163.686	271.626	88.1659	41.641	50.8747	41.9993	34.6507	447.722	79.4731	87.7199	267.048	27.8368	51.4071	68.6982	-	10	55038648	55041924	-	1170	protein_coding	hypothetical protein	Coprinus_mating
SORBI_3010G207450	0	0	0.128119	0	0	0	0	0	0	0.0310541	0.178042	1.8415	3.11002	0	0	0	0	6.63224	4.21774	2.37433	-	10	55034912	55036286	-	1375	protein_coding	hypothetical protein	-
SORBI_3010G207400	63.9295	15.8292	17.0664	30.3062	34.7142	34.7315	22.2228	15.3476	24.031	17.0864	26.1482	138.958	196.096	16.2481	53.3158	31.5433	22.8958	307.51	132.687	116.168	-	10	55027027	55032577	+	3876	protein_coding	hypothetical protein	Pkinase_Tyr
SORBI_3010G207325	0	0.0230034	0	0	0	0	0	0.0278139	0	0	0.00743465	0	0	0	0.274834	0.00899345	0.0580184	0	0.0127099	0	-	10	55010826	55015648	+	4704	protein_coding	hypothetical protein	-
SORBI_3010G207250	28.1902	34.6032	31.9432	35.4368	7.63236	115.204	25.8978	24.1259	15.3525	7.21374	32.0962	16.2589	16.525	48.7785	40.7549	27.3392	38.3363	22.2649	10.5753	11.0309	-	10	55003271	55008337	+	3149	protein_coding	hypothetical protein	-
SORBI_3010G207175	0	0	0.187408	0	0	0.261177	0.0420337	0	0.286523	0	0.0372049	0	0.118162	0.0495176	0.0528977	0.090011	0.0967797	1.38592	0.254415	1.11139	-	10	54996123	54997062	+	940	protein_coding	hypothetical protein	-
SORBI_3010G207100	14.226	189.596	300.999	20.7768	8.52095	12.92	31.4895	49.1896	16.3339	12.9477	11.7344	11.0049	8.8228	51.1797	24.6488	17.7922	26.2664	2.57632	10.0894	14.1607	-	10	54990387	54993938	-	1517	protein_coding	hypothetical protein	Methyltransf_11
SORBI_3010G206900	9.42711	16.1053	17.7167	13.4325	14.8164	16.8683	15.6071	16.9714	19.1304	15.3391	12.3032	10.1671	11.1881	12.9938	19.4756	18.0629	13.5473	9.82099	7.47463	9.68199	-	10	54970059	54987477	-	6319	protein_coding	hypothetical protein	Bromodomain
SORBI_3010G206800	0.807988	0.405653	0.825507	0.472851	0	0.0575226	0.444368	0.613106	0.273455	0	0.0491649	0.221218	0.104098	0.414426	0.30291	0.0594731	0.95918	0.332988	0.08405	0	-	10	54965847	54969011	-	2134	protein_coding	hypothetical protein	-
SORBI_3010G206700	0	0	0	0.0373313	0	0	0	0	0	0	0	0	0	0	0	0	0	0	0	0	-	10	54961046	54962635	+	1590	protein_coding	hypothetical protein	-
SORBI_3010G206600	0	0.861071	0.467276	0	0	0	0.209611	0.578412	0.238136	0.339783	0	0	0	0.246931	0.131893	0	0.241307	0	0	0	-	10	54960304	54960680	+	377	protein_coding	hypothetical protein	-
SORBI_3010G206501	0.512163	0.199278	0	0.327938	0.730598	0	0.0727656	0.0803172	0	1.49408	3.60675	1.42264	1.02276	0.771489	0	0	0.0837688	0.872434	0.770742	1.08222	-	10	54955057	54955922	+	543	protein_coding	hypothetical protein	-
SORBI_3010G206400	1.95101	0.166474	0	0.219163	2.27857	0.251802	0	0.16103	0	0.788296	3.83084	1.29409	1.12781	0.315084	0	0	0.475858	0	0.294339	0.482171	-	10	54951310	54952934	-	1625	protein_coding	hypothetical protein	-
SORBI_3010G206300	72.9655	46.9013	18.7296	27.8873	39.8324	22.3718	34.9782	33.2316	25.5543	23.4896	20.7607	54.4651	44.5468	40.2174	26.1047	32.5644	30.4421	57.1766	29.948	28.9519	-	10	54936834	54950795	+	3861	protein_coding	hypothetical protein	-
SORBI_3010G206200	266.845	107.851	30.814	93.1162	56.0812	48.6152	70.1995	72.3033	34.3702	53.0806	71.2148	164.867	140.704	102.669	93.2663	66.4131	88.8212	190.352	183.638	73.9137	-	10	54918479	54920768	+	909	protein_coding	hypothetical protein	-
SORBI_3010G206100	0	0	0.141156	0.0951229	0	0	0	0	0	0	0	0	0.0890001	0	0	0	0	0	0	1.04638	-	10	54914774	54915397	+	624	protein_coding	hypothetical protein	-
SORBI_3010G206000	8.02604	2.48777	2.66714	5.54735	4.57272	3.88528	5.30269	6.39103	3.45685	4.1981	6.58923	2.51883	4.04842	15.2603	16.1904	9.83694	22.5477	3.4091	2.05625	4.80857	-	10	54905556	54908230	-	2675	protein_coding	Amino acid transporter AVT6E [Source:Projected from Arabidopsis thaliana (AT1G80510) UniProtKB/Swiss-Prot;Acc:Q9M8L9]	Aa_trans
SORBI_3010G205900	21.5363	22.5244	1.57123	8.17478	13.2342	12.3011	15.7031	12.2073	15.7793	9.31948	7.34865	16.088	16.8706	16.0568	13.031	19.9096	14.6411	19.6042	11.716	10.4313	-	10	54896694	54905089	+	3812	protein_coding	hypothetical protein	WD40
SORBI_3010G205800	16.3557	16.0021	29.0296	16.0758	12.036	18.1531	20.3496	20.3911	18.1977	17.1643	15.2527	11.1102	11.8925	24.1317	25.4393	22.3952	27.0154	10.8402	8.08603	8.36245	-	10	54888681	54896125	+	2928	protein_coding	hypothetical protein	-
SORBI_3010G205700	0.0445518	2.02501	10.8779	0.172888	0.457388	0.783614	6.94828	7.09775	0.238613	0.62185	0.455843	0.156252	0.161759	21.204	13.0745	0.979614	30.6975	0.0172479	0.130607	0.180672	-	10	54864069	54880030	+	13733	protein_coding	hypothetical protein	NB-ARC
SORBI_3010G205600	1.15964	2.66516	0.789756	2.36606	3.92129	3.22232	2.20245	1.56885	5.29043	3.45488	2.97703	1.44182	2.61572	1.53362	4.71616	4.00338	1.71981	1.676	1.86009	1.55176	-	10	54837358	54848332	+	9257	protein_coding	hypothetical protein	NB-ARC
SORBI_3010G205500	75.4168	157.881	74.2636	87.2506	35.527	48.7931	137.636	108.714	35.3805	64.4769	48.0722	81.7693	144.52	130.97	113.193	66.1037	114.518	132.101	124.203	78.1317	-	10	54831210	54836195	+	2894	protein_coding	hypothetical protein	-
SORBI_3010G205400	240.443	114.051	35.2897	129.675	90.7888	56.1183	75.6525	73.7546	44.0161	57.9162	96.8734	190.621	140.459	105.157	103.904	100.6	100.994	195.683	194.794	85.7424	-	10	54815374	54817568	+	926	protein_coding	hypothetical protein	-
SORBI_3010G205300	102.668	37.8514	62.2315	61.3509	26.2647	46.6996	44.1578	52.102	26.4808	59.6188	65.3144	61.9996	51.7495	66.4622	70.9006	47.9486	65.2632	75.6004	63.5095	47.4865	-	10	54809790	54813168	+	1012	protein_coding	hypothetical protein	-
SORBI_3010G205200	52.0126	31.6544	46.4126	37.5066	23.9146	68.2881	77.7418	48.7101	90.0658	63.8008	26.39	32.161	28.1589	44.8374	68.3626	101.75	42.5357	20.222	44.0906	50.3291	-	10	54803495	54809477	-	3268	protein_coding	Purple acid phosphatase [Source:Projected from Arabidopsis thaliana (AT5G34850) UniProtKB/TrEMBL;Acc:A0A178UD94]	Metallophos
SORBI_3010G205100	10.5221	13.1923	5.92421	9.72249	5.37401	10.7976	10.9875	5.40219	8.18113	7.5169	5.34985	6.45839	6.85946	6.85601	10.5977	9.06915	7.0954	8.5961	6.32359	7.32312	-	10	54737939	54750024	-	5635	protein_coding	hypothetical protein	Glycos_transf_1
SORBI_3010G205000	1.08411	6.64948	7.7733	5.72035	1.73621	1.79444	3.29442	3.65993	2.23593	5.01665	6.74079	14.8244	22.461	0.88204	1.04993	0.412286	0.517171	40.7173	27.1262	12.9386	-	10	54732703	54736432	-	1847	protein_coding	Heptahelical transmembrane protein 1 [Source:Projected from Arabidopsis thaliana (AT5G20270) UniProtKB/Swiss-Prot;Acc:Q93ZH9]	-
SORBI_3010G204900	3.19237	6.8874	4.40732	2.88267	5.23017	3.9593	5.13158	5.80855	3.56731	6.66097	4.94094	4.18426	4.22957	4.55533	2.65267	3.39313	3.48094	6.23101	4.90531	4.75652	-	10	54727656	54731770	-	2718	protein_coding	hypothetical protein	H2TH
SORBI_3010G204700	301.048	0	0.0505344	89.5288	623.617	10.3292	0	0	0	75.7956	195.068	136.012	84.244	0	4.27916	0.242715	0	0.815373	37.766	18.2808	-	10	54708780	54710522	+	1743	protein_coding	hypothetical protein	-
SORBI_3010G204600	46.0346	29.2779	111.914	80.1029	24.8376	70.2033	40.859	38.6659	27.0364	18.8333	35.9318	23.701	30.9586	82.1034	44.8583	38.6987	64.2846	43.9843	25.5061	36.4707	-	10	54683698	54686395	+	2698	protein_coding	hypothetical protein	ESCRT-III
SORBI_3010G204500	66.3158	16.9053	22.2293	27.7073	23.4825	15.9168	18.7437	18.4545	10.6756	17.8792	24.0893	37.2701	31.755	24.9073	17.3923	19.2126	23.8221	40.6013	41.9383	28.2899	-	10	54677310	54681222	-	1581	protein_coding	hypothetical protein	Proteasome
SORBI_3010G204400	12.6076	11.0521	21.6393	18.6912	10.0626	14.6065	17.5905	15.4944	11.165	11.5913	9.82603	11.0094	12.4377	18.0374	19.4373	12.7906	18.8614	19.29	13.6739	12.3631	-	10	54664121	54674985	-	2947	protein_coding	hypothetical protein	PX
SORBI_3010G204300	142.405	111.247	174.414	75.7814	37.9958	122.865	92.9337	80.6229	63.7973	56.5035	77.9697	66.6966	67.9746	119.554	149.887	119.787	142.317	100.587	70.3528	55.5893	-	10	54660213	54663190	-	1460	protein_coding	hypothetical protein	CUE
SORBI_3010G204200	5.28801	0.0313646	0	0.0344097	0.019165	0.0711613	0.160337	0.227542	0.0520448	0.0247532	0.162192	0.049758	0.160974	0.107934	0.37473	0.245247	0.50101	0	0.0346595	0.0757032	-	10	54643882	54645731	+	1725	protein_coding	hypothetical protein	p450
SORBI_3010G204100	0.596364	1.19887	1.38513	0.0424279	0.0472617	0.0584957	1.07323	1.15343	0.0641725	8.17972	0.224985	4.2947	5.24	2.79479	0.390966	0.151198	2.14589	11.7671	6.49586	3.22036	-	10	54641353	54643476	+	1399	protein_coding	hypothetical protein	-
SORBI_3010G204000	0	0.0296948	0	0	0	0.0224576	0.0433718	0.0239365	0.271007	0	0	0	0	0.102188	0.218326	0.162534	0.0998605	0	0	0	-	10	54629144	54631313	-	1822	protein_coding	hypothetical protein	-
SORBI_3010G203800	0	0	0	0	0	0	0	0	0	0	0	0	0	0	0	0	0	0	0	0	-	10	54612359	54613687	-	810	protein_coding	hypothetical protein	p450
SORBI_3010G203700	0	0	0	0	0	0	0	0	0	0.16113	0	0	0	0	0	0	0	0	0	0	-	10	54610845	54611374	+	530	protein_coding	hypothetical protein	-
SORBI_3010G203600	12.3235	3.23749	1.61443	2.94384	0.623765	2.13964	2.32171	3.43255	0.0725962	3.68296	4.5059	6.10776	2.00588	16.2097	15.7347	3.80861	13.2659	0.957678	1.51483	0.950371	-	10	54604664	54607246	+	1855	protein_coding	hypothetical protein	p450
SORBI_3010G203500	0	0.712241	0.815968	0.0289404	0.0483562	0.0598505	0.096323	0.404014	0	5.01733	2.42131	1.54842	0.324931	1.31628	0.484874	0.144386	0.465732	0	0.845363	0.573034	-	10	54600170	54602528	+	2051	protein_coding	hypothetical protein	p450
SORBI_3010G203400	0	0.272107	0	0.0995083	0.0554226	0	0	0.10967	0	0.0715832	0	0	0	0.117049	0.0833593	0	0	0	0	0	-	10	54596710	54597902	+	1193	protein_coding	hypothetical protein	-
SORBI_3010G203300	6.1341	11.897	3.6353	9.99988	11.5641	9.82802	13.8211	10.9473	10.7514	8.37809	9.55949	8.24643	15.2555	12.1878	11.0011	14.283	12.895	36.219	26.9004	14.8877	-	10	54592608	54595819	-	1478	protein_coding	Elongator complex protein 4 [Source:Projected from Arabidopsis thaliana (AT3G11220) UniProtKB/Swiss-Prot;Acc:Q9C778]	-
SORBI_3010G203200	8.20844	9.24157	7.06151	4.21479	12.6137	24.9175	23.0657	10.6605	51.9099	32.6672	18.2759	19.155	19.8083	8.77317	39.0013	69.3273	11.5056	22.9037	22.616	17.2422	-	10	54588246	54592056	+	3056	protein_coding	hypothetical protein	Pkinase
SORBI_3010G203150	0	0	0	0	0	0	0	0	0	0	0	0	0	0	0	0	0	0	0	0	-	10	54581924	54585696	-	372	protein_coding	hypothetical protein	-
SORBI_3010G203100	0	0	0	0	0	0	0	0	0	0	0	0	0	0	0	0	0	0	0	0	-	10	54576127	54583871	-	7579	protein_coding	hypothetical protein	-
SORBI_3010G203000	0	0.0172709	0	0	0.0211063	0	0.00420427	0.0324841	0.00477641	0.0408911	0.0446554	0.0228327	0.0295467	0	0.0211636	0.00900301	0.0387201	0	0.0254469	0.0138953	-	10	54574474	54583871	-	9398	protein_coding	hypothetical protein	-
SORBI_3010G202900	4.0937	6.0885	0.845583	2.08936	4.98979	4.27727	5.62647	5.07065	2.56165	3.55259	4.34593	2.72375	3.88012	3.94715	1.85635	4.55768	4.34244	4.80048	3.50754	5.39764	-	10	54567812	54571263	+	1875	protein_coding	hypothetical protein	-
SORBI_3010G202800	0.076376	0.0928663	0.0302374	0	0.102141	0.0983263	0.0813835	0.119773	0.0154098	0.586328	0.396188	0.117861	0.0953245	0.127831	0.0341392	0.0435687	0.21861	0	0.0615732	0.358635	-	10	54564143	54567693	-	2913	protein_coding	hypothetical protein	-
SORBI_3010G202700	0.265599	0	0	0.0236199	0.907723	1.17234	0	0	0	1.22338	0.0835	0.0170777	0.0662985	0	0	0	0	0	0.071374	0.545632	-	10	54551925	54555535	-	2513	protein_coding	hypothetical protein	AP2
SORBI_3010G202600	51.4471	50.1437	246.758	95.4896	43.914	76.7505	68.6097	74.731	66.3166	51.1875	41.0408	41.2891	65.4208	62.1846	127.399	61.2968	67.7027	88.9338	59.2209	74.44	-	10	54543809	54549879	-	3798	protein_coding	Probable E3 ubiquitin ligase SUD1 [Source:Projected from Arabidopsis thaliana (AT4G34100) UniProtKB/Swiss-Prot;Acc:F4JKK0]	-
SORBI_3010G202500	29.295	9.85808	16.6132	23.5314	12.4003	20.5317	14.4267	9.93304	13.9618	20.362	17.3992	12.1265	9.68422	12.8873	14.8994	15.4467	11.7196	10.3681	6.29791	7.57503	-	10	54529454	54532939	-	1405	protein_coding	hypothetical protein	C2
SORBI_3010G202450	0	0	0	0	0	0	0	0	0	0	0	0	0	0	0	0	0	0	0	0	-	10	54525980	54526550	+	491	protein_coding	hypothetical protein	-
SORBI_3010G202400	0	0.0676299	0.055051	0.222588	0	0	0	0.0272577	0	1.6546	0.0655736	0.0536454	0.03471	0	0	0	0	0	0	0	-	10	54521624	54527580	-	1600	protein_coding	hypothetical protein	Lipase_GDSL
SORBI_3010G202300	1.18996	10.7909	9.30054	4.54699	0.0228154	9.71409	11.3163	8.84886	38.8168	8.36896	2.48598	3.67262	4.59926	10.3437	11.1527	11.4449	6.15276	0	5.77658	4.23577	-	10	54517092	54519083	-	1449	protein_coding	hypothetical protein	Lipase_GDSL
SORBI_3010G202200	0	0	0	0	0	0	0	0	0	1.41601	0	0	0	0	0	0	0	0	0	0	-	10	54505986	54513333	-	2533	protein_coding	hypothetical protein	-
SORBI_3010G202100	30.2739	0	0.15239	12.241	31.5152	1.69901	0	0	0.155324	10.7118	38.3852	6.01422	7.41762	0	0.137644	0.263492	0	0.245881	6.20632	8.65315	-	10	54489605	54493065	-	2890	protein_coding	hypothetical protein	Pkinase
SORBI_3010G202000	0.559615	2.7691	2.46598	1.9474	3.1382	1.96892	1.78027	2.38475	3.024	1.84918	3.38099	1.08886	0.947465	1.83254	0.696046	1.92464	1.79081	1.08797	1.93538	2.17075	-	10	54480991	54484388	+	2286	protein_coding	hypothetical protein	-
SORBI_3010G201900	2.18677	4.66787	3.23853	2.80902	5.92111	3.30679	3.6822	4.47712	3.67672	3.54403	3.37377	1.64041	2.46647	4.93085	7.11374	3.54211	7.41825	1.33652	3.09059	4.04076	-	10	54476734	54479480	+	2747	protein_coding	hypothetical protein	-
SORBI_3010G201700	1.48286	94.5966	223.086	3.53896	4.95172	5.45438	11.9512	14.6079	5.33094	7.01652	5.5434	8.21713	7.69913	37.5892	3.30206	4.24487	14.0009	14.5242	10.694	6.89971	-	10	54468592	54472568	+	2063	protein_coding	hypothetical protein	-
SORBI_3010G201600	0.304891	52.3668	38.3503	0.371851	3.23606	1.40985	17.4817	15.9149	3.30426	2.90904	1.97183	2.25168	1.39166	10.8621	0.506194	0.0993857	3.63322	0	1.77911	1.53392	-	10	54463608	54466520	-	1277	protein_coding	hypothetical protein	-
SORBI_3010G201500	9.90562	12.8913	14.4882	23.0159	16.6538	19.556	12.8535	14.5983	27.0757	20.8544	20.1735	14.7621	14.7728	10.1894	23.0535	22.337	13.8213	8.86232	6.66392	13.2114	-	10	54455594	54463482	+	5733	protein_coding	hypothetical protein	-
SORBI_3010G201444	3.95804	3.30973	4.17865	7.33622	6.60366	4.39317	5.22876	5.9892	10.4236	7.67629	4.58442	5.25068	6.17067	3.66096	5.64902	8.60892	4.03188	4.28783	2.16459	3.50517	-	10	54454831	54455631	-	801	protein_coding	hypothetical protein	-
SORBI_3010G201388	28.4599	0.976398	5.70379	25.1415	5.08878	6.55901	2.51667	1.06484	7.24318	20.8511	33.7846	27.0619	52.6472	3.11298	15.0966	9.79037	4.00783	46.141	18.2155	29.9437	-	10	54442696	54443637	-	942	protein_coding	hypothetical protein	Myb_DNA-binding
SORBI_3010G201332	0	0.530431	0	0	0	0	0.258246	0.427571	0	0	0	0	0	0	0	0.691261	0.297297	0	0	0	-	10	54430492	54430839	+	306	protein_coding	hypothetical protein	-
SORBI_3010G201266	0	1.06656	0.473557	0.319122	0	0.0733293	0.354047	1.32869	0.160891	0.153044	0	0.230733	0.199054	0.166833	0	0.0758157	0.081517	0.212245	0.107146	0.117014	-	10	54428668	54430301	+	558	protein_coding	hypothetical protein	-
SORBI_3010G201200	0.0296486	0	0.0704277	0	0	0	0.0526542	0.0813661	0	0.125185	0.447411	0.560474	1.16934	0.062029	3.67097	0.0676522	1.12746	0	0.0796743	1.16596	-	10	54402415	54406166	+	3752	protein_coding	hypothetical protein	-
SORBI_3010G201100	0	0	0	0	0	0	0	0	0	253.232	0	0	0	0	0	0	0	0	0.0669514	0	-	10	54387809	54388701	+	893	protein_coding	hypothetical protein	-
SORBI_3010G201000	0.272651	0	0.431772	0.290964	0	0	0	0	0	1.04655	0.457158	0.350623	0.725961	0	0	0	0	0.387035	0.879229	0	-	10	54379623	54380234	+	612	protein_coding	hypothetical protein	-
SORBI_3010G200900	1.36709	0	0.432985	0.750295	0.34824	0	0.166482	0.0918797	0	5.12752	6.38545	4.67137	4.524	0.0653743	0	0	0.0958282	0.166338	3.44282	1.8341	-	10	54376817	54380917	-	1424	protein_coding	hypothetical protein	Lipase_GDSL
SORBI_3010G200800	0.0621809	3.38717	2.8064	3.88191	0.27719	0.388822	1.52393	3.92486	0.326189	1.33659	1.99397	0.263879	0.620861	2.10747	1.30633	0.638479	1.50011	2.51562	1.23652	0.948935	-	10	54375337	54377217	+	1789	protein_coding	Serine/threonine-protein kinase HT1 [Source:Projected from Arabidopsis thaliana (AT1G62400) UniProtKB/Swiss-Prot;Acc:Q2MHE4]	Pkinase_Tyr
SORBI_3010G200700	1.50527	0.312046	78.4293	31.4427	0.0586682	66.4778	2.71709	4.89525	4.06268	3.86454	6.14425	0.837763	2.78419	0.805375	48.8193	17.4551	3.20867	1.52376	1.98938	11.761	-	10	54365052	54368590	-	2254	protein_coding	hypothetical protein	-
SORBI_3010G200600	0	0	0	0	0	0	0	0	0	5.69888	0.0692527	0.0509897	0.0439889	0	0	0	0	0.0469041	0.378852	1.08608	-	10	54360187	54363927	+	2525	protein_coding	hypothetical protein	-
SORBI_3010G200400	0	0	0	0	0	0	0	0	0	0	0.821219	18.209	25.4971	0	0	0	0	78.6356	20.139	16.6539	-	10	54342220	54343493	+	1235	protein_coding	hypothetical protein	-
SORBI_3010G200300	0	0	0	0	0	0	0	0	0	0.0743244	0.0608748	3.24954	1.40169	0	0	0	0	2.06149	2.96596	1.30702	-	10	54336906	54338270	+	1149	protein_coding	hypothetical protein	-
SORBI_3010G200200	0	0	0	0	0	0	0	0	0	0	0	1.33074	8.86855	0	0	0	0	21.1159	8.89862	6.27632	-	10	54320740	54321384	+	645	protein_coding	hypothetical protein	-
SORBI_3010G200100	0	0	0	0	0	0	0	0	0	0	0.149936	1.10396	0.892862	0	0	0	0	0.253875	2.24284	1.11973	-	10	54313144	54314539	+	933	protein_coding	hypothetical protein	-
SORBI_3010G200000	0	0	0	0.0358002	0	0	0	0.0263041	0	0	0	0	0.0334958	0.0280739	0	0	0	0	0	0	-	10	54291623	54294047	-	1658	protein_coding	hypothetical protein	-
SORBI_3010G199900	21.6481	12.9521	99.8011	7.36906	0.311719	7.9735	9.00345	18.7334	0.681913	8.32067	6.04555	1.07909	3.11281	12.1426	7.18898	3.03604	5.26585	1.11671	2.38023	6.08818	-	10	54280301	54283373	-	1909	protein_coding	hypothetical protein	-
SORBI_3010G199800	16.4002	12.7565	24.0441	12.3714	15.7159	21.3542	20.9447	19.9929	24.8754	29.3616	24.3546	22.2094	23.6059	20.3705	19.6121	19.8797	21.9221	30.8392	42.8456	39.2193	-	10	54273447	54277948	-	1828	protein_coding	hypothetical protein	UBX
SORBI_3010G199700	24.3635	0.245767	0.171476	32.105	1.79135	5.37693	0.0384604	0.183958	0.771934	5.1677	10.8935	6.21047	4.09042	0	0.258138	0.137265	0	0.230564	3.744	4.13119	-	10	54265216	54271541	-	3082	protein_coding	hypothetical protein	Pkinase
SORBI_3010G199600	16.8255	18.2799	30.1432	17.9556	4.1909	70.9939	32.5036	119.874	106.116	18.7245	9.34252	14.9203	14.2315	18.8415	45.233	39.5892	19.1301	31.2513	17.5655	15.2045	-	10	54257957	54262722	-	1838	protein_coding	nudix hydrolase homolog 10 [Source:Projected from Arabidopsis thaliana (AT4G25434) TAIR;Acc:AT4G25434]	NUDIX
SORBI_3010G199500	1.58351	0	0	0.0301763	0.0504213	0	0	0	0	0.0217079	0.0711187	0.0436363	0.112936	0	0	0	0	0.12042	0.273558	0.331947	-	10	54251511	54254690	+	1967	protein_coding	hypothetical protein	-
SORBI_3010G199300	9.95121	2.35555	3.23565	5.08772	4.20553	10.8001	11.1278	5.34028	8.91666	2.99186	8.04132	6.10171	4.94913	1.99485	3.01049	5.66947	2.53734	3.30323	6.14145	6.12964	-	10	54241359	54245613	+	1470	protein_coding	hypothetical protein	-
SORBI_3010G199200	109.676	13.5493	156.027	138.556	57.859	144.282	143.545	54.0832	96.3521	40.2713	39.4321	64.4361	65.4885	26.5751	239.08	121.74	46.9234	99.7258	84.2727	64.4689	-	10	54233583	54235989	+	1741	protein_coding	hypothetical protein	Aa_trans
SORBI_3010G199100	9.97744	13.3942	18.3027	19.4162	13.3365	12.9529	13.085	14.266	16.141	12.4078	17.6282	15.9891	13.2078	12.6567	14.005	11.0227	14.473	20.3797	18.0527	14.5216	-	10	54231210	54232441	-	1232	protein_coding	hypothetical protein	-
SORBI_3010G199000	1.02484	1.99378	1.62294	0	0	0	0.860389	2.55683	0.150381	0.21457	1.34735	0.359433	0.0930252	3.1187	0.249868	0	2.13337	0.9919	0.400587	0.437481	-	10	54227450	54228046	+	597	protein_coding	hypothetical protein	bZIP_1
SORBI_3010G198900	0.146178	0	0	0	0	0	0	0	0	0	0	0.225578	9.34115	0	0	0	0	0.77814	27.8904	38.0095	-	10	54204520	54206418	-	761	protein_coding	hypothetical protein	-
SORBI_3010G198800	1.2204	0.21584	0.409954	3.2362	0.483584	0.856988	0.249575	0.101491	2.41754	0.198734	0.511567	3.05322	14.0317	0.572547	2.72754	0.478183	4.41557	28.2695	6.73803	7.77103	-	10	54191191	54194198	+	3008	protein_coding	hypothetical protein	-
SORBI_3010G198700	0	0	0.366497	0	0.0458524	0	0	0.362931	0.249036	0	0.0485057	0.35714	0.539185	0	0	0	0	0	0.497539	0.271681	-	10	54187083	54187803	+	721	protein_coding	hypothetical protein	-
SORBI_3010G198600	17.4609	0	0.10055	0.948623	0.0377392	0	0	0	0	0	0.958153	7.00574	0.69737	0.212541	0.283812	0.0965871	1.35005	0.135197	1.50151	1.78888	-	10	54174418	54175293	-	876	protein_coding	hypothetical protein	-
SORBI_3010G198500	16.8877	0	0.122676	2.23208	0.23022	0.683863	0.11006	0	0	0	2.338	6.45538	1.00553	1.42622	1.73133	0.294604	4.24456	1.31959	0.666157	0.545632	-	10	54156868	54157585	+	718	protein_coding	hypothetical protein	-
SORBI_3010G198400	0.208752	0.925046	0	0	0.0137863	0.0341266	0.0823847	0.145495	0	6.69514	0.714619	5.79853	6.99411	0.271748	0.0414711	0	0.075874	9.03804	3.51545	2.859	-	10	54144341	54149623	+	2398	protein_coding	hypothetical protein	-
SORBI_3010G198200	0.0453308	0	0	0.193502	0.350264	0	0	0	0	0	0.0570051	0	0.0452616	0.0379352	0	0	0	0	0	0	-	10	54136938	54139325	-	1227	protein_coding	hypothetical protein	B3
SORBI_3010G198100	0	0	0	5.64555	0	0	0	0	0.118596	0.225624	1.24737	0.0566926	0.0733633	0	0	0.0558853	0	0	0.473878	0.258761	-	10	54131592	54132348	+	757	protein_coding	hypothetical protein	-
SORBI_3010G198000	5.94252	7.15803	4.83723	0	0.0495151	0.428993	1.30193	4.46356	0.672322	2.92052	0.698404	2.7211	1.9963	3.53224	0.943337	0.0844836	1.99841	0.118255	1.22381	1.98848	-	10	54112865	54118570	-	2003	protein_coding	Tryptophan synthase beta chain [Source:Projected from Arabidopsis thaliana (AT5G38530) UniProtKB/TrEMBL;Acc:Q9FFW8]	PALP
SORBI_3010G197900	5.83355	6.12391	4.20743	6.59519	7.9645	4.84385	6.56477	5.75156	5.17408	7.53779	5.55639	7.53152	7.15106	6.38021	5.7314	5.3156	5.10129	11.8064	11.6719	7.5261	-	10	54109275	54111679	-	963	protein_coding	Protein RDM1 [Source:Projected from Arabidopsis thaliana (AT3G22680) UniProtKB/Swiss-Prot;Acc:Q9LUJ3]	-
SORBI_3010G197800	10.7562	10.0498	13.4476	15.1035	11.6928	18.0122	17.5943	13.3167	9.70875	14.2331	17.7978	19.7655	23.5993	14.2127	16.9542	13.1329	16.0881	34.9573	24.9495	21.1001	-	10	54108777	54109182	-	393	protein_coding	hypothetical protein	-
SORBI_3010G197700	1.88989	0.791903	1.15109	16.3518	0	14.4806	0.90879	0.957509	97.4973	0.0669619	0	0	0	0.243317	2.20937	4.97578	0.784659	0	0	0.0682635	-	10	54097649	54099647	+	1913	protein_coding	hypothetical protein	p450
SORBI_3010G197632	0.0944327	0	0.747721	0	0	0	0	0.0740446	0.152423	0	0	0	0	0.158053	0	0	0	0	0	0	-	10	54090819	54091407	+	589	protein_coding	hypothetical protein	-
SORBI_3010G197566	0	0	0	0	0	0	0	0.0272236	0.0140102	0	0	0	0	0	0	0.0528154	0	0	0	0	-	10	54060915	54065679	-	3204	protein_coding	hypothetical protein	-
SORBI_3010G197500	21.5407	5.56729	152.103	31.4274	7.70049	21.2563	8.93233	9.07059	39.4998	22.4481	13.1842	15.0147	18.0098	7.31508	12.5123	10.8434	9.29019	22.6008	16.9463	27.7301	-	10	54053675	54058568	-	3207	protein_coding	Potassium transporter, Salt stress response, Alkali toleranc [Source: Projected from Oryza sativa (Os06g0625900)]	K_trans
SORBI_3010G197400	0.202784	0.0281791	1.58272	0.680129	0.370198	0.181146	0.102895	0.124931	0.292244	0.255751	0.491802	0.178818	0.202475	0.109093	0.0517956	0.0330509	0.0710726	0.0925257	0.0311394	0.306066	-	10	54049894	54053733	-	3840	protein_coding	hypothetical protein	-
SORBI_3010G197300	0.658513	0	0	118.412	0.0698933	10.0348	0	0	0.113882	1.84158	9.59713	9.10951	2.60655	0	0.567671	0.017888	0	0	1.69377	0.0552169	-	10	54044273	54050703	+	2365	protein_coding	hypothetical protein	-
SORBI_3010G197200	77.915	43.0605	8.04696	24.7686	23.7539	13.8413	21.4957	27.4237	24.6795	30.4694	27.46	50.6518	54.9875	37.2372	17.3931	32.1032	28.3027	11.1122	49.2571	63.8968	-	10	54033299	54034513	+	1215	protein_coding	hypothetical protein	-
SORBI_3010G197000	26.9004	327.787	129.956	27.9178	15.8423	40.6846	82.4266	103.382	52.5928	39.2109	27.5381	47.4734	46.2624	197.879	63.7581	65.7306	111.407	65.3543	28.2846	34.7077	-	10	54018902	54030000	-	4737	protein_coding	hypothetical protein	-
SORBI_3010G196900	0.843321	0.0621456	0	0.0272716	0.653141	0	0	0	0	0.215802	0.0803414	0.0492951	0.153097	0	0	0	0.0208989	0.0272072	0.178552	0.119998	-	10	54005238	54018674	+	4353	protein_coding	hypothetical protein	ABC2_membrane
SORBI_3010G196800	0.160754	0	1.68017	0	0	0	0	0	0	0	0.505384	0.967477	1.66929	0	0.0287421	0.0489077	0.0525855	3.42291	2.73018	1.4342	-	10	54001095	54003423	+	1730	protein_coding	hypothetical protein	F-box
SORBI_3010G196700	0	0	0	0.0279457	0	0.077058	0.130217	0	0	0.603098	0.0493963	0.141438	0.104588	0	0	0	0.0856619	0.111519	0	0.0614821	-	10	53992529	53994652	+	2124	protein_coding	hypothetical protein	-
SORBI_3010G196600	46.8331	1.1261	0.416658	3.93091	3.03385	14.8651	5.04643	0.99025	2.80289	0.848332	38.3144	43.9313	8.09134	9.33573	6.02142	5.24312	3.39965	3.36139	3.5635	2.53269	-	10	53984493	53985549	+	1057	protein_coding	hypothetical protein	-
SORBI_3010G196500	0.273153	26.7697	22.9801	0.255063	0	22.9582	58.3095	43.6122	7.10944	9.25284	0.751406	0.790355	0.443197	38.7459	35.6217	29.9694	54.701	0.0727028	2.38563	3.76773	-	10	53970214	53975080	+	1629	protein_coding	hypothetical protein	-
SORBI_3010G196466	0	6.92741	8.13719	0.0962021	0	4.31062	17.4825	9.0476	1.96433	2.14535	0	0.139113	0.18002	10.3353	4.6742	9.66779	10.6897	0	2.42251	2.64562	-	10	53969429	53970146	-	617	protein_coding	hypothetical protein	-
SORBI_3010G196433	0	0	0	0	0	0	0.181246	0.0666854	0	0	0	0	0	0	0	0	0	0	0	0	-	10	53965424	53966648	+	654	protein_coding	hypothetical protein	-
SORBI_3010G196400	0.505644	0.0245927	0	0.161882	2.46444	0.464975	0.0538796	0	0.632522	1.59152	0.429209	0.331626	0.0504873	0.0211575	0.0904069	0.0961481	0	0	0	0	-	10	53960381	53962986	+	2200	protein_coding	hypothetical protein	-
SORBI_3010G196300	0.341141	0.764669	5.16745	5.87236	1.73673	1.09114	0.600578	0.616386	0.215466	18.002	1.53879	0.629439	0.38505	0.558558	0.371271	0.338441	0.43667	0	0.414527	0.591999	-	10	53946265	53952387	+	3750	protein_coding	hypothetical protein	-
SORBI_3010G196200	1.40789	0.365197	0.475634	1.7829	6.12545	1.06334	0.506731	0.103033	2.39366	18.0136	2.76193	0.738688	0.918416	0.062837	0.201379	3.48379	0.0460545	0	1.0089	1.16793	-	10	53939846	53944067	+	2963	protein_coding	hypothetical protein	Peptidase_S8
SORBI_3010G196100	2.30155	0.149252	0	0	0	0.451506	0	0	0	0.117791	0.916523	2.07182	0.153203	0	0.0685845	0	0	0	0	0	-	10	53929584	53930308	-	725	protein_coding	hypothetical protein	-
SORBI_3010G196000	8.48338	0	0	0.219028	1.05726	0	0	0	0.110427	0.262604	0.0430167	0.105575	1.09296	0	0	0	0	0	0.661855	1.76687	-	10	53919038	53919850	+	813	protein_coding	hypothetical protein	-
SORBI_3010G195901	0.403293	0.163456	0	0	0.0199756	0.0494475	0	0.0527036	0.108492	0	0.169052	0.181519	0.167783	0	0	0	0	0	0.252878	0.118358	-	10	53906800	53908454	-	1655	protein_coding	hypothetical protein	zf-B_box
SORBI_3010G195800	0	0	0.254718	0.13732	0	0	0	0.025224	0	0.395136	0	0.198572	0.224842	0.269211	0	0	0.26308	0.273992	1.48691	1.77491	-	10	53887427	53896948	-	1729	protein_coding	hypothetical protein	Epimerase
SORBI_3010G195701	73.7708	46.5104	28.1243	12.7044	21.5757	13.4239	43.2549	49.1977	25.0432	23.2974	17.9158	29.0626	20.6555	64.5119	40.3897	29.0199	45.1673	21.6088	26.4324	16.9535	-	10	53881271	53883417	-	570	protein_coding	hypothetical protein	Epimerase
SORBI_3010G195600	0	0	0	0	0	0	0	0	0	0	0.579656	1.69362	2.1478	0	0	0	0	1.1217	2.8313	3.81354	-	10	53869197	53872886	-	1267	protein_coding	hypothetical protein	Epimerase
SORBI_3010G195500	4.7675	2.413	9.6368	2.10954	0.161266	9.66629	4.40549	22.7027	28.8414	8.48036	6.26339	2.00376	3.7153	6.71438	7.83106	28.1838	9.60446	0.49519	2.66649	5.23262	-	10	53858700	53860870	-	1435	protein_coding	hypothetical protein	Epimerase
SORBI_3010G195450	0	0	0	0	0	0	0	0	0	0	0	0	0	0	0	0	0	0	0	0	-	10	53852252	53853310	-	618	protein_coding	hypothetical protein	Epimerase
SORBI_3010G195400	0	0	0	0	0	0	0	0	0	0	0.170229	6.17401	3.15375	0	0	0	0	0.384314	3.07183	5.50885	-	10	53851530	53853484	-	1849	protein_coding	hypothetical protein	-
SORBI_3010G195301	0	0	0	0	0	0	0	0	0	0	1.35706	102.659	45.2998	0	0	0	0	9.28697	56.1143	51.7813	-	10	53845747	53847552	-	1237	protein_coding	hypothetical protein	Epimerase
SORBI_3010G195200	0.450548	5.5136	1.54206	1.93875	5.69277	1.12265	2.47787	1.56124	3.69478	2.58852	4.49609	2.22039	1.88651	4.05017	1.6371	2.43197	3.07839	0.680826	2.31214	7.19991	-	10	53838135	53842307	+	3827	protein_coding	hypothetical protein	-
SORBI_3010G195100	3.35643	12.895	10.5859	7.55504	9.17017	17.4502	14.5865	13.3358	23.7191	8.4446	11.0132	7.89991	5.21002	10.1732	16.7931	22.2681	11.0256	7.38704	6.85193	7.35054	-	10	53814305	53818489	-	1972	protein_coding	hypothetical protein	-
SORBI_3010G195000	19.7473	3.47674	9.15133	22.4652	9.05527	5.78328	6.74411	7.9295	3.78552	4.97643	7.8215	4.91485	3.28776	8.40805	14.2991	5.16595	12.4591	2.61675	1.9462	4.09671	-	10	53805664	53814555	+	5929	protein_coding	hypothetical protein	Sec7
SORBI_3010G194900	60.5014	79.5948	52.5704	91.8269	9.80026	54.3737	45.3213	38.9235	29.8785	20.9953	54.408	34.6044	46.4922	89.6711	106.208	66.0496	75.8707	120.961	66.4044	58.3775	-	10	53796883	53799591	+	1265	protein_coding	bZIP transcription factor, Endoplasmic reticulum stress respons [Source: Projected from Oryza sativa (Os06g0622700)]	bZIP_1
SORBI_3010G194801	0	0	0	0	0	0	0	0	0	0	0	0	0	0	0	0	0	0	0	0	-	10	53767913	53768825	-	906	protein_coding	hypothetical protein	-
SORBI_3010G194700	10.8684	9.80972	11.8226	8.25316	18.0069	9.22433	10.2552	9.476	8.87121	11.51	14.8345	17.0424	24.5454	11.0973	10.0111	8.81554	8.93876	50.4558	24.4515	24.6941	-	10	53735853	53742541	+	2697	protein_coding	hypothetical protein	ARID
SORBI_3010G194600	0.394281	0.251277	0.0215306	0.885055	4.69509	3.1606	0.183506	0.213211	1.07531	4.56114	6.68506	4.66824	2.87794	0.0341334	1.30052	1.12717	0.0778307	0.260546	1.87065	1.70776	-	10	53712704	53721636	-	4091	protein_coding	hypothetical protein	zf-CW
SORBI_3010G194500	10.0511	0	0	0.839773	2.89138	0.105255	0	0	0	0.164756	0.224904	0.0551978	0.214287	0	0.0319767	0.108824	0	0	0.192243	0.629846	-	10	53707267	53710736	+	1555	protein_coding	Expansin-A20 [Source:Projected from Arabidopsis thaliana (AT4G38210) UniProtKB/Swiss-Prot;Acc:Q9SZM1]	-
SORBI_3010G194400	0	0	0	0	0	0	0	0	0	0	0	0.253194	0.573381	0	0	0	0	0	0.264547	0	-	10	53704657	53705334	+	678	protein_coding	hypothetical protein	-
SORBI_3010G194300	3.78571	9.81991	1.5372	0.103589	0	2.64216	8.82635	15.0702	1.25344	1.11778	0	1.64775	1.25998	12.8348	15.9672	12.6989	8.09707	0	1.14775	1.70927	-	10	53688115	53688687	-	573	protein_coding	hypothetical protein	-
SORBI_3010G194200	6.40041	4.17499	1.86816	5.06246	3.86391	3.80373	3.72651	4.50686	2.34977	7.03306	3.83499	3.85395	3.9597	3.59181	2.71506	2.78725	3.92054	6.30644	7.52741	6.15814	-	10	53675748	53678041	+	2216	protein_coding	hypothetical protein	-
SORBI_3010G194100	1.72356	0.384211	0.113727	1.49446	0.128055	6.97372	2.16817	0.225241	1.27508	0.303223	0.383818	0.0554116	0	1.44237	10.0475	10.9245	1.64444	0	0.231585	0.0843047	-	10	53646777	53648481	+	1549	protein_coding	hypothetical protein	2OG-FeII_Oxy
SORBI_3010G194001	0	1.95556	0.884353	0	0	0.657314	1.90418	3.59057	1.26193	0	0	0	0	2.61707	0	0	0.456691	0	0	0.131112	-	10	53646043	53646540	+	498	protein_coding	hypothetical protein	-
SORBI_3010G193900	28.2855	16.4244	13.1302	12.8115	6.51951	39.8059	31.5357	33.5218	15.4392	16.3106	9.77495	7.36374	5.00169	24.6465	16.2915	17.3753	26.9811	3.58609	7.1021	5.67774	-	10	53635408	53638862	-	1288	protein_coding	hypothetical protein	-
SORBI_3010G193800	24.8257	24.6463	24.8189	21.9428	30.1197	18.5977	23.3974	25.2906	24.0273	15.4358	16.9084	28.3818	32.6594	25.4063	28.8347	27.9632	27.9893	52.3768	33.8151	29.4991	-	10	53616933	53619867	-	2935	protein_coding	hypothetical protein	KH_1
SORBI_3010G193700	1.71003	0.321005	0.522598	0.192093	3.83377	0.04414	0.106558	0.235233	0.145271	2.62553	1.32043	20.4628	10.9934	0.401696	0.268197	0.13691	0.490685	18.5251	9.9646	4.93051	-	10	53612046	53616000	+	1854	protein_coding	hypothetical protein	-
SORBI_3010G193600	22.8219	39.1977	18.4962	37.5841	12.7657	2.19752	16.8699	12.1327	8.29307	20.8222	12.246	23.9935	17.9254	15.3739	2.64375	8.52011	9.45395	21.4986	14.8666	14.3773	-	10	53583824	53588443	-	1862	protein_coding	hypothetical protein	-
SORBI_3010G193501	0	0.162474	0	0	0	0	0.355961	0	0	5.64196	0.105023	0.128878	1.00065	0.139779	0	0	0	0	0	0.196078	-	10	53574123	53575746	+	333	protein_coding	hypothetical protein	-
SORBI_3010G193400	0	0	0	0	0	0	0	0	0	0	0	0	0	0	0	0	0	0	0	0	-	10	53540621	53542157	+	1214	protein_coding	hypothetical protein	Lipase_GDSL
SORBI_3010G193300	2.06961	10.5272	11.198	10.0308	0.0256276	6.94651	18.9901	9.70288	2.40102	4.10443	4.09369	1.13113	1.98035	22.0104	28.9477	9.9368	23.3779	0	1.4831	0.354309	-	10	53532486	53534748	-	1290	protein_coding	hypothetical protein	-
SORBI_3010G193200	0.316284	0.879024	1.3595	1.54298	0	0.465352	3.37021	1.80684	0	0.728421	9.85824	2.12664	2.7971	11.7973	6.58406	1.54649	13.1175	0	0.339978	1.85645	-	10	53526107	53527337	+	1231	protein_coding	hypothetical protein	-
SORBI_3010G193100	0	0.808487	0.210595	0	0	0.171204	0.0944691	1.12094	0	0	0.0418083	0.0513046	0	5.25839	0.951083	0	2.3654	0	0.0357368	0	-	10	53517628	53519300	+	1673	protein_coding	hypothetical protein	-
SORBI_3010G193000	0.128653	38.5444	9.57556	0	0	0.220836	10.571	5.74996	0	0.460903	0.377499	0.165444	0.256913	115.81	16.3318	0	61.3383	0	0.0460968	0.151027	-	10	53512116	53513412	+	1297	protein_coding	hypothetical protein	-
SORBI_3010G192900	7.48575	13.1238	10.4071	0.55734	0	3.07364	7.23454	3.78792	0.105372	0.267289	0.410477	0.470132	0.521465	26.7333	18.3254	0.0331026	23.2059	0	0	0	-	10	53508986	53510263	+	1278	protein_coding	hypothetical protein	-
SORBI_3010G192800	2.58314	20.2231	10.1607	1.64509	0	12.8117	46.3781	40.7701	1.31135	4.47783	6.07764	4.21126	3.0784	97.8697	150.847	4.18298	64.4988	0	1.43311	4.79312	-	10	53501384	53502718	+	1335	protein_coding	hypothetical protein	-
SORBI_3010G192700	0	0	0	0	0	0	0.0206435	0	0.0234528	0	0	0	0	0	0	0	0	0	0	0.0341139	-	10	53485041	53486954	-	1914	protein_coding	hypothetical protein	-
SORBI_3010G192600	39.6634	12.5372	12.0682	24.2066	21.4621	12.8679	13.1887	12.8731	9.98902	25.4626	12.767	21.8429	21.525	12.3268	18.9751	11.048	11.6069	37.953	24.0525	18.8527	-	10	53477729	53484983	+	2175	protein_coding	hypothetical protein	-
SORBI_3010G192500	30.2594	0.488001	0.0627213	10.9048	76.8225	3.13706	1.16294	0.351962	1.57691	16.9662	18.7356	24.509	26.9178	0.13258	0.495704	1.05437	0.377884	14.899	13.7229	21.2946	-	10	53464000	53468212	-	4213	protein_coding	hypothetical protein	C2
SORBI_3010G192432	0.899933	0.145898	0.237523	0.746961	0	0.71721	1.11876	0.137207	6.79887	1.05549	0.267206	0.192882	0.67392	0.0209198	0.826868	7.20614	0.960838	0.212913	0.564287	2.11288	-	10	53454267	53458180	-	2225	protein_coding	hypothetical protein	bZIP_1
SORBI_3010G192366	2.91514	0.340276	0	1.11994	0	1.97297	2.56785	0	17.1273	2.77501	1.68631	0.539828	1.16428	0.292745	1.4594	13.9243	3.5283	0	1.75477	6.98112	-	10	53452812	53453964	-	477	protein_coding	hypothetical protein	-
SORBI_3010G192300	0	0	0	0	0	0	0	0	0	0	0	0	0	0	0	0	0	0	0	0	-	10	53428519	53428941	+	327	protein_coding	hypothetical protein	Response_reg
SORBI_3010G192200	0	0	0	0	0	0	0	0	0	0	0.0871266	0.171066	0.0553423	0	0	0	0	0	0.238316	0.0650663	-	10	53386834	53395818	+	2007	protein_coding	hypothetical protein	Response_reg
SORBI_3010G191900	0	0	0	0	0	0	0	0	0	2.20166	0.0263249	0.0161522	0.0418036	0	0	0	0	0	0.0225019	0.0245743	-	10	53353487	53362746	+	2657	protein_coding	hypothetical protein	Response_reg
SORBI_3010G191800	2.046	0.339071	1.05602	6.55026	1.20708	0.925388	0.785927	0.404037	4.073	0.418849	0.228704	0.0350814	0.0302649	0.646832	0.514851	3.60804	0.731254	0	0.0651636	0.213495	-	10	53341921	53345590	-	3670	protein_coding	hypothetical protein	C2
SORBI_3010G191750	0.166231	0.0970184	0	0	0	0.0244577	0.448728	0.234615	0	0.0255226	0	0	0	0.918132	1.96161	0.303444	0.706903	0	0	0	-	10	53332359	53334146	-	1673	protein_coding	hypothetical protein	-
SORBI_3010G191700	5.50554	0	0	0	0.0176884	0	0	0	0	0	0	0	0.0297143	0.049809	0	0	0	0	0.0959672	0.0349353	-	10	53317185	53319296	+	1869	protein_coding	hypothetical protein	p450
SORBI_3010G191600	1.1823	0	0	0.0280381	0.0936974	0	0	0	0	0	0.0165199	0.0202722	0.0787001	0	0	0	0	0	0.16945	0	-	10	53308907	53313840	+	2117	protein_coding	hypothetical protein	p450
SORBI_3010G191500	0	0	0	0	0	0	0	0	0	0	6.90485	5.28201	10.3952	0	0	0	0	0	12.2641	1.50678	-	10	53304569	53305202	+	390	protein_coding	hypothetical protein	-
SORBI_3010G191450	0	0	0	0	0	0	0	0	0	0	0.29225	2.03225	0.464089	0	0	0	0	0	0.333079	0	-	10	53283232	53283680	+	359	protein_coding	hypothetical protein	-
SORBI_3010G191400	0	0	0	0	0	0	0	0	0	0	0.0869965	11.85	2.62484	0	0	0	0	0	0.148725	0	-	10	53281026	53281913	+	402	protein_coding	hypothetical protein	-
SORBI_3010G191301	0	0	0	0	0	0	0	0	0	0	0.212384	10.8594	3.93474	0	0	0	0	0	1.3313	0	-	10	53251242	53252608	+	494	protein_coding	hypothetical protein	-
SORBI_3010G191200	0	0	0.100093	0.0674508	0.450812	0.18599	0	0	0	0.824874	0.397416	0.146306	0.504873	0	0.113009	0.0961481	0	0.403748	0.339702	1.18716	-	10	53248799	53249678	+	880	protein_coding	hypothetical protein	-
SORBI_3010G191100	2.52822	2.68033	11.7412	3.6378	4.44058	1.08668	0.52467	1.33643	0.137555	15.3308	21.1122	11.1565	6.29673	3.09042	0.863437	0.0432126	2.25342	3.87115	4.85507	8.27013	-	10	53235608	53243265	-	1958	protein_coding	hypothetical protein	HLH
SORBI_3010G191000	2.14883	0.0440048	0	0.217247	4.0064	0.01664	0	0.0177358	0.0182548	1.3718	1.43645	0.855184	1.21958	0.0378581	0	0.0172042	0.0369959	1.20408	0.583531	0.716933	-	10	53230494	53233257	+	2459	protein_coding	Protein gamma response 1 [Source:Projected from Arabidopsis thaliana (AT3G52115) UniProtKB/Swiss-Prot;Acc:Q9ZRT1]	-
SORBI_3010G190900	0.765012	1.77282	0	0.648313	1.69845	1.22488	1.90206	2.2406	1.12585	0.91548	1.03277	1.45832	1.48276	0.960305	1.24712	0.992597	1.41685	1.62893	0.773949	1.05654	-	10	53227210	53230194	-	2472	protein_coding	hypothetical protein	PPR
SORBI_3010G190800	0.154288	0.938002	0.020361	0.260697	0.634291	0.179713	0.365342	0.534316	0.249036	8.95245	113.188	31.9045	17.6519	0.204435	0.172413	0.293378	0.189264	1.17721	12.0377	15.833	-	10	53220093	53226700	-	4326	protein_coding	hypothetical protein	-
SORBI_3010G190700	9.17578	19.3513	42.1394	3.12513	2.10031	0.172346	25.1715	34.0295	0.110292	15.632	53.2998	11.373	10.5458	39.75	0.22689	0.0445474	12.7726	0.20785	8.75094	6.80671	-	10	53209485	53216921	-	2849	protein_coding	hypothetical protein	-
SORBI_3010G190600	46.363	84.9898	221.079	63.1828	89.4578	555.127	291.288	147.781	413.313	144.97	76.5383	141.747	352.464	282.917	383.279	669.804	257.737	736.48	572.483	444.46	-	10	53203941	53206205	+	2265	protein_coding	hypothetical protein	zf-A20
SORBI_3010G190500	1.36613	0	0	0	0.115998	0	0	0	0	4094.64	0.368133	0	1.16918	0	0	0	0	1.66222	0.629343	3.43653	-	10	53196049	53196333	-	285	protein_coding	hypothetical protein	-
SORBI_3010G190400	0.0222084	0.280835	0.175847	0.959851	0.910804	5.3751	2.31911	0.835851	1.15605	1.19343	0.600448	0.257035	0.110873	0.362411	1.5883	1.05573	1.10788	0	0.143232	0.247671	-	10	53173542	53180148	+	5009	protein_coding	hypothetical protein	-
SORBI_3010G190350	0	0	0	0	0	0	0	0	0	0	0	0	0	0	0	0	0	0	0	0.0867118	-	10	53162638	53164411	+	753	protein_coding	hypothetical protein	-
SORBI_3010G190300	4.57286	0	0	0.331973	0.147917	0.0228847	0	0	0	0.0238811	0	0	0.0621208	0	0	0	0	0	0	0.0730358	-	10	53128017	53130382	-	1788	protein_coding	hypothetical protein	-
SORBI_3010G190200	0.228892	0	0	0.0488532	0.0272095	0	0	0	0	0.0351435	0	0	0	0	0	0	0	0	0	0	-	10	53126694	53128164	+	1215	protein_coding	hypothetical protein	-
SORBI_3010G190100	0	0	0	0	0	0	0	0	0	21.2977	0	0	0	0	0	0	0	0	0	0	-	10	53118844	53120076	+	1233	protein_coding	hypothetical protein	-
SORBI_3010G190001	0	0	0	0	0	0	0	0	0	21.5837	0	0	0	0	0	0	0	0	0	0	-	10	53114949	53116499	-	1551	protein_coding	hypothetical protein	-
SORBI_3010G189900	8.97433	1.6292	1.42514	4.82857	1.41153	21.406	1.29634	2.46973	1.95694	12.1669	0.628721	0.424341	0.0748801	0.0836792	0.648085	0.874624	0.102217	0.159685	0.134354	0.645604	-	10	53105677	53108123	-	2225	protein_coding	IQ-domain 33 [Source:Projected from Arabidopsis thaliana (AT5G35670) UniProtKB/TrEMBL;Acc:Q8L8M9]	-
SORBI_3010G189800	6.04543	6.93167	0.601239	2.64916	13.1405	2.67486	3.31944	4.17917	3.87723	9.45013	14.1763	18.0837	15.2072	1.06315	2.2845	2.46567	0.740394	24.9365	18.145	15.7535	-	10	53100683	53105829	+	3809	protein_coding	hypothetical protein	-
SORBI_3010G189700	1.70028	1.37239	0.572888	1.58285	0.0215021	11.6965	1.34918	1.29064	5.54722	6.16537	1.4444	26.2801	66.4626	1.01418	11.9337	5.95712	0.75441	0	76.2948	80.5399	-	10	53091840	53095972	+	3075	protein_coding	hypothetical protein	-
SORBI_3010G189600	1.2707	1.21436	0.10591	2.83104	2.0538	0.541197	0.411745	0.402037	0.917564	0.667445	0.770939	1.13526	0.779063	0.615645	0.338799	0.661283	0.492238	0.99683	0.503222	0.706588	-	10	53070428	53077804	-	2495	protein_coding	MLO-like protein 13 [Source:Projected from Arabidopsis thaliana (AT4G24250) UniProtKB/Swiss-Prot;Acc:Q94KB2]	-
SORBI_3010G189500	0.323295	0.0820378	0	1.42504	5.27182	0.134428	0.0199705	0	0	1.2949	2.34211	0.32537	0.294733	0.0117631	0	0	0.0344856	0	0.377733	0.132007	-	10	53013373	53022128	+	3957	protein_coding	GRAS family nuclear protein, Control of tillerin [Source: Projected from Oryza sativa (Os06g0610350)]	GRAS
SORBI_3010G189432	0.193403	0.00482382	0	0.0476293	0.0235803	0	0	0	0	0.727138	0.0436534	0.0153054	0.009903	0	0.00443329	0	0	0	0	0.00582151	-	10	53003312	53018455	+	11216	protein_coding	hypothetical protein	-
SORBI_3010G189366	0	0	0.313457	0	0	0	0.0468703	0	0	0	0	0	0	0	0	0	0	0	0	0	-	10	53000019	53001351	-	843	protein_coding	hypothetical protein	-
SORBI_3010G189300	0.947615	2173.13	2815.54	25.0617	21.8928	18.1251	184.3	220.129	150.327	42.8575	117.327	99.3115	35.6253	479.395	9.57643	1.81756	143.67	0	83.0383	23.3607	-	10	52995915	52997505	+	1350	protein_coding	hypothetical protein	-
SORBI_3010G189200	0.823838	5.49511	2.31107	0.351669	0.83943	0.813853	2.50815	2.80536	0.32294	0.524029	1.02121	1.08971	0.728573	2.30467	1.5782	1.23532	2.00194	1.15275	0.910856	0.884218	-	10	52971236	52973598	+	2363	protein_coding	hypothetical protein	PPR
SORBI_3010G189100	5.94721	9.42932	4.06594	3.74649	18.4218	7.30468	8.72868	6.63531	6.51235	6.87856	11.5477	19.9319	17.1605	5.30582	3.58349	4.98177	4.9493	41.2814	25.1485	23.0667	-	10	52960355	52965049	+	2123	protein_coding	hypothetical protein	-
SORBI_3010G189000	13.5158	8.08885	9.4684	12.8345	19.1304	16.8862	13.6371	17.1	16.8425	13.6645	18.9843	13.3981	11.0706	13.7454	10.4649	15.002	12.9453	9.80437	10.1698	10.2728	-	10	52921829	52927726	-	2428	protein_coding	hypothetical protein	-
SORBI_3010G188900	2.63945	0.989543	0.0870801	1.05627	3.77497	0.991088	1.46484	1.68154	0.621296	0.907599	1.71146	3.47913	1.53733	1.0584	0.983169	1.40111	1.05678	1.17086	1.95056	2.09793	-	10	52919010	52921032	-	2023	protein_coding	hypothetical protein	-
SORBI_3010G188800	3.91492	11.7347	25.0743	9.09847	4.05057	7.42408	7.39557	7.98118	10.7424	18.745	11.0862	12.5303	20.0949	8.37255	6.84415	7.89638	7.73128	46.4963	22.0073	22.6384	-	10	52914348	52917539	-	1918	protein_coding	hypothetical protein	-
SORBI_3010G188700	0	0	0	0	0	0	0	0	0	0	0.0390537	0.0479244	0	0	0	0	0	0	0	0	-	10	52911385	52913656	+	1791	protein_coding	hypothetical protein	-
SORBI_3010G188600	1.54855	4.24732	5.50761	6.55606	3.908	4.66885	4.81498	5.73269	2.43804	3.19612	4.53319	2.0371	1.16598	4.35511	4.22119	2.49081	3.96527	0.324325	2.26489	1.78806	-	10	52907122	52910518	+	2191	protein_coding	hypothetical protein	C2
SORBI_3010G188500	0	0	0	0	0	0	0	0	0	3.42044	0.118373	0.04842	0.125316	0	0	0	0	0.623565	0.022485	0.171891	-	10	52896453	52900041	+	2659	protein_coding	hypothetical protein	Peptidase_S8
SORBI_3010G188400	15.9126	20.3357	22.5635	18.4258	11.991	23.6142	30.1697	27.0909	25.5516	15.0101	26.0483	35.2391	24.8552	29.6943	61.1859	49.8592	38.3666	48.3312	29.2155	31.348	-	10	52888931	52894165	-	3041	protein_coding	hypothetical protein	-
SORBI_3010G188300	1.16728	21.5734	190.073	0.747409	1.52636	5.51724	94.0735	121.73	3.57979	12.3886	1.96331	2.52184	0.815849	7.69263	1.7479	0.887831	2.45808	0.745642	1.31746	1.33603	-	10	52886125	52888931	+	1906	protein_coding	hypothetical protein	-
SORBI_3010G188200	10.6121	5.02078	6.80065	8.10812	10.1118	8.87007	6.95195	5.95743	8.13128	7.41771	9.26891	6.97748	7.09146	4.69958	8.60107	8.38566	4.89646	3.16524	5.68137	6.15615	-	10	52881972	52886124	+	1347	protein_coding	hypothetical protein	-
SORBI_3010G188100	33.8889	28.5345	102.904	56.2186	11.2117	34.4015	33.6779	44.4558	26.3949	23.4557	24.5101	33.0381	34.983	47.1467	40.106	31.3947	49.7389	72.4647	36.5433	44.2871	-	10	52874994	52878681	+	1551	protein_coding	hypothetical protein	ESCRT-III
SORBI_3010G188000	28.2716	13.8369	3.84412	7.02885	18.3333	7.23829	10.082	9.05998	7.69259	9.82694	10.1652	17.9432	19.0506	15.8857	13.1941	10.9302	11.3021	18.0561	12.1245	11.2085	-	10	52864783	52870776	-	3437	protein_coding	hypothetical protein	GTP_EFTU
SORBI_3010G187950	0.188332	0.183196	0	0.33497	2.12686	0.18473	0.133787	0	0.151993	0.192774	0.355252	0.339068	0.626818	0.420285	0.168365	0.334239	0.102678	1.20304	0.607323	1.47391	-	10	52847448	52848333	+	886	protein_coding	hypothetical protein	-
SORBI_3010G187900	6.44379	2.51306	1.64127	2.51661	17.1949	1.06079	1.86728	1.88441	1.73348	4.85456	5.98775	6.59448	7.88873	3.00422	2.29618	1.57659	2.54272	10.2026	5.68329	6.6828	-	10	52844983	52860711	-	3703	protein_coding	hypothetical protein	-
SORBI_3010G187800	0.0592973	0	0.281711	0.18984	0	0	0	0	0.239279	81.4838	0.149137	0.091506	0.236827	0.0496232	0	0.180406	0	0.252522	0	0.487269	-	10	52843824	52844761	+	938	protein_coding	hypothetical protein	-
SORBI_3010G187700	0	0	0	0	0.0311222	0	0	0	0.0105645	12.5716	0.0246924	0.161605	0.0784223	0	0	0	0	0.139366	0.14071	0	-	10	52835247	52841087	+	4249	protein_coding	hypothetical protein	C2
SORBI_3010G187600	46.018	35.3885	24.9092	19.6876	17.3481	33.8027	32.5923	32.2234	32.611	26.7664	34.8428	42.2258	47.9754	27.5074	37.2621	32.9855	34.1711	75.5596	52.1292	31.3541	-	10	52826240	52830779	+	1616	protein_coding	hypothetical protein	AAA
SORBI_3010G187500	39.9088	15.9968	18.6337	15.1279	5.60331	1.30999	1.88505	6.46107	0.309966	1.87631	2.61252	2.1283	1.56881	2.80506	1.27977	2.57602	1.74179	1.26388	1.38866	1.63952	-	10	52816320	52821510	-	1593	protein_coding	hypothetical protein	CRAL_TRIO_N
SORBI_3010G187400	0	0	0.0402935	0	0	0	0	0	0	0	0	0	0	0	0	0	0	0	0	0	-	10	52813290	52815929	-	2186	protein_coding	hypothetical protein	ABC2_membrane
SORBI_3010G187350	0	0	0	0	0	0	0	0	0	0	0	0	0	0	0	0	0	0	0	0	-	10	52797394	52799989	-	2179	protein_coding	hypothetical protein	ABC2_membrane
SORBI_3010G187300	0	0	0	0	0	0	0	0	0	0	0	0	0	0	0	0	0	0	0	0	-	10	52781436	52783844	-	1992	protein_coding	hypothetical protein	ABC2_membrane
SORBI_3010G187201	0	0	0	0	0	0	0	0	0	0.0238811	0	0	0	0	0	0	0	0	0	0	-	10	52765281	52767441	-	1788	protein_coding	hypothetical protein	ABC2_membrane
SORBI_3010G187100	24.6238	14.9752	50.9221	41.5585	6.05108	14.7353	5.02716	1.88208	3.23973	11.1514	15.1184	20.3725	29.9167	6.92657	3.84767	1.95158	2.43677	46.5272	30.5166	34.1045	-	10	52759140	52761578	+	1344	protein_coding	hypothetical protein	-
SORBI_3010G187000	5.73505	6.37559	13.8393	4.95449	5.62716	6.83079	6.66073	7.06647	6.75901	4.82202	5.78107	2.95006	2.18145	6.7801	3.98767	7.20088	9.0824	0	3.03341	2.13728	-	10	52748586	52752073	+	611	protein_coding	hypothetical protein	-
SORBI_3010G186900	0	0	0	0.0774892	0	0.106835	0	0	0.351608	0.278716	0	0	0	0	0.194741	0.0552287	0	0	0	0	-	10	52746094	52753198	-	766	protein_coding	hypothetical protein	-
SORBI_3010G186700	13.5656	17.7693	37.7256	19.959	16.7161	20.0489	22.8238	16.7676	16.2887	13.0478	10.2487	8.15598	13.8579	13.9173	42.547	14.6227	21.6894	12.9779	12.9534	19.2366	-	10	52729202	52733538	+	3194	protein_coding	hypothetical protein	Glyco_hydro_17
SORBI_3010G186600	12.8457	11.5112	7.03631	5.16417	10.5986	9.05089	10.9795	7.70372	9.40851	7.64378	8.30749	13.1476	13.9536	9.14241	12.467	10.0047	8.51447	23.1683	15.7784	13.2378	-	10	52717834	52725679	+	3793	protein_coding	hypothetical protein	-
SORBI_3010G186500	48.0151	6.81289	7.79866	43.7949	41.4505	18.2349	15.1206	9.52476	15.0144	23.6075	19.6968	28.836	29.2022	8.58581	25.559	28.3006	20.1367	23.1273	21.233	14.4527	-	10	52708369	52712438	-	2033	protein_coding	hypothetical protein	-
SORBI_3010G186400	3.31077	227.782	42.1286	12.5946	6.76008	38.7401	42.2233	49.812	102.163	9.8675	23.8049	44.0583	27.5347	192.999	200.427	232.975	206.441	1.07817	31.0661	9.8764	-	10	52706694	52708209	+	1428	protein_coding	hypothetical protein	-
SORBI_3010G186300	6.02958	5.81346	2.48176	40.5349	12.4723	3.84948	2.86809	1.91611	15.9919	9.23725	11.8914	8.15697	7.3995	3.40096	2.63579	8.6065	6.84252	4.01563	11.3922	9.51035	-	10	52686383	52693369	-	2094	protein_coding	SOS2 [Source:Projected from Arabidopsis thaliana (AT5G35410) UniProtKB/TrEMBL;Acc:A0A384KKJ4]	Pkinase
SORBI_3010G186200	13.7103	35.7548	20.989	40.4437	34.6871	35.7419	45.3338	51.947	17.3416	23.2839	36.4193	15.67	19.974	20.4327	162.516	127.19	43.1538	1.2147	8.83017	12.5231	-	10	52679609	52682635	+	2925	protein_coding	hypothetical protein	-
SORBI_3010G186100	6.32226	9.81046	4.01274	5.35469	5.93491	4.89094	7.12886	8.79327	6.45895	9.39887	11.6891	16.8607	17.8858	7.28536	4.97911	5.51475	6.8322	23.2378	13.8345	8.62929	-	10	52613154	52618423	-	2217	protein_coding	hypothetical protein	Myb_DNA-binding
SORBI_3010G186000	17.3525	40.1886	45.472	16.7543	29.8365	35.6748	29.5696	25.1874	32.4682	18.9511	19.9055	21.5976	27.8454	31.2039	23.6846	41.8338	31.3379	56.8522	45.7983	22.6741	-	10	52609828	52612503	+	1077	protein_coding	hypothetical protein	-
SORBI_3010G185900	0	0	0	0	0	0	0	0	0	0	0	0	0	0	0	0	0	0	0	0	-	10	52603786	52603890	-	105	protein_coding	hypothetical protein	-
SORBI_3010G185850	0	0	0.0701286	0	0.0263213	0	0	0	0	0.0339963	0	0	0	0	0	0.0336825	0	0	0	0	-	10	52600196	52601451	+	1256	protein_coding	hypothetical protein	-
SORBI_3010G185800	4.54735	4.25951	43.2073	34.2391	51.5539	33.5148	19.3521	3.92873	7.84957	14.7395	25.9449	5.23053	3.06899	12.0507	16.7503	51.3683	7.81637	0.0896539	10.998	14.334	-	10	52598482	52599967	+	1321	protein_coding	hypothetical protein	-
SORBI_3010G185700	7.19012	3.83544	145.946	16.717	6.00745	4.9482	3.32697	9.56881	5.73077	8.66314	4.06097	3.77884	5.39773	3.68042	6.05298	3.81323	4.19482	8.1108	6.88492	8.37774	-	10	52581277	52592358	+	6235	protein_coding	hypothetical protein	Mito_carr
SORBI_3010G185600	7.51201	8.12336	53.469	17.8951	13.7115	10.2	10.5497	13.681	14.7157	6.57464	7.46183	6.31001	2.99224	14.5904	18.444	11.0524	14.977	0.79409	2.82044	5.75388	-	10	52575331	52580150	+	4176	protein_coding	hypothetical protein	C2
SORBI_3010G185500	19.4848	29.8763	48.9157	31.3956	27.8615	19.2494	14.2888	17.1706	29.8975	15.7907	45.2664	89.8813	32.2039	15.0764	21.2655	27.0061	15.9918	60.1847	48.9957	54.9866	-	10	52559692	52569148	-	1590	protein_coding	hypothetical protein	-
SORBI_3010G185400	40.502	19.7087	24.5286	14.9489	25.5894	15.4047	19.3905	18.2739	16.7004	24.6816	17.4346	32.6158	35.7986	18.1091	22.6736	21.794	15.4593	56.0629	32.9672	25.6926	-	10	52549345	52558020	+	2704	protein_coding	hypothetical protein	-
SORBI_3010G185350	0.0464152	0	0	0.0330218	0.331055	0.0113819	0.0109907	0	0	0.0950194	0.214019	0.131316	0.231722	0	0	0.0117678	0	0.164719	0.116415	0.0544873	-	10	52521837	52525494	+	3595	protein_coding	hypothetical protein	-
SORBI_3010G185300	0.39139	0	0	1.34585	0.568655	1.91952	0	0	0	6.8773	33.1132	28.5885	10.1606	0	0	0	0	1.94456	14.4444	16.3363	-	10	52519876	52521350	-	1279	protein_coding	hypothetical protein	AP2
SORBI_3010G185250	1.01901	2.56064	0.672378	0.815588	2.52363	1.8741	1.08582	1.36496	4.21474	1.20601	4.96558	1.83459	1.44139	3.44658	1.0628	3.90758	2.56946	3.88749	0.365115	1.54513	-	10	52498799	52500108	+	1310	protein_coding	hypothetical protein	-
SORBI_3010G185200	18.5177	24.434	37.2055	11.958	13.5216	16.6112	16.6416	11.2017	32.1843	15.8791	24.4148	21.1578	14.6361	88.5036	21.2756	34.2458	31.0626	64.9471	16.5207	23.3278	-	10	52497832	52502154	-	1643	protein_coding	hypothetical protein	SPX
SORBI_3010G185100	1.05803	0.711767	0.454109	1.94162	1.49282	2.0368	1.46808	0.628016	2.23446	1.46506	2.45585	2.31939	3.189	1.15022	2.39558	4.25684	1.93267	3.93723	3.08238	3.02964	-	10	52490660	52496284	-	5625	protein_coding	hypothetical protein	RNA_pol_Rpc34
SORBI_3010G185000	0.130668	0	0	0	0	0	0	0.0683042	0	0	0.0182577	0.0224048	0	0.0607498	0.168731	0.0220857	0.0356198	0	0.0780313	0.0170436	-	10	52485614	52489444	-	3831	protein_coding	hypothetical protein	-
SORBI_3010G184900	0	0	0	0	0	0	0	0	0	0	0	0	0	0	0	0	0	0	0	0	-	10	52475909	52477549	+	1533	protein_coding	hypothetical protein	-
SORBI_3010G184800	81.7831	0	0.528621	0.534344	0.0248009	0.429744	0.118565	0.261739	0	0.0320325	0.26236	0	2.62473	0.139675	0.223813	0.0634736	0.136494	0.710775	0.358815	2.5471	-	10	52449718	52451697	-	1333	protein_coding	hypothetical protein	-
SORBI_3010G184600	14.1587	107.989	208.339	11.703	13.1926	30.2256	50.1833	65.8454	22.0958	27.2457	22.1501	20.2556	14.3246	58.1439	25.8859	23.395	27.5806	17.7529	15.9864	16.092	-	10	52420849	52425403	-	1481	protein_coding	hypothetical protein	-
SORBI_3010G184500	0.112026	0	0.0443512	0	0	0	0	0	0	0.0215002	0.0176096	0.497017	0.139819	0	0	0	0	0.119268	0.602091	0.164386	-	10	52417567	52419874	-	1986	protein_coding	hypothetical protein	ADH_zinc_N
SORBI_3010G184400	0.213721	0	0	0.741246	0	0	0	0	0	0.0410176	0.0671904	0.123678	0	0	0	0	0	0	0.172299	0	-	10	52416654	52417700	-	1041	protein_coding	hypothetical protein	Str_synth
SORBI_3010G184300	32.1928	22.7623	45.743	74.9459	20.1339	48.4606	38.0824	39.8518	53.5639	64.7684	18.942	21.3943	23.9977	47.6075	102.725	45.7013	59.3939	18.8389	17.1837	32.9058	-	10	52411252	52415468	+	2018	protein_coding	hypothetical protein	-
SORBI_3010G184201	0.175276	0.227327	0.277568	0.0623495	0.729255	0.386828	0.332031	0.320678	0.47152	1.0316	3.30623	1.26224	1.22506	0.880081	0.522309	1.02208	1.05116	1.74166	1.75846	0.754447	-	10	52404703	52406075	+	952	protein_coding	hypothetical protein	-
SORBI_3010G184100	15.6472	49.0384	49.4805	24.421	17.2927	26.0615	28.8652	31.3625	32.1028	14.6773	16.833	31.7298	39.3024	32.4087	38.7736	25.3459	30.6709	72.4132	43.9406	30.6236	-	10	52392383	52396386	-	2275	protein_coding	hypothetical protein	Mito_carr
SORBI_3010G184000	66.4152	46.9581	34.188	32.3182	41.9111	31.9107	33.0152	31.9745	40.0489	32.4945	41.6655	77.3496	48.1013	30.4037	39.1804	35.1213	30.6513	64.2708	60.5396	47.2839	-	10	52387417	52389679	+	1113	protein_coding	hypothetical protein	-
SORBI_3010G183900	1.54502	1.00192	0	3.84719	10.0403	3.03095	0.512189	0.323054	2.07818	4.19086	8.22504	2.94056	2.7768	0.0861973	0.276243	1.56686	1.17928	0.87728	6.42163	2.53921	-	10	52348521	52349875	-	540	protein_coding	hypothetical protein	-
SORBI_3010G183800	0.933497	0	0	0	0.616495	0	0	0	0	8.71903	13.5325	12.5448	6.03259	0	0	0	0	0	4.40393	2.89181	-	10	52329644	52334866	+	2145	protein_coding	hypothetical protein	DEAD
SORBI_3010G183700	0.114682	0	0	0.0203975	0.0113607	0	0.0407337	0.0299741	0	0.366833	0.132199	0.0589915	0.0763382	0.0479861	0.0170872	0	0	0	0	0	-	10	52321025	52324660	+	2910	protein_coding	hypothetical protein	-
SORBI_3010G183600	0.480765	2.26632	29.4581	1.10504	0.0659433	5.0059	9.56267	11.831	0	2.75388	0.418555	1.25553	3.50793	9.90352	1.85142	0.703211	9.557	11.4968	2.58391	3.90722	-	10	52317082	52320675	+	1504	protein_coding	hypothetical protein	bZIP_1
SORBI_3010G183500	19.2352	4.63155	36.5006	16.3812	2.95677	22.0796	13.4118	13.3177	4.62652	6.2376	6.89622	5.17262	5.32181	10.5067	41.1683	9.90964	18.2488	1.21056	10.3381	15.9342	-	10	52309606	52311953	+	2348	protein_coding	hypothetical protein	-
SORBI_3010G183400	4.53873	111.373	18.9182	7.67662	11.1217	9.54433	26.402	33.2044	20.4228	10.0914	16.1267	9.25063	12.7831	46.3315	19.79	20.257	27.9082	17.6874	17.2137	14.4763	-	10	52306094	52308047	+	1299	protein_coding	OCP3 [Source:Projected from Arabidopsis thaliana (AT5G11270) UniProtKB/TrEMBL;Acc:A0A178UCN6]	Homeobox
SORBI_3010G183350	0.101963	0.495911	0.322939	0.598463	2.33326	0.525068	0.507025	1.43908	1.02861	0.626205	0.641111	0.511377	0.610846	0.853282	0.0911527	0.11633	0.458617	0.434218	0.328804	1.4962	-	10	52302452	52303628	+	1091	protein_coding	hypothetical protein	-
SORBI_3010G183300	0.739148	2.42659	3.36524	1.08459	3.00666	1.8012	3.4622	4.05695	1.86415	1.7555	2.52709	1.92482	2.44469	2.12629	2.06494	1.35278	1.54896	4.22974	4.79195	3.19962	-	10	52301694	52305871	-	2408	protein_coding	hypothetical protein	-
SORBI_3010G183201	28.6284	34.7432	56.2743	71.3832	2.863	42.1881	11.8793	11.9007	10.2686	4.53506	22.4008	5.60997	16.2434	17.0366	27.2993	6.70523	16.8716	44.3156	10.3554	22.9383	-	10	52298347	52300104	-	612	protein_coding	hypothetical protein	-
SORBI_3010G183100	1.54794	2.20329	6.39838	3.40648	3.99729	2.66352	2.34212	2.18747	3.0561	6.6466	3.71721	2.10533	2.20922	2.4737	2.05619	3.25271	3.54022	1.24764	2.50055	3.58296	-	10	52287394	52293997	-	6360	protein_coding	hypothetical protein	Agenet
SORBI_3010G183032	0.108072	0.280331	0.0570476	0.0768869	0.214116	0	0.0767714	0.0282463	0.0872189	0.49779	0.317109	0.222364	0.32372	0	0.0644091	0.191798	0	0.230116	1.2004	0.422889	-	10	52285960	52287598	-	1544	protein_coding	hypothetical protein	-
SORBI_3010G182966	18.6216	1.9467	25.7017	4.84438	0.261111	1.36452	0.901539	0.574097	1.45755	0.618288	3.88243	1.86429	5.8241	1.06205	2.33455	0.278446	2.35516	0.727538	1.39041	6.64687	-	10	52276403	52279090	+	2279	protein_coding	hypothetical protein	p450
SORBI_3010G182900	0	0	0	0	0	0	0	0	0	0.850585	0	0	0	0	0	0	0	0	0	0	-	10	52244471	52245210	-	502	protein_coding	hypothetical protein	Ras
SORBI_3010G182800	1.03246	11.6456	7.65321	1.43	0	0.937295	5.58657	13.5212	1.59557	0.927514	2.01659	0.728831	1.00895	26.472	29.8893	12.6314	32.9292	0	0.755609	1.62461	-	10	52236033	52242284	-	2532	protein_coding	hypothetical protein	Pkinase
SORBI_3010G182700	1.43807	10.5139	39.0821	85.4459	0.551452	8.088	17.3337	7.20202	17.1094	11.2535	3.23766	180.793	61.7891	4.11504	5.80595	21.77	6.22167	56.8952	97.9838	136.959	-	10	52232063	52234640	+	1199	protein_coding	hypothetical protein	Ras
SORBI_3010G182600	654.093	221.39	100.806	295.692	192.279	312.848	264.365	223.625	253.869	147.437	170.008	499.874	343.761	229.571	428.072	337.235	232.007	538.081	392.781	276.562	-	10	52224553	52228422	+	2665	protein_coding	hypothetical protein	GTP_EFTU
SORBI_3010G182500	0	0	0.151083	0	0	0.0701849	0.0338865	0.149613	0.230988	0.366204	0	0.0368064	0.190518	0.0399198	0.170579	0.145129	0.54615	0	0.153827	0.559983	-	10	52211183	52215181	+	1166	protein_coding	hypothetical protein	Ras
SORBI_3010G182300	411.624	89.4772	45.2123	121.16	119.195	83.7212	103.598	106.718	75.5152	61.5133	71.0328	342.06	223.205	108.213	182.575	114.124	101.539	414.67	225.329	127.188	-	10	52198685	52202156	+	2669	protein_coding	hypothetical protein	GTP_EFTU
SORBI_3010G182200	355.285	129.962	63.6945	143.777	126.214	104.37	121.822	122.129	92.4834	85.7365	105.338	292.301	219.751	126.13	166.194	128.243	110.577	388.573	235.97	152.869	-	10	52135657	52140467	+	3666	protein_coding	hypothetical protein	GTP_EFTU
SORBI_3010G182100	591.313	227.634	86.0805	245.297	196.282	214.544	222.039	184.321	155.562	142.261	156.806	579.237	392.308	220.87	284.233	262.411	210.335	618.532	393.324	231.024	-	10	52122844	52125920	+	2421	protein_coding	hypothetical protein	GTP_EFTU
SORBI_3010G182000	4.08706	0.687509	0.291983	0.196763	1.75343	1.379	1.04782	0.722855	0.620009	3.42067	3.30404	5.35861	3.74331	0.925787	1.40106	0.934921	1.38219	5.36547	2.44435	1.1183	-	10	52111939	52115686	+	1810	protein_coding	hypothetical protein	AAA
SORBI_3010G181900	0	0	0	0	0	0	0	0	0	0	0.29623	2.35216	4.20602	0	0	0	0	9.5596	2.5619	2.30985	-	10	52107407	52109437	+	2007	protein_coding	hypothetical protein	-
SORBI_3010G181800	2.00694	0	0	0.40795	0	0	0	0	0.0771283	0	0.781175	2.0647	2.29015	0	0	0	0	9.97115	0.205456	1.34627	-	10	52100959	52101571	+	582	protein_coding	hypothetical protein	-
SORBI_3010G181701	0.262363	0.382811	0	0.606633	1.61139	0.707697	0.652316	0.891445	0.670507	6.1095	1.51218	0.978438	0.480264	0.219559	0.430001	0.964505	0.679436	0	0.282017	0.718645	-	10	52091020	52092370	+	1272	protein_coding	hypothetical protein	-
SORBI_3010G181600	72.8856	30.529	35.7963	49.1315	44.2734	55.0808	53.4409	46.3802	56.3562	136.57	35.0845	70.3827	82.7857	48.7808	79.7437	72.2685	59.7995	129.992	105.545	86.9194	-	10	52075764	52084556	-	1875	protein_coding	hypothetical protein	-
SORBI_3010G181500	30.6994	0.0463219	0.226237	4.77699	20.7943	10.6849	0.473599	0.759231	1.22983	3.32675	12.8552	15.7997	13.5987	0.318812	5.70461	0.386349	0.10385	19.2656	9.70866	5.44117	-	10	52071725	52075228	+	3504	protein_coding	hypothetical protein	-
SORBI_3010G181300	1.56426	84.6855	191.189	3.28391	3.20079	2.98064	3.49758	3.73992	2.52486	2.04736	2.61206	1.89948	1.38264	17.3611	2.56757	1.7359	4.88628	1.20126	1.24041	0.963305	-	10	52054003	52058049	+	2169	protein_coding	hypothetical protein	-
SORBI_3010G181200	2.17821	1.24526	1.54317	0.815619	5.30361	2.23495	2.42961	2.35215	2.43642	2.87498	2.583	1.68068	2.13674	2.30254	3.68957	2.22353	2.07822	0.650954	2.09493	1.70469	-	10	52051092	52054002	+	2911	protein_coding	hypothetical protein	FAR1
SORBI_3010G181150	0	0	0	0	0	0	0	0	0.0204971	0	0	0	0	0	0.0227049	0.00965871	0	0	0	0	-	10	52044511	52049206	+	4380	protein_coding	hypothetical protein	-
SORBI_3010G181100	1.28827	0.814535	5.10026	2.8527	0.823139	1.89544	1.57864	1.84348	2.59923	1.48347	1.09353	0.546704	0.610993	1.50933	1.58356	0.955357	1.13255	0.274309	0.51929	1.17204	-	10	52039617	52041596	+	1727	protein_coding	hypothetical protein	FAD_binding_3
SORBI_3010G181000	0.200995	0.462123	0.202553	0.487489	0.749379	0.416705	0.649009	0.68771	0.147466	0.85567	0.58594	0.451157	0.364889	0.36699	0.702406	0.236264	0.702321	0.038907	0.274976	0.257401	-	10	52036823	52039866	-	3044	protein_coding	Pentatricopeptide repeat-containing protein At1g31430 [Source:Projected from Arabidopsis thaliana (AT1G31430) UniProtKB/Swiss-Prot;Acc:Q9C866]	PPR
SORBI_3010G180800	4.21973	1.25979	9.34695	4.77504	21.0617	0.605235	1.12363	2.57204	4.81914	2.69341	0.704191	0.413641	1.19774	0.786214	0.692783	2.06701	1.05914	0.802437	1.2495	2.18706	-	10	52023606	52037400	+	10479	protein_coding	hypothetical protein	Piwi
SORBI_3010G180750	0	0	0	0	0	0	0	0	0	0	0	0	0	0	0	0	0	0	0	0	-	10	52025641	52027525	+	1885	protein_coding	hypothetical protein	-
SORBI_3010G180700	12.0162	17.8728	83.9173	7.99237	11.6529	6.587	10.9479	29.7534	9.29472	15.0253	22.4151	26.8131	13.2941	21.4487	11.992	12.7852	12.1134	16.7266	17.0311	14.614	-	10	52008476	52012850	+	1671	protein_coding	Probable protein phosphatase 2C 22 [Source:Projected from Arabidopsis thaliana (AT2G25620) UniProtKB/Swiss-Prot;Acc:Q9SLA1]	PP2C
SORBI_3010G180600	59.7858	15.7634	24.164	75.5192	2.18297	24.7902	21.8942	15.052	12.7118	3.54617	6.59456	5.28785	3.25126	11.6604	27.8575	22.3189	20.9938	0	1.62798	4.267	-	10	51986881	51988716	+	1469	protein_coding	hypothetical protein	-
SORBI_3010G180550	0	0	0.374815	0.252582	0	0.0435295	0.168135	0	0	0	0	0	0	0.0990352	0.0528977	0	0.0483899	0	0	0	-	10	51985908	51986860	+	940	protein_coding	hypothetical protein	-
SORBI_3010G180500	0.064376	0.250481	0.203892	0	0	0	0.0914623	0	0	0.0494205	0.32382	0.0496716	0	0	0	0	0.0526464	0.27415	0	0	-	10	51977964	51980506	+	864	protein_coding	hypothetical protein	-
SORBI_3010G180400	93.435	16.8734	121.001	51.5848	11.3092	30.5559	21.0776	25.9163	39.8831	22.1944	30.1544	35.3365	32.3827	34.9099	146.202	33.5093	117.872	22.2381	29.5067	36.264	-	10	51971877	51976462	+	2780	protein_coding	hypothetical protein	-
SORBI_3010G180350	0	0	0.228783	0	0	0	0.0342093	0.0377595	0	0	0.0302793	0	0.144249	0.0806001	0.172204	0	0.0393822	0.205079	0	0.282658	-	10	51939697	51940851	+	1155	protein_coding	hypothetical protein	-
SORBI_3010G180300	0	0	0	0	0.331923	0.164328	0.396704	0.0875748	0.180276	0	0.0702261	0.0861773	0.223036	0	0	0	0	0	0.600277	0.131112	-	10	51929624	51930438	+	498	protein_coding	hypothetical protein	-
SORBI_3010G180200	0.5147	0.306858	0.236637	0.637863	7.47047	1.13593	1.02612	0.611873	2.45213	3.9003	4.84397	3.53579	7.72531	0.611357	0.756989	0.517765	0.773949	11.8433	7.87055	8.2056	-	10	51925652	51933250	-	3350	protein_coding	hypothetical protein	-
SORBI_3010G180100	13.6699	0.312138	0.745305	40.4082	1.79284	8.1206	0.805431	0.369027	8.14902	8.73694	6.76585	4.95188	10.0392	1.10996	3.74841	0.569493	1.31211	1.68539	6.46166	13.2597	-	10	51922418	51925126	+	2600	protein_coding	hypothetical protein	-
SORBI_3010G180000	0.15481	0	0	0.236011	0.0262899	0	0	0	0.0178484	1.71477	0.0417168	0.0170641	0.772867	0	0	0	0	0.517997	0.404131	0.259618	-	10	51871149	51873663	-	2515	protein_coding	hypothetical protein	-
SORBI_3010G179900	13.675	0	0	0.14449	0.0321904	0.139447	0	0	0.0437085	2.07884	0	0	0	0	0	0	0	0	0	0	-	10	51809595	51812223	-	2054	protein_coding	hypothetical protein	-
SORBI_3010G179850	0	0	0.166192	0	0	0	0	0	0	0.0402824	0.032993	0	0.0523925	0.351295	0	0	0	0	0	0	-	10	51791936	51792995	+	1060	protein_coding	hypothetical protein	-
SORBI_3010G179800	11.6487	44.5886	148.624	7.36285	4.07276	26.2472	15.2911	13.784	0.152553	1.88646	6.64093	42.26	1.72223	174.599	4.92168	4.72653	27.8832	0.352179	2.69222	1.3314	-	10	51789536	51791889	+	2354	protein_coding	hypothetical protein	Kelch_1
SORBI_3010G179750	0.239229	0.290881	0.947113	0.127649	0	0	0.212428	0.140685	0.144802	0	0.0376049	0.0922931	0	0.850851	0.106933	0.181958	0.0978203	0	0	0.0702086	-	10	51782965	51783894	+	930	protein_coding	hypothetical protein	-
SORBI_3010G179700	29.6944	16.9293	27.3242	35.263	31.9398	24.9246	22.0926	25.1122	22.6374	30.9915	27.1132	27.2726	18.1537	28.3283	25.156	31.1375	22.0096	8.97797	20.3792	19.9743	-	10	51775520	51782409	+	1860	protein_coding	hypothetical protein	-
SORBI_3010G179600	0	0	0	0	0	0	0	0	0	0.925003	0.0733178	0.0299904	0.426902	0	0	0	0	0.165525	0	0.0456282	-	10	51772296	51775278	+	1431	protein_coding	hypothetical protein	-
SORBI_3010G179500	1.58917	6.22011	4.07452	2.14007	0.607216	2.05981	1.45145	2.75914	0.732876	0.697132	0.618563	0.175169	0.0377796	5.06629	4.26204	3.39592	1.5781	0	0.162687	0.488595	-	10	51766305	51767774	-	1470	protein_coding	hypothetical protein	UDPGT
SORBI_3010G179400	17.1442	0.0271606	0.0442176	15.0478	0.099577	1.33517	0.0595056	0.0437874	0.225345	0.407273	5.46008	6.11859	1.2267	0.0233667	2.52114	2.46355	0.0456691	0	0.570263	0.721118	-	10	51743898	51745889	-	1992	protein_coding	hypothetical protein	UDPGT
SORBI_3010G179300	0.408704	7.37288	12.1796	0.872309	2.7384	0.0546664	2.98251	3.29204	0.899573	3.73655	4.71908	1.06072	22.4073	17.35	0.265725	0.763019	3.12966	0.870248	50.4021	65.7738	-	10	51712829	51714325	+	1497	protein_coding	hypothetical protein	-
SORBI_3010G179150	0.46406	0.386917	1.71474	0.30657	0.394035	0.341388	0.83199	0.41585	0.160508	0.203573	0.48631	0.0511517	0.0882575	2.23764	0.0790207	0.117654	2.6204	0	0.0712605	0.363177	-	10	51706408	51711410	-	2517	protein_coding	hypothetical protein	UDPGT
SORBI_3010G179000	0.468297	0.124234	0.269672	0.477034	0.101216	0.266208	0.423394	0.116833	0.034358	0.14707	0.133841	0.0821207	0.0425075	0.374082	0.0761176	0	0.15667	0	0.0686425	0.0999525	-	10	51703141	51705753	+	2613	protein_coding	hypothetical protein	UDPGT
SORBI_3010G178900	0.140103	0.389377	0.285259	0.149513	0.118962	0.220859	0.0853077	0.031387	0	0	0.0125846	0.0154431	0.0199842	0	0.357854	0.0304463	0.0818396	0.0852342	0.10757	0.187964	-	10	51699344	51702122	-	2779	protein_coding	hypothetical protein	UDPGT
SORBI_3010G178800	55.705	69.1995	313.796	83.914	22.1342	55.7407	43.5586	46.8909	21.8102	37.3565	22.6916	20.3538	47.8585	75.2213	90.8174	35.7097	72.1312	127.814	77.8566	43.3536	-	10	51683062	51687453	+	1982	protein_coding	hypothetical protein	-
SORBI_3010G178700	3.7878	2.52097	8.38872	6.26087	5.12905	13.6602	7.93066	3.05933	4.91868	1.57417	7.01959	3.27421	3.66828	6.48267	12.8829	6.3252	8.22157	1.15219	1.53066	2.64118	-	10	51681001	51683061	+	1953	protein_coding	hypothetical protein	-
SORBI_3010G178600	87.281	6.06647	7.41329	65.0919	21.8017	11.7588	10.9062	12.6055	4.05141	36.7768	22.1435	20.9948	18.2353	13.0799	9.08574	8.73745	11.5983	14.3615	10.8915	10.9366	-	10	51655151	51678285	+	3612	protein_coding	hypothetical protein	Coatomer_WDAD
SORBI_3010G178500	0.16216	0.105158	4.27996	1.03831	0.481918	0.477175	0.191991	0.211916	0.261742	0	0.883661	26.8592	1.45721	0.0452347	7.82824	0.698919	0.397841	2.3019	23.0667	21.7012	-	10	51650863	51651891	-	1029	protein_coding	MBF1C [Source:Projected from Arabidopsis thaliana (AT3G24500) UniProtKB/TrEMBL;Acc:A0A178VDH9]	HTH_3
SORBI_3010G178401	0	0.655238	0.15239	0	0	0	0.0683593	2.1127	0	0	0	0	0	2.01326	0	0	0.472178	0	0	0	-	10	51646547	51648527	+	578	protein_coding	hypothetical protein	-
SORBI_3010G178300	12.6458	0.0250018	0	2.85263	6.84412	0.170176	0.0182586	0	0	0.295975	2.82819	1.96336	0.949553	0	0.183822	0	0	0.164186	1.4643	2.08193	-	10	51625698	51631645	+	2164	protein_coding	hypothetical protein	Aldedh
SORBI_3010G178200	29.8912	56.8026	90.5617	52.8623	10.2929	14.2537	28.8311	37.2967	20.9095	16.9355	28.8953	57.6591	30.3817	52.0138	28.1221	29.2699	36.7039	36.4922	45.5502	34.7219	-	10	51619514	51622293	-	1243	protein_coding	hypothetical protein	-
SORBI_3010G178100	0.0390322	0.0379677	0	0	0	0	0.138638	0.0918153	0	0.0299645	0.392675	0.0301167	0	0.0653285	0.0348939	0	0.574566	0	0	0	-	10	51617033	51618457	+	1425	protein_coding	hypothetical protein	UDPGT
SORBI_3010G178050	0	0	0	0	0	0	0.277275	0	0	0	0	0	0	0	0	0	0.638406	0	0	0	-	10	51616689	51616973	-	285	protein_coding	hypothetical protein	-
SORBI_3010G178000	0	173.953	229.758	1.57028	0	0.0721654	60.2083	348.821	0	15.0615	5.36617	0	0	673.078	22.2749	1.26841	193.658	0	0	0	-	10	51603657	51604401	+	567	protein_coding	hypothetical protein	-
SORBI_3010G177900	0.112898	0.219637	0.23838	0.0401601	0.0671033	0.415268	0.66833	0.649167	0.273341	3.61124	2.08227	0.754955	0.225451	1.07076	0.571925	0.0858698	1.81577	0.881435	0.687679	0.618482	-	10	51600638	51602870	+	1478	protein_coding	hypothetical protein	-
SORBI_3010G177800	0.606773	412.042	1945.05	0.359738	0	5.35651	271.409	1016.14	0.108821	20.8062	0.296737	0	0	1857.18	290.387	0.307674	735.833	0	0	0	-	10	51567424	51568369	+	825	protein_coding	hypothetical protein	-
SORBI_3010G177600	0	0	0	0	0	0	0	0	0	83.9597	0.0812844	0	0	0	0	0	0	0	0.31266	0.0379396	-	10	51547535	51549353	-	1721	protein_coding	hypothetical protein	Glyco_hydro_17
SORBI_3010G177500	0	0.101891	0	0	0	0	0.0248033	0	0	30.8786	0	0	0	0	0	0	0	0	0	0.0819761	-	10	51538507	51540213	-	1593	protein_coding	hypothetical protein	SNARE
SORBI_3010G177400	0.215919	15.2902	20.8578	3.41024	7.21253	7.6562	10.0006	9.85339	4.42613	11.9015	10.0465	12.4617	12.7198	13.9856	3.51309	3.08749	11.5482	21.7924	14.7612	12.0652	-	10	51531281	51534517	+	1288	protein_coding	hypothetical protein	adh_short
SORBI_3010G177300	7.72623	0.598121	0.0423367	0.39942	3.24954	1.56355	0.113949	0.26203	0.453094	0.9133	0.706008	0.990138	3.5369	0.0671183	0.10755	0.0101671	0.0109316	2.67548	2.2415	2.44794	-	10	51512878	51517492	-	4161	protein_coding	hypothetical protein	Pkinase
SORBI_3010G177200	0.048282	0	0.191149	0.412199	0.34437	1.86474	0.806011	0.17036	0.954664	70.7579	3.52155	3.59499	4.29054	0.383847	2.28764	0.716103	0.789696	1.79911	5.138	5.41283	-	10	51498384	51501899	-	2304	protein_coding	Polyadenylate-binding protein 3 [Source:Projected from Arabidopsis thaliana (AT1G22760) UniProtKB/Swiss-Prot;Acc:O64380]	RRM_1
SORBI_3010G177100	21.5073	1.08704	5.21597	6.67423	17.4678	15.5623	1.23953	5.16522	7.19928	4.2594	7.16217	12.6767	16.8742	5.10256	6.88807	0.357887	2.38896	31.8103	8.05036	17.6526	-	10	51493336	51498206	+	2837	protein_coding	hypothetical protein	Pkinase_Tyr
SORBI_3010G177000	1.16687	0.546504	1.23191	0.968524	2.59442	6.07249	1.68853	1.18604	3.80176	0.962145	0.65217	0.900342	2.24388	2.56783	0.849979	0.624552	2.08524	1.74843	1.62593	2.13081	-	10	51488273	51489559	-	1287	protein_coding	hypothetical protein	-
SORBI_3010G176900	12.8236	0	0.423809	106.956	25.8352	1.95237	0.190112	0.139895	2.12384	4.58838	6.49251	12.2348	8.21684	0.0373268	0.179436	0.474958	0.0182384	13.0115	13.5445	8.45628	-	10	51480370	51483284	+	2494	protein_coding	hypothetical protein	-
SORBI_3010G176800	3.73396	0.0493049	0	0.126214	7.20039	0.584185	0.0240047	0.0927356	0.0818141	1.34895	1.65727	0.482352	0.38801	0.325204	0.256775	0.0642545	0.124355	0	0.181615	0.119005	-	10	51466505	51476211	-	3292	protein_coding	hypothetical protein	ABC_tran
SORBI_3010G176700	0.269641	0.247715	0.687952	0.399655	0.124652	0.0330604	0.212829	6.31925	0.060448	0.666998	0.0941896	0.300518	0.553416	3.9238	3.7631	0.056969	4.0672	0	0.177125	0.0527557	-	10	51459524	51463338	+	3713	protein_coding	hypothetical protein	Pkinase
SORBI_3010G176600	4.05238	4.40561	9.43731	4.66374	0.283368	10.1125	17.1029	81.8041	1.85967	8.17388	18.8352	10.116	7.77505	84.7147	103.71	2.71962	236.335	0.33838	0.170822	1.95882	-	10	51454614	51455455	-	700	protein_coding	hypothetical protein	-
SORBI_3010G176550	9.69932	50.138	45.8078	22.9	24.9987	35.8978	36.341	64.8463	39.0351	26.1929	30.4121	13.4113	14.8268	30.205	5.67833	28.0729	31.9739	8.40727	14.5778	16.6762	-	10	51450411	51452224	+	1296	protein_coding	hypothetical protein	-
SORBI_3010G176500	15.0223	7.57936	6.96971	10.9991	10.704	12.1415	13.2237	13.2404	12.7218	9.3087	9.16319	10.3089	16.0756	14.5258	25.434	16.1398	17.8494	19.2208	16.0753	13.6809	-	10	51439969	51442445	+	2477	protein_coding	hypothetical protein	-
SORBI_3010G176400	0	0	0.133188	0.0299177	0	0	0	0	0	202.886	0.0176273	0	0	0	0	0	0	0	0	0	-	10	51434306	51436406	+	1984	protein_coding	hypothetical protein	-
SORBI_3010G176300	19.2552	25.6914	14.4711	7.11484	9.85136	5.60776	10.4161	13.5077	2.87844	10.2185	6.74241	7.30261	8.12325	23.5074	18.1515	9.48586	22.8957	11.0193	8.74513	7.00556	-	10	51421688	51430413	-	2386	protein_coding	Class-I type histone deacetylase, Seedling root growt [Source: Projected from Oryza sativa (Os06g0583400)]	Hist_deacetyl
SORBI_3010G176200	1.66654	54.5497	182.893	19.2965	12.1095	8.15291	18.4388	9.63716	9.44848	11.6744	15.0107	5.78647	6.2816	43.8618	9.68403	8.77793	27.7007	4.87926	12.3158	6.01585	-	10	51410500	51418471	+	1335	protein_coding	hypothetical protein	-
SORBI_3010G176101	0	0	0	0	0	0	0	0	0	0	0	0	0	0	0	0	0	0	0	0	-	10	51378544	51380527	-	1926	protein_coding	hypothetical protein	-
SORBI_3010G176000	1.42796	0.406542	4.3572	0.483179	0.020701	0.0512433	0.148447	0.300397	0.0562162	1.52402	0.109495	0.161238	0.104326	1.02012	0.373629	0.0794712	0.655096	0.0741596	0.112312	0.122656	-	10	51338335	51341295	+	1597	protein_coding	hypothetical protein	-
SORBI_3010G175900	4.84298	4.83326	21.1489	3.85942	0.124612	0.709468	2.98609	3.18914	0.676799	7.47601	1.25891	8.08826	7.55692	6.04421	2.35218	1.76205	3.11187	4.33019	9.45379	4.71308	-	10	51332954	51345317	-	5306	protein_coding	hypothetical protein	-
SORBI_3010G175800	99.1624	0	0.222428	0.149891	0.918321	0.103328	0.199554	0	0	2.91132	3.09101	4.71429	19.7742	0.64648	0.125565	0	0	47.8517	59.6366	99.8372	-	10	51300749	51301540	-	792	protein_coding	hypothetical protein	-
SORBI_3010G175700	0	0	0	0	0	0	0	0	0	0	0	0	0.480831	0	0	0	0	0.512696	0	5.3705	-	10	51282901	51284669	+	231	protein_coding	hypothetical protein	-
SORBI_3010G175550	0	0	0	0	0	0	0	0	0	0	0	0	0	0	0	0	0	0	0	0	-	10	51193509	51194177	-	669	protein_coding	hypothetical protein	-
SORBI_3010G175500	202.331	254.968	540.616	336.355	173.283	387.236	361.618	342.999	315.305	195.344	72.8173	44.7822	67.4749	316.494	717.632	367.564	250.945	10.8706	52.5669	65.4517	-	10	51186714	51187127	+	414	protein_coding	hypothetical protein	-
SORBI_3010G175400	47.857	68.6286	132.795	81.5005	35.8886	119.121	82.4136	76.6792	76.7854	48.2411	27.939	11.2963	13.8144	76.386	185.303	80.5129	84.4682	3.36028	13.8909	15.892	-	10	51187136	51195911	+	8776	protein_coding	hypothetical protein	-
SORBI_3010G175350	0.121655	0	0	0.0778959	0.289235	0.143194	0.190126	0	0.274909	0.691109	0.367166	0.225282	0.194352	0.101808	0.587289	0.111037	0.0596935	0	0.706153	0.457001	-	10	51150356	51153341	+	2286	protein_coding	hypothetical protein	-
SORBI_3010G175200	0.656589	0.129901	0.281974	1.29449	0	0.327473	0.0395275	0.0872594	0.0179627	0.0256299	0.10496	0.0515202	0	0.633286	1.42267	0.0423221	0.646166	0	0	0	-	10	51128252	51133249	+	4998	protein_coding	hypothetical protein	-
SORBI_3010G175100	0.535889	2.54121	0.212159	4.33678	2.00401	2.56249	4.20337	2.6437	5.35204	1.93698	1.74091	0.447942	0.512778	0.803493	2.45525	2.80223	0.712153	0	0.50403	1.36302	-	10	51082128	51084618	+	2491	protein_coding	hypothetical protein	Pkinase
SORBI_3010G175000	1.25736	1.02293	0.0362029	2.39086	7.33751	4.42309	2.82574	1.29062	5.60878	2.45701	3.63669	1.65809	2.10001	1.10962	4.57794	3.54717	1.34609	0	2.55566	4.3744	-	10	51084585	51088673	-	2433	protein_coding	hypothetical protein	-
SORBI_3010G174900	4.86657	0.0197244	0.0642228	5.66951	2.68767	6.68289	1.39724	0.0476984	3.55116	1.18307	4.98516	1.4707	0.749119	0.475138	19.3058	10.4876	2.71957	0	0.283354	0.571293	-	10	51076575	51079425	+	2743	protein_coding	hypothetical protein	Pkinase
SORBI_3010G174800	11.3866	7.68337	12.7223	11.1143	9.21958	17.0471	11.6901	10.8967	11.6557	11.5432	8.39179	10.9853	11.8166	9.57859	13.4373	15.1283	10.5747	19.0835	16.0118	13.6077	-	10	51058772	51074555	+	10302	protein_coding	hypothetical protein	Metallophos
SORBI_3010G174700	5.99099	6.83986	4.82069	3.89207	9.13343	7.34073	7.11611	5.46011	7.3624	4.79332	5.79717	10.0481	9.28352	8.54587	14.1981	10.2157	6.58556	7.86929	6.53388	6.50771	-	10	51040704	51051737	-	5719	protein_coding	hypothetical protein	-
SORBI_3010G174600	0	0	0	0.682261	0	0.156773	0	0	0.171987	0	0	0	0	0	0	0	0	0	0	0	-	10	51040305	51040580	-	261	protein_coding	hypothetical protein	LRRNT_2
SORBI_3010G174550	0	0	0	0	0	0.0643361	0	0	0.0705797	0.167843	0.109977	0.0674785	0	0.0365932	0	0.0332588	0	0	0	0	-	10	51034281	51040234	-	1272	protein_coding	hypothetical protein	-
SORBI_3010G174500	30.3798	36.2353	91.8542	45.5733	3.62777	19.8723	38.0151	33.6548	19.465	10.263	14.4966	9.02382	7.17545	43.8938	87.1795	28.9023	47.4025	2.8927	3.02642	6.12492	-	10	51011401	51016873	-	2825	protein_coding	hypothetical protein	Pkinase
SORBI_3010G174400	4.83526	51.1081	35.5545	10.7473	13.1616	22.0902	25.2035	18.377	33.0824	14.7769	16.7698	11.9529	4.70488	20.6702	17.1528	11.8998	11.3338	0	6.38926	4.77232	-	10	51006670	51011173	+	1806	protein_coding	hypothetical protein	-
SORBI_3010G174300	3.04393	2.58706	0.99816	1.13201	0	2.64642	1.24498	0.554495	0.446653	1.10938	7.69436	0.984536	1.24334	4.03969	6.18455	0.596341	4.04827	0	0.0495751	0.324846	-	10	50983246	50987163	+	3618	protein_coding	hypothetical protein	-
SORBI_3010G174100	0.613578	0	0.072875	0	0	0	0	0	0	0	0	0	0	0	0	0	0	0	0	0	-	10	50943821	50947446	+	3626	protein_coding	hypothetical protein	-
SORBI_3010G174000	0.481983	0.328187	0.0763272	0.514356	0.572956	0.248201	0.582061	0.415715	0.0777967	0	0.303055	0.111568	0.0962496	0.32268	0.215441	0.219958	0.315331	0	0.103618	0.565806	-	10	50939724	50941078	-	1154	protein_coding	hypothetical protein	2OG-FeII_Oxy
SORBI_3010G173900	0.505032	1.40827	0.85309	0.646744	1.3608	0.421067	0.908865	1.08239	0.597791	0.956341	0.613926	1.3249	0.672349	1.40879	0.632082	0.588994	0.770957	0.501834	1.01335	0.790484	-	10	50937952	50939603	+	1652	protein_coding	hypothetical protein	-
SORBI_3010G173800	60.8558	2.52932	0.272698	18.2848	0.276349	209.707	12.771	4.68528	5.67015	23.174	98.194	22.9197	15.9731	0.187339	48.677	22.0956	2.47852	0.0366665	8.77378	22.7821	-	10	50930628	50935313	+	3230	protein_coding	hypothetical protein	-
SORBI_3010G173700	9.39053	0.429396	0.127102	15.6743	5.74845	14.9382	0.99777	0.50346	3.72453	7.3014	49.1534	10.4349	9.05566	0.235083	7.03165	5.79941	0.164093	6.66505	7.54894	6.68957	-	10	50913668	50915961	-	1386	protein_coding	hypothetical protein	Tetraspannin
SORBI_3010G173600	0	0	0	0	0	0	0	0	0	0	0	0	0	0	0	0	0	0	0	0	-	10	50881171	50883589	-	2252	protein_coding	hypothetical protein	FAD_binding_4
SORBI_3010G173550	0	0	0	0	0	0	0.0362992	0	0	0.0392277	0	0	0	0	0	0.00971639	0.0835764	0	0	0	-	10	50867811	50875946	-	4354	protein_coding	hypothetical protein	-
SORBI_3010G173500	0	0	0	0	0	0	0	0	0	0	0	0	0	0	0	0	0	0	0	0	-	10	50868252	50868972	+	721	protein_coding	hypothetical protein	-
SORBI_3010G173400	0.101239	1.71352	1.37878	0.0216078	0.0120348	0	4.89042	10.9388	0.147069	0.341968	0.0381936	0.0468689	0.0808679	38.3793	0	0.0154005	9.48808	0.0431135	0.261176	0.451615	-	10	50865039	50868077	+	2747	protein_coding	hypothetical protein	GATA
SORBI_3010G173300	0.456979	0.560937	0.396298	0.499284	1.30634	0.600319	0.850213	0.750759	1.22056	3.84227	0.608874	0.369389	0.412827	0.373319	0.544705	0.777912	0.676246	0.347514	0.233911	0.549226	-	10	50858935	50864146	+	5112	protein_coding	hypothetical protein	-
SORBI_3010G173201	0.00407957	0.0198415	0	0.0391822	0.186709	0.0600231	0.0144901	0.0415842	0.0263393	0.219228	0.105169	0.0220342	0.0244401	0.003414	0.175058	0.0620583	0.0166813	0.00868658	0.048237	0.0143672	-	10	50842450	50856083	-	13634	protein_coding	hypothetical protein	-
SORBI_3010G173100	389.068	147.704	110.102	195.778	225.136	406.995	294.011	221.671	307.812	111.066	143.504	340.159	243.556	274.935	606.934	516.429	244.49	423.2	389.284	269.918	-	10	50836164	50840275	-	1800	protein_coding	hypothetical protein	GST_N
SORBI_3010G173000	5.36045	4.59238	6.61974	5.61553	7.24913	5.8609	4.26209	3.50903	3.3736	5.54978	5.68962	2.61824	3.04442	2.88086	2.33012	3.7031	2.65438	2.82731	3.96469	4.56077	-	10	50832220	50835434	+	1131	protein_coding	hypothetical protein	-
SORBI_3010G172900	1.42147	22.0787	7.84238	2.20202	6.89536	12.245	12.2151	12.1525	5.92101	23.3738	2.0182	1.9813	3.29645	8.9793	8.89535	6.90554	7.83732	0.488182	5.02748	8.88171	-	10	50823396	50827585	-	1213	protein_coding	hypothetical protein	Hist_deacetyl
SORBI_3010G172800	0.0629908	2.55304	0.0332509	0.268886	0	0.509734	0.790532	0.642083	0.288074	0.241786	0.343257	0.0648038	0	4.44555	10.155	1.27762	6.33617	0	0.0225699	0	-	10	50793360	50798577	+	2649	protein_coding	hypothetical protein	HLH
SORBI_3010G172700	3.54649	1.29366	1.17005	8.32634	6.62245	6.34856	2.01547	1.90021	4.5795	3.97045	0.929134	1.66466	3.00992	1.75601	3.40827	2.40524	1.11178	1.00687	2.79559	6.21022	-	10	50720069	50725614	-	1882	protein_coding	Ent-kaurene oxidase, chloroplastic [Source:Projected from Arabidopsis thaliana (AT5G25900) UniProtKB/Swiss-Prot;Acc:Q93ZB2]	p450
SORBI_3010G172666	0	0	0	0	0	0	0	0	0	0.665691	0	0	0	0	0	0	0	0	0	0	-	10	50709136	50717694	-	449	protein_coding	hypothetical protein	-
SORBI_3010G172633	0	0	0	0	0	0	0	0	0	1.4121	0	0	0	0	0	0	0	0	0	0	-	10	50704473	50705656	+	635	protein_coding	hypothetical protein	-
SORBI_3010G172600	0	0	0.0717861	0.0967509	0	0	0.0644037	0	0.0365841	0	0	0	0.181047	0	0	0.0689571	0.0370713	0.0965223	0	0	-	10	50701490	50702716	-	1227	protein_coding	hypothetical protein	-
SORBI_3010G172500	328.502	103.962	290.382	189.677	81.4722	149.546	160.3	131.192	136.957	178.03	86.8316	130.056	82.8992	102.155	225.228	203.544	116.447	83.8476	101.936	77.7816	-	10	50687888	50695072	-	2332	protein_coding	hypothetical protein	ATP-synt_ab
SORBI_3010G172400	68.3416	16.9363	34.2123	78.3165	45.8722	32.3787	30.6266	37.5942	24.662	51.1556	35.6429	35.0751	41.723	29.2204	48.4532	35.8008	31.7127	40.8563	31.4216	36.9017	-	10	50682130	50686559	-	2348	protein_coding	hypothetical protein	-
SORBI_3010G172300	0	0.454655	5.51024	0	0.0617359	0.152821	0.774739	5.4159	0.0419129	0.0398687	0.0326542	0.120214	0	1.39075	0.0928549	0.118502	1.35907	0	0	0	-	10	50654554	50655624	+	1071	protein_coding	hypothetical protein	-
SORBI_3010G172200	0.0320397	40.7961	640.519	0.102575	0	0.565684	1.8891	68.634	2.53404	0.0491928	0	0	0	0.804376	0.114571	0.0243693	0.183413	0	0	0	-	10	50613645	50615380	-	1736	protein_coding	hypothetical protein	p450
SORBI_3010G172100	1.8794	0.151086	0.245969	0.994527	4.24669	0.674155	0.584786	0.243576	0.26324	0.143086	0.410179	0.32358	0.387713	0.116984	0.361022	0.0236276	0.355661	0.165363	0.367307	1.00284	-	10	50554469	50558049	-	3581	protein_coding	hypothetical protein	-
SORBI_3010G172000	0.476906	2.27973	0.906278	0.581643	3.93605	1.14273	1.21962	1.5385	1.55054	2.58372	2.6645	0.956733	0.843517	0.878021	0.316712	0.725468	0.523729	0	0.981325	1.42361	-	10	50550148	50554318	+	4082	protein_coding	hypothetical protein	-
SORBI_3010G171900	0.0713393	0.115656	33.2142	2.25855	0	1.6619	0.472992	3.26299	1.49693	1.62473	0	0	0	0.437804	1.97705	0.506432	1.63355	0	0	0	-	10	50443758	50447186	-	2339	protein_coding	hypothetical protein	-
SORBI_3010G171800	102.888	0.0250018	0	21.093	7.94407	0.0567252	0	0	0.0622301	16.989	14.8036	14.9533	12.9858	0.279623	0.0919109	0.039099	0.231216	21.18	7.26624	8.3277	-	10	50424294	50428647	+	2164	protein_coding	hypothetical protein	-
SORBI_3010G171600	9.83782	20.8278	36.5523	16.6742	21.3944	18.7074	21.0361	27.2382	6.71195	6.5623	6.41442	3.17662	2.08013	19.8833	18.4025	11.9471	16.5368	0.17603	1.99055	2.25152	-	10	50370481	50383361	+	3364	protein_coding	hypothetical protein	Pkinase
SORBI_3010G171501	96.4151	36.0964	29.5816	49.7023	48.3944	34.6322	46.4143	60.0325	26.7033	47.7152	51.7215	68.1232	65.489	60.9872	50.7722	40.5849	75.0116	127.351	118.945	55.3622	-	10	50362669	50366018	+	664	protein_coding	hypothetical protein	-
SORBI_3010G171400	11.6753	14.8275	1.90205	2.9405	4.52482	7.31556	8.92119	15.2345	4.70412	2.04751	4.80887	7.7819	9.15313	12.6381	3.2686	2.86154	9.24463	12.1103	9.66398	10.6992	-	10	50311412	50314560	+	3149	protein_coding	hypothetical protein	-
SORBI_3010G171300	1.76401	2.41498	6.34573	10.0284	4.67934	0.488642	1.18349	1.89544	0.676669	6.97166	3.22476	4.88984	3.3052	7.24442	0.136283	1.29201	5.83274	1.41433	6.64827	9.05015	-	10	50278532	50284909	+	5108	protein_coding	hypothetical protein	-
SORBI_3010G171200	0.456376	1.99768	1.3551	0.91318	1.49192	1.04917	1.29679	1.20772	2.99258	1.44521	1.79347	0.968368	1.36704	0.7161	1.88695	1.7356	1.72615	1.2147	0.306603	2.41086	-	10	50275027	50276001	+	975	protein_coding	hypothetical protein	-
SORBI_3010G171100	38.0854	25.5154	36.2608	27.0956	29.9414	15.3948	16.3277	19.0903	18.2923	21.3163	24.53	28.1785	36.4645	26.6569	22.1283	20.4582	23.158	32.2774	26.7627	29.6018	-	10	50269394	50277649	+	1919	protein_coding	hypothetical protein	RRM_1
SORBI_3010G171000	25.3576	5.30214	8.7578	30.6963	16.442	13.3831	8.70419	8.263	12.8031	59.9866	18.3645	27.3024	26.0446	10.8241	20.8316	14.3292	14.4223	27.7585	14.6967	21.8491	-	10	50259168	50266659	+	4898	protein_coding	hypothetical protein	-
SORBI_3010G170900	3.37096	3.66031	2.9795	1.08758	5.89434	1.93199	3.50844	3.16565	2.02458	2.34711	5.64392	6.29076	6.45768	4.82194	0.876036	1.63974	3.75047	7.34467	6.82565	6.534	-	10	50234992	50237132	-	1419	protein_coding	hypothetical protein	-
SORBI_3010G170800	0	0	0	0	0.198199	0	0.0473761	0.0522929	0	0	0	0	0	0.0558112	0.417346	0	0	0	0	0	-	10	50232834	50233667	+	834	protein_coding	hypothetical protein	-
SORBI_3010G170700	0	0.15423	0.0502175	0.101522	0.376962	0.186626	0.337899	0.124322	0.127961	0.12172	0.0199388	0.146806	0.0949875	0.159224	0.0566976	0.120596	0.051866	0.135043	0	0.0372258	-	10	50208050	50209803	-	1754	protein_coding	hypothetical protein	-
SORBI_3010G170600	0.276568	21.0437	1.70323	4.98465	2.22832	3.52661	3.42726	2.84323	4.66247	1.55699	5.1203	1.5649	0.644341	5.22041	5.87895	9.11548	4.29734	0	1.61856	0.468962	-	10	50202452	50204430	+	1810	protein_coding	hypothetical protein	HSF_DNA-bind
SORBI_3010G170550	0	0	0	0	0	0	0	0	0	0	0	0	0	0	0	0	0	0	0	0	-	10	50197868	50199244	-	1191	protein_coding	hypothetical protein	-
SORBI_3010G170500	0	0	0	0	0	0	0	0	0	0	0	0	0	0	0	0	0	0	0	0	-	10	50182883	50185036	+	1290	protein_coding	hypothetical protein	-
SORBI_3010G170400	2.0247	0.871117	0.15415	8.62199	3.42514	0.472624	1.14787	0.228976	5.21632	1.43477	0.379472	0.0901287	0.0194386	1.12415	0.191446	8.11454	1.06671	0	0.209267	0.0685621	-	10	50177361	50180730	-	2857	protein_coding	hypothetical protein	p450
SORBI_3010G170300	16.1738	1.0456	0.71257	11.2044	1.97614	7.57668	8.5949	1.19566	4.88227	0.997917	1.36747	9.47052	5.54112	1.25519	4.06729	6.82587	1.86035	0.106457	6.12655	16.5803	-	10	50166260	50169740	-	2225	protein_coding	hypothetical protein	Glyco_hydro_1
SORBI_3010G170150	0.218121	0	0	0	0	0.0200577	0	0	0.132025	0.0627932	0.120004	0.126224	0.38113	0	0.0731232	0.0829513	0.0445946	0	0.0586153	0.0960206	-	10	50163162	50165306	+	2040	protein_coding	hypothetical protein	Pkinase
SORBI_3010G170000	3.49568	3.48262	7.14295	11.4622	6.56834	4.76994	2.4432	2.76307	7.94027	6.103	2.02072	9.63605	9.93625	1.60424	1.58773	2.68026	2.28239	2.52113	8.48481	19.1282	-	10	50099836	50118712	+	1973	protein_coding	hypothetical protein	MBOAT
SORBI_3010G169950	0.34763	1.18352	1.10102	0.556469	0.619867	1.02294	0.493896	0.408865	1.26249	0.533742	0.218579	1.60936	0.867751	1.16366	0.621547	0	0.710726	0	0.560509	0.816175	-	10	50082175	50082494	-	320	protein_coding	hypothetical protein	-
SORBI_3010G169900	44.6144	26.2675	32.5129	52.6581	29.0307	34.7929	29.3396	26.6937	29.2691	46.8321	22.1183	27.2599	34.6883	30.9702	37.9553	36.039	31.869	47.5216	28.371	26.5577	-	10	50073005	50084642	+	2552	protein_coding	hypothetical protein	-
SORBI_3010G169700	13.7724	8.04547	9.31285	19.4347	10.5764	11.1645	6.09116	6.15807	13.7177	7.13598	7.49072	7.96264	8.14478	6.09613	3.22221	7.01238	6.11244	7.35156	10.3588	13.4062	-	10	50030092	50034543	-	1466	protein_coding	hypothetical protein	Ndr
SORBI_3010G169600	35.7754	36.5227	23.0307	22.5961	42.3617	19.9488	24.462	26.7631	23.6434	27.2406	23.3297	25.8685	22.5146	26.3403	17.2622	26.9626	22.7575	13.1509	12.5763	19.5212	-	10	50015617	50027342	-	4773	protein_coding	Protein SHORT ROOT IN SALT MEDIUM 1 [Source:Projected from Arabidopsis thaliana (AT2G03150) UniProtKB/Swiss-Prot;Acc:F4IS91]	-
SORBI_3010G169500	0	0	0	0	0	0	0	0	0	0	0.0209291	1.15574	1.16323	0	0	0	0	3.33115	0.250457	0	-	10	50010083	50014020	+	1671	protein_coding	hypothetical protein	-
SORBI_3010G169300	70.9554	22.8811	16.381	25.4903	43.4555	12.9739	12.0118	10.5042	11.2613	13.7248	14.7141	30.4489	23.9463	9.95398	9.87546	14.98	8.10277	27.4418	36.8725	28.5235	-	10	49959346	49964179	+	2296	protein_coding	hypothetical protein	-
SORBI_3010G169250	0	0	0	0	0	0	0	0	0	0	0	0	0	0	0	0	0	0	0	0	-	10	49941417	49943410	+	1701	protein_coding	hypothetical protein	-
SORBI_3010G169200	0.103605	0	0	0.647585	3.47486	0	0	0	0	10.5442	3.60149	0.23982	0.251227	0	0	0	0	0	0.206822	0.312744	-	10	49920953	49925273	-	3758	protein_coding	hypothetical protein	POX
SORBI_3010G169100	0.662568	0	0	0.744285	0.145089	0.153923	0.66885	0	1.66046	0.187395	0.0877056	0	0.348188	0	0	3.66026	0	0.148505	1.16202	0.286557	-	10	49911879	49913473	+	1595	protein_coding	hypothetical protein	-
SORBI_3010G169000	11.2353	2.50606	42.3056	20.9568	1.34068	14.2343	23.0782	29.1866	74.8691	27.9437	2.70209	3.53855	0.843234	7.42526	16.084	80.0895	23.0011	0.409724	0.34473	0.790606	-	10	49892288	49898836	+	5203	protein_coding	hypothetical protein	ABC_tran
SORBI_3010G168900	28.6074	5.3339	19.2184	50.6471	23.2314	27.5026	17.695	22.6144	21.4066	23.0221	23.8407	12.1517	16.786	17.9463	17.9363	13.0617	29.5132	30.6378	11.1259	13.3732	-	10	49822005	49832628	+	2617	protein_coding	hypothetical protein	Na_H_Exchanger
SORBI_3010G168800	253.049	1.37676	5.15041	47.7232	3.7767	3.30089	6.75999	18.583	191.561	71.8052	35.5028	43.3578	67.3829	2.52012	3.76899	27.9668	7.14189	194.674	39.7829	41.3611	-	10	49810409	49814340	+	1847	protein_coding	myo-inositol oxygenase 1 [Source:Projected from Arabidopsis thaliana (AT1G14520) TAIR;Acc:AT1G14520]	-
SORBI_3010G168700	0	0	0	0.263808	10.8546	1.9095	0	0	0	4.53088	4.83788	0.0476848	0.246827	0	0	0	0	0	0.398584	0.471568	-	10	49763374	49767077	+	1800	protein_coding	hypothetical protein	Lipase_GDSL
SORBI_3010G168600	9.90603	7.82495	14.8501	6.37717	4.5491	11.0749	8.19623	8.63234	8.10593	8.27521	5.18808	7.89163	10.9695	8.86692	7.86951	5.87378	8.38304	21.0439	17.4175	5.47714	-	10	49719700	49727770	-	2420	protein_coding	hypothetical protein	-
SORBI_3010G168500	0.138066	0.0575574	0.0624692	0.442018	0.410314	1.29138	3.13852	0.046396	7.33818	0.93878	0.334844	11.5052	32.7702	0.313611	1.18138	1.47018	2.59692	62.9542	39.3496	44.085	-	10	49709453	49715823	-	2820	protein_coding	hypothetical protein	NAM
SORBI_3010G168400	5.34893	1.0367	1.21009	0.665241	1.03983	3.09176	2.77125	2.19165	0.113601	2.14577	0.581612	3.52205	3.01172	1.32942	5.5728	0.367073	2.89429	3.2113	3.37197	4.50873	-	10	49676714	49686420	-	2766	protein_coding	hypothetical protein	-
SORBI_3010G168301	4.35797	5.80735	3.94931	2.9302	5.59976	4.02136	6.13791	7.03168	4.59458	3.2682	3.62714	2.06029	2.41461	6.05021	5.72004	4.54091	8.1785	1.82369	1.4622	1.65601	-	10	49643221	49645569	+	2208	protein_coding	hypothetical protein	-
SORBI_3010G168200	15.5476	6.26242	9.22429	5.00092	7.05444	7.86137	11.8535	11.2636	10.9217	5.34582	14.292	29.0276	39.3562	9.45591	10.6495	9.79348	7.62883	102.207	57.4338	36.1945	-	10	49636518	49640250	-	1270	protein_coding	hypothetical protein	-
SORBI_3010G168100	0.0847879	0	0	0.226207	0	0	0	0	0.239497	1.56217	0.906302	2.38787	0.169317	0	0	0	0	7.40205	2.55191	3.43391	-	10	49635011	49636657	+	1312	protein_coding	hypothetical protein	-
SORBI_3010G168000	2.2771	4.57523	4.90656	2.03167	5.76878	5.2177	4.05724	4.00999	5.30229	3.69679	4.03711	1.92979	2.19908	3.53004	4.10472	4.23052	6.04451	3.97426	2.48781	3.90011	-	10	49629250	49630739	+	1490	protein_coding	hypothetical protein	-
SORBI_3010G167900	79.7281	89.6082	177.134	91.5405	62.1485	81.5981	74.8968	101.117	91.0666	71.0541	85.1335	94.7097	106.851	115.482	98.986	107.414	126.589	151.863	79.1444	132.975	-	10	49617108	49624092	-	3447	protein_coding	hypothetical protein	NTP_transf_2
SORBI_3010G167800	0	1.08007	0.408921	0.799138	1.10505	0	0.458585	0.465683	2.25069	0.356819	0	0	0.180479	0.453796	0.346266	0.0589208	0.401227	0	0.0277565	0.272816	-	10	49588916	49591069	-	2154	protein_coding	hypothetical protein	MatE
SORBI_3010G167700	0	0	0	0	0	0	0	0	0	0	0	0	0	0	0	0	0	0	0	0	-	10	49530964	49533962	+	1704	protein_coding	hypothetical protein	Pkinase
SORBI_3010G167601	0.245261	0.456398	0.135094	0.0455189	0.2662	0.0549127	0.295429	0.484952	0.0516357	0.458429	0.207851	0.115189	0.202298	1.07978	0.0857964	0.0567746	1.42145	0.0908227	0.722128	0.675973	-	10	49529325	49534540	-	5216	protein_coding	hypothetical protein	-
SORBI_3010G167500	20.8699	15.8088	46.6712	51.1188	9.45495	15.708	22.3949	47.5249	15.8084	7.10069	10.7388	9.73195	7.40481	27.5818	25.8662	12.7912	38.5649	2.67098	5.39348	10.2755	-	10	49525037	49529166	+	4035	protein_coding	hypothetical protein	Pkinase
SORBI_3010G167400	0	0	0	0	0	0	0	0	0	0	0	0	0	0	0	0	0	0	0	0	-	10	49455307	49455573	+	267	protein_coding	hypothetical protein	-
SORBI_3010G167332	0	0	0	0	0	0	0	0	0	0	0	0	0	0	0	0	0	0	0	0	-	10	49365278	49366439	-	882	protein_coding	hypothetical protein	-
SORBI_3010G167266	0	0	0	0	0	0	0	0	0	5.27877	0	0	0	0	0	0	0	0	0	0	-	10	49341317	49342950	-	1456	protein_coding	hypothetical protein	-
SORBI_3010G167200	0.0760194	0	0	0	0.0150613	0	0	0	0	0	0	0	0	0	0	0	0	0	0	0.0892401	-	10	49330010	49333534	-	2195	protein_coding	hypothetical protein	-
SORBI_3010G167100	0	0	0	0	0	0	0	0	0	0	0	0	0	0	0	0	0	0	0	0	-	10	49303492	49304931	+	1440	protein_coding	hypothetical protein	-
SORBI_3010G167000	0	0	0	0	0	0	0	0	0	0	0	0	0	0	0	0	0	0	0	0	-	10	49237234	49237659	-	426	protein_coding	hypothetical protein	-
SORBI_3010G166950	0	0	0	0	0	0	0	0	0	0	0	0	0	0	0	0	0	0	0	0	-	10	49218365	49219810	+	1446	protein_coding	hypothetical protein	-
SORBI_3010G166900	0	0	0	0	0	0	0	0	0	0	0	0	0	0	0	0	0	0	0	0	-	10	49146612	49148045	+	1434	protein_coding	hypothetical protein	-
SORBI_3010G166850	0	0	0	0	0	0	0	0	0	0	0	0	0	0	0	0	0	0	0	0	-	10	49143981	49145077	+	1097	protein_coding	hypothetical protein	-
SORBI_3010G166800	0	0	0.0419037	0	0.0157277	0	0	0	0	12.0054	0.0499133	0.26542	1.53239	0.0221439	0	0	0.0216396	0.0563429	1.30839	2.05014	-	10	49101074	49108322	+	2102	protein_coding	hypothetical protein	Aa_trans
SORBI_3010G166700	11.0333	3.9773	9.764	43.2189	2.37242	97.0424	17.0357	2.01013	75.6089	8.24591	5.65193	12.7697	12.8634	1.84665	47.7511	86.19	18.3644	6.21876	13.7086	27.4661	-	10	49093214	49095818	-	1714	protein_coding	hypothetical protein	Thaumatin
SORBI_3010G166600	0.0243524	0.0236882	0	0.025988	0	0	0	0.0190947	0	20.9197	0.030624	0	0	0	0	0	0	0	0	0	-	10	49084735	49090834	+	2284	protein_coding	hypothetical protein	Aa_trans
SORBI_3010G166500	292.047	119.207	414.25	86.808	5.15511	57.1412	64.7664	80.0757	44.602	11.5213	36.2569	25.1925	23.7632	101.243	125.699	35.6183	100.293	21.9974	17.3731	28.0427	-	10	49075951	49082692	+	1879	protein_coding	hypothetical protein	Aa_trans
SORBI_3010G166400	3.96731	6.03702	1.89724	2.99718	4.7278	4.3923	4.96687	3.89615	4.13699	3.45274	4.0505	6.37986	7.29499	4.05967	4.16121	5.1537	3.93509	11.7513	8.25457	6.61701	-	10	49060195	49064132	-	2832	protein_coding	hypothetical protein	-
SORBI_3010G166300	0	0	0	0	5.07995	0	0	0	0	0.480926	0	0	0.0893581	0	0	0	0	0	0.144298	0.210117	-	10	49049942	49051305	-	1243	protein_coding	hypothetical protein	-
SORBI_3010G166201	0	0	0	0	0	0	0	0	0	0	0.0327152	0	0	0	0	0	0	0	0	0	-	10	49042717	49043954	-	1069	protein_coding	hypothetical protein	-
SORBI_3010G166100	159.568	44.9119	9.45137	68.5565	49.9096	28.3558	37.2152	29.2482	24.6854	14.6998	22.2553	73.6165	66.0473	52.4429	28.7524	57.815	54.5024	114.726	103.091	45.0538	-	10	49040220	49042531	+	671	protein_coding	hypothetical protein	Ribosomal_S24e
SORBI_3010G166000	2.57219	4.27699	2.82	3.75378	7.77487	4.60931	4.01364	2.99942	5.26954	9.19808	6.44159	5.41119	4.71947	5.1146	3.49835	3.52822	3.38002	2.43419	4.23003	4.38734	-	10	49023086	49028125	+	2530	protein_coding	hypothetical protein	-
SORBI_3010G165975	0	0	0	0	0	0	0	0	0	0	0	0	0	0	0	0	0	0	0	0	-	10	49014458	49016356	-	1677	protein_coding	hypothetical protein	-
SORBI_3010G165950	0	0	0	0	0	0	0	0	0	0	0	0	0	0	0	0	0	0	0	0	-	10	49000466	49002051	+	288	protein_coding	hypothetical protein	-
SORBI_3010G165925	0	0	0	0	0	0	0	0	0	0	0	0	0	0	0	0	0	0	0	0	-	10	48975710	48977731	-	1752	protein_coding	hypothetical protein	-
SORBI_3010G165900	9.98184	5.7411	4.95324	9.23004	11.1384	7.1431	5.29399	7.059	10.6021	8.45635	11.3896	5.58227	4.99689	5.39439	10.0906	8.56447	5.91658	0.231654	5.93491	7.79058	-	10	48959135	48961381	+	2045	protein_coding	hypothetical protein	-
SORBI_3010G165800	6.31099	3.92888	5.06369	16.8821	18.6054	12.9996	10.5803	6.6639	5.9761	11.8215	12.3806	4.73962	3.52876	10.4219	25.5013	14.7204	16.9972	0.358344	4.79386	8.59392	-	10	48957548	48958391	+	661	protein_coding	hypothetical protein	-
SORBI_3010G165700	3.77351	3.95573	14.9946	7.62689	12.7078	8.69768	7.68154	7.42802	6.06827	6.51528	6.52994	5.11592	2.32291	4.47398	6.48481	6.78426	5.61256	0.64398	1.88055	2.85122	-	10	48943124	48956174	+	11954	protein_coding	hypothetical protein	-
SORBI_3010G165500	185.526	26.4475	59.9256	144.185	2.47023	17.5586	39.1944	31.8717	89.3933	17.0186	15.4654	12.9468	9.02655	15.6834	34.1677	29.8825	34.2181	0.868397	3.1209	11.7297	-	10	48920369	48930191	-	5728	protein_coding	hypothetical protein	ABC2_membrane
SORBI_3010G165400	0	0	0.0817842	0.165339	0	0	0	0	0.0416794	0.0396466	0	0	0.0515655	0.172875	0	0	0.295641	0.219931	0.333079	0.363755	-	10	48914015	48915091	+	1077	protein_coding	hypothetical protein	-
SORBI_3010G165300	12.5235	5.43102	11.4159	13.7116	1.72229	3.21311	6.04474	3.30278	12.9019	2.30045	2.7907	6.66375	5.3913	4.28204	3.5508	29.9415	8.58868	0.812627	3.93519	9.80655	-	10	48885084	48894241	+	3935	protein_coding	hypothetical protein	Kinesin
SORBI_3010G165200	2.15189	2.37703	39.7955	14.3624	0.325176	0.40247	1.42501	0.571964	12.4217	5.09592	0.80265	0	0	0.976714	1.98895	7.51784	1.93877	0	0	0	-	10	48811996	48813520	-	1525	protein_coding	hypothetical protein	-
SORBI_3010G165100	19.1114	2.86352	5.13048	22.4728	10.4891	10.0948	1.4384	0.84269	12.3315	5.06988	5.21994	2.10315	3.73247	0.886352	3.87096	7.99664	0.522247	2.55372	5.12322	4.40657	-	10	48796058	48799628	-	3571	protein_coding	hypothetical protein	-
SORBI_3010G165000	0.0383328	0.484735	2.9745	1.18632	0.045568	0	0.108923	0.18034	0	0.0294275	0	0	0	1.47563	0	0	1.00315	0	0	0	-	10	48790166	48791616	-	1451	protein_coding	hypothetical protein	-
SORBI_3010G164900	0.681942	0	0	3.54776	0.734657	0	0	0	0	0.490797	0.133995	0	0	0	0	0.0972533	0	0.0907531	0.503957	1.00067	-	10	48772483	48773787	+	1305	protein_coding	hypothetical protein	-
SORBI_3010G164800	0.0652827	0	0.310146	1.25401	0.0776046	1.29669	0	0	0	1.00233	0.944096	0.453341	0.325916	0.0546321	0	0	0.0533879	0.139006	1.0526	4.90471	-	10	48765483	48766334	+	852	protein_coding	hypothetical protein	AP2
SORBI_3010G164600	0.069163	0.0134553	0	0.191902	0.0575521	0	0	0	0	0.0318573	0.217437	0.149423	0	0	0	0	0	0	0	0	-	10	48682348	48702944	+	4021	protein_coding	hypothetical protein	NB-ARC
SORBI_3010G164500	0.15312	0.037236	0.121241	70.2231	1.43341	18.7552	0	0	4.01619	123.984	504.01	616.158	223.749	0	0.92398	0.145579	0.0626104	74.2549	341.896	186.131	-	10	48651083	48652795	-	1453	protein_coding	hypothetical protein	-
SORBI_3010G164400	25.8288	61.651	153.664	103.48	4.25222	4.91705	0.81123	2.10687	1.65351	4.3576	17.085	2.151	8.7865	0.871342	1.5914	0.332106	0.219741	1.2158	3.64647	19.8721	-	10	48575060	48577328	-	1656	protein_coding	hypothetical protein	HSF_DNA-bind
SORBI_3010G164350	0	0	0.0281591	0.0189759	0	0.0130811	0	0.0139425	0	4.73679	0.0335415	0.0274401	0.177545	0.0148806	0	0	0	0.0757243	0.0764547	0.292237	-	10	48566449	48569660	-	3128	protein_coding	hypothetical protein	-
SORBI_3010G164300	0	0	0	0	0	0	0	0	0	0	0	0	0	0	0	0	0	0	0	0	-	10	48556705	48558092	+	583	protein_coding	hypothetical protein	-
SORBI_3010G164200	0.115038	145.359	315.345	11.1102	0	1.60794	1.75698	36.5766	0.649888	4.81306	0	0	0	14.3924	8.99862	4.76863	47.9795	0	0	0	-	10	48540088	48543492	-	967	protein_coding	hypothetical protein	-
SORBI_3010G164150	0	0	0	0	0	0	0	0	0	0	0	0.070819	0	0	0	0	0	0	0	0	-	10	48510223	48511051	-	606	protein_coding	hypothetical protein	-
SORBI_3010G164100	0	0	0	0	0	0	0	0	0	0	0	0	0.198201	0	0	0	0	0	0.3414	2.37687	-	10	48401814	48403745	+	1401	protein_coding	hypothetical protein	-
SORBI_3010G164000	3.59124	4.45522	11.5116	3.53622	3.44413	4.28833	3.74659	4.06739	4.69049	4.515	4.6252	4.56471	4.03615	3.96357	4.00148	4.16982	4.90902	4.65457	3.95352	5.05081	-	10	48243337	48248165	-	3206	protein_coding	hypothetical protein	FYVE
SORBI_3010G163900	26.7233	6.37147	13.6415	10.1914	41.1568	28.6485	14.096	9.90501	11.7497	12.233	15.5049	8.89754	10.085	3.06318	13.7288	12.0154	3.46606	4.80529	10.4429	13.1816	-	10	48237055	48240678	+	2021	protein_coding	hypothetical protein	-
SORBI_3010G163800	0.415898	1.17108	0.184875	0.334821	1.60896	0.595812	1.33727	1.60764	0.942173	0.705774	0.449602	0.253343	0.502687	0.555652	0.997998	0.721458	0.787644	0.062145	0.125489	0.2227	-	10	48215148	48222770	+	7623	protein_coding	hypothetical protein	Pkinase
SORBI_3010G163732	0.179567	0	0	1.29349	0.0266824	0	0.03189	0	0	0.758181	0	0	0	0	0	0	0	0	0	0	-	10	48208690	48210051	+	1239	protein_coding	hypothetical protein	-
SORBI_3010G163666	2.3889	9.07578	12.063	5.96453	4.09896	3.78009	2.3374	4.34709	2.50998	4.18689	2.26727	0.799899	2.56528	3.88516	9.02604	3.29116	5.63973	2.59132	0.678303	2.32815	-	10	48196405	48197638	+	1234	protein_coding	hypothetical protein	-
SORBI_3010G163600	92.8577	55.573	288.657	94.3705	58.4114	47.5075	48.9457	67.9093	30.0098	44.1387	54.6856	75.9072	98.1761	71.3888	90.4619	57.7933	86.075	175.21	179.923	110.657	-	10	48194404	48199431	-	1068	protein_coding	hypothetical protein	Ras
SORBI_3010G163400	1.28066	5.30048	8.54968	3.83206	5.19401	6.65029	5.01254	5.31617	9.7681	6.07237	5.98403	2.46066	2.80814	4.22386	1.68365	5.08044	4.18927	1.60406	1.80847	4.86389	-	10	48178650	48182164	-	2215	protein_coding	hypothetical protein	-
SORBI_3010G163200	0.0949161	0.0923275	1.05217	0.405165	0	0.62843	0.809113	0.297695	1.60864	0.218597	0.537122	0.219708	0.284314	0.397155	0.509117	0.938511	1.08671	0	0.204053	0	-	10	48153145	48153730	+	586	protein_coding	hypothetical protein	-
SORBI_3010G163150	29.2911	74.7686	70.8526	312.31	2.21928	280.694	93.7945	39.9779	108.429	4.69495	33.3535	4.12275	7.26339	153.97	101.232	167.311	118.244	0	4.22111	3.55187	-	10	48152243	48153139	-	864	protein_coding	hypothetical protein	-
SORBI_3010G163100	18.9245	20.0904	18.8638	21.5283	13.8176	16.3954	18.2204	14.0102	14.9629	7.74341	8.15423	14.6019	19.4712	18.1684	14.2559	20.4585	19.5615	37.8412	29.1193	18.156	-	10	48131084	48135749	-	579	protein_coding	hypothetical protein	-
SORBI_3010G163000	7.07652	12.5082	158.983	0.117538	0	1.31666	1.50614	18.3517	1.11111	3.65692	3.2895	3.52678	1.89702	23.5037	78.2781	2.40846	42.6042	0.527671	0.355174	1.32527	-	10	48114038	48116057	-	2020	protein_coding	hypothetical protein	FAD_binding_4
SORBI_3010G162900	1.82868	0.755598	40.4914	0.449018	0	5.89302	1.48298	1.30697	1.22768	1.1678	0.030526	0.0874059	0.0646332	3.64301	17.9393	3.8034	7.79503	0.0344582	0.0521859	0.284961	-	10	48098731	48102167	-	3437	protein_coding	hypothetical protein	FAD_binding_4
SORBI_3010G162800	6.92998	0	0	0	0	0	0	0	0	0	0.0650351	0.0598554	0.361462	0	0	0	0	0	0.0277953	0.121421	-	10	48091245	48093395	-	2151	protein_coding	hypothetical protein	FAD_binding_4
SORBI_3010G162700	0.233824	0	0.0462856	0	0	0	0	0	0	604.006	0.0551328	0	0	0	0	0	0	0	0	0.0343111	-	10	48073190	48075092	-	1903	protein_coding	hypothetical protein	FAD_binding_4
SORBI_3010G162500	0.103491	0.682311	8.26732	0.0613569	0.00683472	0.203024	0.432938	0.252459	1.96742	0.0529659	0.0361511	0.0088725	0.0803705	0.952679	0.318676	0.0262385	0.178673	0	0.135965	0.0809932	-	10	47975241	47980077	-	4837	protein_coding	hypothetical protein	FAD_binding_4
SORBI_3010G162400	15.4502	2.06014	8.13737	4.11273	8.41966	3.065	6.93058	3.07627	1.5131	2.63872	2.48869	1.84845	3.77867	5.28806	12.4775	3.32737	6.84284	0	2.3512	4.40184	-	10	47964514	47966115	-	1602	protein_coding	hypothetical protein	FAD_binding_4
SORBI_3010G162300	0	0	0	0	0	0	0	0	0	0	0	0	0	0	0	0	0	0	0	0	-	10	47962202	47962765	-	555	protein_coding	hypothetical protein	SRF-TF
SORBI_3010G162200	2.45838	5.25369	7.44704	4.08431	1.04055	3.95271	4.07487	4.51967	4.8248	2.01594	1.94975	1.7316	2.11991	4.19254	4.32888	3.52012	3.6249	3.21214	2.25217	2.51425	-	10	47954071	47963344	-	5973	protein_coding	hypothetical protein	-
SORBI_3010G162101	0.185248	0	0	0	0	0	0	0	0	0	0	0	0	0	0	0	0	0	0	0	-	10	47930108	47933456	-	1201	protein_coding	hypothetical protein	FAD_binding_3
SORBI_3010G162000	152.353	23.1314	17.0915	0	0	0.0988352	0.127252	1.33435	0	0.137518	1.66134	20.1105	51.4223	9.78152	0	0	2.19741	11.5381	29.2199	15.3509	-	10	47914566	47916015	-	1242	protein_coding	hypothetical protein	-
SORBI_3010G161900	2.17352	0	0	46.1621	5.5064	6.65799	0.0759354	0.0279387	2.87564	16.1388	0.0896159	0	0	0	1.14674	4.20071	0.0874179	0	0.191504	0.125485	-	10	47906858	47908637	-	1561	protein_coding	hypothetical protein	-
SORBI_3010G161800	53.5193	0.170352	0.055467	5.04607	0.187365	1.08221	0.34834	0.0274636	0.254407	0.0268888	0.418438	1.18912	0.384695	0	0.626244	0.159843	1.11711	0	0.225898	0	-	10	47883421	47885271	-	1588	protein_coding	hypothetical protein	-
SORBI_3010G161700	17.7377	0.117108	0	1.11347	0.119262	0.383789	0.199554	0.188798	0.0971616	0	0	0	0	0	0.215255	0.183139	4.66023	0	0	0	-	10	47877538	47879117	+	1386	protein_coding	hypothetical protein	-
SORBI_3010G161600	0.984339	1.549	2.35325	0.129786	0	1.35321	6.27705	15.1712	0.134957	0.323856	0.155328	0.199406	0.174558	14.4204	7.87223	0.00867205	9.73134	0	0.204262	1.20907	-	10	47838813	47853663	+	14635	protein_coding	hypothetical protein	-
SORBI_3010G161525	23.5701	13.5971	1.43561	5.92943	11.6977	5.98062	10.0545	8.39226	6.37221	5.29813	6.56426	12.9742	10.9787	12.1873	8.15658	10.1648	11.1444	14.3838	12.4793	8.92557	-	10	47766267	47776242	+	1902	protein_coding	hypothetical protein	-
SORBI_3010G161450	33.6592	1.86565	5.27354	46.5137	0.476037	15.5981	6.82733	3.88362	23.6775	2.94478	5.87073	4.08185	4.67185	3.36885	11.1167	13.4017	5.75691	2.87219	3.28503	7.54629	-	10	47747274	47750839	-	2639	protein_coding	O-fucosyltransferase 8 [Source:Projected from Arabidopsis thaliana (AT1G29200) UniProtKB/Swiss-Prot;Acc:F4HZX7]	-
SORBI_3010G161400	0	0	0	0.163427	0.0182046	0.0225318	0.0652726	0	0	1051.73	0	0	0	0.256313	0.0273809	0	0	0.0652163	0	0.143819	-	10	47734010	47735942	-	1816	protein_coding	hypothetical protein	-
SORBI_3010G161300	1.26627	0.0153967	0.200527	0.945923	1.55231	0.0582211	0.0787086	0.037233	0	0.546804	0.288619	0.158768	0.173846	0.569579	0.212253	0.0361171	0.336553	0	0.204169	0.278717	-	10	47721787	47725868	+	3514	protein_coding	hypothetical protein	Pkinase_Tyr
SORBI_3010G161201	1.60887	19.3761	24.5075	0.981102	5.55546	8.39773	37.4436	47.8774	4.20445	7.93996	5.25071	3.42857	1.45342	18.4647	3.90393	3.9042	10.0246	5.38331	4.28231	3.23772	-	10	47679337	47680216	-	726	protein_coding	hypothetical protein	-
SORBI_3010G161100	0	0	0	0	0	0	0	0	0	0	0	0.0621075	0	1.88611	0	0	1.25071	0	0	0	-	10	47676574	47677465	-	691	protein_coding	hypothetical protein	-
SORBI_3010G161050	0	0	0	0	0	0	0	0	0	0	0	0	0	0	0	0	0	0	0	0	-	10	47644843	47646819	+	1977	protein_coding	hypothetical protein	-
SORBI_3010G161000	0.11955	0	0	0	0	0	0.0212314	0	0	0.596552	0	0	0	0.0250116	0.0534377	0	0	0	0.0321266	0.0350854	-	10	47630161	47632021	-	1861	protein_coding	hypothetical protein	Pkinase
SORBI_3010G160900	5.47259	0.0700439	0.195483	0.0219555	0	0.158919	0.0511526	0.169384	0.0249059	0.0315882	0	0	0	0.12052	0.110354	0.00782415	0.0336501	0	0.0884595	0.0966066	-	10	47356820	47362831	-	5407	protein_coding	hypothetical protein	Myb_DNA-binding
SORBI_3010G160850	0	0.250481	0	0	0.22958	0.0947171	0.137193	0.0504771	0	0.790729	0.0809551	0.149015	0.192833	0.107747	0.230203	0.0979286	0.368525	0.685375	0.276794	0.302287	-	10	47341074	47342155	-	864	protein_coding	hypothetical protein	-
SORBI_3010G160800	0	0	0	0	0	0	0	0	0	0	0	0	0	0	0	0	0	0	0	0	-	10	47323693	47325384	+	1149	protein_coding	hypothetical protein	-
SORBI_3010G160700	0	675.518	4823.83	0.293797	0.00545447	0.148522	181.874	178.795	0.592492	19.2327	0.0115402	0.0637266	0	77.2268	0.0902428	0.118658	32.263	0	0	0.0107728	-	10	47244445	47253575	-	6061	protein_coding	hypothetical protein	-
SORBI_3010G160600	0.274187	0.342912	0.124059	0	0.325939	0.0576307	0.0834754	0.21499	0	0.3007	0.0246286	0	0.0782198	0.163896	0	0	0	0	0.252624	0.229908	-	10	47239943	47241636	-	1420	protein_coding	hypothetical protein	HMA
SORBI_3010G160500	0.890511	0.140469	0.038114	0.385266	3.22585	0.300996	0.0598403	0.226459	0.281647	0.665157	0.522092	0.241416	0.70892	0.0201413	0.118339	0.18306	0	0.102495	1.19006	2.98075	-	10	47233117	47240035	-	4622	protein_coding	hypothetical protein	DEAD
SORBI_3010G160400	5.29722	0.966142	1.45637	6.24187	0.830862	2.48971	1.20208	1.49989	1.15784	6.8624	4.57975	5.61999	2.97514	0.769619	1.67719	1.11918	0.902509	3.68144	3.63787	5.05251	-	10	47229355	47235565	+	1512	protein_coding	hypothetical protein	-
SORBI_3010G160300	28.3898	12.6806	12.7305	41.6579	31.2086	17.5552	17.3121	15.3324	18.7913	52.9016	28.8478	31.0696	47.7624	20.3035	24.4734	44.2882	23.217	46.417	42.3495	34.5174	-	10	47220773	47228109	+	1536	protein_coding	hypothetical protein	RRM_1
SORBI_3010G160200	0.179809	0.155471	0.063277	0.106603	0.0237497	0.029395	0.212886	0.281976	0.0644952	0	0	0	0	0.0835965	0.0178606	0	0.0653541	0	0	0.0234533	-	10	47072832	47075615	+	2784	protein_coding	hypothetical protein	-
SORBI_3010G160100	0	0	0	0	0	0	0	0	0	0.670086	0.0457357	0.411577	0.266302	0	0	0	0	0.258136	0.260626	0.142315	-	10	47065517	47067810	-	2294	protein_coding	hypothetical protein	-
SORBI_3010G160066	0	0	0	0	0.0245249	0	0	0.129413	0.0333002	0.221733	0.0259441	0	0	0	0.0368871	0.0313837	0	0	0	0	-	10	47031954	47034021	-	1348	protein_coding	hypothetical protein	-
SORBI_3010G160033	5.34041	0	23.1906	1.8997	0	0.222379	0.0238597	24.2554	9.59577	0	0.929224	0.0518313	0	0	0.240212	0	0.0274677	0.143035	0	0	-	10	47028583	47030238	+	1656	protein_coding	hypothetical protein	Lipase_3
SORBI_3010G160000	0.276721	0	0.438217	0	0	0	0	0.180814	0.148884	0	0	0	0	0	0	0	0	0	0	0	-	10	47026111	47027316	-	1206	protein_coding	hypothetical protein	Lipase_3
SORBI_3010G159900	0.0645254	0	0.238426	0	0	0	0	0.0337295	0.0347167	0	0.0405715	0	0	0	0	0	0	0	0	0	-	10	47008345	47010930	+	2586	protein_coding	hypothetical protein	Lipase_3
SORBI_3010G159800	0	0	0	0	0	0	0	0	0	0	0	0	0	0	0	0	0	0	0	0	-	10	47006857	47007417	+	561	protein_coding	hypothetical protein	-
SORBI_3010G159700	4.93775	2.85743	15.5859	7.36823	11.9235	5.17783	4.31026	16.7926	18.0136	9.05257	9.58247	2.809	3.53472	3.90806	3.80074	4.79959	6.43354	0.677166	1.28643	3.29123	-	10	46999511	47006156	-	6646	protein_coding	hypothetical protein	Lipase_3
SORBI_3010G159600	0	0	0	0	0	0	0	0	0	0	0	0	0	0	0	0	0	0	0	0	-	10	46879826	46880509	+	318	protein_coding	hypothetical protein	-
SORBI_3010G159500	0.0706745	0.618723	16.5643	0.150843	0	0.0519921	1.15473	3.65744	0	3.25535	0	0	0.987935	0.82802	11.9413	0	4.56599	0	1.44341	0.414828	-	10	46845559	46846569	-	787	protein_coding	hypothetical protein	-
SORBI_3010G159400	7.43054	0.654955	8.56824	12.3692	0.314444	11.6402	4.39019	1.84782	17.2529	2.54756	5.36761	7.79284	4.73005	4.44738	10.2758	6.71249	5.17204	1.94572	3.67049	6.35156	-	10	46836727	46839039	+	2313	protein_coding	Cationic amino acid transporter 8, vacuolar [Source:Projected from Arabidopsis thaliana (AT1G17120) UniProtKB/Swiss-Prot;Acc:Q9SHH0]	-
SORBI_3010G159300	0	0	0	0	0	0	0	0.00968085	0	0	0	0	0	0	0	0	0	0	0	0	-	10	46827532	46832036	+	4505	protein_coding	hypothetical protein	-
SORBI_3010G159200	0	0.125241	0	0	0	0	0	0	0	0.197682	0	0	0	0	0	0	0	0	0	0	-	10	46809407	46810109	+	432	protein_coding	hypothetical protein	-
SORBI_3010G159100	72.8859	21.0404	38.3706	120.702	68.0141	38.5363	31.3236	25.3059	35.7447	42.6617	48.9431	33.7578	19.5894	28.8145	25.3881	59.4287	36.5416	7.20623	23.1453	24.6436	-	10	46745739	46746872	-	1134	protein_coding	hypothetical protein	-
SORBI_3010G159000	1.09372	0.191018	1.362	2.88083	1.41097	1.4684	0.734576	1.02521	3.16163	4.45008	1.7677	0.577306	0.608077	0.470125	1.62665	1.03986	1.37825	0.169371	0.374073	0.370591	-	10	46692493	46714868	-	22376	protein_coding	hypothetical protein	-
SORBI_3010G158900	5.98697	2.50481	1.12141	4.25939	2.56365	9.28227	9.96939	8.48016	6.44236	8.69802	3.56202	1.24179	0.514223	8.24261	6.67588	9.10736	12.4772	0.5483	2.00676	2.26715	-	10	46688326	46690380	+	864	protein_coding	hypothetical protein	-
SORBI_3010G158832	12.8356	0.578033	2.63492	4.05858	14.5519	1.22404	0.590987	0.465943	1.39078	4.97247	4.48367	3.94316	2.55134	0.696209	1.00935	0.677967	0.680353	4.30205	3.51316	2.79034	-	10	46676010	46681744	-	936	protein_coding	hypothetical protein	-
SORBI_3010G158766	3.57198	4.18366	5.07941	5.28998	5.19941	5.41638	4.29813	4.85851	6.4715	5.31643	9.07546	3.26231	2.25638	4.45334	5.08317	7.65152	5.72307	2.48352	2.66419	3.42301	-	10	46675198	46675960	+	763	protein_coding	hypothetical protein	-
SORBI_3010G158700	0	0	0	0	0	0	0	0	0	0	0	0	0	0	0	0	0	0	0	0	-	10	46640205	46640849	+	645	protein_coding	hypothetical protein	-
SORBI_3010G158601	0	0	0	0.767543	0	0	0	0	0	0	0	0	0	0	0	0	0	0	0	0	-	10	46632119	46633700	+	696	protein_coding	hypothetical protein	-
SORBI_3010G158500	0.694393	0	0	0	0	0	0	0	0	0	0	0	0	0	0	0	0	0.887138	0	0	-	10	46585922	46586722	+	801	protein_coding	hypothetical protein	-
SORBI_3010G158400	0	0	0	0	0	0	0	0	0	0	0	0	0	0	0	0	0	0	0	0	-	10	46573122	46573947	+	826	protein_coding	hypothetical protein	-
SORBI_3010G158300	0	0	0	0	0	0	0	0	0	0	0	0	0	0	0	0	0	0	0	0	-	10	46511513	46512462	+	950	protein_coding	hypothetical protein	-
SORBI_3010G158200	0.685091	0	0	1.5993	0.1018	0.188997	0	0	0.0345563	1.21622	0.188459	0.132152	0.684047	0.0716652	0.076557	0	0	2.09696	1.33475	0.351854	-	10	46486918	46488216	+	1299	protein_coding	hypothetical protein	-
SORBI_3010G158100	1.08171	3.02086	3.37075	1.15436	1.28588	3.02904	10.2621	7.93447	1.57702	4.58067	5.2437	6.4886	3.76279	2.89091	2.93227	4.32606	4.62284	4.75515	4.42593	1.55657	-	10	46464410	46466003	+	1594	protein_coding	hypothetical protein	-
SORBI_3010G158050	0	0	0	0	0	0	0	0	0	4.89586	0	0	0	0	0	0	0	0	0	0	-	10	46459977	46462013	-	1378	protein_coding	hypothetical protein	-
SORBI_3010G158000	1.31352	1.47596	0.286911	1.06339	0.74034	1.88262	2.75102	2.18416	1.55356	2.22537	1.56636	1.78235	1.37936	2.1416	1.31598	1.55027	2.77808	1.01266	1.19283	1.22293	-	10	46405081	46408335	+	2456	protein_coding	hypothetical protein	-
SORBI_3010G157900	0	0	0	0	0.00151385	0	0	0	0	1.9279	0	0.00589564	0.0127155	0	0	0	0	0	0.00821333	0.00597985	-	10	46345791	46368042	+	21838	protein_coding	hypothetical protein	-
SORBI_3010G157800	4.68533	2.43671	1.54271	4.55448	4.35647	5.32375	6.55782	4.32849	8.79803	8.04842	9.74216	10.1295	8.61527	4.15386	4.60329	10.9027	6.44929	7.70456	7.97833	6.42593	-	10	46343913	46345600	-	1199	protein_coding	hypothetical protein	-
SORBI_3010G157700	4.00928	19.0664	4.58548	3.15799	18.9317	11.0721	15.122	15.4689	14.5862	8.28094	10.2237	9.15777	9.56313	8.20156	6.00213	6.97019	6.0371	12.1956	10.8425	10.8699	-	10	46338172	46343274	+	1748	protein_coding	hypothetical protein	-
SORBI_3010G157600	0.272651	0.530431	1.29532	0	0.97234	0.401155	1.35579	0	0.220042	0.418621	0.171434	0	1.90565	0.684508	0	0.414757	0.222973	0	1.17231	0	-	10	46335156	46336822	-	204	protein_coding	hypothetical protein	-
SORBI_3010G157500	0.0408977	4.37605	0.129532	0	0	0.150433	12.2893	10.9031	0.198038	0.0941898	0.0257151	0.473342	0	13.4164	5.26487	6.50131	24.449	0.087083	0.0879229	0.0480103	-	10	46245534	46246893	-	1360	protein_coding	hypothetical protein	-
SORBI_3010G157400	0	0	0	0	0	0	0	0	0	0	0	0	0	0	0	0	0	0	0	0	-	10	46197932	46199687	-	615	protein_coding	hypothetical protein	-
SORBI_3010G157300	0.0240783	0	11.401	0	0	0.0177133	0.0855232	1.11391	0.0194323	1.09059	0.666145	0.037157	0.0480831	1.1284	0.0215255	0.0549418	1.3193	0	0.569406	0.480519	-	10	46193899	46196208	+	2310	protein_coding	hypothetical protein	-
SORBI_3010G157200	0.21855	0.744062	1.55743	2.79874	1.62375	4.98409	1.4749	0.342729	3.61579	11.6605	9.89402	5.31184	3.92789	0.274341	0.293068	2.57654	1.60856	0	6.81273	5.38772	-	10	46187393	46187901	+	509	protein_coding	hypothetical protein	-
SORBI_3010G157100	0	0	0.386323	0.0867788	0.241663	0	0	0	0	3.43343	0.511295	0.752918	0.649544	0	0	0	0	3.98239	0.874088	1.6228	-	10	46184191	46184883	+	684	protein_coding	hypothetical protein	-
SORBI_3010G157000	0.558442	4.72595	3.97959	0.476761	1.12854	0.657314	3.96704	7.04977	2.16331	1.0289	1.47475	0.603241	0.446073	6.02862	2.24656	4.62978	2.28346	0	1.0805	0.983343	-	10	46160808	46161803	+	996	protein_coding	hypothetical protein	-
SORBI_3010G156800	0.666562	1.47687	0.762357	0.355666	0	0.844508	0.894406	0.493614	0.358631	0.284283	0	0	0.0369747	0.805732	0.595891	0.253493	0.635963	0	0	0	-	10	46109352	46110853	+	1502	protein_coding	hypothetical protein	-
SORBI_3010G156700	0.718759	0	0.0875562	0	0	0	0.0785521	0.0867043	0	0.0424447	0	0	0	0.0925378	0	0	0	0	0	0	-	10	46105748	46106753	+	1006	protein_coding	hypothetical protein	-
SORBI_3010G156601	0.331028	0	0	0.0129242	0.292732	0.014849	0	0	0	0.0557837	0.147221	0.183776	0.0886771	0	0	0	0	0.0515748	0.130181	0.018956	-	10	46081608	46095385	-	13778	protein_coding	hypothetical protein	-
SORBI_3010G156500	1.35261	0	0	0	0	0.271378	0.0582339	0	0	0	0	0	0	0	0.183212	0	0	0	0	0	-	10	46072989	46074345	-	1357	protein_coding	hypothetical protein	-
SORBI_3010G156400	0	0	0	0	0	0	0	0	0	0	0	0	0	0	0	0	0	0	0	0	-	10	46036524	46037336	-	813	protein_coding	hypothetical protein	-
SORBI_3010G156300	0.326031	0.0634278	0	0.0695858	0.658866	0	0.0926417	0.0511281	0.105249	0.100116	0	0	0	0.109136	0.0582928	0.0495957	0.0533253	0	0.070091	0	-	10	46020728	46021580	+	853	protein_coding	hypothetical protein	NB-ARC
SORBI_3010G156200	2.46798	0.266741	0.18094	1.87776	2.30901	1.12633	0.698029	0.286687	0.442616	0.210514	0.416683	0.546592	1.30056	0.172111	0.53115	0.764761	0.448511	1.02181	1.12992	1.20716	-	10	46018027	46022299	-	2434	protein_coding	hypothetical protein	-
SORBI_3010G156100	127.876	4.35512	0.981714	326.701	17.6249	38.8909	1.85937	2.21437	3.2242	22.4205	224.193	253.512	64.9583	0.0576428	2.67862	2.148	0.33798	9.97329	62.0828	26.6836	-	10	45980507	45984309	-	1615	protein_coding	hypothetical protein	Lipase_GDSL
SORBI_3010G156000	2.69389	8.50351	49.4779	9.18817	1.28722	2.38978	5.15941	8.03492	3.30377	4.29832	11.3254	8.39578	9.38786	5.79069	4.22629	4.21846	2.52703	2.47438	7.32441	10.7893	-	10	45969444	45974039	-	2106	protein_coding	hypothetical protein	Lipase_GDSL
SORBI_3010G155901	0.105944	0	0.167774	0.226121	0.440794	0.233816	0	0	0	0.243996	0.399687	0.163491	0.423132	0	0	0	0	0.225586	1.13881	0.497478	-	10	45964032	45964556	+	525	protein_coding	hypothetical protein	zf-AN1
SORBI_3010G155800	0.979686	0	0	0.640782	0.0563515	0	0	0	0	0	0.357674	0.097537	1.00975	0	0	0	0	0.538331	0.781315	1.52105	-	10	45951140	45953345	+	1760	protein_coding	hypothetical protein	-
SORBI_3010G155701	0	0	0	0	0	0	0	0	0	1.3061	0	0	0	0	0	0	0	0	0	0	-	10	45944189	45945637	+	425	protein_coding	hypothetical protein	-
SORBI_3010G155600	34.1929	57.853	72.6827	39.1309	31.7565	28.5878	38.1302	37.0967	26.6535	31.9499	28.2805	62.3964	49.5341	26.6614	27.4382	20.6281	24.1746	54.586	73.4327	71.3543	-	10	45932819	45938968	-	1573	protein_coding	hypothetical protein	DJ-1_PfpI
SORBI_3010G155500	3.79368	0.0384397	1.03257	14.0643	0.6929	1.14831	0.0280723	0.480277	0.590011	0.318539	0.273321	0	0.295929	0.44645	4.15101	1.09708	1.32501	0	0.127434	0	-	10	45927793	45932448	+	2815	protein_coding	hypothetical protein	Glyco_hydro_17
SORBI_3010G155401	0	0	0	0	0	0	0	0	0	0	0	0	0	0	0	0	0	0	0	0	-	10	45758087	45771362	-	2433	protein_coding	hypothetical protein	Pkinase
SORBI_3010G155300	5.37707	24.5774	6.22614	1.41913	0.0343654	3.57286	32.6937	22.1688	1.21321	1.28719	7.63435	4.37193	5.59979	119.366	106.529	7.0362	72.8634	0	0.559343	4.68325	-	10	45701695	45702656	+	962	protein_coding	hypothetical protein	-
SORBI_3010G155200	0	0	0	0	0	0	0	0	0	0	0	0	0	0	0	0	0	0	0	0	-	10	45666073	45667270	+	687	protein_coding	hypothetical protein	-
SORBI_3010G155100	0.439575	0	0	0	0	0	0	0	0	0	0	0.113057	0.614466	0	0	0	0	0	0.535505	0.92884	-	10	45621730	45623894	-	1898	protein_coding	hypothetical protein	NAM
SORBI_3010G155000	0.193801	0.942577	0.102301	0.206818	1.65106	0.997995	1.00959	1.7222	1.87688	1.43819	0.974846	0.548292	0.903025	0.324366	1.67479	0.982698	0.950936	0.412658	0.555518	0.45501	-	10	45614381	45615832	-	861	protein_coding	hypothetical protein	NAM
SORBI_3010G154900	6.56201	27.1533	18.7215	7.11391	8.04821	13.6393	18.572	19.5602	11.5584	14.0732	11.8868	8.15731	9.36001	22.1837	6.56466	10.5367	16.2695	7.65156	9.57273	9.10937	-	10	45611838	45618931	+	1068	protein_coding	hypothetical protein	-
SORBI_3010G154801	0.9535	2.47332	4.69768	1.80897	1.82615	1.24702	1.58047	1.41221	1.28253	1.05732	2.93104	1.38967	2.96192	1.24124	2.65194	2.25628	1.64618	1.35352	2.50538	2.98487	-	10	45606498	45607089	-	525	protein_coding	hypothetical protein	-
SORBI_3010G154700	106.379	44.5611	62.1434	85.5756	28.9525	38.5958	36.5423	39.5989	35.0435	68.1749	52.5662	79.7111	77.1712	42.6914	42.7838	35.2976	51.1374	136.416	105.729	54.4784	-	10	45603891	45608569	+	652	protein_coding	hypothetical protein	-
SORBI_3010G154600	0	2.78756	2.93949	1.11207	0.154846	1.55718	0.670866	2.01719	2.1288	1.07498	0.327612	0.427153	0.292637	0.79031	0.349348	4.85469	0.639154	0	0.105013	0.0382283	-	10	45567297	45570549	+	1708	protein_coding	hypothetical protein	Peptidase_S10
SORBI_3010G154500	8.28934	10.8126	3.0396	11.3896	9.56558	8.11528	8.52566	10.1382	7.55805	6.52554	7.08205	5.43574	7.07626	8.41968	2.41359	10.1873	8.59016	11.8568	10.9735	5.15023	-	10	45558755	45561391	-	2637	protein_coding	hypothetical protein	-
SORBI_3010G154400	0	0	0	0	0	0	0	0	0	4.58753	0.57806	2.76651	1.56052	0	0	0	0	0	0.592935	0	-	10	45534837	45535441	+	605	protein_coding	hypothetical protein	-
SORBI_3010G154300	0	0	0	0	0	0	0	0	0	0.327449	0.053639	0	0	0	0	0	0	0	0	0	-	10	45530866	45531517	+	652	protein_coding	hypothetical protein	-
SORBI_3010G154150	2.93808	0.49275	9.6264	3.13542	1.47534	6.44697	4.21026	2.74066	4.61969	8.74987	8.21761	11.4522	25.3908	0.508705	2.80772	9.51674	2.02991	70.9734	29.9482	16.9479	-	10	44899318	44900415	+	1098	protein_coding	hypothetical protein	-
SORBI_3010G154000	10.2391	8.15125	10.5333	8.4955	22.102	7.43609	8.48274	6.28312	8.55928	12.4439	12.0527	18.1445	27.5327	7.86733	9.69193	8.52477	9.50847	43.3808	30.119	21.5495	-	10	44772564	44783125	+	2124	protein_coding	hypothetical protein	zf-UBR1
SORBI_3010G153900	9.98084	45.8788	67.9876	19.9516	4.50167	10.2199	11.7039	27.0248	14.988	8.602	4.67737	2.39358	3.10778	9.86325	13.3469	13.4704	10.1562	0.110458	3.3457	3.09358	-	10	44759504	44767453	+	5361	protein_coding	Aminopropyl transferase [Source: Projected from Oryza sativa (Os06g0528600)]	-
SORBI_3010G153800	0	0	0	0	0	0	0	0	0	0	0	0.793929	3.4817	0	0	0	0	3.65158	3.50246	0.201318	-	10	44706218	44707631	+	973	protein_coding	hypothetical protein	-
SORBI_3010G153700	5.48667	11.6278	10.1518	7.70631	5.30073	14.7304	11.8669	16.3065	17.1186	10.6821	15.0916	8.37959	9.43171	10.3507	17.8669	14.9	12.2274	10.7593	9.18094	11.2438	-	10	44648956	44671503	+	2950	protein_coding	hypothetical protein	Ion_trans
SORBI_3010G153600	0	3.77098	1.27466	0.350601	0.751797	1.12385	2.1938	2.53739	0.981028	0.517033	2.92299	0.760478	1.14812	2.61188	1.58599	1.22443	1.55831	1.08429	1.21835	0.98346	-	10	44645471	44648856	-	3386	protein_coding	hypothetical protein	PPR
SORBI_3010G153532	1.12745	3.77753	3.47168	2.74057	5.06317	5.99021	4.31603	4.71484	14.053	4.51998	3.85959	3.4797	4.44038	3.3547	0.615948	5.33579	3.43197	6.13504	3.90505	4.92646	-	10	44602117	44603499	-	888	protein_coding	hypothetical protein	-
SORBI_3010G153466	1.0958	4.71433	2.51562	2.95881	3.97781	4.23623	3.89736	3.98467	9.51428	4.4602	4.71203	2.51948	3.62016	2.44334	2.25509	3.24435	2.92898	3.03794	2.44273	2.4087	-	10	44593519	44603097	-	7563	protein_coding	hypothetical protein	-
SORBI_3010G153400	7.86085	8.76244	6.99808	5.16934	11.6176	4.87637	4.64843	4.13134	5.93257	31.315	13.3585	16.4256	17.0129	3.55588	2.735	3.07028	3.05791	20.4475	22.1063	19.2041	-	10	44586819	44592377	-	1309	protein_coding	hypothetical protein	PP2C
SORBI_3010G153300	11.5267	11.1926	0.386323	3.62301	12.5061	5.24932	6.65749	4.41542	7.16972	5.57152	5.6626	6.05471	5.98799	7.0092	6.41539	9.32384	5.56943	3.07337	3.34339	4.36725	-	10	44566748	44582052	-	2736	protein_coding	hypothetical protein	DEAD
SORBI_3010G153201	0.0365206	18.3899	0.963904	0.0389735	0.0434137	0.0895552	1.67767	2.29086	0.51088	0.149527	0.130123	0.244216	0.158015	1.79299	0.0326486	0	0.338485	0.0518419	0.0654274	0.042872	-	10	44560561	44565129	-	4569	protein_coding	hypothetical protein	-
SORBI_3010G153100	61.7122	14.0359	67.1286	53.8686	26.8869	36.3632	38.9087	47.6446	29.8586	62.7458	58.0784	69.3826	51.9466	57.2013	42.5375	24.5324	89.0538	73.0371	57.6945	33.1745	-	10	44529015	44538215	+	1114	protein_coding	hypothetical protein	-
SORBI_3010G153000	0.238205	3.90043	0.817316	3.7707	4.71942	3.826	7.8967	4.38924	8.17031	10.0881	16.1758	20.5239	11.456	10.9639	4.72039	4.25769	7.72718	11.5812	9.77256	8.20253	-	10	44516453	44523115	-	1401	protein_coding	hypothetical protein	-
SORBI_3010G152900	0.0418045	0	0.430312	0.0223062	0	0	0.0296969	0.0327788	0	0.0481391	0.0657133	0.0322558	0	0.0174921	0	0	0.0341875	0	0	0	-	10	44512062	44515190	+	2661	protein_coding	hypothetical protein	Glyco_hydro_3_C
SORBI_3010G152850	0.996978	7.09476	7.52017	5.62769	16.3426	14.3598	8.29373	10.3065	20.7504	13.3335	13.0487	4.89894	4.79391	7.86022	6.26238	9.35902	5.59998	3.29601	5.18911	7.63817	-	10	44505356	44508261	+	2120	protein_coding	hypothetical protein	-
SORBI_3010G152800	0	0	0	0	0	0	0	0	0	0.0400933	0.0328381	0.241782	0.208586	0	0	0	0	0.444818	0	0.919634	-	10	44497512	44501356	-	1065	protein_coding	hypothetical protein	-
SORBI_3010G152700	0	0	0	0	1.2903	0	0	0	0	0	0	0	0.0878735	0	0	0	0	0	0	0.413253	-	10	44484308	44487797	+	1896	protein_coding	hypothetical protein	HLH
SORBI_3010G152600	1.43617	2.99358	0.649809	1.22611	3.90227	1.3433	1.95299	1.64089	2.16909	3.63834	3.19926	2.35873	3.66689	1.59676	0.641952	1.73216	1.19127	4.32492	3.81529	4.16668	-	10	44301184	44304020	-	2711	protein_coding	hypothetical protein	-
SORBI_3010G152500	4.10498	0	0	0	0	0	0	0	0	0.024056	0	0	0	0	0	0	0	0	0	0	-	10	44289185	44292435	-	1775	protein_coding	hypothetical protein	-
SORBI_3010G152400	9.63714	0	0	0	0	0	0	0	0	0	0	0	0.142766	0	0	0	0	0	0.0922174	0.402842	-	10	44214509	44218018	-	1945	protein_coding	hypothetical protein	-
SORBI_3010G152300	3.04724	0	0	0	0	0	0	0	0	0.0268888	0.0440461	0.0540508	0.0349723	0	0	0	0	0	0.0376496	0.123351	-	10	44208442	44211133	-	1588	protein_coding	hypothetical protein	-
SORBI_3010G152250	0	0	0	0	0	0	0	0	0	0	0	0	0	0	0	0	0	0	0	0	-	10	44126217	44128241	-	2025	protein_coding	hypothetical protein	-
SORBI_3010G152200	0.200436	0.974846	0.634822	0	0.0595668	0.368629	0.569538	3.22181	0.161761	0.307743	0.252055	0	4.40286	0.838676	0.0895924	0.68603	0.32783	30.7285	2.36996	2.94117	-	10	44095111	44095671	-	555	protein_coding	hypothetical protein	-
SORBI_3010G152100	10.2582	12.5823	13.713	20.1498	8.95897	25.8644	20.0877	14.8614	41.3364	17.4052	10.9685	12.2539	19.7677	16.3123	22.244	25.0743	24.6385	34.4664	27.8275	31.4449	-	10	44086850	44089945	-	3096	protein_coding	hypothetical protein	-
SORBI_3010G152000	2.49802	2.84349	1.0521	7.99741	6.93413	11.2216	2.41639	1.77116	4.91137	12.1386	10.2762	21.1198	26.7199	1.04524	2.63705	3.69892	0.912772	45.3248	42.1055	41.1168	-	10	44081155	44086248	+	2093	protein_coding	hypothetical protein	-
SORBI_3010G151900	7.94724	9.48352	5.53629	10.0784	11.5954	7.28812	7.87715	9.61354	7.61391	8.08929	9.53573	5.80525	9.53788	7.59018	4.8861	7.93971	7.94886	9.0586	7.71692	8.04614	-	10	44071190	44078758	+	5648	protein_coding	hypothetical protein	-
SORBI_3010G151801	0	0	0	0	0	0	0	0	0	0	0	0	0	0	0	0	0	0	0	0	-	10	44052483	44053926	+	361	protein_coding	hypothetical protein	-
SORBI_3010G151700	4.06434	0.185057	0.246497	1.1074	13.0552	6.60334	1.65861	1.72225	1.8564	4.63373	9.63486	15.6933	4.3517	1.5776	8.16361	2.2889	1.47096	2.94609	3.16041	3.99966	-	10	44032883	44039100	+	3216	protein_coding	hypothetical protein	-
SORBI_3010G151575	0	0	0	0	0	0	0	0	0	32.3432	0	0	0	0	0	0	0	0	0.0334632	0	-	10	44006475	44012234	+	5360	protein_coding	hypothetical protein	-
SORBI_3010G151450	0	0	0	0	0	0	0	0	0	0	0	0	0	0	0	0	0	0	0	0	-	10	43952504	43953492	-	380	protein_coding	hypothetical protein	-
SORBI_3010G151325	0	0	0	0	0	0	0	0.0788363	0	0	0	0	0	0	0.0539304	0	0	0	0	0	-	10	43771550	43774815	-	2766	protein_coding	hypothetical protein	FAR1
SORBI_3010G151200	5.78744	0.199278	0.324426	2.40488	8.70629	0.30142	0.800421	0.361427	1.81869	0.904314	0.322031	0.316142	0.102276	0.900071	1.87723	0.506415	1.21465	0	0.165159	0.420864	-	10	43755649	43756814	-	1086	protein_coding	hypothetical protein	-
SORBI_3010G151100	0	0	0	0	0.0567059	0	0	0	0	0.0366204	0	0	0	0	0	0	0	0	0	0.0279991	-	10	43738127	43740926	-	2332	protein_coding	hypothetical protein	-
SORBI_3010G151050	0	0	0	0	0.0680238	0	0	0	0	0	0	0	0	0	0	0	0.0311978	0	0	0	-	10	43735854	43738126	-	1458	protein_coding	hypothetical protein	-
SORBI_3010G151000	2.92966	2.36558	0.878338	2.67113	3.76157	2.25984	2.45496	1.61692	1.74459	2.27089	2.65581	2.05199	2.07319	1.85662	2.31392	2.54199	1.5701	2.99792	2.73638	2.35399	-	10	43625333	43633284	-	3911	protein_coding	hypothetical protein	-
SORBI_3010G150900	0.520244	0.0440048	0.394021	0.482771	0.215109	0	0.0160682	0.0177358	0.146039	26.6893	14.3645	112.116	25.6563	0.113574	0.121327	0.0688169	0	23.937	86.3382	40.4138	-	10	43624162	43626620	-	2459	protein_coding	hypothetical protein	-
SORBI_3010G150800	0.306874	18.358	18.8312	0.900584	0.0911988	2.76548	8.82882	55.1018	1.23831	1.64908	0.289428	3.67008	2.22144	44.0426	7.13279	0.933631	19.0102	0	15.9159	5.67382	-	10	43592744	43593468	-	725	protein_coding	hypothetical protein	-
SORBI_3010G150701	0	0	0	0	0	0	0	0	0	0.412373	0	0	0	0	0	0	0	0	0	0	-	10	43516457	43518915	+	2278	protein_coding	hypothetical protein	-
SORBI_3010G150700	0.0147028	0.0715093	0.046567	0.0313808	0.908854	0.0108162	0.0313336	0.0345854	0.0118659	0.191882	0.166404	0.0567226	0.117443	0.0123041	0.052576	0.0335489	0.0360717	0	0.0316086	0.0862992	-	10	43385894	43391519	-	3783	protein_coding	hypothetical protein	-
SORBI_3010G150600	0.0368716	0.215196	0	0	0.876621	0.0542496	0.0130964	0	0.0446357	0.254753	0.220245	0.0426745	0.0920385	0	0.0164812	0.0280445	0.0301534	0	0.0396338	0.021642	-	10	43384079	43387095	+	3017	protein_coding	hypothetical protein	-
SORBI_3010G150575	31.3499	30.9868	10.0093	51.1727	31.9075	32.4242	33.5251	36.4096	65.6327	22.7083	25.3816	43.8917	55.536	40.9751	58.6138	52.6251	49.4148	69.6242	63.1393	34.9224	-	10	43378469	43381792	+	660	protein_coding	hypothetical protein	-
SORBI_3010G150450	12.5899	7.67691	1.78544	14.2376	14.0726	5.29904	5.76212	6.85125	7.98695	6.27507	11.6378	8.84424	10.8821	8.67506	5.8795	9.05178	9.50196	18.4051	14.1053	10.4779	-	10	43373664	43376946	-	1776	protein_coding	hypothetical protein	-
SORBI_3010G150325	0.361435	1.6407	0.254387	2.09998	0.644482	0.679501	0.484981	1.19658	0.842675	0.339128	0.883784	0.371838	0.721768	2.18449	1.75918	1.46617	2.75875	0.256533	0.647519	0.660012	-	10	43371492	43382976	+	1385	protein_coding	hypothetical protein	-
SORBI_3010G150200	1.14646	0.168969	0.275083	0.667346	0.412986	0.562268	0.172756	0.0544813	2.52341	0.240034	0.677171	1.68877	1.90786	0.0290734	0.590101	0.528484	0.198879	3.32884	1.49376	2.07995	-	10	43268793	43270786	-	1601	protein_coding	hypothetical protein	-
SORBI_3010G150100	5.89543	7.45782	37.9776	14.7172	8.47434	11.2664	6.30563	6.11617	11.6757	33.8524	9.46177	6.12145	7.16073	12.3061	9.59567	9.67803	9.31538	6.83422	4.66835	5.16538	-	10	43260824	43266663	+	5840	protein_coding	hypothetical protein	-
SORBI_3010G150000	1.04594	3.77574	6.29417	2.10837	4.35176	2.97522	3.38483	3.40806	3.90173	4.81773	2.68908	1.23745	0.881893	4.45431	2.59736	3.55342	4.35286	0	1.17427	1.96455	-	10	43252118	43254510	+	2393	protein_coding	hypothetical protein	-
SORBI_3010G149900	0	0.0858793	0	0	0	0	0	0.138452	0	0	0	0	0	0	0.0789267	0	0.216602	0	0	0.103641	-	10	43248861	43249490	+	630	protein_coding	hypothetical protein	-
SORBI_3010G149800	0	0.0327308	0.106572	0	0	0	0	0.0263837	0	0.878269	0	0	0	0.0422382	0	0	0.0137588	0	0	0	-	10	43192092	43195746	+	3306	protein_coding	hypothetical protein	-
SORBI_3010G149700	1.33977	0	0	0	0.0723932	0	0	0	0	0	0	0.0313258	0	0	0	0	0	0	0	0	-	10	43190204	43191671	-	1370	protein_coding	hypothetical protein	-
SORBI_3010G149600	2.34546	1.02792	0.999999	2.39297	7.88956	3.42246	2.16966	2.7485	1.82009	3.30435	4.90232	6.01584	4.7095	1.85496	1.72812	1.58791	1.46493	6.09177	4.21117	3.0408	-	10	43036399	43042747	-	4316	protein_coding	hypothetical protein	-
SORBI_3010G149500	14.6911	19.7946	25.4222	24.1318	14.188	10.7768	14.2177	16.104	11.0446	20.1591	15.2593	16.316	22.3274	16.8543	20.6464	12.9593	16.1448	41.4113	21.5136	19.8539	-	10	43024057	43031942	-	2654	protein_coding	hypothetical protein	BTB
SORBI_3010G149300	239.677	204.694	775.862	208.023	109.354	170.968	146.773	165.692	128.262	35.4794	116.56	155.338	65.4401	170.138	211.441	134.069	193.783	125.16	272.717	181.995	-	10	42980290	42982321	-	757	protein_coding	hypothetical protein	UQ_con
SORBI_3010G149200	7.53233	26.0121	39.8477	10.5656	5.80644	13.8651	16.2393	18.6983	9.50334	15.0748	8.5415	11.9536	14.6147	23.3421	18.9368	11.6083	18.1031	21.2213	18.1732	16.2173	-	10	42972457	42976966	+	1691	protein_coding	hypothetical protein	-
SORBI_3010G149000	0	0	0	0	0	0.0728723	0	0	0	0	0	0	0	0	0	0	0	0	0	0	-	10	42902409	42903531	+	1123	protein_coding	hypothetical protein	-
SORBI_3010G148932	17.8243	6.23774	8.1916	17.9006	18.7899	11.9622	9.90177	11.1461	9.91082	14.8232	12.7864	10.822	9.17058	8.162	10.5406	14.32	7.76299	5.54918	4.70287	6.83255	-	10	42870988	42944868	-	7043	protein_coding	hypothetical protein	-
SORBI_3010G148866	0	0.0192746	0	0	0	0	0	0.015537	0	0.0456352	0	0	0	0.0165823	0	0	0	0	0	0	-	10	42867187	42870476	-	2807	protein_coding	hypothetical protein	-
SORBI_3010G148800	0.237569	0	0	0	0	0	0	0	0	0	0	0	0	0	0	0	0	0	0	0	-	10	42829856	42831874	-	1873	protein_coding	hypothetical protein	WRKY
SORBI_3010G148750	0	0	0	0	0	0	0	0	0	0	0	0	0.182085	0	0	0	0	0	0	0	-	10	42788559	42789294	+	305	protein_coding	hypothetical protein	-
SORBI_3010G148700	0	0	0	0	0	0	0	0	0	0	0	0.121232	0.313763	0	0	0	0	0	0.0844458	0.184446	-	10	42591903	42595057	+	708	protein_coding	hypothetical protein	-
SORBI_3010G148600	0	0	0	0	0	0	0	0	0	0	0	0.148243	0.527544	0	0	0	0	0.306821	0.774451	0.789392	-	10	42567454	42569300	-	1158	protein_coding	hypothetical protein	WRKY
SORBI_3010G148501	0.077055	0.187384	0.386412	0.315217	1.19079	0.255087	0.27369	0.352443	0.590777	1.12393	1.25162	0.545	0.551385	0.204199	0.172214	0.713063	0.189046	0.109382	0.455551	0.648266	-	10	42432435	42437197	+	4331	protein_coding	hypothetical protein	-
SORBI_3010G148400	0.895306	1.85064	2.12672	1.85116	1.33036	1.77008	1.31176	1.66727	1.76123	1.2028	1.61845	0.733981	0.838069	1.358	1.85089	1.6173	2.4711	0.714886	1.56386	1.1167	-	10	42383359	42384352	-	994	protein_coding	hypothetical protein	SRF-TF
SORBI_3010G148200	0	0	0	0	0	0	0	0	0	0	0	0	0	0	0	0	0	0	0	0	-	10	42377237	42377661	-	408	protein_coding	hypothetical protein	-
SORBI_3010G148100	0	0.20163	0.218836	0	0.205339	0	0	0.16253	0.167287	0.371299	0.30411	0.319873	0.0689889	0.346931	0	0.157659	0.0565049	0	0	0	-	10	42374651	42375455	+	805	protein_coding	hypothetical protein	SRF-TF
SORBI_3010G147966	1.30283	0.487423	0.634822	0.374321	1.19134	0.737257	1.03229	0.589355	0.889685	0.846293	1.8589	0.193317	0.300195	0.419338	1.11991	0.990932	0.614682	0.426785	0.377039	0.117647	-	10	42371882	42372991	+	1110	protein_coding	hypothetical protein	-
SORBI_3010G147833	7.82139	4.63301	4.04869	6.37625	4.80078	5.91406	5.1189	5.36058	6.25874	6.2806	5.94189	4.64671	4.11273	6.25216	9.24385	7.78548	6.82219	3.44774	1.82192	3.17911	-	10	42331511	42374634	+	5874	protein_coding	hypothetical protein	-
SORBI_3010G147700	12.1913	0.0321378	0.0261602	2.46805	12.0377	0.255204	0.152555	0.0388586	0.0933236	3.06898	3.12645	8.41246	4.50292	0.483852	0.339664	0.226164	0.324228	3.13054	3.85325	1.47382	-	10	42293817	42299857	+	3367	protein_coding	hypothetical protein	-
SORBI_3010G147600	19.3409	56.5222	75.7368	76.5791	57.754	123.001	64.865	63.2378	130.755	90.9949	49.412	35.9261	53.5165	30.89	76.6198	71.1176	34.6317	24.9427	125.871	229.37	-	10	42282829	42286943	-	1320	protein_coding	hypothetical protein	-
SORBI_3010G147500	1.28446	1.77949	0.0616386	1.66149	3.84037	1.08809	1.76959	2.74675	0.973792	1.2251	4.13602	2.1323	3.07022	1.72636	0.869905	0.680909	1.78253	0.911659	2.63584	3.15275	-	10	42254853	42257063	-	1429	protein_coding	hypothetical protein	-
SORBI_3010G147400	0	0	0	0	0.0408143	0	0	0	0	0	0	0	0	0	0	0	0	0	0	0	-	10	42245661	42246485	+	810	protein_coding	hypothetical protein	CAF1
SORBI_3010G147350	0	0	0	0	0	0	0	0	0	0	0	0	0	0	0	0	0	0	0	0	-	10	42220358	42221810	+	612	protein_coding	hypothetical protein	CAF1
SORBI_3010G147300	0	0	0	0	0	0	0	0	0	0	0	0	0	0	0	0	0	0	0	0	-	10	42217039	42219620	+	906	protein_coding	hypothetical protein	-
SORBI_3010G147250	0	0	0	0	0	0	0	0	0	0	0	0	0	0	0	0	0	0	0	0	-	10	42208651	42209207	+	492	protein_coding	hypothetical protein	CAF1
SORBI_3010G147200	65.1951	0.0230524	0	0.0758714	0	0.0174341	0	0	0	0	0	0	0	0	0	0	0	0	0	0.0278202	-	10	42040799	42043406	-	2347	protein_coding	hypothetical protein	-
SORBI_3010G147100	23.0454	25.9775	69.1138	25.0787	13.6203	16.5392	18.5865	21.942	19.4378	16.9268	15.3618	16.5783	15.8087	34.6199	28.6377	25.6665	36.1518	19.6466	12.9447	17.8745	-	10	42005494	42012857	+	2568	protein_coding	hypothetical protein	-
SORBI_3010G147000	1.49461	2.98558	2.5782	1.79437	2.83957	3.10221	3.24208	2.78332	2.62784	3.79049	1.94665	1.23559	1.97201	3.77465	3.913	2.6796	2.57553	3.18246	2.00822	1.78587	-	10	41921555	41927514	-	2084	protein_coding	hypothetical protein	-
SORBI_3010G146900	0	0	0	0	0	0	0	0	0	0	0	0.189059	0	0	0	0	0	0	0	0	-	10	41917056	41917364	+	227	protein_coding	hypothetical protein	-
SORBI_3010G146800	0	0	0	0	0	0	0	0	0	0	0	0.0221904	0	0	0	0	0	0	0	0	-	10	41914699	41916632	+	1934	protein_coding	hypothetical protein	-
SORBI_3010G146700	58.3512	29.0881	12.4772	7.99193	4.76033	42.6968	48.0827	10.2149	100.018	46.8715	4.30004	5.67803	3.50508	15.9507	13.0179	27.0959	25.008	0	1.67707	0.885239	-	10	41902661	41909970	-	2139	protein_coding	hypothetical protein	Aa_trans
SORBI_3010G146600	8.60618	7.09948	7.8498	10.7095	11.2247	15.5483	12.7673	10.9448	21.8921	7.33056	10.574	5.46719	5.49591	14.4806	25.5823	17.4402	14.5736	4.85646	7.91066	7.17556	-	10	41891234	41896820	+	1829	protein_coding	AT4G28980 protein [Source:Projected from Arabidopsis thaliana (AT4G28980) UniProtKB/TrEMBL;Acc:B9DFZ7]	Pkinase
SORBI_3010G146500	0.0691587	0.0336363	0.02738	1.78974	0.565208	0.457892	0.0122822	0.067784	0.251164	0.13273	0.141325	0.160086	1.45012	0.0144689	0.0927394	0.0657525	0.0141394	0.0368147	0.669056	2.74003	-	10	41743477	41746939	-	3217	protein_coding	hypothetical protein	NB-ARC
SORBI_3010G146400	0.327594	1.84368	1.40812	0.424511	1.50207	2.10011	5.58516	3.02735	8.5736	1.25745	1.91268	4.44148	3.97187	5.8942	1.94544	3.59514	7.38653	6.72631	4.9802	4.31265	-	10	41660035	41665277	-	2377	protein_coding	hypothetical protein	-
SORBI_3010G146350	0	0	0	0	0	0	0	0	0	0.673188	0	0	0	0	0	0	0	0	0	0	-	10	41598664	41601835	-	444	protein_coding	hypothetical protein	-
SORBI_3010G146300	1.41372	0	0	0	0	0	0	0	0	0	0	0	0	0	0	0	0	0	0	0	-	10	41443475	41445067	-	1259	protein_coding	hypothetical protein	-
SORBI_3010G146200	0	0	0	0	0	0	0	0	0	0	0	0	0	0	0	0	0	0	0	0	-	10	41439713	41441774	+	753	protein_coding	hypothetical protein	-
SORBI_3010G146100	142.945	197.232	23.5524	25.6234	0.637359	55.666	64.9476	62.3293	119.39	125.127	5.62845	0.143894	0	24.3852	2.70918	4.11349	12.6966	0	0	0	-	10	41392271	41394011	-	1193	protein_coding	hypothetical protein	-
SORBI_3010G146000	0	0	0	0	0.135405	0	0	0	0	43.6141	0	0	0.0174972	0	0	0	0.0716548	0	0	0	-	10	41350269	41353669	-	3174	protein_coding	Cellulose synthase-like protein D1 [Source:Projected from Arabidopsis thaliana (AT2G33100) UniProtKB/Swiss-Prot;Acc:O49323]	-
SORBI_3010G145900	75.2326	50.9069	112.733	46.252	25.4816	41.7149	29.0693	25.9833	25.7818	53.1247	40.0028	41.1188	30.3284	35.3028	62.7682	35.3825	30.3489	35.1453	28.6126	37.9468	-	10	41297948	41301127	+	3080	protein_coding	hypothetical protein	PI3_PI4_kinase
SORBI_3010G145800	8.92581	11.609	10.6092	7.32059	9.51371	10.0192	7.79405	7.675	11.4447	8.65382	8.41209	10.1216	8.79204	8.71174	11.0816	9.56558	7.64396	11.8732	8.90454	10.1956	-	10	41279629	41293580	+	2773	protein_coding	hypothetical protein	KH_1
SORBI_3010G145650	0	0	0.0434113	0	0	0	0	0	0	0.0631336	0	0	0.0273711	0	0	0.0208503	0	0	0	0	-	10	41234325	41237060	+	2029	protein_coding	hypothetical protein	-
SORBI_3010G145500	0.0543172	0.0528359	0.60212	0	0.0484271	0.0199794	0.0385856	0.106475	0.0219183	0.0208493	0.409835	0.167642	6.29119	0.0454556	0.0242792	0	0.0888407	9.77302	8.43682	0.159409	-	10	41203393	41206999	+	2048	protein_coding	hypothetical protein	-
SORBI_3010G145300	0	0	0	0	0	0	0	0	0	0	0	0	0	0	0	0	0	0	0	0	-	10	40912089	40913686	+	1389	protein_coding	hypothetical protein	-
SORBI_3010G145200	0.532696	0.107207	0	1.19576	2.23818	0.0675657	0.417561	0.115224	0.355789	0.225624	0.138597	0.0283463	0.0733633	0.015372	0.0656853	0.363254	0.135198	0	0.0592347	0.388141	-	10	40906159	40909186	+	3028	protein_coding	hypothetical protein	-
SORBI_3010G145100	0.0555098	1.45789	0.263717	0	0.0329936	0.163344	0.591492	0.217626	0.671986	4.94324	0	0.385476	1.05308	0.0929072	0.0496245	0.211104	0.0907913	0.354589	0.716019	0.130327	-	10	40818400	40820457	-	1002	protein_coding	hypothetical protein	-
SORBI_3010G145000	0	0.154583	0.125831	0.169591	0	0	0	0	0.0641267	7.74688	0.0999217	0	0.158674	0	0	0	0	0	0.0854108	0.279831	-	10	40786231	40788312	-	700	protein_coding	hypothetical protein	-
SORBI_3010G144900	14.4243	4.14549	3.28792	20.5824	25.2331	6.23011	5.23976	4.584	9.56861	9.01804	10.3406	4.00496	6.49193	3.24637	5.47059	3.94793	2.72561	0	10.9239	10.9037	-	10	40200841	40209487	+	1018	protein_coding	hypothetical protein	-
SORBI_3010G144800	0	0	0	0	0	0	0	0	0	0	0	0	0	0	0	0	0	0	0	0	-	10	40147020	40148582	-	1563	protein_coding	hypothetical protein	-
SORBI_3010G144700	0	0	0	0	0	0	0	0	0	10.9502	0	0	0	0	0	0	0	0	0	0	-	10	39941679	39950526	+	7986	protein_coding	hypothetical protein	-
SORBI_3010G144600	0	0	0	0	0	0	0	0	0	24.6743	1.96844	0	0	0	0	0	0	0	0	0	-	10	39547995	39548646	-	533	protein_coding	hypothetical protein	-
SORBI_3010G144500	0	0.0421699	0	0	0	0.0318923	0.092389	0	0	0	0	0	0	0.0362794	0	0.0329736	0	0	0	0	-	10	39420768	39422050	+	1283	protein_coding	hypothetical protein	-
SORBI_3010G144450	0	0	0	0	0	0	0	0	0	0.15527	0	0	0	0	0	0	0	0	0	0	-	10	38923747	38924574	+	275	protein_coding	hypothetical protein	-
SORBI_3010G144400	100.379	11.9086	5.69526	31.2556	1.21521	47.1696	23.518	15.9731	35.3066	17.4731	36.2272	47.5158	31.5311	11.9562	62.1217	36.8718	25.1001	52.2405	29.4172	25.1286	-	10	38889320	38892694	+	2258	protein_coding	hypothetical protein	-
SORBI_3010G144250	0	0	0	0	0	0.0811861	0	0	0.17813	1.10137	0.0693901	0	0.220381	0	0	0	0	0	0.237252	0	-	10	38860748	38861429	-	504	protein_coding	hypothetical protein	-
SORBI_3010G144100	0.287604	1.06547	0.353702	0.231824	0.821988	1.11191	1.13021	0.791685	1.2371	0.537882	0.642546	0.290374	0.219957	0.39431	0.456784	0.595749	0.482914	0.104237	0.174308	0.140077	-	10	38841098	38860603	+	18179	protein_coding	hypothetical protein	-
SORBI_3010G144050	0	0	0	0	0	0	0	0	0	0	0	0	0	0	0	0	0	0	0	0	-	10	38838752	38840475	+	1494	protein_coding	hypothetical protein	-
SORBI_3010G144000	0	0	0	0	0	0	0	0	0	0	0	0	0	0	0	0	0	0	0	0	-	10	38823095	38826185	+	2103	protein_coding	hypothetical protein	-
SORBI_3010G143900	29.5856	11.9719	9.1205	7.11438	0.187572	19.211	22.1097	21.9917	16.2841	9.11525	11.6327	2.66325	2.30415	13.4688	57.9406	55.3868	30.8082	0.0419975	0.869252	3.07947	-	10	38788008	38791103	+	2820	protein_coding	hypothetical protein	-
SORBI_3010G143800	0.634348	1.02841	0.592727	0.918168	0.754078	1.01378	0.759674	0.830891	0.874824	0.679159	0.748813	0.703238	0.689195	0.616281	0.962536	0.800443	0.604234	0.652066	0.540792	0.790318	-	10	38390600	38413484	-	22885	protein_coding	hypothetical protein	-
SORBI_3010G143700	0	0	0	0	0	0	0	0	0	0	0	0	0	0	0	0	0	0	0	0	-	10	38407598	38410467	+	2870	protein_coding	hypothetical protein	-
SORBI_3010G143666	0	0	0	0	0	0	0	0	0	0	0.168195	1.32685	2.84262	0	0	0	0	4.71941	2.79324	1.00935	-	10	38137489	38140399	+	2911	protein_coding	hypothetical protein	-
SORBI_3010G143633	0	0	0	0	0	0	0	0	0	2.50774	0	1.70303	0.440762	0	0	0	0	1.31592	0	0.414565	-	10	38125861	38127781	+	630	protein_coding	hypothetical protein	-
SORBI_3010G143600	0.740377	4.59118	0.376864	2.61017	9.11554	5.16457	3.45622	2.74715	5.72979	6.29275	5.32029	4.60073	4.5543	1.37194	2.61207	6.75756	0.875779	5.34876	4.2208	5.09067	-	10	38101564	38120023	-	4207	protein_coding	hypothetical protein	-
SORBI_3010G143500	10.0745	119.029	8.05415	5.55459	12.5935	12.8485	49.1436	72.1469	17.5013	155.338	14.683	24.823	21.7714	45.0161	18.6996	29.0704	25.8317	4.00921	11.341	20.1979	-	10	38070890	38083747	-	5140	protein_coding	Alpha-glucan water dikinase 1, chloroplastic [Source:Projected from Arabidopsis thaliana (AT1G10760) UniProtKB/Swiss-Prot;Acc:Q9SAC6]	-
SORBI_3010G143400	0	114.659	0	0	0	1.46367	87.7235	159.438	3.85372	2.10442	0	0.0682294	0.132439	26.4183	10.7116	5.98595	18.0427	0	0	0	-	10	38067227	38068963	-	1258	protein_coding	hypothetical protein	DnaJ
SORBI_3010G143300	4.50079	2.13497	0.659952	0.474379	1.3706	0	0.217097	0.392118	0.201797	0.341254	3.07451	0.364424	1.19283	0.53475	0	0	0.295367	0	0.597279	0.717516	-	10	38000519	38004812	-	2002	protein_coding	hypothetical protein	-
SORBI_3010G143200	7.22349	18.5157	13.4178	14.2089	18.0557	13.8451	15.5745	22.9159	14.4955	12.3047	16.5595	9.00805	7.52436	13.5114	7.6968	14.6115	12.9323	5.15468	5.51918	7.72344	-	10	37982067	37984915	-	2849	protein_coding	hypothetical protein	-
SORBI_3010G143100	7.03015	27.1525	18.2275	18.3145	18.2708	16.5294	19.2907	26.2646	17.8553	16.3496	24.7018	12.0719	8.18933	18.2841	8.93426	15.9365	16.2895	8.07163	10.0757	7.44368	-	10	37980992	37981896	-	807	protein_coding	hypothetical protein	-
SORBI_3010G143000	15.8255	49.8529	30.3042	46.2841	26.6444	33.2213	25.2593	25.7001	39.2776	28.8221	25.2302	11.7509	16.8592	29.8119	13.1413	31.7792	27.8334	11.4203	13.3099	16.5567	-	10	37927658	37930488	-	840	protein_coding	hypothetical protein	-
SORBI_3010G142900	0	0.0553965	0	0.0405165	0	0	0	0	0	0	0	0.336886	11.4105	0.0794309	0	0.0288772	0	3.19324	60.5018	224.072	-	10	37888679	37891608	+	2930	protein_coding	hypothetical protein	-
SORBI_3010G142700	3.62701	3.17331	0.673848	6.68168	6.67213	3.3241	2.6629	2.2243	4.93857	2.30219	2.58632	2.40769	4.22843	2.64527	1.86577	4.51563	3.94382	5.00481	4.16008	4.01992	-	10	37669206	37672040	-	2745	protein_coding	hypothetical protein	-
SORBI_3010G142650	0	0	0	0	0	0	0	0	0	0.147783	0.00806936	0	0	0	0	0	0	0	0	0	-	10	37148319	37152822	+	4334	protein_coding	hypothetical protein	-
SORBI_3010G142600	0	0	0	0	0	0	0	0	0	0.489536	0	0	0	0	0	0	0	0	0	0	-	10	37013049	37018276	+	5059	protein_coding	hypothetical protein	-
SORBI_3010G142501	5.94009	23.2875	27.9352	14.7912	26.9077	19.4657	22.6329	20.5359	27.1656	20.2442	18.7879	9.79158	13.2999	18.1516	4.42526	19.715	17.3702	21.8468	16.2529	19.1233	-	10	36983780	36985193	-	618	protein_coding	hypothetical protein	-
SORBI_3010G142401	0	0	0	0.0521282	0	0	0	0	0	1.27498	0	0	0	0	0	0	0	0	0	0	-	10	36831057	36834569	+	3416	protein_coding	hypothetical protein	-
SORBI_3010G142300	0	0	0	0	0	0	0	0	0	0	0.121012	3.56398	4.80416	0	0	0	0	6.69344	9.24053	4.66924	-	10	36111887	36113107	+	867	protein_coding	hypothetical protein	-
SORBI_3010G142132	0	0	0	0	0	0	0	0	0	0	0.16216	0.862306	1.63089	0	0	0	0	3.11184	2.495	0.908263	-	10	35814079	35816161	+	647	protein_coding	hypothetical protein	-
SORBI_3010G141966	1.66764	7.91998	6.52456	3.45462	10.7283	5.91756	5.50516	4.61505	6.17516	5.19622	3.45408	3.40606	3.72199	4.67928	4.6479	4.55135	3.36937	0.626629	1.1599	2.99408	-	10	35395948	35396742	-	567	protein_coding	hypothetical protein	-
SORBI_3010G141800	2.02527	10.3067	5.47576	4.63889	12.4047	7.12245	5.33373	5.42248	7.19574	6.21909	7.39208	3.56365	4.11835	5.97333	2.47294	5.93625	5.43333	2.31396	3.29203	3.94315	-	10	35392576	35395782	-	2252	protein_coding	hypothetical protein	Peptidase_C48
SORBI_3010G141700	0	0	0	0	0	0	0	0	0	0	0	0	0	0	0	0	0	0	0	0	-	10	35388586	35391931	+	1989	protein_coding	hypothetical protein	-
SORBI_3010G141600	12.8031	13.2556	8.83244	13.929	21.1435	15.538	19.715	15.8699	25.043	12.5508	15.6666	45.4747	41.3171	12.4306	35.5023	38.5149	16.8654	60.1959	43.9033	35.0545	-	10	35334842	35356397	-	2902	protein_coding	hypothetical protein	2-Hacid_dh_C
SORBI_3010G141500	0.813926	0.883081	1.15261	0.98552	1.14432	1.49116	1.18418	1.63845	1.13059	1.59214	1.17609	1.16545	1.23466	1.14614	1.03548	0.958369	0.844831	1.31648	1.36282	1.13922	-	10	35248927	35306315	+	7107	protein_coding	hypothetical protein	Peptidase_C48
SORBI_3010G141466	0	0	0	0	0	0	0	0	0	0	0	0	0	0	0	0	0	0	0	0	-	10	34922559	34924496	+	1938	protein_coding	hypothetical protein	-
SORBI_3010G141433	0	0.0260993	0.0212449	0	0.0318954	0.0394769	0.152481	0.0210382	0.292329	0.0205979	0	0.0103513	0.160741	0	0	0	0.0109712	0.342787	0.0288411	0	-	10	34858274	34864380	+	4146	protein_coding	hypothetical protein	-
SORBI_3010G141400	0	0	0	0	0	0	0	0	0	0	0	0	0	0	0	0	0	0	0	0	-	10	34395148	34414051	-	792	protein_coding	hypothetical protein	Toprim
SORBI_3010G141201	0	0	0	0	0	0	0	0	0	4.34021	0	0	0	0	0	0	0	0	0	0	-	10	33919080	33920871	-	1033	protein_coding	hypothetical protein	-
SORBI_3010G141001	0	0	0	0	0	0	0	0	0	0.489716	0	0	0	0	0	0	0	0	0	0	-	10	33907792	33918776	-	10899	protein_coding	hypothetical protein	-
SORBI_3010G140800	0	0	0	0	0	0	0	0	0	8.87216	0.13608	1.33592	2.85243	0	0	0	0	4.23962	0.604855	0.660562	-	10	32680719	32683021	+	1285	protein_coding	hypothetical protein	-
SORBI_3010G140750	0	0	0	0	0	0	0	0	0	0	0	0	0	0	0	0	0	0	0	0	-	10	32286029	32287859	+	1683	protein_coding	hypothetical protein	-
SORBI_3010G140700	0	0	0	0	0	0	0	0	0	161.54	0.0236942	0	0	0	0	0	0	0	0	0	-	10	28583026	28584622	-	1476	protein_coding	hypothetical protein	-
SORBI_3010G140600	16.1458	87.0454	156.77	16.4271	20.1285	21.692	42.4763	53.2681	18.1653	25.8927	26.4123	35.3149	27.4606	73.7416	21.1617	19.7216	37.0382	29.7175	36.0343	17.6687	-	10	27920444	27926002	-	813	protein_coding	Protein BOLA4, chloroplastic/mitochondrial [Source:Projected from Arabidopsis thaliana (AT5G17560) UniProtKB/Swiss-Prot;Acc:Q9LF68]	-
SORBI_3010G140575	0	0	0	0	0	0	0	0	0	0	0	0	0	0	0	0	0	0	0	0	-	10	27296735	27298668	+	1818	protein_coding	hypothetical protein	-
SORBI_3010G140550	0	0	0	0	0	0	0	0	0	0	0	0	0	0	0	0	0	0	0	0	-	10	27225026	27226982	+	1848	protein_coding	hypothetical protein	-
SORBI_3010G140525	0.0233309	0	0	0	0.346682	0	0	0	0	0.0537324	0	0	0.0465906	0	0	0	0	0	0	0	-	10	27197807	27200668	-	2384	protein_coding	hypothetical protein	-
SORBI_3010G140500	0.221419	0.61226	0.87857	1.662	0.592963	0.812609	1.15052	1.34405	1.10831	0.555777	0.1095	0.042231	0.0521652	1.0618	4.07674	4.45816	2.7263	0	0.104295	0.102218	-	10	27155811	27185775	+	22357	protein_coding	hypothetical protein	U-box
SORBI_3010G140400	7.23115	9.60525	5.18941	6.22476	7.9078	7.39284	7.65093	8.47921	7.52846	8.31849	7.5687	5.0232	4.40624	8.35497	5.3122	5.96526	6.07439	2.46541	4.53221	4.23154	-	10	25838150	25848329	-	2546	protein_coding	hypothetical protein	-
SORBI_3010G140300	0	0	0	0	0	0	0	0	0	0	0	0	0.0916436	0	0	0	0	0	0	0	-	10	25835412	25836017	-	606	protein_coding	hypothetical protein	-
SORBI_3010G140200	0	0	0	0	0	0	0	0	0	0	0	0	0	0	0	0	0	0	0	0	-	10	25831129	25831956	-	741	protein_coding	hypothetical protein	-
SORBI_3010G140150	0	0	0	0	0	0	0	0	0	0	0	0	0	0	0	0	0	0	0	0	-	10	25475463	25477342	+	1791	protein_coding	hypothetical protein	-
SORBI_3010G140100	0	0	0	0	0	0	0	0	0	14.0172	0.0568352	0.209234	1.65465	0	0	0	0	0.192469	2.26714	0.247594	-	10	25357014	25359626	+	1846	protein_coding	hypothetical protein	-
SORBI_3010G139600	12.4536	7.63454	22.1948	13.0593	9.35854	11.2708	8.93778	8.35823	10.0183	7.00282	7.69448	6.5564	8.69225	10.0935	11.706	13.5779	11.1931	8.3389	5.89698	6.07342	-	10	24374770	24413721	-	6945	protein_coding	hypothetical protein	Pkinase
SORBI_3010G139550	0	0	0	0	0	0	0	0	0	0	0	0	0	0	0	0	0	0	0	0	-	10	24112635	24115120	-	1401	protein_coding	hypothetical protein	Transposase_28
SORBI_3010G139500	12.2771	4.86112	7.41543	23.1905	12.0217	11.1883	9.34332	10.3515	15.7595	12.9367	10.7441	7.83333	9.09557	8.82524	10.826	9.52502	8.37485	6.93337	6.32348	8.55728	-	10	24015424	24022720	-	5654	protein_coding	hypothetical protein	E1-E2_ATPase
SORBI_3010G139400	0.521772	0	0	2.89545	1.05443	0	0	0	0.252657	0.56078	0.459302	0.644147	1.25034	0.0873293	0	0	0	0.2222	0.560859	0.490011	-	10	24014122	24014654	+	533	protein_coding	hypothetical protein	-
SORBI_3010G139301	4.20853	4.22284	5.97417	10.6818	15.6058	10.1388	9.25172	11.6983	8.736	11.5699	16.5446	5.71925	4.06961	8.15437	3.60981	6.79132	7.99966	0	4.62569	7.98928	-	10	23969926	23972943	+	2934	protein_coding	hypothetical protein	-
SORBI_3010G139200	0	0	0	0	0	0	0	0	0	0	0	0	0	0	0	0	0	0	0	0	-	10	23968689	23969051	-	363	protein_coding	hypothetical protein	-
SORBI_3010G139100	3.04429	0	0	0	0	0	0	0	0	0	0	0	0	0	0	0	0	0	0	0	-	10	23774936	23779836	+	3782	protein_coding	hypothetical protein	Pkinase_Tyr
SORBI_3010G139000	8.59139	18.0573	18.3098	11.3861	18.8343	16.006	18.6858	16.6116	23.6262	11.7027	13.9171	10.6645	12.2268	14.823	14.1266	14.2891	12.0788	17.5511	11.7836	15.4558	-	10	23664174	23680117	+	3988	protein_coding	G patch domain-containing protein TGH [Source:Projected from Arabidopsis thaliana (AT5G23080) UniProtKB/Swiss-Prot;Acc:Q8GXN9]	-
SORBI_3010G138950	0	0	0	0	0	0	0	0	0	0	0	0	0	0	0	0	0	0	0	0	-	10	23594578	23594963	-	288	protein_coding	hypothetical protein	-
SORBI_3010G138900	3.65258	4.16332	1.88275	3.84152	8.27176	4.30023	4.33545	3.46992	4.35507	4.00576	4.44373	4.68354	4.24055	2.1557	5.21979	4.00897	1.99317	2.48933	2.35714	2.96967	-	10	23383964	23393688	-	8421	protein_coding	hypothetical protein	-
SORBI_3010G138850	0	0	0	0	0	0	0	0	0	0	0	0	0	0	0	0	0	0	0	0	-	10	23357353	23357790	+	438	protein_coding	hypothetical protein	-
SORBI_3010G138800	0.236684	9.33197	17.2915	3.88976	0.787802	0.092863	0.44836	1.05164	0.292891	0.508758	0.168662	0.0365245	0	0.264094	0.112848	0.0480059	0.580678	0.0671959	0.0848051	0.0555694	-	10	23209632	23214961	-	3525	protein_coding	hypothetical protein	SPX
SORBI_3010G138700	0.831403	2.02182	0.0438872	0.295748	2.04254	1.24364	1.69308	1.76014	1.3196	2.99981	0.801564	0.277983	0.774793	0.626186	0.991007	0.653443	0.838565	0.295049	0.208527	0.553063	-	10	23206737	23208743	+	2007	protein_coding	hypothetical protein	PPR
SORBI_3010G138600	0	0	0	0	0	0	0	0	0	0	0	0	0	0	0	0	0	0	0	0	-	10	23012915	23021584	-	300	protein_coding	hypothetical protein	-
SORBI_3010G138500	0.547677	0.573721	0.383616	0.708099	1.47112	1.27844	0.793077	0.685441	1.36001	0.792376	1.47678	0.585111	0.652004	0.202721	1.09221	0.96931	0.180878	0.0672787	0.36228	0.729473	-	10	23005710	23010990	+	5281	protein_coding	hypothetical protein	Pkinase
SORBI_3010G138400	0.129088	0.219743	0.830476	0.00860991	0.0287725	0.0474822	0.143283	0.208762	0.0260451	0.0309685	0.0253645	0	0	0.0675174	0.129827	0.724109	0.118764	0	0	0	-	10	22940193	22960904	-	6894	protein_coding	hypothetical protein	MatE
SORBI_3010G138350	0	0	0	0	0	0	0	0	0	7.43102	0	0	0	0	0	0	0	0	0	0	-	10	22659668	22662264	-	1471	protein_coding	hypothetical protein	-
SORBI_3010G138300	1.26679	0	0	0.314389	1.15568	0	0	0	0	0.0904647	0.0926181	0.250042	0.235322	0.0493078	0	0	0	0	0.633343	0.726257	-	10	22580931	22582969	+	1888	protein_coding	hypothetical protein	-
SORBI_3010G138200	13.1336	7.30026	13.026	10.4901	14.1499	10.0919	12.3915	12.5688	7.48327	8.30816	8.11269	8.48675	9.59765	14.8708	16.4206	9.58614	14.3542	8.77173	8.52021	9.16127	-	10	22435196	22444073	-	4091	protein_coding	hypothetical protein	-
SORBI_3010G138000	10.7582	16.0568	21.7496	11.8556	12.6899	15.5566	18.2392	20.364	12.024	11.3099	9.5887	4.19322	3.10072	21.4247	30.9514	17.4479	25.0788	0.472314	3.00031	3.68893	-	10	22156857	22163945	+	3009	protein_coding	Cryptochrome 2, blue light photoreceptor, Promotion of flowering tim [Source: Projected from Oryza sativa (Os02g0625000)]	-
SORBI_3010G137800	0	0	0	0	0	0	0	0	0	0	0.0721085	0.0884872	0.229015	0	0	0	0	0	1.10946	0.807761	-	10	22104026	22104600	+	485	protein_coding	hypothetical protein	-
SORBI_3010G137700	0	0	0	0	0	0	0	0	0	0	0.483214	1.0377	3.06935	0	0	0	0	0.818189	1.0326	1.01493	-	10	22097965	22098543	-	579	protein_coding	hypothetical protein	-
SORBI_3010G137600	0	0	0	0	0	0	0	0	0	0	0.0959303	0.448808	1.39007	0	0	0	0	0.121824	0.512494	0.548501	-	10	22078757	22093507	-	5833	protein_coding	hypothetical protein	-
SORBI_3010G137500	0	0	0	0	0	0	0	0	0	0	0	0	0	0	0	0	0	0	0	0	-	10	22018972	22041564	-	3537	protein_coding	hypothetical protein	NB-ARC
SORBI_3010G137400	5.93113	54.6168	108.258	64.6547	12.8217	234.841	103.211	127.047	80.3458	23.1035	68.1496	16.3733	35.3132	75.0774	79.7309	120.332	113.069	58.1874	58.3236	43.2715	-	10	21875490	21877526	-	1266	protein_coding	hypothetical protein	Pkinase_Tyr
SORBI_3010G137366	0	0	0.310511	0.348747	0	0.048082	0	0	0	0.0501755	0.0821918	0	0	0	0	0	0.106901	0	0	0	-	10	21853884	21854734	-	851	protein_coding	hypothetical protein	-
SORBI_3010G137333	0	0	0	0	0	0	0	0	0	0	0	0	0	0	0	0	0	0	0	0	-	10	21671423	21673257	-	1740	protein_coding	hypothetical protein	-
SORBI_3010G137300	0	1.6795	0.585908	0	0	0.544361	0.613264	1.7648	0	0.0946771	0	0	0.0615699	4.46372	0.0275631	0	8.87541	0	0	0.036194	-	10	21498050	21500416	-	1804	protein_coding	hypothetical protein	Pkinase_Tyr
SORBI_3010G137200	0	0	0	0	0	0	0	0	0	0	0	0	0	0	0	0	0	0	0	0	-	10	21388154	21389547	+	849	protein_coding	hypothetical protein	-
SORBI_3010G137100	6.76434	19.7139	13.4738	18.4415	21.9716	21.0712	15.7671	17.7971	32.0938	11.258	11.9621	7.93085	6.0153	15.1912	12.9683	30.2869	21.3927	3.65707	7.10066	11.6319	-	10	21131552	21134473	+	2105	protein_coding	hypothetical protein	-
SORBI_3010G137000	0	0.0501427	0.489795	0.275054	0.0306391	0	0	0.0404191	0	0.989327	0	0	0	0	0	0	0.0421561	0	0	0	-	10	21128909	21129987	+	1079	protein_coding	hypothetical protein	-
SORBI_3010G136950	0	0	0	0	0	0	0	0	0	2.20693	0	0	0	0	0	0	0	0	0	0	-	10	21127262	21127906	+	445	protein_coding	hypothetical protein	-
SORBI_3010G136900	0	0.510834	8.85878	0	0	0.0167971	1.36247	1.59339	0	1.06924	0	0	0	0.439479	0.0612362	0	0.578851	0	0	0	-	10	21118106	21124678	-	2436	protein_coding	hypothetical protein	ABC2_membrane
SORBI_3010G136700	0	0	0	0	0	0	0	0	0	0	0	0	0	0	0	0	0	0	0	0	-	10	20936019	20937318	+	1300	protein_coding	hypothetical protein	-
SORBI_3010G136601	0	0	0	0	0	0	0	0	0	0	0	0	0	0	0	0	0	0	0	0	-	10	20915589	20916470	+	882	protein_coding	hypothetical protein	-
SORBI_3010G136600	2.27443	2.49663	4.16458	3.68293	4.0368	4.43281	2.88918	3.0466	5.29002	4.32268	3.99729	2.05959	2.11326	2.65678	2.85225	3.37576	2.99024	1.96743	1.66383	2.10446	-	10	20933645	20941696	-	7043	protein_coding	hypothetical protein	-
SORBI_3010G136500	0.566837	1.74029	1.73919	0.151227	3.15856	0.482152	1.19542	0.55557	0.243028	0.788714	1.6818	0.451031	0.477539	0.370593	0.0633424	0.107784	0.362153	0	0.685463	0.499062	-	10	20915018	20918157	-	3140	protein_coding	hypothetical protein	-
SORBI_3010G136450	0	0	0	0	0	0	0	0	0	0	0	0	0	0	0	0	0	0	0	0	-	10	20767863	20769800	-	1758	protein_coding	hypothetical protein	-
SORBI_3010G136400	0	0	0	0	0	0	0	0	0	0.375214	0	0.0754241	0	0	0	0	0	0	0.21015	0.459009	-	10	20743999	20744666	+	569	protein_coding	hypothetical protein	-
SORBI_3010G136300	0.0582417	0	0.092232	6.21536	0.207704	5.65565	0.0413735	0	1.55113	1.87788	0.842272	18.1102	106.594	0	1.97854	0.664479	0.0476298	284.487	119.262	119.512	-	10	20628782	20630945	+	955	protein_coding	hypothetical protein	-
SORBI_3010G136250	28.9903	22.9532	4.53753	58.4574	48.5875	37.57	43.3431	30.2643	26.117	34.0301	36.7742	20.0276	26.4217	24.2606	25.6153	42.0488	32.9432	6.45997	18.4798	25.524	-	10	20623250	20624115	+	330	protein_coding	hypothetical protein	-
SORBI_3010G136200	7.58466	26.0972	14.7195	7.6021	10.2272	8.2492	13.0156	15.8124	10.346	8.34578	8.61224	14.6535	15.755	13.603	7.0996	11.9224	9.58378	20.2349	14.6751	10.3353	-	10	20533978	20546912	-	3740	protein_coding	hypothetical protein	-
SORBI_3010G136100	0	0.616569	0	0	0	0	0	0	0	0	0	111.876	2615.73	0.132611	0	0	0	10789.2	2273.97	1197.43	-	10	20530171	20530521	+	351	protein_coding	hypothetical protein	-
SORBI_3010G136000	5.59524	1.20948	9.02475	6.74508	0.0985382	7.77499	9.48045	3.67227	0.284317	0.397721	1.57663	0.895422	2.66921	16.1283	6.50263	2.71106	21.9806	0.39713	0.779644	2.84627	-	10	20423371	20426054	+	2684	protein_coding	hypothetical protein	-
SORBI_3010G135900	0	0	0	0	0	0	0	0	0	0	0	0	0	0	0	0	0	0	0	0	-	10	20415336	20417082	+	1747	protein_coding	hypothetical protein	-
SORBI_3010G135800	0	0	0	0	0	0	0	0	0	0	0.116835	0.286746	0.185532	0	0	0	0	0	1.06526	0.436263	-	10	20316724	20317621	-	898	protein_coding	hypothetical protein	-
SORBI_3010G135700	0	0	0	0	0	0	0	0	0	0	0	0	0	0	0	0	0	0	0	0	-	10	20276783	20277342	-	507	protein_coding	hypothetical protein	-
SORBI_3010G135600	0.130489	1.07891	69.8453	0.557013	0.252067	0.0479974	0.11587	0.179053	0.236949	0.175305	0	0.100683	0.0325725	1.2012	0.670761	0.198499	1.30724	0.0694621	0.0701321	0	-	10	20272423	20274127	+	1705	protein_coding	hypothetical protein	-
SORBI_3010G135450	0	0.238606	0	0.130886	0.145797	0.27068	0.217815	0.24042	0.74237	0.141233	0.0385585	0	0.122461	0	0.109645	0.0932859	0	0	0	0.143978	-	10	20249382	20254942	+	907	protein_coding	hypothetical protein	-
SORBI_3010G135300	5.25092	2.60641	0.273758	1.70645	10.1593	5.59559	2.67095	1.37241	7.72559	5.04297	3.88584	4.5684	4.53091	0.434	1.50678	2.9091	0.212058	3.17477	4.73841	4.08405	-	10	20240958	20245752	+	2574	protein_coding	hypothetical protein	-
SORBI_3010G135250	15.4306	27.1094	36.8409	40.1592	39.9616	43.524	32.493	41.7912	46.6042	30.4909	33.7351	19.0435	24.4469	31.2616	18.3341	37.8441	33.4469	29.7549	20.5639	26.247	-	10	20236043	20239813	+	1413	protein_coding	hypothetical protein	-
SORBI_3010G135200	0	0	0.752834	0	0.0941868	0	0.225138	0.43488	0	0	0	0	0	0.59675	0.42499	0.0602638	0.842342	0	0	0	-	10	20161687	20162388	+	702	protein_coding	hypothetical protein	-
SORBI_3010G135100	51.8861	1.29746	0	3.55855	0	0.588745	0.568514	0	0.753527	0	0.251601	0.205834	0.26636	1.11622	0.476967	1.82612	1.41804	0	0	0	-	10	20061011	20061586	-	417	protein_coding	hypothetical protein	-
SORBI_3010G135000	31.0002	28.9912	68.0343	22.4981	12.3233	14.2626	20.818	31.4587	24.3348	9.52701	15.418	20.0353	17.2182	30.0717	16.7528	19.7121	23.4361	21.7551	23.8936	17.0841	-	10	20021054	20024137	-	1116	protein_coding	hypothetical protein	Pyr_redox_2
SORBI_3010G134900	9.5204	0.186458	0.80948	2.31835	3.62687	0.352537	0	0.0250501	0.0515665	0.907453	1.32579	0.714861	2.80711	0	0.142802	0.0242993	0	2.78906	3.29673	9.30093	-	10	19938253	19940083	-	1741	protein_coding	hypothetical protein	-
SORBI_3010G134801	0	0	0	0	0.0594596	0	0	0.0784393	0	0	0.0209668	0.0257292	0.06659	0	0	0	0	0	0	0	-	10	19930750	19932733	-	1668	protein_coding	hypothetical protein	-
SORBI_3010G134700	0.349377	0.0226566	8.99996	31.2691	47.3327	0.35983	0.0661837	0.127842	0.244369	37.9967	0.161097	0.736838	0.255819	0	0.478914	0.708629	0.228575	0.049595	3.58025	9.15975	-	10	19878437	19882014	+	2388	protein_coding	hypothetical protein	FKBP_C
SORBI_3010G134650	0.0199573	1.0483	0.0632089	0.0851908	0.628689	0.572585	0.737211	0.938907	0.966387	4.56563	0.690166	0.230981	0.0597805	0.367429	0.231937	0.637538	0.505949	0	0.107262	0.398277	-	10	19847353	19850775	+	2787	protein_coding	hypothetical protein	-
SORBI_3010G134600	0.33903	1.31913	0.157909	0.212824	1.03126	0.542832	1.77087	1.87647	1.23931	5.92494	0.940461	0.661671	0.637201	0.584126	0.85577	0.925283	0.63606	0.0424643	0.171495	0.632104	-	10	19842897	19845685	+	2789	protein_coding	hypothetical protein	PPR
SORBI_3010G134500	3.43142	8.34458	4.1071	2.21417	7.4467	2.02534	3.5997	5.75657	2.4795	4.59462	4.23986	3.60201	3.5457	3.87331	1.49813	1.03183	1.66414	2.54877	4.16026	3.84082	-	10	19639341	19667448	+	1394	protein_coding	hypothetical protein	Exonuc_X-T
SORBI_3010G134400	11.0867	13.6703	26.7558	11.7314	9.07699	29.6602	8.00883	10.2358	167.053	13.2581	11.5855	25.1811	31.775	10.0881	9.63207	11.0454	5.8997	53.0654	39.6122	45.2035	-	10	19611856	19615565	+	1781	protein_coding	hypothetical protein	-
SORBI_3010G134300	0	0	0.545397	0	0	0	0	0.0450075	0.0926495	2.64392	0	0.0885785	0	0	0	0	0.0469417	0	0	0	-	10	19545979	19546947	+	969	protein_coding	hypothetical protein	-
SORBI_3010G134200	0	21.9137	4.89342	0.0445621	0.0372292	0.33791	1.75014	3.02863	1.12896	8.41485	0.0787671	0.0644389	0	2.81306	0.0933254	0.0158803	0.49516	0	0.0673284	0.0490195	-	10	19527421	19532604	-	2664	protein_coding	hypothetical protein	-
SORBI_3010G134100	22.8398	10.8208	0.936563	4.448	10.3614	4.20573	6.28186	5.43221	9.4323	4.54018	4.95814	13.429	11.7821	9.49785	6.87321	8.54671	7.69239	11.9332	11.5337	7.33938	-	10	19518837	19523184	+	1975	protein_coding	hypothetical protein	-
SORBI_3010G134000	0.332616	4.17014	15.6264	6.84278	0.801776	0.190315	0.800735	0.956282	1.9238	15.0795	5.53055	6.8438	7.3064	0.618559	0.0165195	0.0702744	0.151118	2.55752	6.71369	8.76371	-	10	19512110	19518836	+	3010	protein_coding	hypothetical protein	PFK
SORBI_3010G133932	0.285601	0	0.33921	0.152392	0	0	0	0	0	0	0	0	0	0	0	0	0	0	0	0	-	10	19488754	19489532	-	779	protein_coding	hypothetical protein	-
SORBI_3010G133866	0	0	0	0	0	0	0	0	0	0	0	0	0	0	0	0	0	0	0	0	-	10	19453533	19454441	-	808	protein_coding	hypothetical protein	-
SORBI_3010G133800	0	0	0	0	0	0	0	0	0	0.139237	0	0.0466482	0	0	0	0	0	0	0	0	-	10	19451633	19452552	+	920	protein_coding	hypothetical protein	-
SORBI_3010G133700	0.84274	0	0	3.98281	0.0715575	2.03703	0.0855232	0	0.0971616	4.80599	0.832681	7.43139	20.3151	0.10075	1.1839	0	0.196911	48.4498	35.7173	39.8548	-	10	19450763	19451230	-	462	protein_coding	hypothetical protein	-
SORBI_3010G133632	0	0	0	0	0	0	0	0	0	0	0	0	0	0	0	0	0	0	0.620632	0.225931	-	10	19448693	19449138	+	289	protein_coding	hypothetical protein	-
SORBI_3010G133566	0	0	0	0	0	0	0	0	0	0	0	0	0	0	0	0	0	0	0	0	-	10	19448192	19450300	-	891	protein_coding	hypothetical protein	AP2
SORBI_3010G133500	3.21143	23.3264	3.71001	2.30348	6.07057	2.71107	4.60004	8.11151	10.0909	7.23444	8.12662	10.1553	12.4582	12.8207	4.6594	4.92526	8.24482	9.86473	10.7804	5.31499	-	10	19428784	19434175	-	2113	protein_coding	hypothetical protein	-
SORBI_3010G133450	1.00693	3.31153	6.37832	4.1959	7.75189	6.49041	4.01929	4.39882	13.5827	7.43558	5.33634	3.32971	3.35131	3.16998	1.80034	4.92345	5.0192	6.94262	4.99948	3.60243	-	10	19425952	19441366	+	1160	protein_coding	hypothetical protein	-
SORBI_3010G133400	74.3666	25.2885	18.6613	43.376	38.3827	24.2733	28.3588	30.4774	18.4939	52.2747	31.0285	40.4823	32.1486	19.7231	27.4551	26.9992	17.0204	25.3233	37.9616	27.9649	-	10	19418331	19424772	+	1534	protein_coding	hypothetical protein	DUF89
SORBI_3010G133300	2.20113	0.0549	0.134066	0.752875	0.0838649	0.228359	0	0	0.159422	0.303293	0.124205	0.0870955	0	0.0236157	0.0756831	0.107319	0.0461557	0	0	0	-	10	19400991	19410597	+	1971	protein_coding	hypothetical protein	Sugar_tr
SORBI_3010G133275	0	0	0	0	0	0	0	0	0	0	0	0.931613	0	0	0	0	0	0	0.346093	0	-	10	19158521	19159211	+	691	protein_coding	hypothetical protein	-
SORBI_3010G133250	0	0	0	0	0	0	0	0	0	0	0.184066	1.27996	1.46147	0	0	0	0	2.07777	0.419562	0.114551	-	10	18812021	18812590	-	570	protein_coding	hypothetical protein	-
SORBI_3010G133225	0	0	0	0	0.0426575	0.0527971	0	0.112548	0	0	0.0902519	0.886014	6.52101	0	0	0	0	11.4612	6.24877	2.94876	-	10	18768206	18768980	-	775	protein_coding	hypothetical protein	-
SORBI_3010G133200	5.04879	20.2174	34.1133	10.1472	15.5545	18.5089	12.0149	16.0989	27.8432	17.8291	15.7139	12.6606	10.5023	12.957	3.3099	16.1284	12.7307	14.1546	18.4518	15.7061	-	10	18765375	18766373	+	661	protein_coding	hypothetical protein	-
SORBI_3010G133150	0	0	0	0	0	0	0	0	0	0	0.0728596	1.07291	2.5454	0	0	0	0	2.46735	0.747345	0.952204	-	10	18750977	18751493	-	480	protein_coding	hypothetical protein	-
SORBI_3010G133100	0	0	0	0	0	0	0	0	0	0	0	0	0.074495	0	0	0	0	0	0.040099	0.0437921	-	10	18669805	18671666	+	1491	protein_coding	hypothetical protein	-
SORBI_3010G133000	0.142496	0	0	0	0	0	0	0	0	6.81877	0	0	3.84152	0.0794988	0	0	0	0	18.4315	88.6013	-	10	18563207	18564509	-	1171	protein_coding	hypothetical protein	-
SORBI_3010G132900	5.81727	17.3966	14.0067	11.7006	12.5194	12.0272	13.1808	17.6518	11.7108	13.1319	13.3799	9.09385	9.65187	10.2431	6.36047	7.82942	10.5404	12.3406	7.57805	9.34222	-	10	18475436	18479434	-	2572	protein_coding	hypothetical protein	-
SORBI_3010G132800	0.369048	0.256417	0.292214	0.309442	0	0.833869	1.57298	0.661418	3.61662	0.344023	0.182322	0.0203395	0	0.727979	0.754105	1.78444	1.37968	0	0.0283354	0	-	10	18442896	18445005	+	2110	protein_coding	hypothetical protein	-
SORBI_3010G132700	0.163912	3.66716	4.41273	5.42257	0	1.92933	5.97721	3.8557	38.2744	1.1325	0	0.0843149	0	1.73749	1.41649	25.5161	1.38515	0	0	0	-	10	18387900	18388917	+	1018	protein_coding	hypothetical protein	-
SORBI_3010G132600	12.4871	30.4483	68.4848	10.2291	10.9605	9.91612	17.0894	23.1786	10.8482	13.5816	11.736	16.7852	20.1507	20.226	20.5858	12.7015	16.3359	26.6683	19.037	30.2845	-	10	18308320	18314385	-	2971	protein_coding	hypothetical protein	-
SORBI_3010G132550	1.16249	0.260951	0.14161	0.286286	0.690955	0.263137	0.571713	0	0.577346	0.343242	0.843391	0.896964	0.446431	0.0748336	0.159884	0.272059	0.0731294	0	0.480608	0.104974	-	10	18305577	18306198	-	622	protein_coding	hypothetical protein	-
SORBI_3010G132500	14.7756	2.87452	0.0641059	3.58559	8.06037	2.0846	1.81167	1.33313	1.11078	4.6615	6.28692	11.1507	6.10331	0.474273	0.79616	0.800534	0.297946	8.18859	3.22	2.94631	-	10	18304098	18305471	-	1374	protein_coding	hypothetical protein	-
SORBI_3010G132400	0.575105	0.133195	0.173474	1.60739	0.162775	0.826011	0.350178	0.386519	0.442035	0.735833	0.241072	0	0.218753	0.206262	0.367236	0.604062	0.201565	0	0.147188	0.25719	-	10	18287069	18292770	-	2031	protein_coding	hypothetical protein	Glyco_hydro_1
SORBI_3010G132300	7.18139	5.63789	5.81709	5.80545	6.33843	4.53499	4.81255	5.76048	3.96982	5.10324	3.97198	6.41391	9.28985	5.76513	5.63597	4.69843	4.58399	13.8839	7.86967	8.57954	-	10	18282411	18289318	+	4376	protein_coding	hypothetical protein	-
SORBI_3010G132200	0.197237	3.26158	8.74569	5.68309	0.586162	4.64315	5.18416	5.25821	6.04883	1.81699	0.372049	0.760927	1.57549	1.9807	1.76326	4.9506	2.90339	0.419975	0.424025	1.85231	-	10	18280218	18280606	+	282	protein_coding	hypothetical protein	-
SORBI_3010G132100	8.06846	21.2074	45.1282	27.8464	5.91807	14.7759	20.4062	18.1718	16.764	8.34658	12.5211	22.8269	22.5687	21.5493	16.7281	15.1028	26.3934	19.617	23.4353	21.0929	-	10	18274379	18282651	-	972	protein_coding	hypothetical protein	-
SORBI_3010G132000	70.9457	0	0.196348	17.7964	0.184237	0.456061	0	0.00972186	0.300192	2.99828	2.35437	2.34385	0.84183	0.010376	0.0554211	0	0.0506982	0	0.173259	0.785973	-	10	18208955	18213440	+	4486	protein_coding	hypothetical protein	-
SORBI_3010G131950	637.141	163.88	695.461	1091.82	8.62423	522.324	165.949	101.635	113.328	14.2331	251.904	191.817	337.402	459.394	446.361	96.3822	435.879	852.717	96.0067	214.24	-	10	18156407	18156751	+	345	protein_coding	hypothetical protein	-
SORBI_3010G131900	11.4762	12.6532	23.7491	14.4427	9.06318	11.0493	13.4466	11.9382	13.9666	16.7954	12.9368	12.4533	12.4174	14.865	12.4667	10.1199	12.5635	15.9176	11.4022	10.0101	-	10	18148226	18154968	+	2433	protein_coding	hypothetical protein	zf-CCCH
SORBI_3010G131700	0.438366	34.1128	283.437	2.88941	3.29523	1.21406	1.09907	3.11372	0.665942	4.90934	2.12397	1.33305	1.87952	7.85486	0.484098	0.254969	2.12987	2.14135	3.49246	3.29951	-	10	18098327	18103055	+	2157	protein_coding	Carboxyl-terminal-processing peptidase 3, chloroplastic [Source:Projected from Arabidopsis thaliana (AT3G57680) UniProtKB/Swiss-Prot;Acc:F4J3G5]	Peptidase_S41
SORBI_3010G131600	0.204865	0.797111	3.73089	0	0	0	0.65489	0.843331	0.0413339	0.039318	0.0966094	0.35566	0.818211	1.75728	0.549434	0	8.08369	0.218108	0.330318	1.32271	-	10	18073068	18074159	-	1086	protein_coding	hypothetical protein	Mito_carr
SORBI_3010G131500	0	0	0	0	0	0	0	0	0.020544	0	0	0.569598	19.444	0.0213028	0	0	0.0624528	28.4564	27.4448	33.1998	-	10	18068578	18072864	+	2185	protein_coding	Sodium/hydrogen exchanger 4 [Source:Projected from Arabidopsis thaliana (AT5G55470) UniProtKB/Swiss-Prot;Acc:Q8S397]	Na_H_Exchanger
SORBI_3010G131400	5.6623	0.194969	0.158705	5.98914	3.12725	0.25804	0.177981	0.903677	0.161761	3.69292	3.2137	2.28114	1.25081	0	0.268777	0	0	0	2.747	2.17647	-	10	18059088	18062557	-	1110	protein_coding	hypothetical protein	-
SORBI_3010G131300	1.8601	11.5648	8.38381	3.67856	3.12349	2.89946	2.66122	2.24385	4.19913	3.19546	5.70063	2.97082	4.38989	10.7658	6.03523	8.14246	8.2016	3.93299	5.95639	5.81782	-	10	18054398	18058964	+	4276	protein_coding	hypothetical protein	BTB
SORBI_3010G131200	0	0.203653	0.552582	0.893702	0	0.0513397	0	0	0	0.696476	12.111	11.2002	2.43885	0.408815	0	0	0	0	1.95041	0.245774	-	10	18050069	18051079	+	797	protein_coding	hypothetical protein	-
SORBI_3010G131101	0.00517692	0	0	0	0	0	0	0	0	0.0079485	0.00325508	0	0	0	0	0	0	0	0	0	-	10	18019951	18030888	+	10744	protein_coding	hypothetical protein	-
SORBI_3010G131000	2.02548	25.1465	10.8044	5.40382	12.3557	12.6655	11.4162	16.9475	11.0125	9.82065	13.121	5.14091	4.86971	7.78378	2.83523	5.79745	4.96929	0.624227	3.81013	7.50865	-	10	18004006	18008046	-	2087	protein_coding	hypothetical protein	-
SORBI_3010G130900	0	0	0	0	0	0	0	0	0	64.0796	0.050104	0.092227	0	0	0	0	0	0	0	0	-	10	17977385	17978969	+	1396	protein_coding	hypothetical protein	-
SORBI_3010G130800	0	0.825594	1.9265	0.211341	0	0	0	0.88733	0	0.0217189	0.0177887	0.0436585	0.0847447	5.4691	0.101167	0	1.61956	0	0.121643	0	-	10	17958306	17960450	-	1966	protein_coding	hypothetical protein	AMP-binding
SORBI_3010G130700	0.0518046	0.0167972	0	0.0368561	0	0.114331	0.478409	0.541599	0.0139363	0.159079	0.0977192	0.226506	0.620707	0.317921	3.90566	0.078805	1.14387	0	0.482607	1.03384	-	10	17844697	17847917	+	3221	protein_coding	hypothetical protein	LRRNT_2
SORBI_3010G130601	0.622854	4.30166	0.394542	0.531751	0.259145	2.8867	2.92024	1.95352	2.36256	49.3457	0.744098	0.288351	0.435333	1.82433	1.44773	0.0947484	1.12061	0	0.267806	0.511823	-	10	17630812	17632086	+	893	protein_coding	hypothetical protein	-
SORBI_3010G130500	0.904404	0	0	0	0	0	0	0	0	0	0	0	0	0	0	0	0	0	0	0	-	10	17626364	17628357	-	1353	protein_coding	hypothetical protein	-
SORBI_3010G130400	0.754633	0	0	0	0	0	0	0	0	0	0.0558222	0.274007	0.35458	0	0	0	0	0	0.42944	0.0521101	-	10	17606922	17608640	-	1253	protein_coding	hypothetical protein	-
SORBI_3010G130300	4.99708	7.48452	7.05911	7.33248	8.0666	5.61862	5.64741	3.89594	3.89539	5.38374	8.12278	7.42656	5.89663	4.65703	4.69571	7.3424	4.20268	4.2319	8.39285	5.93279	-	10	17602360	17606572	+	1959	protein_coding	hypothetical protein	-
SORBI_3010G130200	14.3579	9.08427	10.4631	9.22046	6.85358	20.9613	14.171	9.16579	13.7153	10.4858	15.7986	15.5881	10.4031	8.71917	14.2555	15.8493	8.8583	16.1653	12.4629	12.5666	-	10	17596823	17600951	-	1751	protein_coding	hypothetical protein	-
SORBI_3010G130100	1.53878	4.12044	6.05099	2.78609	5.15881	2.3149	2.44415	2.84693	2.31629	2.90679	3.40268	3.04163	3.14192	1.80862	1.65385	1.61751	1.52706	4.96998	3.75415	4.28257	-	10	17564545	17574778	-	3217	protein_coding	hypothetical protein	PHD
SORBI_3010G130000	29.3026	28.1164	61.3015	33.1209	12.7204	23.6265	26.2267	29.5725	25.7588	16.9314	21.7305	21.9296	19.7228	32.1806	36.537	23.0225	34.539	22.9362	15.3975	20.2188	-	10	17558022	17562289	+	1957	protein_coding	EXT-like protein [Source:Projected from Arabidopsis thaliana (AT4G26750) UniProtKB/TrEMBL;Acc:A0A178UUB7]	DUF605
SORBI_3010G129900	0	0	0	0	0	0	0	0	0	0.214032	0.175301	0.968037	3.06214	0	0	0	0	3.56189	1.34859	2.61831	-	10	17555737	17556135	+	399	protein_coding	hypothetical protein	-
SORBI_3010G129700	44.9259	2.37329	3.48608	25.9392	59.9368	9.16331	2.42387	2.63227	2.60567	14.1956	20.9351	16.589	14.5251	3.03965	6.93706	6.0137	1.27518	14.101	18.516	12.8994	-	10	17533143	17538034	-	3032	protein_coding	hypothetical protein	-
SORBI_3010G129600	20.4846	10.9131	21.2138	23.3495	14.9954	22.0911	15.1663	16.04	15.586	21.2318	19.7236	17.6575	23.6579	20.0386	25.7725	34.0055	25.4478	40.6463	36.1485	36.4637	-	10	17510494	17516453	-	1993	protein_coding	hypothetical protein	DSPc
SORBI_3010G129450	0	0	0	0	0	0	0	0	0	0.38001	0	0.277775	0.269592	0	0	0	0	0	0.483718	0.739576	-	10	17464277	17467791	-	1236	protein_coding	hypothetical protein	-
SORBI_3010G129300	0	0	0	0	0	0	0	0	0	0	6.03708	18.926	1.87242	0	0	0	0	0	0.645045	0.132085	-	10	17459523	17461322	+	1483	protein_coding	hypothetical protein	-
SORBI_3010G129200	3.82615	11.7168	6.64258	7.86382	14.9758	10.2477	7.97281	7.18908	14.7532	14.7299	14.5504	5.806	4.48533	5.52629	3.48383	9.92689	6.2696	3.62088	5.22475	8.28444	-	10	17331906	17335830	-	3925	protein_coding	hypothetical protein	-
SORBI_3010G129100	0	0	0	0	0	0	0	0	0	0	0	0	0	0	0	0	0	0	0	0	-	10	17330325	17332084	+	1666	protein_coding	hypothetical protein	-
SORBI_3010G129050	0	0	0	0	0	0	0	0	0	0	0	0	0	0	0	0	0	0	0	0	-	10	17239829	17241697	+	1809	protein_coding	hypothetical protein	-
SORBI_3010G129000	0	0	0	0	0	0	0	0	0	0	0	0	0	0	0	0	0	0	0	0	-	10	17205974	17207766	+	1697	protein_coding	hypothetical protein	-
SORBI_3010G128900	0.284142	0.117467	0.652456	0.424518	1.4482	0.423287	0.227079	0.217226	0.49303	1.29789	0.142928	0.126063	0.0425564	0.16645	0.260367	0.189104	0.174278	0	0.221436	0.625421	-	10	17174797	17182710	+	7830	protein_coding	hypothetical protein	-
SORBI_3010G128800	0.0341651	0	0	0	0	0	0	0	0	0	0	0	0	0	0	0	0	0	0	0	-	10	17172501	17174220	+	1628	protein_coding	hypothetical protein	-
SORBI_3010G128700	17.7513	2.05562	2.67725	0	0	0	1.59128	5.60066	0	0	0	0	0.0422006	1.20257	0.037784	0	1.03693	0	0	0	-	10	16968976	16970381	+	1316	protein_coding	hypothetical protein	-
SORBI_3010G128601	0	0	0	0	0	0	0	0	0	0	0	0	0	0	0	0	0	0	0	0.104638	-	10	16901340	16902060	-	624	protein_coding	hypothetical protein	-
SORBI_3010G128500	5.05928	3.25049	4.30269	5.26578	12.1027	5.28416	4.41484	4.75058	3.15052	5.94578	8.34551	2.53016	2.4946	4.91339	4.38329	5.48708	8.58139	0.132996	2.58487	3.81279	-	10	16883510	16885290	-	1781	protein_coding	hypothetical protein	-
SORBI_3010G128400	11.9022	0	0	0	0	0	0	0	0	0	0	0	0	0	0	0	0	0	0	0	-	10	16881605	16882960	+	1201	protein_coding	hypothetical protein	-
SORBI_3010G128350	0	0	0	0	0	0	0	0	0	1.07332	0	0	0	0	0	0	0	0	0	0	-	10	16863502	16866869	-	1830	protein_coding	hypothetical protein	-
SORBI_3010G128300	4.2963	0	0	0	0	0	0	0	0	0	0	0	0	0	0	0	0	0	0	0	-	10	16621902	16623207	-	1204	protein_coding	hypothetical protein	-
SORBI_3010G128200	0	0	0	0.0231591	0	0	0	0	0	0	0.0136452	0	0	0	0	0	0	0	0	0	-	10	16609586	16614714	+	2563	protein_coding	hypothetical protein	-
SORBI_3010G128101	3.50205	4.67565	0.489342	2.34496	4.2855	4.21807	3.92678	2.53059	3.93469	2.02954	2.37468	2.5167	2.43399	3.2755	2.54758	4.98783	4.01516	3.2898	3.137	3.70805	-	10	16532379	16537939	-	1620	protein_coding	hypothetical protein	-
SORBI_3010G128000	12.6849	8.39822	0.26293	3.54368	0.019737	3.66428	14.9319	7.26437	1.52755	11.9048	27.999	0.076865	0.596805	285.893	480.554	11.7444	352.948	0	0	0	-	10	16460621	16463670	-	1675	protein_coding	hypothetical protein	-
SORBI_3010G127901	0.185816	0	0	0.793185	0.515405	0.410089	0.219998	0.048566	0.249937	0.380395	1.05151	0.238955	0.0618441	0.155501	1.05206	0.376883	0.0506531	0	0.133157	0.0727105	-	10	16405825	16406790	-	898	protein_coding	hypothetical protein	-
SORBI_3010G127800	11.2952	0	0	0	0.0448569	0	0	0	0	0	0	0	0	0.084209	0	0	0	0	0	0	-	10	16383448	16385836	-	2211	protein_coding	hypothetical protein	-
SORBI_3010G127700	0	0	0	0	0	0	0	0	0	0	0	0	0	0	0	0	0	0	0	0	-	10	16276626	16277606	+	624	protein_coding	hypothetical protein	-
SORBI_3010G127600	0	0.459654	0.330141	0	0	0.0102243	0.029619	0.0980785	0	0.021339	0.0174776	0	0	0.255878	0.0124247	0	0.215953	0	0	0	-	10	16167470	16173771	+	4002	protein_coding	hypothetical protein	-
SORBI_3010G127550	0	0	0	0	0	0	0	0	0	0	0	0	0	0.0253936	0	0	0	0	0	0	-	10	16111016	16112848	+	1833	protein_coding	hypothetical protein	-
SORBI_3010G127500	0	0	0	0	0	0	0	0	0	0	0	0	0	0	0	0	0	0	0	0	-	10	16106999	16108282	-	1284	protein_coding	hypothetical protein	-
SORBI_3010G127300	0	1.24404	1.29925	0	0	0	0.582819	0.189207	0	0.0185247	0	0	0	1.79724	0.539304	0	3.53235	0	0	0	-	10	16104084	16106388	+	2305	protein_coding	hypothetical protein	Pkinase
SORBI_3010G127200	0	0.254128	0.206861	0	0	0.0576577	2.35697	1.78218	0	0	0	0	0	5.66254	1.77502	0.0397418	8.50334	0	0	0	-	10	16100827	16102955	+	2129	protein_coding	hypothetical protein	Pkinase
SORBI_3010G127100	2.95446	4.96682	0.66112	6.61423	5.82169	4.15793	5.15568	2.94609	4.74286	1.87364	1.53459	1.75927	2.11627	4.24616	1.69382	7.35211	4.14946	1.16245	2.65799	2.45041	-	10	16061498	16063329	-	1732	protein_coding	hypothetical protein	-
SORBI_3010G126900	0.208513	0	0.123826	0	0	0	0.573975	0.0204369	0	0	0.0327766	0	0	0.174495	0	0	1.556	0	0.0280167	0.030597	-	10	16049286	16051495	-	2134	protein_coding	hypothetical protein	Pkinase
SORBI_3010G126800	0	0	0	0	0	0	0	0.0385267	0	0	0.0308945	0	0	0.0205594	0.0219628	0	0.0602736	0	0.0792238	0	-	10	16040372	16042635	-	2264	protein_coding	hypothetical protein	Pkinase
SORBI_3010G126700	0	0	0	0.0669562	0	0.0230783	0	0.024598	0	0.0240831	0	0	0	0	0	0	0	0	0	0.0736537	-	10	16019354	16021226	+	1773	protein_coding	hypothetical protein	-
SORBI_3010G126600	0	0.385081	0.156729	0	0	0.0728074	0.562444	2.83247	0	0	0	0	0	0.82823	0	0	0.364215	0	0	0	-	10	15996301	15997424	+	1124	protein_coding	hypothetical protein	-
SORBI_3010G126500	0	0	0.0516002	0	0	0	0.0231469	0.0510981	0	0	0	0	0	0	0	0	0	0	0	0	-	10	15907492	15909291	-	1707	protein_coding	hypothetical protein	-
SORBI_3010G126400	0.34281	0	0	0	0	0	0	0	0.645548	0	0.0718492	0.0220423	0	0	0	0.108642	0	0	0	0	-	10	15823053	15825094	-	1947	protein_coding	hypothetical protein	-
SORBI_3010G126300	0	0	0	0	0	0	0	0	0	9.89434	0	0	0	0	0	0	0	0	0	0	-	10	15820173	15821061	-	889	protein_coding	hypothetical protein	-
SORBI_3010G126200	0	0	0	0	0	0	0	0	0.143598	0.0546377	0	0	0	0	0	0.0811999	0	0	0	0	-	10	15784978	15786540	-	1563	protein_coding	hypothetical protein	-
SORBI_3010G126100	15.9159	0.661148	0.269088	0.816003	0	6.66685	0.241416	0.399705	19.4502	4.95695	0.0178068	0.240366	0.113108	0.0236999	1.46842	2.4556	0.0231601	0	0.121767	0.132982	-	10	15775962	15792095	-	1964	protein_coding	hypothetical protein	-
SORBI_3010G126000	7.6452	9.43191	14.9334	9.8075	6.71324	8.77929	11.5999	11.7177	10.4482	11.7178	8.92739	8.11874	10.6125	10.1876	10.9307	10.0495	8.01677	12.5353	12.3985	12.1332	-	10	15674036	15697426	+	2088	protein_coding	hypothetical protein	-
SORBI_3010G125900	0	0	0	0.325053	0	0	0	0	0	0	0	0	0	0.0308971	0	0.00702044	0	0	0	0	-	10	15600078	15606103	+	6026	protein_coding	hypothetical protein	-
SORBI_3010G125866	0	5.07835	4.92875	0.107142	0.298371	0.0738588	1.35509	2.28295	1.70156	3.31421	0.883784	0.309865	0.100246	1.84842	0	0.152726	0.246317	0	0.10792	0	-	10	15596908	15597636	-	554	protein_coding	hypothetical protein	-
SORBI_3010G125833	0	8.58466	8.82908	0	0.188463	0.0777535	2.36507	3.66716	1.79128	0.425979	0.0498422	0.0203878	0	3.09573	0	0.0401949	0.713089	0	0.0284027	0.0310185	-	10	15589322	15591827	-	2105	protein_coding	hypothetical protein	-
SORBI_3010G125800	0	3.09165	0.671097	0	0	0.233816	0.0752604	1.07992	0.684018	0.162664	0	0	0	1.50722	0	0	0	0	0	0	-	10	15587812	15588457	-	525	protein_coding	hypothetical protein	-
SORBI_3010G125700	16.0622	23.6994	16.8645	11.3299	12.0625	13.8551	18.878	23.1688	17.0523	21.0368	16.8528	17.3899	14.0777	20.3726	15.6535	17.2018	19.5567	9.49796	8.61519	11.6134	-	10	15557931	15587402	+	8529	protein_coding	hypothetical protein	-
SORBI_3010G125500	12.5526	16.14	21.4206	16.3982	6.66765	8.57097	10.9413	11.3697	9.78119	11.9071	8.89057	7.62585	8.39163	12.7686	14.5108	9.43773	11.7403	8.90935	5.62205	8.00296	-	10	15508131	15526464	-	1542	protein_coding	hypothetical protein	-
SORBI_3010G125400	0.268268	2.87047	1.55771	1.24057	0.372053	2.96029	6.09827	1.96325	33.8469	2.81459	0.730939	0.206992	0.357145	3.44235	1.9186	1.56434	1.38946	0	0.768972	1.04974	-	10	15481793	15482414	-	622	protein_coding	hypothetical protein	DnaJ
SORBI_3010G125300	0.0818556	0.298587	0	0.327576	0.0973055	0.421522	0.0726852	0.160457	0.049546	0	0	0	0	0.137002	0.640299	0.217907	0.184088	0	0	0	-	10	15437721	15455511	-	2718	protein_coding	hypothetical protein	-
SORBI_3010G125200	9.10104	5.11137	4.6283	9.4376	14.4281	8.56678	5.94881	5.33131	15.4354	11.6252	8.80742	6.78856	7.89268	6.19691	6.22732	8.21225	4.8793	12.5107	14.0476	11.1105	-	10	15322896	15330023	+	3673	protein_coding	hypothetical protein	-
SORBI_3010G125100	17.2446	7.83716	1.90265	7.64271	10.2357	3.15419	4.95361	4.93201	2.8709	5.85963	5.30292	12.6513	6.4451	5.91443	6.84466	7.47194	5.37515	7.62465	9.74935	7.9094	-	10	15309432	15314235	-	2361	protein_coding	hypothetical protein	-
SORBI_3010G125000	0	0.16425	0	0.0720786	0.160581	0.0248438	0.0479802	0.0264798	0.0272548	0.311106	0.148639	0.260573	3.43939	0	0	0.231176	0.0552355	0	4.50131	19.7825	-	10	15305841	15310151	-	1647	protein_coding	hypothetical protein	-
SORBI_3010G124900	0	0	0.296571	0.0399708	0	0.110216	0.212858	0.058737	0.272053	79.0154	0	0	0	0	0	0	0	0	0	0	-	10	15275988	15278799	-	1485	protein_coding	hypothetical protein	adh_short
SORBI_3010G124850	0	0	0	0	0	0	0	0	0	0.0827507	0	0	0	0	0	0	0	0	0	0	-	10	15274195	15274742	-	516	protein_coding	hypothetical protein	-
SORBI_3010G124800	0	1.69482	4.20952	0	0	0.657314	2.36435	3.60808	7.40933	0.82312	0.64608	0.482593	1.71738	3.36481	9.02617	4.63828	8.45792	0	0.600277	1.02268	-	10	15203779	15206424	+	2490	protein_coding	hypothetical protein	Pkinase
SORBI_3010G124700	0	0.235576	0.724425	0	0.0799699	0.197957	0.344079	0.548582	1.91108	3.44983	1.16745	0.726691	1.82702	0.517934	0.817905	0.327471	1.32036	0.171891	0.665271	1.29514	-	10	15183268	15185343	+	2067	protein_coding	hypothetical protein	Pkinase
SORBI_3010G124600	0	0.0903238	0.0490159	0.033031	1.01184	0.250471	0.197888	0.0728084	0.324737	6.89082	2.19917	3.05692	1.20529	0.0259024	0.193693	0.0235421	0.151875	0.131812	1.46391	0.65403	-	10	15180338	15182526	+	1797	protein_coding	hypothetical protein	adh_short
SORBI_3010G124500	0.0641903	0	0	0	0.0190765	0	0	0	0	20.8199	0	0	0	0	0	0	0	0	0	0.0376769	-	10	15123090	15125071	+	1733	protein_coding	hypothetical protein	adh_short
SORBI_3010G124400	0	0	0	0	0	0	0	0	0	0.867873	0	0	0	0	0	0	0	0	0	0	-	10	15049783	15050358	+	492	protein_coding	hypothetical protein	FAR1
SORBI_3010G124300	0	0	0	0	0	0	0	0	0	0	0	0	0	0	0	0	0	0	0	0	-	10	14980056	14980780	+	615	protein_coding	hypothetical protein	adh_short
SORBI_3010G124200	0	0.130476	0	0.238572	0	0	0	0.0876452	0	0	0	0	0	0.0748336	0	0.0340074	0.109694	0	0.0240304	0	-	10	14928312	14935806	+	2488	protein_coding	hypothetical protein	-
SORBI_3010G124166	0	0.183715	0.448633	0.0671836	0.149675	0.324193	0.111804	0.246815	0.355654	0.0241649	0.0395842	0	0	0.263421	0.0562805	0.119709	0.128711	0	0	0.0739038	-	10	14825320	14827368	+	1767	protein_coding	hypothetical protein	-
SORBI_3010G124133	0	0.0537012	0.262278	0.0294574	0.0984404	0.0812264	0	0.0649314	0	0.0635722	0.0173561	0	0	0.0462	0.320799	0	0	0	0	0	-	10	14821763	14823777	-	2015	protein_coding	hypothetical protein	-
SORBI_3010G124100	0	0	0	0	0	0.189874	0	0	0	0	0	0	0	0	0	0	0	0	0	0	-	10	14821647	14824012	-	431	protein_coding	hypothetical protein	-
SORBI_3010G124001	1.009	11.655	19.7734	6.86438	6.59692	18.3712	10.2139	13.5485	21.4773	13.9426	3.88584	1.26511	3.40017	5.69957	7.55441	25.4215	9.79867	3.49122	3.66046	3.55342	-	10	14812042	14820031	+	441	protein_coding	hypothetical protein	-
SORBI_3010G123901	1.94172	11.6981	24.5002	10.6949	7.37139	22.8089	11.0348	19.6452	32.6555	12.5501	4.01712	1.44987	3.62735	13.2616	6.77543	39.3038	12.2936	1.73381	2.49115	4.7794	-	10	14795637	14799395	+	888	protein_coding	hypothetical protein	-
SORBI_3010G123800	0	0	0	0.140323	0	0	0	0	0	4.13871	0	0	0	0	0	0	0	0	0	0	-	10	14661772	14662194	-	423	protein_coding	hypothetical protein	-
SORBI_3010G123750	0	0	0	0	0	0	0	0	0	0	0	0	0	0	0	0	0	0	0	0	-	10	14655059	14658497	+	1635	protein_coding	hypothetical protein	-
SORBI_3010G123700	23.9148	27.473	0.514095	8.43004	18.0734	18.827	24.2528	21.7213	19.213	13.8731	16.0915	29.5154	16.3691	21.3716	27.1353	32.8812	24.4689	15.6682	19.7741	13.2112	-	10	14640466	14642791	-	1028	protein_coding	hypothetical protein	SEC-C
SORBI_3010G123650	0.329117	0	0	0.175612	0.0978093	0	0.116899	0	0.132807	0.126329	0	1.7776	0.328616	0.275423	0	0	0	0	0.530659	0	-	10	14629565	14630065	-	338	protein_coding	hypothetical protein	-
SORBI_3010G123600	11.283	25.1299	20.2658	19.3914	26.0349	23.8823	18.0767	20.9084	32.1315	18.8972	19.437	11.9972	14.6953	19.3944	15.419	20.2958	17.9862	16.082	12.5649	14.9795	-	10	14628533	14636955	+	3012	protein_coding	hypothetical protein	WW
SORBI_3010G123500	1.14777	3.91407	0.396952	0.703946	5.85756	18.6634	22.3425	27.5576	15.8218	11.2926	7.29149	3.14543	4.75534	0.176647	4.11613	5.30821	0.43156	5.39353	3.65873	4.9559	-	10	14532267	14537924	-	4216	protein_coding	hypothetical protein	CCT
SORBI_3010G123400	11.4463	4.7773	8.15687	2.10213	2.49984	2.61427	6.30637	6.2825	2.42758	1.47133	2.05032	1.15019	1.70103	12.9871	13.4215	3.34068	13.6601	0.02834	0.400587	1.82804	-	10	14521567	14528093	+	4179	protein_coding	hypothetical protein	C2
SORBI_3010G123300	14.3861	6.43166	17.4513	6.17943	7.47889	12.6173	13.4647	8.5622	6.82385	4.53758	4.1952	7.72988	7.42214	6.9585	20.3122	4.77	8.02895	5.16224	4.56591	9.17315	-	10	14508516	14511908	+	2776	protein_coding	hypothetical protein	-
SORBI_3010G123100	4.34925	3.16437	0.559959	2.15088	11.6854	2.39316	1.50712	1.60808	1.88344	3.366	4.66894	3.65593	3.35405	0.976501	0.79027	1.23715	0.925344	1.80699	3.38277	2.57357	-	10	14460271	14464038	-	1573	protein_coding	hypothetical protein	-
SORBI_3010G123000	0	0	0	0	0	0	0	0	0	0	0.382214	0	0	0	0	0	0	0	0	0	-	10	14459760	14460010	-	183	protein_coding	hypothetical protein	-
SORBI_3010G122900	0.12131	0	0	0	0.180259	0.0148738	0.0287253	0.0634129	0.0326344	0.139693	0.127127	0.0468008	0	0	0.0180748	0.0153781	0.033069	0	0.021733	0.0237346	-	10	14456204	14459001	+	2751	protein_coding	hypothetical protein	-
[truncated: 35,283 more rows]

## Sheet: Table S7
Table S7. FPKM values of specifically expressed genes among different tissues of Sorghum
[truncated: 1,709 more rows]

[truncated: 6 more sheets: Table S8, Table S9, Table S10, Table S11, Table S12, Table S13]
